# Supplementary material for: Quantitative In Silico Evaluation of Allergenic Proteins from Anacardium occidentale, Carya illinoinensis, Juglans regia and Pistacia vera and Their Epitopes as Precursors of Bioactive Peptides
Source: MDPI journal article supplement (doi:10.3390/cimb44070214), 2022-07-06
Supplement: s1 [file s1]

# Quantitative *in silico* evaluation of allergenic proteins from *Anacardium occidentale*, *Carya illinoensis*, *Juglans regia* and *Pistacia vera* and their epitopes as precursors of bioactive epitopes.

Piotr Minkiewicz, Christopher P. Mattison, Małgorzata Darewicz

## Supplement

Table S1. Allergens and their epitopes analyzed in this work

| No | Allergen     | UniProt / InterPro                                                                                         | Sequence <sup>1, 2</sup>                                                                                                                                                                                                                                                                                                                                                                                                                                                                                                                                                       | Epitopes <sup>2</sup>                                                                                                                                                                                                                                                                                                                               |
|----|--------------|------------------------------------------------------------------------------------------------------------|--------------------------------------------------------------------------------------------------------------------------------------------------------------------------------------------------------------------------------------------------------------------------------------------------------------------------------------------------------------------------------------------------------------------------------------------------------------------------------------------------------------------------------------------------------------------------------|-----------------------------------------------------------------------------------------------------------------------------------------------------------------------------------------------------------------------------------------------------------------------------------------------------------------------------------------------------|
| 1  | Ana o 1.0101 | <a href="#">Q8L5L5</a> / <a href="#">IPR006045</a> , <a href="#">IPR014710</a> , <a href="#">IPR011051</a> | MGPPTKFSFSLFLVSVLVLCLGFALAKIDPELKQCKHQCKVQRQYDEQQKEQCVKECEKYYKEKKGRER<br>EHEEEEEWGTGGVDEPSTHEPAEKHLSQCMRQCERQEGGQQQLCRFCQERYKKERGQHNYKR<br>EDDEDEDEDEAEEEDENPYVFEDEDFTTKVKTEQGKVVLLPKFTQKSKLLHALEYRLAVLVANPQAFV<br>VPSHMDADSIFFVSWGRGTITKILENKRESINVRQGDIVSISSGTPFYIANNNDENEKLYLVQFLRPVNL<br>GHFEVFHSPGGENPESFYRAFSWEILEAALKTSKDTLEKLFQKQDGTIMKASKEQIRAMSRRGEGPKI<br>WPFTEESTGSKFLFKDPSQSNKYGQLFEAERIDYPPLEKLDMVVSYANITKGGMSVPFYNSRATKIAIV<br>VSGEGCVEIACPHLSSSKSSHPSYKKLRARIRKDTVFIVPAGHPFATVASGNENLEIVCFEVNAEGNIRYT<br>LAGKKNIIKVMKEAKELAFKMEGEEVDKVFGKQDEEFFFGPEWRKEKEGRADE | Epitope,protein,start,end<br>CKVQRQYDEQQKEQCVKECEKYYKEKKGREREHEEEEE,Q8L5L5,39,77<br>DEAEEEDENPYVFED,Q8L5L5,145,179<br>GPGGENPESFYRAFSWEILE,Q8L5L5,281,300<br>RRGEGPKIWPFTES,Q8L5L5,335,349<br>MVVSYANITKGGMSVPFYNSR,Q8L5L5,385,405<br>TKIAIVVSGEGCVEI,Q8L5L5,407,421<br>SSHPSYKKLRARIRKDTVFIVP,Q8L5L5,431,452<br>FGKQDEEFFFGPEWRKEKE,Q8L5L5,514,533 |
| 2  | Ana o 1.0102 | <a href="#">Q8L5L6</a> / <a href="#">IPR006045</a> , <a href="#">IPR014710</a> , <a href="#">IPR011051</a> | PPTKFSFSLFLVSVLVLCLGFALAKIDPELKQCKHQCKVQRQYDEQQKEQCVKECEKYYKEKKGREREH<br>EEEEEWGTGGVDEPSTHEPAEKHLSQCMRQCERQEGGQQQLCRFCQERYKKERGQHNYKRED<br>DEDEDEDEAEEEDENPYVFEDEDFTTKVKTEQGKVVLLPKFTQKSKLLHALEYRLAVLVANPQAFVVP<br>SHMDADSIFFVSWGRGTITKILENKRESINVRQGDIVSISSGTPFYIANNNDENEKLYLVQFLRPVNLPGH<br>FEVFHSPGGENPESFYRAFSWEILEAALKTSKDTLEKLFQKQDGTIMKASKEQVRAMSRRGEGPKIW<br>PFTEESTGSKFLFKDPSQSNKYGQLFEAERIDYPPLEKLDMVVSYANITKGGMSVPFYNSRATKIAIVV<br>SGEGCVEIACPHLSSSKSSHPSYKKLRARIRKDTVFIVPAGHPFATVASGNENLEIVCFEVNAEGNIRYTL<br>AGKKNIIKVMKEAKELAFKMEGEEVDKVFGKQDEEFFFGPEWRKEKEGRADE  | Epitope,protein,start,end<br>CKVQRQYDEQQKEQCVKECEKYYKEKKGREREHEEEEE,Q8L5L6,37,75<br>DEAEEEDENPYVFED,Q8L5L6,143,177<br>GPGGENPESFYRAFSWEILE,Q8L5L6,279,298<br>RRGEGPKIWPFTES,Q8L5L6,333,347<br>MVVSYANITKGGMSVPFYNSR,Q8L5L6,383,403<br>TKIAIVVSGEGCVEI,Q8L5L6,407,419<br>SSHPSYKKLRARIRKDTVFIVP,Q8L5L6,429,450<br>FGKQDEEFFFGPEWRKEKE,Q8L5L6,512,531 |

|   |                 |                                                                                |                                                                                                                                                                                                                                                                                                                                                                                                                                                                                                                                                                                                                                                                                                                                                                                                                                                                            |                                                                                                                                                                                                                                                                                                                                                                                                                                                                                                                                                                                                                   |
|---|-----------------|--------------------------------------------------------------------------------|----------------------------------------------------------------------------------------------------------------------------------------------------------------------------------------------------------------------------------------------------------------------------------------------------------------------------------------------------------------------------------------------------------------------------------------------------------------------------------------------------------------------------------------------------------------------------------------------------------------------------------------------------------------------------------------------------------------------------------------------------------------------------------------------------------------------------------------------------------------------------|-------------------------------------------------------------------------------------------------------------------------------------------------------------------------------------------------------------------------------------------------------------------------------------------------------------------------------------------------------------------------------------------------------------------------------------------------------------------------------------------------------------------------------------------------------------------------------------------------------------------|
| 3 | Ana o<br>2.0101 | <a href="#">Q8GZP6 / IPR022379, IPR006044, IPR006045, IPR014710, IPR011051</a> | LSVCFLLIFHGCLASRQEWQQQDECQIDRLDALEPDNRVEYEAGTVEAWDPNHE <b>QFRCA</b> GVALVRH <b>TIQPNGLILPOYSNAPQLIY</b> VV <b>DGEGMTGISYPGCP</b> TYQAPQQGRQQGQSGRFQDRHQKIRRFRRGDIIAIPAGVAHWWCYNEGNSPVVTVTLDDVSNQNLDRTPRKFHLAGNPKDV <b>FQQQQQHQSRGR</b> NLFSGFDTELLAEAFQV <b>DERLIKQLKSE</b> DNRRGGIVKVKDDELVRIRPSRSQSERGSESESEDEKRRWGQRDNGIEETICTMRLKENINDPARADIYTP <b>EVGRLTTLNSLNLPI</b> LKWLSQVEKGVLYKNALVLPHWNLNSHSIIYGCKGKGQVQVVDNFGNRVFDGEVREGQMLVVP <b>QNFAVVKRAREERFEWISFKTND</b> RAMTSPLAGRTSVLGGMPPEVLANAF <b>QISREDARKIKFNN</b> QQTTLTSGESSHHMRDDA                                                                                                                                                                                                                                                                                                                              | Epitope,protein,start,end<br>LSVCFLLIFHGCLASRQEWQQQDECQIDRLDALEPDNRVEYEAGTVEA,Q8GZP6,1,48<br><b>QFRCA</b> GVALVRH <b>TIQPNGLILPOYSNAPQLIY</b> ,Q8GZP6,55,86<br><b>QGEGMTGISYPGCP</b> ,Q8GZP6,89,103<br>YQAPQQGRQQGQSGRFQDRHQKIRRFRRGDI,Q8GZP6,105,135<br>AIPAGVAHWWCYNEGN,Q8GZP6,137,151<br>VFQQQQHQSRGRNL,Q8GZP6,185,199<br>DERLIKQLKSEDNRRGGIVKVKDDELVRIRPSRSQSERGSES,Q8GZP6,215,255<br>EESDEKRRWGQRDNGIEETICTMRLKENINDPARADIYTP <b>EVGRLTTLNSLNLPI</b> LKWLSQVEKGVLYK<br>NALVLPHWNLNSHSIIYGCKGKGQ,Q8GZP6,257,351<br>QNFAVVKRAREERFEWISFKTNDRAMTSPLAGRTSVLGGMPPEVLANAF <b>QISREDARKIKFN</b> ,<br>Q8GZP6,393,455 |
| 4 | Ana o<br>3.0101 | <a href="#">Q8H2B8 / IPR036312, IPR016140, IPR000617</a>                       | MAKFLLLLSAFVALLVANASIYRAIVEEED <b>SGREQS</b> CQRQFEEQQRFRNCQRYVKQEVQRGGRYNQ <b>RQESLRECCQELQ</b> EVDRRCRCQNLEQMVMRQL <b>QQQE</b> QIKGEEVRELYETASELPRI <b>CSISPSQGCQ</b> QS<br>SY                                                                                                                                                                                                                                                                                                                                                                                                                                                                                                                                                                                                                                                                                           | Epitope,protein,start,end<br>SGREQSQRQFEEQQRFRNCQRYVKQEVQRGGRYNQ <b>RQESLRECCQELQ</b> EVDRRCRC,Q8H2B8,33,89<br>LQQQE <b>QIKGEEVRELYET</b> ,Q8H2B8,99,116<br><b>ICSISPSQGCQ</b> ,Q8H2B8,123,134                                                                                                                                                                                                                                                                                                                                                                                                                    |
| 5 | Car i<br>1.0101 | <a href="#">Q84XA9 / IPR036312, IPR016140, IPR000617</a>                       | MARVAALLVALLFVANAAAFRTTITTTMEIDEDIDNPRRRGESCREQIQRQQYLNRCDYLRRQQCRSG <b>GYDEDNQ</b> RQHFR <b>QCC</b> QQLSQMEEQCCQCEGLRQAVRQQQEEGIRGEEMEEMVQCASDLPKECGI<br>SSRSCeirRSWF                                                                                                                                                                                                                                                                                                                                                                                                                                                                                                                                                                                                                                                                                                     | Epitope,protein,start,end<br><b>GYDEDNQ</b> RQHFR <b>QCC</b> ,Q84XA9,68,82                                                                                                                                                                                                                                                                                                                                                                                                                                                                                                                                        |
| 6 | Car i<br>2.0101 | <a href="#">B3STU4 / IPR006045, IPR014710, IPR011051, IPR006792</a>            | MVTKAKIPLFLFLSALFLALVCSSLALETEDLSNELNPHHDPESHWEFQQCQERCQHEERGQRQAQQCQRRCEEQLREREREREREIVDPREPRKQYEQCRETCEKQDPQRPQCERRCERQFQEQQERERRERRRGRRDDDDKENPRDPREQYRQCEEHCRRGQGGQGRQQQCCQSRCEERFEEEQRRQEEERERRGRDNDDEENPRDPREQYRQCEEHCRRGQGGQGRQQQCCQSRCEERLEEEQRKQEERERRRGRDDEDDQNPRDPEQR <b>YEQCQQQCER</b> QRRGQEQQLCRRRCQEQRQQEERERQGRDRQDPQYHRCQRRCQTQEQSPER <b>QRCQQRCE</b> QYKEQQGREWGPDQASPRRESRGREEQQRHNPYYFHSQGLRSRHESGEGEVKYLERFTEITELLRGIENYRVVILEANPNTFVLPYHKDAESVIVVTRGRATLTFVSQERRESFNLEYGDVIRVPAGATEYVINQDSNERLEMVKLLQPVNPNPGQFREYAAAGASTESYLRFVS <b>NDILVAAL</b> <b>NTPDRLERFFD</b> QQEQREGVIIRASQEKLRALSQHAMSAGQRPWGRSSGGPISLKSQSSYSNQFGQFFEACPEEHRQL <b>QEMDVLVNYAEIKRGAMMVPHYNSKATV</b> VVYVVEGTGRFEMACPHDVSSQSYEYKGRREQEEEESSTGQFQKVT <b>ARLARGDIFVIPAGHPIAIT</b> ASQENLRLVGFINGKNNQRNFLAQNNIINQLE <b>REAKELSFNMPREEI</b> EEIFERQVESYFVPMERQSRGQGRDHPLASILDFAFFF | Epitope,protein,start,end<br><b>YEQCQQQCER</b> ,B3STU4,272,281<br><b>QRCQQRCE</b> ,B3STU4,336,345<br><b>NDILVAALNTPDRLERFFD</b> ,B3STU4,522,541<br><b>QEMDVLVNYAEIKRGAMMVPHYNSKATV</b> ,B3STU4,610,637<br><b>ARLARGDIFVIPAGHPIAIT</b> ,B3STU4,684,704<br><b>REAKELSFNMPREEI</b> ,B3STU4,739,754                                                                                                                                                                                                                                                                                                                   |
| 7 | Car i<br>4.0101 | <a href="#">B5KVH4 / IPR022379, IPR006044, IPR006045, IPR014710, IPR011051</a> | MAKPILLSIYLCIIIVLFNGCLAQSG <b>GRQQHKFGQCQL</b> NRLDALEPTNRIEAEAGVIESWDPNHQQLQCAGVAVVRRTIENPGLL <b>PHYSNAPQLVYIARGRG</b> <b>ITGVLPFGCPETFEES</b> QRQSQQGQRREF <b>QQR</b> <b>HQKIRHFR</b> EGDIIAFAGVAHWWCYNDGSSPVVAIFLLDTHNNANQLDQNPVNFYLAGNPDDDEF <b>RPG</b> <b>GQQEYEQHRRQQHQQR</b> RGEHGEQQRDLGN <b>NVFSGFDAFLADAFNV</b> DTETARRLOQSENDHRGS <b>IVRVEGRQLQVIRPRWSREEQE</b> HEERKERERERES <b>ERRQSRRGGRDD</b> NGLEETICTLSLENIGDPSRADIYTEEAGRISTVNSHNLPIRLWLQLSAERGALYS DALY <b>PHWNLNAHSVYALRGRAEVQV</b> DNFGQTVFDDELREGQLLT <b>QNF</b> FAVVKRARE <b>DEGE</b> FEWVSFKTNENAMVSLAGRTSAIRALPEEVLVNAFQIPREDARRLKFNQESTLVRSSRSRSSERRAEV                                                                                                                                                                                                                                          | Epitope,protein,start,end<br>GRQQHKFGQCQL,B5KVH4,28,39<br><b>PHYSNAPQLVYIARGRG</b> ,B5KVH4,88,104<br><b>ITGVLPFGCPETFEES</b> QRQSQQGQRREF <b>QQRH</b> <b>HQKIRHFR</b> ,B5KVH4,106,144<br>GQQEYEQHRRQQHQQR,B5KVH4,202,219<br>NNVFSGDAFLADAFNV,B5KVH4,232,249<br><b>SIVRVEGRQLQVIRPRWSREEQE</b> ,B5KVH4,266,288<br><b>ERRQSRRGGRDD</b> ,B5KVH4,304,315<br><b>PHWNLNAHSVYALRGRAEVQV</b> ,B5KVH4,378,400<br><b>QNF</b> FAVVKRARE <b>DEGE</b> ,B5KVH4,421,435                                                                                                                                                          |
| 8 | Jug r<br>1.0101 | <a href="#">P93198 / IPR036312, IPR016140, IPR000617</a>                       | AALLVALLFVANAAAFRTTITTTMEIDEDIDNPRRRGEGCR <b>EQIQRQQLNH</b> CQYYLRQQSRSG <b>GYDE</b> <b>DNQRQHFRQCC</b> QQLSQMDEQCCEGLRQ <b>VVRRQQQQQGLRGEEMEEMVQS</b> ARDLPNECGISSQ<br>RCEIRRSWF                                                                                                                                                                                                                                                                                                                                                                                                                                                                                                                                                                                                                                                                                          | Epitope,protein,start,end<br>EQIQRQQLNHQYYLRQQS,P93198,41,60<br><b>GYDEDNQ</b> RQHFR <b>QCC</b> ,P93198,64,78<br><b>VVRRQQQQQGLRGEEMEEMVQS</b> ,P93198,96,117                                                                                                                                                                                                                                                                                                                                                                                                                                                     |

|    |                 |                                                                                                                                                                |                                                                                                                                                                                                                                                                                                                                                                                                                                                                                                                                                                                                                                                                                                                                       |                                                                                                                                                                                                                                                                                                                                                                                                                                                                                                                                                                                                                                                   |
|----|-----------------|----------------------------------------------------------------------------------------------------------------------------------------------------------------|---------------------------------------------------------------------------------------------------------------------------------------------------------------------------------------------------------------------------------------------------------------------------------------------------------------------------------------------------------------------------------------------------------------------------------------------------------------------------------------------------------------------------------------------------------------------------------------------------------------------------------------------------------------------------------------------------------------------------------------|---------------------------------------------------------------------------------------------------------------------------------------------------------------------------------------------------------------------------------------------------------------------------------------------------------------------------------------------------------------------------------------------------------------------------------------------------------------------------------------------------------------------------------------------------------------------------------------------------------------------------------------------------|
| 9  | Jug r<br>2.0101 | <a href="#">Q9SEW4 / IPR006045</a> ,<br><a href="#">IPR014710</a> ,<br><a href="#">IPR011051</a> ,<br><a href="#">IPR006792</a>                                | RGRRDDDEENPRDPREYRQCQEYCRQGQGRQQQQCQIRCEERLEE <b>DQRSQEERER</b> RRGRDVD<br>DQNPRDPEQR <b>YEQCQQQCER</b> QRRGQEQTLCRRRCE <b>QRRQQEERER</b> QRGRDRQDPQQYHRCQR<br>RCQIQEQSPER <b>QRQCQQQCER</b> QYKEQQGRERGPEASPRRESGREE <b>EQQRHNPYYFHSQSIRS</b> RHES<br>EEGEVKYLER <b>FTERTELLRGIENYRVILDANPNTSMLPHHKDAESVAVVTRGRATLTLVSQETRESFNL</b><br>ECGDVIRVPAGATVYVINQDSNERLEMVKLLQPVNN <b>PGQFREYYAAGAKSPDQSYLRVFSNDILVAAL</b><br><b>NTPRDLERFFD</b> QQEQREGVIIRASQEKLRALSQHAMSAGQRPWGRSSGGPISLKSESPSYNSQFG<br><b>QFFEACPEEHRQLQEMDVLVNYAEIKRGAMMVPHYNSKATVVVVVVEGTGRYEMACPHVSSQSYE</b><br><b>GQGRREQEEEEESTGRFQKVTARLARGDIFVIPAGHPIAIT</b> ASQENENLRLGFDINGENNQDRLAGQN<br>NIINQLE <b>REAKELSFNMPREEIEIFESQMESYFVPTERQSRRG</b> QGRDHPLASILDFAFF | Epitope,protein,start,end<br><b>DQRSQEERER</b> ,Q9SEW4,49,58<br><b>YEQCQQQCER</b> ,Q9SEW4,76,85<br>QRRQQEERER,Q9SEW4,101,110<br><b>QRQCQQQCER</b> ,Q9SEW4,140,149<br>EQQRHNPYYFHSQSIRS, Q9SEW4,175,193<br>FTERTELLRGIENYRVILDANPNTSMLPHHKDAESVAVVTRGRATLTLVSQETRESFNL,Q9SEW4,206,<br>265<br>PGQFREYYAAGAKSPDQSYLRVFS <b>NDILVAALNTPRDLERFFD</b> ,Q9SEW4,302,345<br>SGGPISLKSESPSYNSQFGQ,Q9SEW4,382,401<br><b>QEMDVLVNYAEIKRGAMMVPHYNSKATVVVVVVEGTGRYEMACPHVSSQSYE</b> ,Q9SEW4,414,457<br>SYEGQGRREQEEEEESTGRFQKVT <b>ARLARGDIFVIPAGHPIAIT</b> ,Q9SEW4,463,505<br><b>REAKELSFNMPREEIEIFESQMESYFVPTERQSRRG</b> ,Q9SEW4,541,577                      |
| 10 | Jug r 3         | <a href="#">C5H617 / IPR036312</a> ,<br><a href="#">IPR016140</a> ,<br><a href="#">IPR000528</a>                                                               | MTGSLVLKLSGMVLLCMVVAAPVAEAVITCGQVASSVSGCIGYLRGTVPVPPSCCNGVKS LNKAAT<br>TADRQAACECLKKTSGSIPGLNPGLAAGLPKGCGSVPYKISTSTNCKAVK                                                                                                                                                                                                                                                                                                                                                                                                                                                                                                                                                                                                             |                                                                                                                                                                                                                                                                                                                                                                                                                                                                                                                                                                                                                                                   |
| 11 | Jug r<br>4.0101 | <a href="#">Q2TPW5 / IPR022379</a> ,<br><a href="#">IPR006044</a> ,<br><a href="#">IPR006045</a> ,<br><a href="#">IPR014710</a> ,<br><a href="#">IPR011051</a> | <b>MAKPILLSIYFLIV</b> ALFNGCLAQSGGRQQQQGQCQLNRLDALEPTNRIEAEAGVIESWDPNNQQFQ<br><b>CAGVAVVRR</b> TIEPNGLLPQ <b>YSNAPQLVYIARGRG</b> <b>TGVLFPGCPETFEES</b> <b>QRQSQQGQSREFQQDR</b><br><b>HQKIRHFR</b> EGDIIAFPAGVAHWSYNDGSDNPVVAISLLDTNNNANQLDQNPBNFYLAGNPDDDEFPRQ<br><b>GQQEYEQHRRQQRRQQRPGEHG</b> QQQGRGLGNN <b>VTSGFDADFLADAFN</b> VDTETARRL <b>QSENDHRRS</b><br><b>IVRVEGRQLQVIRPRWSREEQEREERKERE</b> RESESE <b>ERRQSRRGGRDDNGLEETICTLRL</b> RENIGDPS<br>RADIYTEEAGRISTVNSHTLPVLRWLQLSAERGALYS DALYV <b>PHWNLNHAHSVYALRGRAEVQVY</b> DN<br>FGQTVFDDELREGQL <b>LTIPQNFVYVYKARNEGFEWVSF</b> KTENENAMVSLAGRTSAIRALPEEV <b>LATAF</b><br><b>QIPREDARRLKFNREQESTLVRSRPSRSRSSRSERRAEV</b>                                                    | Epitope,protein,start,end<br>MAKPILLSIYFLIV,Q2TPW5,1,15<br>IESWDPNNQQFQ,CAG,Q2TPW5,57,71<br><b>YSNAPQLVYIARGRG</b> ,Q2TPW5,89,103<br><b>TGVLFPGCPETFEES</b> ,Q2TPW5,105,119<br>RQSQQGQSREFQQ <b>DRHQKIRHFR</b> ,Q2TPW5,121,143<br>GDIIAFPAGVAHWSY,Q2TPW5,145,159<br>GQQEYEQHRRQQRRQQRPGEHG,Q2TPW5,201,223<br><b>VFSGFDADFLADAFN</b> ,Q2TPW5,233,247<br><b>QSENDHRRSIVRVEGRQLQVIRPRWSREEQEREERKERE</b> ,Q2TPW5,257,295<br><b>ERRQSRRGGRDDNGLEETICTLRL</b> ,Q2TPW5,303,327<br><b>PHWNLNHAHSVYALRGRAEVQVY</b> ,Q2TPW5,377,399<br><b>LTIPQNFVYVYKARNEGFEWVSF</b> ,Q2TPW5,417,439<br>LATAFQIPREDARRL,Q2TPW5,465,479<br>FNRQESTLVRSRPSRSRSSRSER,481,503 |
| 12 | Pis v<br>1.0101 | <a href="#">B7P072 / IPR036312</a> ,<br><a href="#">IPR016140</a> ,<br><a href="#">IPR000617</a>                                                               | MAKLVLILLSAFALILAAANASIYRATVEVEGENLSSGQSCQKQFEEQKFKHCQMYVQQEVQKSQDG<br>HSLTARINQRQCFKQCCQELQEVDDKKCRQCQNLQEMVKRQQQQGQFRGEKLQELYETASELPRMC<br>NISPSQGCQFSSPYWSY                                                                                                                                                                                                                                                                                                                                                                                                                                                                                                                                                                        |                                                                                                                                                                                                                                                                                                                                                                                                                                                                                                                                                                                                                                                   |
| 13 | Pis v<br>2.0101 | <a href="#">B7P073 / IPR022379</a> ,<br><a href="#">IPR006044</a> ,<br><a href="#">IPR006045</a> ,<br><a href="#">IPR014710</a> ,<br><a href="#">IPR011051</a> | MGYSLLSFSGLFLLFHCSFAQIEQVVSQQRRQQQRFQTCQIQNLNALEPKRIESEAGVTEFWD<br>QNEEQQLQCANVAVFRHTIQSRGLLVPSYDAPELVYVVQSGGIHGAVFPGCPETFQEESSQSRRSERS<br>QQSGEQHQKVRPIQEGDVIALPAGVAHWIYNNNGQSKLVVALADVGNSENQLDQYLRFVLGGSPQ<br>QEIQSGSQSRSSQSSRRGQQGQQSNNILSAFDEEILAQSFNIDTQLARRLQKEKQRGRIIVRVQE<br>DLEVLSPHRQEQEYEEERERRQRNGLEETFCMTLKYNNINDPSRADVYNPRGGRVSSVNALNLPIL<br>RFLQLSAKKGVLRDAILAPHWNVNNAHSIVYITRGNRIQVSENGESVFDEIREGQLVVPQNFVAV<br>KRASSDKFEWVSFKTNGLSQSLAGRVSVFRALPLDVIKNSFDISREDARRLKESRSETTIFAPGSSSQR<br>KSQSERERQREEREIEIH                                                                                                                                                                                                           |                                                                                                                                                                                                                                                                                                                                                                                                                                                                                                                                                                                                                                                   |

|    |                 |                                                                                                                                                                                               |                                                                                                                                                                                                                                                                                                                                                                                                                                                                                                                                                                                 |                                                                                                                        |
|----|-----------------|-----------------------------------------------------------------------------------------------------------------------------------------------------------------------------------------------|---------------------------------------------------------------------------------------------------------------------------------------------------------------------------------------------------------------------------------------------------------------------------------------------------------------------------------------------------------------------------------------------------------------------------------------------------------------------------------------------------------------------------------------------------------------------------------|------------------------------------------------------------------------------------------------------------------------|
| 14 | Pis v<br>2.0201 | <a href="#">B7P074 / IPR022379</a> ,<br><a href="#">IPR006044</a> ,<br><a href="#">IPR006045</a> ,<br><a href="#">IPR014710</a> ,<br><a href="#">IPR011051</a>                                | MGYSLLSFLGLLLFHCFAQIEQVNSQQRQQRFQTCQCIQNLNALEPKRRIESEAGVTEFWD<br>QNEEQQLQCANVAVFRHTIQSRGLLVPSYNNAPELVYVVGSGIHGAVFPGCPETFQEEESQSRSQHS<br>SRSESRQSGEQHQKVRHIREGDIAPAGVAHWIYNNQSKLVVALADVGNSENQLDQYLKRFVL<br>GGSPQQEIQGGGQSWQSRSRRKGQSNILSAFDEEILAQSFNIDTQLVKKLQREEKQRGIIVRVKE<br>DLQVLSPPQRQEKEYSDNGLEETFCMTLKLININDPSRADVYNPRGGRVTSINALNLPILRFLQLSVEKG<br>VLYQNAIMAPHWNMNAHSIVYITRGNGRMQIVSENGESVFDEEIREGQLVVPQNFAVVKRASSDG<br>FEWVSFKTNGLAKISQLAGRISVMRGLPLDVIQNSFDISREDAWNLKESRSEMTIFAPGSRSQRRN                                                                                |                                                                                                                        |
| 15 | Pis v<br>3.0101 | <a href="#">B4X640 / IPR006045</a> ,<br><a href="#">IPR014710</a> ,<br><a href="#">IPR011051</a>                                                                                              | KTDPELQCKKHQCKVQRQYDEEQEQCAKGCCKYKKEKKGREQEEEEEEWGSGRGRGDEFSTHEP<br>GEKRLSQCMKQCERQDGGGQKQLCRFCQEKYKKERREHSYSRDEEEEEEGDEEEDENPYVFED<br>EHFTTRVKTEQGKVVLPKFTKRKLLRGLEKYRLAFLVANPQAFVVPNHMDADSIFFVSWGRGTITKI<br>RENKRESMNVKQGDIIIRAGTPFYIVNTDENEKLYIVKLLQPVNLPGHYEVFH <b>IPGGENPESFYRAFS</b><br><b>REVLE</b> AALKTPRDKLEKLEKQDEGAIVKASKEQIRAMSRRGEGPSIWPFTGKSTGTFNLFKKDPSQSN<br>NYGQLFESEFKDYPLQELDIMVSYVNITKGGMSGPFYNSRATKIAIVVSGEGRLEIACPHLSSSKNSGQ<br>EKSGPSYKLLSSSIRTDSVFVVPAGHPFVTVASGNQNLILCFEVNAEGNIRYTLAGKKNIIEVMEKEAKE<br>LAFKTKGEEVDK <b>VFGKQDEEFFQGPKWQRH</b> QQGRADE | Epitope, protein, start, end<br><b>IPGGENPESFYRAFSREVLE</b> , B4X640, 257, 276<br>VFGKQDEEFFQGPKWQRH, B4X640, 494, 512 |
| 16 | Pis v<br>4.0101 | <a href="#">B2BDZ8 / IPR001189</a> ,<br><a href="#">IPR019833</a> ,<br><a href="#">IPR019832</a> ,<br><a href="#">IPR019831</a> ,<br><a href="#">IPR036324</a> ,<br><a href="#">IPR036314</a> | MALLSYVTRKTLTESLRLGLKSHVRGLQTFTLPDLPYEGALEPAISSEIMQLHHQKHHQTYITNYNKAL<br>EQLDQAINKGDA SAVVKLQSAIKFNGGGHINHSIFWKNLTPVSEGGGEPPHGSGLWAIDTNFGSMEA<br>LIQRMNAEGAALQGSQVWVWGLDKESKLVVETTANQDPLVTGKPSLVPLLGIDVWEHAYYLQYKN<br>VRPDYLNKNIWKVINWKYAGELYQKECP                                                                                                                                                                                                                                                                                                                              |                                                                                                                        |
| 17 | Pis v<br>5.0101 | <a href="#">B7SLJ1 / IPR006044</a> ,<br><a href="#">IPR006045</a> ,<br><a href="#">IPR014710</a> ,<br><a href="#">IPR011051</a>                                                               | MANPSLLSVCLLILFHGLASRQQGQQQNECQIDQLDALEPDNRVEYEAAGMVETWDPNHEQFRC<br>AGVAVARHTIQPNGLRLPEYSNAPTLMYIVEGEGMTGLIPGCPETYQAPQGGQHQGSSRFQDKH<br>QKIQRFKRGDIIPAGVANWCYNENSPVVTLLDVSNSQNQLDMYPRKFNLAGNPEDEFQQQQ<br>QQQSRGRRQSQQKSCNNIFCGFDTKILAEVFQVEQSLVKQLQNEKDNRGAIV <b>KVKGDLQVIRPPRRQ</b><br><b>SERGF</b> FESEEESEYERGRGRDNGLEETICTMCLKENIHDPSPRSDIYT <b>PEVGRITSLNSLNLPLKWL</b> QLSA<br>ERGVLQNNALMVPHWNFNHSAHSIVYGCKGNAQVQVVDNFGNTVFDGEVSEGQIFVVPQNFAVVKR<br>ARGQRFEWISFKTNDRAMISPLAGSTSVLRAMPEEVLANAFQISREDARKIKFNNEQPTLSSGQSSQQ<br>MRDDA                                         | Epitope, protein, start, end<br>KVKGDLQVIRPPRRQSERG, B7SLJ1, 251, 269<br>PEVGRITSLNSLNLPLKWL, B7SLJ1, 313, 332         |

1. Epitopes indicated using red font.
2. Green background indicates epitopes with highest  $\Sigma A$  (range 1.6000-2.1000), blue background indicates epitopes with lowest  $\Sigma A$  (range 0.1000-0.5999), bold font – fragments occurring in proteins from *Juglans regia* and their homologs from *Carya illinoensis*

Table S2. Sequences of epitopes, retrieved from the IEDB database and taken into account in this work

| ID     | Epitope         | Antigen | Organism                         |
|--------|-----------------|---------|----------------------------------|
| 137395 | EESEDEKRRWGQRDN | Ana o 2 | Anacardium occidentale (maranon) |
| 2023   | AIMGPPTKFSFSLFL | Ana o 1 | Anacardium occidentale (maranon) |
| 6532   | CKVQRQYDEQQKEQC | Ana o 1 | Anacardium occidentale (maranon) |
| 6897   | CQRQFEEQQRFR    | Ana o 3 | Anacardium occidentale (maranon) |
| 7902   | DEAEEEDENPYVFED | Ana o 1 | Anacardium occidentale (maranon) |
| 11234  | ECCQELQEVDRR    | Ana o 3 | Anacardium occidentale (maranon) |
| 11615  | EEFFFGPEWRKEKE  | Ana o 1 | Anacardium occidentale (maranon) |
| 12729  | EKKGREREHEEEEE  | Ana o 1 | Anacardium occidentale (maranon) |
| 13908  | EQQKEQCVCCEKYY  | Ana o 1 | Anacardium occidentale (maranon) |
| 13911  | EQQRFRNCQRYV    | Ana o 3 | Anacardium occidentale (maranon) |
| 25525  | ICSISPSQGCQF    | Ana o 3 | Anacardium occidentale (maranon) |
| 26794  | IKGEEVRELYET    | Ana o 3 | Anacardium occidentale (maranon) |
| 30318  | KECEKYYKEKKGRER | Ana o 1 | Anacardium occidentale (maranon) |
| 32975  | KQEVQRGGRYNQ    | Ana o 3 | Anacardium occidentale (maranon) |
| 38962  | LQQQEIQKGEV     | Ana o 3 | Anacardium occidentale (maranon) |
| 44369  | NITKGGMSVPFYNSR | Ana o 1 | Anacardium occidentale (maranon) |
| 50648  | QELQEVDRRCRC    | Ana o 3 | Anacardium occidentale (maranon) |
| 50677  | QEQIKGEEVREL    | Ana o 3 | Anacardium occidentale (maranon) |
| 50752  | QFEEQQRFRNCQ    | Ana o 3 | Anacardium occidentale (maranon) |
| 53773  | RFRNCQRYVKQE    | Ana o 3 | Anacardium occidentale (maranon) |
| 55412  | RQESLRECCQEL    | Ana o 3 | Anacardium occidentale (maranon) |
| 55567  | RRGEGPKIWPFTES  | Ana o 1 | Anacardium occidentale (maranon) |
| 56675  | RYVKQEVQRGGR    | Ana o 3 | Anacardium occidentale (maranon) |
| 58215  | SGREQSCQRQFE    | Ana o 3 | Anacardium occidentale (maranon) |
| 59430  | SLRECCQELQEV    | Ana o 3 | Anacardium occidentale (maranon) |
| 61072  | SSHPSYKKLRARIRK | Ana o 1 | Anacardium occidentale (maranon) |
| 64582  | TKIAIVVSSEGCVET | Ana o 1 | Anacardium occidentale (maranon) |
| 75208  | YNQRQESLRECC    | Ana o 3 | Anacardium occidentale (maranon) |
| 137514 | AIPAGVAHWCYNEGN | Ana o 2 | Anacardium occidentale (maranon) |
| 137516 | ALVLPHWNLNSHSII | Ana o 2 | Anacardium occidentale (maranon) |
| 137519 | AREERFEWISFKTND | Ana o 2 | Anacardium occidentale (maranon) |
| 137527 | FHGCLASRQEWQQQD | Ana o 2 | Anacardium occidentale (maranon) |
| 137528 | FQJSREDARKIKFNN | Ana o 2 | Anacardium occidentale (maranon) |
| 137539 | KVKDELVRVIRPSRS | Ana o 2 | Anacardium occidentale (maranon) |

|        |                          |         |                                  |
|--------|--------------------------|---------|----------------------------------|
| 137540 | LDRTPRKFHLAGNPK          | Ana o 2 | Anacardium occidentale (maranon) |
| 137542 | LKWLQLSVEKGVLYK          | Ana o 2 | Anacardium occidentale (maranon) |
| 137544 | LNSHSIIYGCKGKGQ          | Ana o 2 | Anacardium occidentale (maranon) |
| 137546 | LSVCFILFHGCLAS           | Ana o 2 | Anacardium occidentale (maranon) |
| 137551 | PEEVLANAFQISRED          | Ana o 2 | Anacardium occidentale (maranon) |
| 137554 | QDRHQKIRRFRRGDI          | Ana o 2 | Anacardium occidentale (maranon) |
| 137555 | QEWQQQDECQIDRLD          | Ana o 2 | Anacardium occidentale (maranon) |
| 137556 | QGEGMTGISYPGCPE          | Ana o 2 | Anacardium occidentale (maranon) |
| 137557 | QNFAVVKRAREERFE          | Ana o 2 | Anacardium occidentale (maranon) |
| 137558 | QQGQSGRFQDRHQKI          | Ana o 2 | Anacardium occidentale (maranon) |
| 137566 | RLIKQLKSEDNRGGI          | Ana o 2 | Anacardium occidentale (maranon) |
| 137576 | SRQEWQQQDECQIDR          | Ana o 2 | Anacardium occidentale (maranon) |
| 137579 | VFQQQQHQSRGRNL           | Ana o 2 | Anacardium occidentale (maranon) |
| 137580 | VIRPSRSQSERGES           | Ana o 2 | Anacardium occidentale (maranon) |
| 137586 | YQAPQQGRQQGQSGR          | Ana o 2 | Anacardium occidentale (maranon) |
| 151824 | DALEPDNRVEYEAGTVEA       | Ana o 2 | Anacardium occidentale (maranon) |
| 152103 | RWGQRDNGIETICTMRLKENINDP | Ana o 2 | Anacardium occidentale (maranon) |
| 186822 | ALEPDNRVEY               | Ana o 2 | Anacardium occidentale (maranon) |
| 186832 | DERLIKQLKSEDNRGGIVKVKD   | Ana o 2 | Anacardium occidentale (maranon) |
| 186846 | FKTNDRAMTSLAGRTSVLGGM    | Ana o 2 | Anacardium occidentale (maranon) |
| 186887 | LIKQLKSEDNRGGIVK         | Ana o 2 | Anacardium occidentale (maranon) |
| 186888 | LIKQLKSEDNRGGIVKVKDD     | Ana o 2 | Anacardium occidentale (maranon) |
| 186889 | LIKQLKSEDNRGGIVKVKDDEL   | Ana o 2 | Anacardium occidentale (maranon) |
| 186903 | NDRAMTSLAGRTSVLG         | Ana o 2 | Anacardium occidentale (maranon) |
| 186919 | QFRCAGVALVRHTIQ          | Ana o 2 | Anacardium occidentale (maranon) |
| 186930 | SEDNRGGIVKVKDD           | Ana o 2 | Anacardium occidentale (maranon) |
| 186950 | VEYEAGT                  | Ana o 2 | Anacardium occidentale (maranon) |
| 186956 | VRHTIQPNGLLPQYSNAPQLIY   | Ana o 2 | Anacardium occidentale (maranon) |
| 606390 | ALVLPHWNLNSHSIIYGCKG     | Ana o 2 | Anacardium occidentale (maranon) |
| 606416 | EKGVLYKNALVLPHWNLNSH     | Ana o 2 | Anacardium occidentale (maranon) |
| 606445 | GPGGENPESFYRAFSWEILE     | Ana o 1 | Anacardium occidentale (maranon) |
| 606453 | HPSYKKLRARIRKDTVFIYP     | Ana o 1 | Anacardium occidentale (maranon) |
| 606467 | KVKDDELVRIRPSRSQSERG     | Ana o 2 | Anacardium occidentale (maranon) |
| 606495 | MVVSYANITKGGMSVPFYNS     | Ana o 1 | Anacardium occidentale (maranon) |
| 606499 | PARADIYTPEVGRLTTLNSL     | Ana o 2 | Anacardium occidentale (maranon) |
| 606501 | PEVGRLTTLNSLNLPIKWL      | Ana o 2 | Anacardium occidentale (maranon) |
| 606512 | QNFAVVKRAREERFEWISFK     | Ana o 2 | Anacardium occidentale (maranon) |

|        |                    |                     |                                  |
|--------|--------------------|---------------------|----------------------------------|
| 606540 | VFGKQDEEFFQGPWRKEK | Ana o 1             | Anacardium occidentale (maranon) |
| 157186 | EESQRQSQGQR        | Car i 4             | Carya illinoensis (pecan)        |
| 157218 | EQHRRQQHQQR        | Car i 4             | Carya illinoensis (pecan)        |
| 157220 | ERRQSRGGRDD        | Car i 4 and Jug r 4 | Carya illinoensis (pecan)        |
| 157228 | FAVVKRARDEGF       | Car i 4             | Carya illinoensis (pecan)        |
| 157230 | FDAEFLADAFNV       | Car i 4             | Carya illinoensis (pecan)        |
| 157280 | FSGFDAEFLADA       | Car i 4             | Carya illinoensis (pecan)        |
| 157340 | GQRREFQQDRHQ       | Car i 4             | Carya illinoensis (pecan)        |
| 157343 | GRQQHKFGQCQL       | Car i 4             | Carya illinoensis (pecan)        |
| 157381 | HSVYALRGRAE        | Car i 4 and Jug r 4 | Carya illinoensis (pecan)        |
| 157603 | LNAHSVYALRG        | Car i 4 and Jug r 4 | Carya illinoensis (pecan)        |
| 157725 | NNVFSGFDAEFL       | Car i 4             | Carya illinoensis (pecan)        |
| 157741 | PHYSNAPQLVYI       | Car i 4             | Carya illinoensis (pecan)        |
| 157762 | PQNFAVVKRARD       | Car i 4             | Carya illinoensis (pecan)        |
| 157770 | QEYEQHRRQQQH       | Car i 4             | Carya illinoensis (pecan)        |
| 157773 | QGGQEYEQHRRQ       | Car i 4             | Carya illinoensis (pecan)        |
| 157808 | QQDRHQIRHFR        | Car i 4 and Jug r 4 | Carya illinoensis (pecan)        |
| 157812 | QRQSQGQRREF        | Car i 4             | Carya illinoensis (pecan)        |
| 157835 | REFQQDRHQIR        | Car i 4 and Jug r 4 | Carya illinoensis (pecan)        |
| 158291 | SQQGQRREFQQD       | Car i 4             | Carya illinoensis (pecan)        |
| 114650 | VFSGFADFLADAFN     | Jug r 4             | Juglans regia (English walnut)   |
| 21102  | GLRGEEMEEMVQS      | Jug r 1             | Juglans regia (English walnut)   |
| 50901  | QGLRGEEMEEMV       | Jug r 1             | Juglans regia (English walnut)   |
| 52113  | QQQGLRGEEMEEM      | Jug r 1             | Juglans regia (English walnut)   |
| 55473  | RQQQQQGLRGEEM      | Jug r 1             | Juglans regia (English walnut)   |
| 71816  | VVRRQQQQGLRG       | Jug r 1             | Juglans regia (English walnut)   |
| 114293 | DDNGLEETICTLRLR    | Jug r 4             | Juglans regia (English walnut)   |
| 114339 | FNRQUESTLVRSPSR    | Jug r 4             | Juglans regia (English walnut)   |
| 114351 | GDIIAFPAGVAHWSY    | Jug r 4             | Juglans regia (English walnut)   |
| 114396 | HRRQQQRQRPGEHG     | Jug r 4             | Juglans regia (English walnut)   |
| 114404 | IESWDPNNQQFQCAG    | Jug r 4             | Juglans regia (English walnut)   |
| 114442 | LATAFQIPREDARRL    | Jug r 4             | Juglans regia (English walnut)   |
| 114462 | LTIPQNFAVVKRARN    | Jug r 4             | Juglans regia (English walnut)   |
| 114468 | MAKPILLSIYFLIV     | Jug r 4             | Juglans regia (English walnut)   |
| 114508 | PHWNLNAHSVYALR     | Jug r 4 and Car i 4 | Juglans regia (English walnut)   |
| 114531 | QGGQEYEQHRRQQQR    | Jug r 4             | Juglans regia (English walnut)   |
| 114543 | QLQVIRPRWSREEQE    | Jug r 4             | Juglans regia (English walnut)   |

|        |                        |                     |                                |
|--------|------------------------|---------------------|--------------------------------|
| 114555 | QSENDHRRSIVRVEG        | Jug r 4             | Juglans regia (English walnut) |
| 114569 | REFQQDRHQKIRHFR        | Jug r 4 and Car i 4 | Juglans regia (English walnut) |
| 114590 | RQSQQGQSREFQQDR        | Jug r 4             | Juglans regia (English walnut) |
| 114610 | SIVRVEGRQLQVIRP        | Jug r 4 and Car i 4 | Juglans regia (English walnut) |
| 114620 | SVVYALRGRAEVQVV        | Jug r 4             | Juglans regia (English walnut) |
| 114627 | TGVLFPGPCPETFEES       | Jug r 4 and Car i 4 | Juglans regia (English walnut) |
| 114666 | VRSRPSRSRSSRSE         | Jug r 4             | Juglans regia (English walnut) |
| 114671 | VVKRARNEGFEWVSF        | Jug r 4             | Juglans regia (English walnut) |
| 114676 | WSREEQEREERKERE        | Jug r 4             | Juglans regia (English walnut) |
| 114695 | YSNAPQLVYIARGRG        | Jug r 4 and Car i 4 | Juglans regia (English walnut) |
| 157171 | DQRSQEERER             | Jug r 2             | Juglans regia (English walnut) |
| 157811 | QRQCQQRCE              | Jug r 2 and Car i 2 | Juglans regia (English walnut) |
| 157813 | QRRQQEERER             | Jug r 2             | Juglans regia (English walnut) |
| 158326 | SYEGQGRR               | Jug r 2             | Juglans regia (English walnut) |
| 158509 | YECCQQQCE              | Jug r 2 and Car i 2 | Juglans regia (English walnut) |
| 174135 | GYDEDNQRRHQFRQCC       | Jug r 1 and Car i 1 | Juglans regia (English walnut) |
| 174256 | REAKELSFNMPREEI        | Jug r 2 and Car i 2 | Juglans regia (English walnut) |
| 241140 | AAGAKSPDQSYLRVFSNDIL   | Jug r 2             | Juglans regia (English walnut) |
| 241161 | ARLARGDIFVIPAGHPAIIT   | Jug r 2 and Car i 2 | Juglans regia (English walnut) |
| 241183 | EAKELSFNMPREEIEEFES    | Jug r 2             | Juglans regia (English walnut) |
| 241188 | EIQRRQQLNHCQYYLRQQS    | Jug r 1             | Juglans regia (English walnut) |
| 241196 | FTERTELLRGIENYRVVILD   | Jug r 2             | Juglans regia (English walnut) |
| 241281 | KATVVVVYVEGTGRYEMACP   | Jug r 2             | Juglans regia (English walnut) |
| 241344 | NDILVAALNTPRDLERFFD    | Jug r 2 and Car i 2 | Juglans regia (English walnut) |
| 241350 | PGQFREYYAAGAKSPDQSYL   | Jug r 2             | Juglans regia (English walnut) |
| 241355 | QEMDVLVNYAEIKRGAMMVP   | Jug r 2 and Car i 2 | Juglans regia (English walnut) |
| 241367 | QSYLRVFSNDILVAALNTPR   | Jug r 2             | Juglans regia (English walnut) |
| 241369 | REQEEEESTGRFQKV TARLA  | Jug r 2             | Juglans regia (English walnut) |
| 241371 | RGIENYRVVILDANPNTSML   | Jug r 2             | Juglans regia (English walnut) |
| 241538 | TGRFQKV TARLARGDIFVIP  | Jug r 2             | Juglans regia (English walnut) |
| 241541 | TRGRATLTLVSQETRESFNL   | Jug r 2             | Juglans regia (English walnut) |
| 241546 | TSMLPHHKDAESVAVVTRGR   | Jug r 2             | Juglans regia (English walnut) |
| 241557 | YAEIKRGAMMVPHYNSKATV   | Jug r 2 and Car i 2 | Juglans regia (English walnut) |
| 535661 | EQQRHNPPYYFHSQSIRSRH   | Jug r 2             | Juglans regia (English walnut) |
| 536236 | IFESQMESYFVPTERQSRRG   | Jug r 2             | Juglans regia (English walnut) |
| 537779 | SGGPISLKSESPSYSNQFGQ   | Jug r 2             | Juglans regia (English walnut) |
| 606421 | ERGV LQNNALMVP HWNFNAS | Pis v 5             | Pistacia vera (pistachio)      |



|        |                      |         |                           |
|--------|----------------------|---------|---------------------------|
| 606444 | GPGGENPESFYRAFSREVLE | Pis v 3 | Pistacia vera (pistachio) |
| 606468 | KVKGDLQVIRPPRRQSERG  | Pis v 5 | Pistacia vera (pistachio) |
| 606500 | PEVGRITSLNSLNLPIKWL  | Pis v 5 | Pistacia vera (pistachio) |
| 606541 | VFGKQDEEFFQGPWRQH    | Pis v 3 | Pistacia vera (pistachio) |

Red font – epitopes found in proteins both from *Carya illinoensis* and from *Juglans regia*

Blue font – epitopes not found in protein sequences

Table S3. Values of  $\Sigma A$ ,  $DH_t$  and  $\Sigma A_E$  parameters for entire proteins and their epitopes

| Protein               | Set of domains | $\Sigma A$ for entire proteins | $\Sigma A$ for epitopes (Mean $\pm$ SD) | Sequence coverage of epitopes [%] | $DH_t$ for entire proteins [%] | $DH_t$ for epitopes [%] (Mean $\pm$ SD) | $\Sigma A_E$ for entire proteins | $\Sigma A_E$ for epitopes (Mean $\pm$ SD) |
|-----------------------|----------------|--------------------------------|-----------------------------------------|-----------------------------------|--------------------------------|-----------------------------------------|----------------------------------|-------------------------------------------|
| Ana o 1.0101 (Q8L5L5) | 3a             | 1.3571                         | 1.4342 $\pm$ 0.3830 (n = 8)             | 31.04                             | 81.7505                        | 81.2892 $\pm$ 10.0853 (n = 8)           | 0.2176                           | 0.2831 $\pm$ 0.2283 (n = 8)               |
| Ana o 1.0102 (Q8L5L6) | 3a             | 1.3360                         | 1.4342 $\pm$ 0.3830 (n = 8)             | 31.16                             | 79.4393                        | 81.2892 $\pm$ 10.0853 (n = 8)           | 0.2126                           | 0.2831 $\pm$ 0.2283 (n = 8)               |
| Ana o 2.0101 (Q8GZP6) | 3a             | 1.3657                         | 1.3930 $\pm$ 0.2400 (n = 9)             | 79.21                             | 79.1667                        | 77.6598 $\pm$ 7.9794 (n = 9)            | 0.2276                           | 0.2368 $\pm$ 0.0795 (n = 9)               |
| Ana o 3.0101 (Q8H2B8) | 1              | 1.1012                         | 0.9011 $\pm$ 0.2867 (n = 3)             | 63.04                             | 76.6423                        | 68.3187 $\pm$ 27.9529 (n = 3)           | 0.1739                           | 0.0722 $\pm$ 0.0625 (n = 3)               |
| Car i 1.0101 (Q84XA9) | 1              | 1.0911                         | 0.7333                                  | 10.49                             | 77.4648                        | 92.8571                                 | 0.1539                           | 0.0000                                    |
| Car i 2.0101 (B3STU4) | 2              | 1.1643                         | 1.0004 $\pm$ 0.5244 (n = 6)             | 13.01                             | 82.6802                        | 79.4904 $\pm$ 4.5504 (n = 6)            | 0.1504                           | 0.1710 $\pm$ 0.1472 (n = 6)               |
| Car i 4.0101 (B5KVH4) | 3b             | 1.3604                         | 1.3991 $\pm$ 0.2643 (n = 9)             | 35.05                             | 81.1508                        | 85.4056 $\pm$ 9.0801 (n = 9)            | 0.1880                           | 0.2421 $\pm$ 0.2241 (n = 9)               |
| Jug r 1.0101 (P93198) | 1              | 1.0721                         | 1.0490 $\pm$ 0.2574 (n = 3)             | 41.01                             | 80.4348                        | 90.9357 $\pm$ 1.7379 (n = 3)            | 0.1152                           | 0.0621 $\pm$ 0.0689 (n = 3)               |
| Jug r 2.0101 (Q9SEW4) | 2              | 1.2277                         | 0.9820 $\pm$ 0.4892 (n = 11)            | 51.71                             | 81.0811                        | 79.7509 $\pm$ 10.0932 (n = 11)          | 0.1923                           | 0.1571 $\pm$ 0.1423 (n = 11)              |
| Jug r 3 (C5H617)      | -              | 1.4369                         | No data                                 | No data                           | 66.1017                        | No data                                 | 0.2520                           | No data                                   |
| Jug r 4.0101 (Q2TPW5) | 3b             | 1.3668                         | 1.3844 $\pm$ 0.2803 (n = 14)            | 54.04                             | 81.0277                        | 79.8594 $\pm$ 9.7549 (n = 14)           | 0.2070                           | 0.2479 $\pm$ 0.1594 (n = 14)              |
| Pis v 1.0101 (B7P072) | 1              | 1.1409                         | No data                                 | No data                           | 76.3514                        | No data                                 | 0.1744                           | No data                                   |
| Pis v 2.0101 (B7P073) | 3b             | 1.2942                         | No data                                 | No data                           | 75.9596                        | No data                                 | 0.2398                           | No data                                   |
| Pis v 2.0201 (B7P074) | 3b             | 1.3178                         | No data                                 | No data                           | 75.7962                        | No data                                 | 0.2604                           | No data                                   |
| Pis v 3.0101 (B4X640) | 3a             | 1.3833                         | 1.6855 $\pm$ 0.2646 (n = 2)             | 7.51                              | 80.5019                        | 81.2866 $\pm$ 10.7514 (n = 2)           | 0.2506                           | 0.3790 $\pm$ 0.3127 (n = 2)               |
| Pis v 4.0101 (B2BDZ8) | -              | 1.4345                         | No data                                 | No data                           | 80.3493                        | No data                                 | 0.1867                           | No data                                   |
| Pis v 5.0101 (B7SLJ1) | 3b             | 1.2749                         | 1.4394 $\pm$ 0.1971 (n = 2)             | 8.25                              | 77.3305                        | 71.1111 $\pm$ 1.5713 (n = 2)            | 0.2008                           | 0.4248 $\pm$ 0.0054 (n = 2)               |
| Mean $\pm$ SD         |                | 1.2779 $\pm$ 0.1218            |                                         |                                   | 78.4252 $\pm$ 3.8609           |                                         | 0.2002 $\pm$ 0.0397              |                                           |

Table S4. Values of  $\Sigma A$ ,  $DH_t$  and  $\Sigma A_E$  parameters for all epitopes

| No | Set of domains | Fragment                                         | $\Sigma A$ | $DH_t$  | $\Sigma A_E$ |
|----|----------------|--------------------------------------------------|------------|---------|--------------|
| 1  | 3a             | 281-300 of Ana o 1.0101; 279-298 of Ana o 1.0102 | 2.1000     | 84.2105 | 0.7000       |
| 2  | 3a             | 257-276 of Pis v 3.0101                          | 1.9500     | 73.6842 | 0.6000       |
| 3  | 3a             | 335-349 of Ana o 1.0101; 333-347 of Ana o 1.0102 | 1.8002     | 78.5714 | 0.3334       |
| 4  | 3a             | 89-103 of Ana o 2.0101                           | 1.7334     | 64.2857 | 0.3335       |
| 5  | 3b             | 88-104 of Car i 4.0101                           | 1.7058     | 68.7500 | 0.5882       |
| 6  | 3b             | 378-400 of Car i 4.0101; 377-399 of Jug r 4.0101 | 1.6958     | 86.3636 | 0.3044       |
| 7  | 3b             | 233-247 of Jug r 4.0101                          | 1.6666     | 85.7143 | 0.2000       |
| 8  | 3a             | 55-86 of Ana o 2.0101                            | 1.6561     | 70.9677 | 0.3437       |
| 9  | 3b             | 417-439 of Jug r 4.0101                          | 1.6088     | 76.1905 | 0.0910       |
| 10 | 3b             | 105-119 of Jug r 4.0101                          | 1.6001     | 71.4286 | 0.4668       |
| 11 | 3a             | 514-533 of Ana o 1.0101; 512-531 of Ana o 1.0102 | 1.6000     | 94.7368 | 0.1000       |
| 12 | 3b             | 421-435 of Car i 4.0101                          | 1.6000     | 85.7143 | 0.2666       |
| 13 | 3b             | 89-103 of Jug r 4.0101                           | 1.6000     | 71.4286 | 0.5334       |
| 14 | 3a             | 431-452 of Ana o 1.0101; 429-450 of Ana o 1.0102 | 1.5911     | 66.6667 | 0.4547       |
| 15 | 3a             | 105-135 of Ana o 2.0101                          | 1.5808     | 90.0000 | 0.2582       |
| 16 | 3b             | 251-269 of Pis v 5.0101                          | 1.5788     | 72.2222 | 0.4210       |
| 17 | 3b             | 232-249 of Car i 4.0101                          | 1.5558     | 88.2353 | 0.1667       |
| 18 | 2              | 684-704 of Car i 2.0101                          | 1.5500     | 73.6842 | 0.2500       |
| 19 | 3b             | 145-159 of Jug r 4.0101                          | 1.5334     | 71.4286 | 0.4000       |
| 20 | 3b             | 465-479 of Jug r 4.0101                          | 1.5334     | 85.7143 | 0.0000       |
| 21 | 2              | 463-505 of Jug r 2.0101                          | 1.4885     | 80.9524 | 0.2093       |
| 22 | 2              | 302-345 of Jug r 2.0101                          | 1.4773     | 79.0698 | 0.3407       |
| 23 | 3a             | 137-151 of Ana o 2.0101                          | 1.4667     | 71.4286 | 0.2000       |
| 24 | 3b             | 1-15 of Jug r 4.0101                             | 1.4667     | 85.7143 | 0.3334       |
| 25 | 3a             | 257-351 of Ana o 2.0101                          | 1.4632     | 80.8511 | 0.2527       |
| 26 | 3b             | 106-144 of Car i 4.0101                          | 1.4613     | 81.5789 | 0.3074       |
| 27 | 2              | 414-457 of Jug r 2.0101                          | 1.4545     | 79.0698 | 0.2499       |
| 28 | 3b             | 266-288 of Car i 4.0101                          | 1.4349     | 76.1905 | 0.5457       |
| 29 | 3a             | 494-512 of Pis v 3.0101                          | 1.4209     | 88.8889 | 0.1579       |
| 30 | 2              | 610-637 of Car i 2.0101                          | 1.3928     | 77.7778 | 0.1428       |
| 31 | 2              | 206-265 of Jug r 2.0101                          | 1.3667     | 83.0508 | 0.2168       |
| 32 | 1              | 96-117 of Jug r 1.0101                           | 1.3637     | 90.4762 | 0.1364       |

|    |    |                                                  |         |          |         |
|----|----|--------------------------------------------------|---------|----------|---------|
| 33 | 3b | 121-143 of Jug r 4.0101                          | 1.3480  | 86.3636  | 0.2175  |
| 34 | 2  | 739-754 of Car i 2.0101                          | 1.3334  | 85.7143  | 0.3334  |
| 35 | 3b | 201-223 of Jug r 4.0101                          | 1.3045  | 95.4545  | 0.2175  |
| 36 | 2  | 382-401 of Jug r 2.0101                          | 1.3000  | 57.8947  | 0.1000  |
| 37 | 3b | 313-332 of Pis v 5.0101                          | 1.3000  | 70.0000  | 0.4285  |
| 38 | 3a | 393-455 of Ana o 2.0101                          | 1.2857  | 81.9672  | 0.1290  |
| 39 | 1  | 99-116 of Ana o 3.0101                           | 1.2779  | 88.2353  | 0.1112  |
| 40 | 3a | 407-421 of Ana o 1.0101; 405-419 of Ana o 1.0102 | 1.2668  | 71.4286  | 0.3333  |
| 41 | 3b | 303-327 of Jug r 4.0101                          | 1.2000  | 87.5000  | 0.0000  |
| 42 | 3a | 39-77 of Ana o 1.0101; 37-75 of Ana o 1.0102     | 1.1538  | 86.8421  | 0.0769  |
| 43 | 2  | 541-577 of Jug r 2.0101                          | 1.1622  | 75.0000  | 0.2432  |
| 44 | 2  | 522-541 of Car i 2.0101                          | 1.1500  | 84.2105  | 0.3000  |
| 45 | 3a | 215-255 of Ana o 2.0101                          | 1.1465  | 75.0000  | 0.2928  |
| 46 | 3b | 257-295 of Jug r 4.0101                          | 1.1281  | 84.2105  | 0.3331  |
| 47 | 3a | 1-48 of Ana o 2.0101                             | 1.1249  | 78.7234  | 0.1875  |
| 48 | 3a | 385-405 of Ana o 1.0101; 383-403 of Ana o 1.0102 | 1.0952  | 75.0000  | 0.0000  |
| 49 | 3b | 28-39 of Car i 4.0101                            | 1.0832  | 90.9091  | 0.0000  |
| 50 | 3b | 202-219 of Car i 4.0101                          | 1.0557  | 100.0000 | 0.0000  |
| 51 | 2  | 175-193 of Jug r 2.0101                          | 1.0525  | 77.7778  | 0.3683  |
| 52 | 1  | 41-60 of Jug r 1.0101                            | 1.0500  | 89.4737  | 0.0500  |
| 53 | 3b | 304-315 of Car i 4.0101                          | 1.0001  | 90.9091  | 0.0000  |
| 54 | 3a | 185-199 of Ana o 2.0101                          | 1.0000  | 85.7143  | 0.1334  |
| 55 | 3b | 57-71 of Jug r 4.0101                            | 1.0000  | 71.4286  | 0.2000  |
| 56 | 3a | 145-179 of Ana o 1.0101; 143-177 of Ana o 1.0102 | 0.8667  | 92.8571  | 0.2667  |
| 57 | 1  | 33-89 of Ana o 3.0101                            | 0.8420  | 80.3571  | 0.1053  |
| 58 | 1  | 68-82 of Car i 1.0101; 64-78 of Jug r 1.0101     | 0.7333  | 92.8571  | 0.0000  |
| 59 | 3b | 481-503 of Jug r 4.0101                          | 0.6957  | 59.0909  | 0.1740  |
| 60 | 2  | 101-110 of Jug r 2.0101                          | 0.6000  | 100.0000 | 0.0000  |
| 61 | 1  | 123-134 of Ana o 3.0101                          | 0.5833  | 36.3636  | 0.0000  |
| 62 | 2  | 272-281 of Car i 2.0101; 76-85 of Jug r 2.0101   | 0.5000  | 77.7778  | 0.0000  |
| 63 | 2  | 49-58 of Jug r 2.0101                            | 0.3000  | 88.8889  | 0.0000  |
| 64 | 2  | 336-345 of Car i 2.0101; 140-149 of Jug r 2.0101 | 0.1000  | 77.7778  | 0.0000  |
|    |    | Mean                                             | 1.2896  | 80.1683  | 0.2267  |
|    |    | SD                                               | ±0.3807 | ±10.6456 | ±0.1713 |

Table S5. Values of  $\Sigma A$ ,  $DH_t$  and  $\Sigma A_E$  scores of entire protein sequences and epitopes classified according to presence of sets of domains defined according to the InterPro database. Mean values with standard deviation are presented. Values denoted with the same letter as statistically significant at  $p < 0.05$

| No | Domains      | Entire proteins                                         |                                                 |                                                            | Epitopes                                                |                                      |                                                            |
|----|--------------|---------------------------------------------------------|-------------------------------------------------|------------------------------------------------------------|---------------------------------------------------------|--------------------------------------|------------------------------------------------------------|
|    |              | $\Sigma A$                                              | $DH_t$                                          | $\Sigma A_E$                                               | $\Sigma A$                                              | $DH_t$                               | $\Sigma A_E$                                               |
| 1. | Set 1        | 1.1013<br>$\pm 0.0290$<br>(n = 4) <sup>a, b, c, d</sup> | 77.7233<br>$\pm 1.8681$<br>(n = 4) <sup>e</sup> | 0.1544<br>$\pm 0.0278$<br>(n = 4) <sup>f, g, h, i, j</sup> | 0.9750<br>$\pm 0.3092$<br>(n = 6) <sup>k, l, m, n</sup> | 79.6272<br>$\pm 21.6151$<br>(n = 6)  | 0.0672<br>$\pm 0.0592$<br>(n = 6) <sup>j, o, p, r, s</sup> |
| 2  | Set 2        | 1.1960<br>$\pm 0.0448$<br>(n = 2)                       | 81.8807<br>$\pm 1.1307$<br>(n = 2) <sup>e</sup> | 0.1714<br>$\pm 0.0296$<br>(n = 2)                          | 1.0819<br>$\pm 0.4726$<br>(n = 15) <sup>o, p, r</sup>   | 79.9098<br>$\pm 8.9223$<br>(n = 15)  | 0.1836<br>$\pm 0.1343$<br>(n = 15) <sup>o</sup>            |
| 3  | Set 3a       | 1.3605<br>$\pm 0.0134$<br>(n = 4) <sup>a</sup>          | 80.2146<br>$\pm 1.1748$<br>(n = 4)              | 0.2271<br>$\pm 0.0169$<br>(n = 4) <sup>f</sup>             | 1.4369<br>$\pm 0.3325$<br>(n = 19) <sup>k, o</sup>      | 79.5697<br>$\pm 8.8398$<br>(n = 19)  | 0.2712<br>$\pm 0.1745$<br>(n = 19) <sup>p</sup>            |
| 4  | Set 3b       | 1.3228<br>$\pm 0.0403$<br>(n = 5) <sup>b</sup>          | 78.2530<br>$\pm 2.6572$<br>(n = 5)              | 0.2192<br>$\pm 0.0299$<br>(n = 5) <sup>g</sup>             | 1.3815<br>$\pm 0.2702$<br>(n = 24) <sup>l, p</sup>      | 80.9392<br>$\pm 9.9099$<br>(n = 24)  | 0.2581<br>$\pm 0.1852$<br>(n = 24) <sup>r</sup>            |
| 5  | Set 3        | 1.3396<br>$\pm 0.0368$<br>(n = 9) <sup>c</sup>          | 79.1248<br>$\pm 2.2620$<br>(n = 9)              | 0.2227<br>$\pm 0.0239$<br>(n = 9) <sup>h</sup>             | 1.4060<br>$\pm 0.2969$<br>(n = 43) <sup>m, r</sup>      | 80.3341<br>$\pm 9.3671$<br>(n = 43)  | 0.2639<br>$\pm 0.1786$<br>(n = 43)                         |
| 6  | Set 2 + 3    | 1.3135<br>$\pm 0.0682$<br>(n = 11) <sup>d</sup>         | 79.6259<br>$\pm 2.3375$<br>(n = 11)             | 0.2134<br>$\pm 0.0313$<br>(n = 11) <sup>i</sup>            | 1.3222<br>$\pm 0.4049$<br>(n = 58) <sup>n</sup>         | 80.2243<br>$\pm 9.1782$<br>(n = 58)  | 0.2432<br>$\pm 0.1708$<br>(n = 58) <sup>s</sup>            |
|    | All proteins | 1.2779<br>$\pm 0.1218$<br>(n = 17)                      | 78.4252<br>$\pm 3.8609$<br>(n = 17)             | 0.2002<br>$\pm 0.0397$<br>(n = 17)                         | 1.2896<br>$\pm 0.3807$<br>(n = 64)                      | 80.1683<br>$\pm 10.6456$<br>(n = 64) | 0.2267<br>$\pm 0.1713$<br>(n = 64)                         |

Table S6. Profile of potential biological activity of fragments of protein Ana o 1.0101.

| ID   | Name of peptide                          | Activity      | Number | Sequence | Location                                          |
|------|------------------------------------------|---------------|--------|----------|---------------------------------------------------|
| 3458 | Prolyl endopeptidase inhibitor           | antiamnestic  | 1      | GPGG     | [281-284]                                         |
| 3460 | Prolyl endopeptidase inhibitor           | antiamnestic  | 2      | PG       | [273-274],[282-283]                               |
| 3461 | Prolyl endopeptidase inhibitor           | antiamnestic  | 4      | GP       | [2-3],[281-282],[339-340],[525-526]               |
| 3257 | beta-lactokinin                          | ACE inhibitor | 1      | RL       | [191-192]                                         |
| 3258 | beta-lactokinin                          | ACE inhibitor | 3      | IR       | [330-331],[443-444],[480-481]                     |
| 3377 | ACE inhibitor (from bovine as1-CN)       | ACE inhibitor | 1      | FGK      | [514-516]                                         |
| 3380 | ACE inhibitor                            | ACE inhibitor | 2      | RY       | [122-123],[481-482]                               |
| 3381 | ACE inhibitor                            | ACE inhibitor | 1      | LY       | [261-262]                                         |
| 3384 | ACE inhibitor                            | ACE inhibitor | 4      | VF       | [154-155],[278-279],[448-449],[513-514]           |
| 3421 | ACE inhibitor                            | ACE inhibitor | 1      | LVL      | [17-19]                                           |
| 3489 | ACE inhibitor from sake lees             | ACE inhibitor | 1      | RF       | [116-117]                                         |
| 3543 | ACE inhibitor                            | ACE inhibitor | 1      | LRP      | [267-269]                                         |
| 3547 | ACE inhibitor                            | ACE inhibitor | 1      | IRA      | [330-332]                                         |
| 3551 | ACE inhibitor (from bovine beta-Lg)      | ACE inhibitor | 4      | LF       | [11-12],[313-314],[355-356],[369-370]             |
| 3553 | ACE inhibitor                            | ACE inhibitor | 1      | YG       | [366-367]                                         |
| 3556 | ACE inhibitor                            | ACE inhibitor | 3      | FY       | [250-251],[290-291],[401-402]                     |
| 3666 | ACE inhibitor                            | ACE inhibitor | 1      | YP       | [377-378]                                         |
| 3713 | ACE inhibitor from alpha-zein            | ACE inhibitor | 1      | LLP      | [173-175]                                         |
| 7511 | ACE inhibitor from Alaskan 14embran skin | ACE inhibitor | 1      | LPG      | [272-274]                                         |
| 7512 | ACE inhibitor from Alaskan 14embran skin | ACE inhibitor | 4      | GP       | [2-3],[281-282],[339-340],[525-526]               |
| 7513 | ACE inhibitor from Alaskan 14embran skin | ACE inhibitor | 1      | PL       | [379-380]                                         |
| 7544 | ACE inhibitor                            | ACE inhibitor | 1      | IW       | [342-343]                                         |
| 7558 | ACE inhibitor from buckwheat             | ACE inhibitor | 2      | VK       | [54-55],[164-165]                                 |
| 7559 | ACE inhibitor from buckwheat             | ACE inhibitor | 1      | PSY      | [434-436]                                         |
| 7562 | ACE inhibitor from soy hydrolysate       | ACE inhibitor | 3      | IA       | [252-253],[409-410],[421-422]                     |
| 7582 | ACE inhibitor                            | ACE inhibitor | 1      | RP       | [268-269]                                         |
| 7583 | ACE inhibitor                            | ACE inhibitor | 3      | AF       | [201-202],[293-294],[502-503]                     |
| 7585 | ACE inhibitor                            | ACE inhibitor | 4      | LA       | [25-26],[192-193],[484-485],[501-502]             |
| 7586 | ACE inhibitor                            | ACE inhibitor | 2      | KR       | [133-134],[230-231]                               |
| 7587 | ACE inhibitor                            | ACE inhibitor | 3      | VP       | [204-205],[399-400],[451-452]                     |
| 7588 | ACE inhibitor                            | ACE inhibitor | 5      | RA       | [292-293],[331-332],[405-406],[440-441],[535-536] |
| 7589 | ACE inhibitor                            | ACE inhibitor | 1      | YA       | [389-390]                                         |
| 7590 | ACE inhibitor                            | ACE inhibitor | 1      | AA       | [301-302]                                         |

|      |                                     |               |   |     |                                                             |
|------|-------------------------------------|---------------|---|-----|-------------------------------------------------------------|
| 7591 | ACE inhibitor                       | ACE inhibitor | 1 | GF  | [22-23]                                                     |
| 7592 | ACE inhibitor                       | ACE inhibitor | 1 | FR  | [117-118]                                                   |
| 7593 | ACE inhibitor                       | ACE inhibitor | 1 | IF  | [213-214]                                                   |
| 7597 | ACE inhibitor                       | ACE inhibitor | 1 | GM  | [396-397]                                                   |
| 7600 | ACE inhibitor                       | ACE inhibitor | 2 | AG  | [453-454],[485-486]                                         |
| 7601 | ACE inhibitor                       | ACE inhibitor | 2 | GH  | [274-275],[454-455]                                         |
| 7602 | ACE inhibitor                       | ACE inhibitor | 2 | HL  | [95-96],[425-426]                                           |
| 7603 | ACE inhibitor                       | ACE inhibitor | 3 | GR  | [66-67],[219-220],[534-535]                                 |
| 7604 | ACE inhibitor                       | ACE inhibitor | 2 | KG  | [65-66],[394-395]                                           |
| 7605 | ACE inhibitor                       | ACE inhibitor | 1 | FG  | [514-515]                                                   |
| 7606 | ACE inhibitor                       | ACE inhibitor | 1 | DA  | [209-210]                                                   |
| 7607 | ACE inhibitor                       | ACE inhibitor | 1 | GS  | [351-352]                                                   |
| 7608 | ACE inhibitor                       | ACE inhibitor | 1 | GV  | [82-83]                                                     |
| 7609 | ACE inhibitor                       | ACE inhibitor | 1 | MG  | [1-2]                                                       |
| 7610 | ACE inhibitor                       | ACE inhibitor | 3 | GQ  | [109-110],[128-129],[367-368]                               |
| 7611 | ACE inhibitor                       | ACE inhibitor | 3 | GK  | [169-170],[486-487],[515-516]                               |
| 7612 | ACE inhibitor                       | ACE inhibitor | 4 | GT  | [79-80],[221-222],[247-248],[320-321]                       |
| 7613 | ACE inhibitor                       | ACE inhibitor | 2 | WG  | [78-79],[218-219]                                           |
| 7614 | ACE inhibitor                       | ACE inhibitor | 1 | HG  | [280-281]                                                   |
| 7615 | ACE inhibitor                       | ACE inhibitor | 4 | GE  | [284-285],[337-338],[415-416],[507-508]                     |
| 7616 | ACE inhibitor                       | ACE inhibitor | 4 | GG  | [81-82],[108-109],[283-284],[395-396]                       |
| 7617 | ACE inhibitor                       | ACE inhibitor | 4 | QG  | [168-169],[238-239],[319-320],[524-525]                     |
| 7618 | ACE inhibitor                       | ACE inhibitor | 3 | SG  | [246-247],[414-415],[462-463]                               |
| 7619 | ACE inhibitor                       | ACE inhibitor | 1 | LG  | [21-22]                                                     |
| 7620 | ACE inhibitor                       | ACE inhibitor | 1 | GD  | [239-240]                                                   |
| 7621 | ACE inhibitor                       | ACE inhibitor | 2 | TG  | [80-81],[350-351]                                           |
| 7622 | ACE inhibitor                       | ACE inhibitor | 6 | EG  | [107-108],[338-339],[416-417],[477-478],[506-507],[533-534] |
| 7623 | ACE inhibitor                       | ACE inhibitor | 4 | EA  | [144-145],[300-301],[371-372],[497-498]                     |
| 7625 | ACE inhibitor                       | ACE inhibitor | 2 | PG  | [273-274],[282-283]                                         |
| 7628 | ACE inhibitor from k-CN (fr. 67-68) | ACE inhibitor | 1 | VR  | [236-237]                                                   |
| 7636 | ACE inhibitor from k-CN (fr. 78-80) | ACE inhibitor | 1 | SHP | [432-434]                                                   |
| 7637 | ACE inhibitor from bonito bowels    | ACE inhibitor | 1 | GHF | [274-276]                                                   |
| 7653 | ACE inhibitor from wakame           | ACE inhibitor | 1 | KYY | [59-61]                                                     |
| 7680 | ACE inhibitor from pea vicilin      | ACE inhibitor | 3 | QK  | [49-50],[111-112],[179-180]                                 |
| 7682 | ACE inhibitor from 15embra          | ACE inhibitor | 1 | NY  | [131-132]                                                   |
| 7684 | ACE inhibitor from 15embra          | ACE inhibitor | 2 | SY  | [388-389],[435-436]                                         |

|      |                                           |               |    |     |                                                                                               |
|------|-------------------------------------------|---------------|----|-----|-----------------------------------------------------------------------------------------------|
| 7685 | ACE inhibitor                             | ACE inhibitor | 3  | SF  | [8-9],[289-290],[352-353]                                                                     |
| 7691 | ACE inhibitor from wakame                 | ACE inhibitor | 3  | KY  | [59-60],[189-190],[365-366]                                                                   |
| 7692 | ACE inhibitor                             | ACE inhibitor | 2  | KF  | [6-7],[176-177]                                                                               |
| 7693 | ACE inhibitor from wakame                 | ACE inhibitor | 6  | KL  | [182-183],[260-261],[312-313],[354-355],[382-383],[438-439]                                   |
| 7697 | ACE inhibitor from wakame                 | ACE inhibitor | 4  | YK  | [61-62],[123-124],[132-133],[436-437]                                                         |
| 7698 | ACE inhibitor from wakame                 | ACE inhibitor | 2  | NK  | [229-230],[364-365]                                                                           |
| 7741 | ACE inhibitor                             | ACE inhibitor | 1  | RR  | [335-336]                                                                                     |
| 7742 | ACE inhibitor                             | ACE inhibitor | 1  | AR  | [441-442]                                                                                     |
| 7743 | ACE inhibitor                             | ACE inhibitor | 1  | KA  | [324-325]                                                                                     |
| 7751 | ACE inhibitor from shark meat hydrolysate | ACE inhibitor | 1  | CF  | [471-472]                                                                                     |
| 7820 | ACE inhibitor from wheat gliadin          | ACE inhibitor | 1  | GPP | [2-4]                                                                                         |
| 7823 | ACE inhibitor from micro algae            | ACE inhibitor | 1  | FAL | [23-25]                                                                                       |
| 7826 | ACE inhibitor                             | ACE inhibitor | 3  | EI  | [297-298],[420-421],[468-469]                                                                 |
| 7828 | ACE inhibitor                             | ACE inhibitor | 3  | EV  | [277-278],[473-474],[509-510]                                                                 |
| 7829 | ACE inhibitor                             | ACE inhibitor | 1  | VE  | [419-420]                                                                                     |
| 7830 | ACE inhibitor                             | ACE inhibitor | 2  | TE  | [166-167],[346-347]                                                                           |
| 7833 | ACE inhibitor                             | ACE inhibitor | 1  | PT  | [4-5]                                                                                         |
| 7834 | ACE inhibitor                             | ACE inhibitor | 1  | TQ  | [178-179]                                                                                     |
| 7836 | ACE inhibitor                             | ACE inhibitor | 2  | PP  | [3-4],[378-379]                                                                               |
| 7837 | ACE inhibitor                             | ACE inhibitor | 1  | PQ  | [199-200]                                                                                     |
| 7838 | ACE inhibitor                             | ACE inhibitor | 2  | EW  | [77-78],[527-528]                                                                             |
| 7839 | ACE inhibitor                             | ACE inhibitor | 2  | ME  | [494-495],[505-506]                                                                           |
| 7840 | ACE inhibitor                             | ACE inhibitor | 10 | EK  | [58-59],[63-64],[93-94],[188-189],[259-260],[311-312],[315-316],[381-382],[495-496],[531-532] |
| 7841 | ACE inhibitor                             | ACE inhibitor | 9  | KE  | [50-51],[55-56],[62-63],[125-126],[327-328],[496-497],[499-500],[530-531],[532-533]           |
| 7842 | ACE inhibitor                             | ACE inhibitor | 2  | HP  | [433-434],[455-456]                                                                           |
| 7843 | ACE inhibitor                             | ACE inhibitor | 1  | PH  | [424-425]                                                                                     |
| 8193 | ACE inhibitor                             | ACE inhibitor | 1  | AI  | [410-411]                                                                                     |
| 8951 | ACE inhibitor                             | ACE inhibitor | 1  | AV  | [193-194]                                                                                     |
| 9037 | ACE inhibitor                             | ACE inhibitor | 1  | GKV | [169-171]                                                                                     |
| 9048 | ACE inhibitor                             | ACE inhibitor | 1  | LVQ | [263-265]                                                                                     |
| 9053 | ACE inhibitor                             | ACE inhibitor | 1  | FYN | [401-403]                                                                                     |
| 9060 | ACE inhibitor                             | ACE inhibitor | 1  | AVL | [193-195]                                                                                     |
| 9064 | ACE inhibitor                             | ACE inhibitor | 3  | LEK | [187-189],[310-312],[380-382]                                                                 |
| 9072 | ACE inhibitor                             | ACE inhibitor | 1  | DY  | [376-377]                                                                                     |



|      |                                                           |                   |    |      |                                                                                           |
|------|-----------------------------------------------------------|-------------------|----|------|-------------------------------------------------------------------------------------------|
| 9073 | ACE inhibitor                                             | ACE inhibitor     | 1  | TP   | [248-249]                                                                                 |
| 9074 | ACE inhibitor                                             | ACE inhibitor     | 1  | DF   | [159-160]                                                                                 |
| 9075 | ACE inhibitor                                             | ACE inhibitor     | 1  | DM   | [384-385]                                                                                 |
| 9076 | ACE inhibitor                                             | ACE inhibitor     | 1  | FQ   | [523-524]                                                                                 |
| 9077 | ACE inhibitor                                             | ACE inhibitor     | 1  | YV   | [153-154]                                                                                 |
| 9079 | ACE inhibitor                                             | ACE inhibitor     | 2  | IL   | [226-227],[298-299]                                                                       |
| 9142 | ACE inhibitor                                             | ACE inhibitor     | 1  | MGP  | [1-3]                                                                                     |
| 9146 | ACE inhibitor                                             | ACE inhibitor     | 1  | QGP  | [524-526]                                                                                 |
| 9173 | ACE inhibitor                                             | ACE inhibitor     | 3  | RG   | [127-128],[220-221],[336-337]                                                             |
| 9183 | ACE inhibitor                                             | ACE inhibitor     | 1  | GTG  | [79-81]                                                                                   |
| 9184 | ACE inhibitor                                             | ACE inhibitor     | 2  | ST   | [87-88],[349-350]                                                                         |
| 9185 | ACE inhibitor                                             | ACE inhibitor     | 1  | YN   | [402-403]                                                                                 |
| 9213 | ACE inhibitor                                             | ACE inhibitor     | 2  | LR   | [267-268],[439-440]                                                                       |
| 9731 | ACE inhibitor                                             | ACE inhibitor     | 1  | VVL  | [171-173]                                                                                 |
| 3283 | Antithrombotic peptide                                    | antithrombotic    | 4  | GP   | [2-3],[281-282],[339-340],[525-526]                                                       |
| 3285 | Antithrombotic peptide                                    | antithrombotic    | 2  | PG   | [273-274],[282-283]                                                                       |
| 3354 | Antithrombotic peptide                                    | antithrombotic    | 1  | DEE  | [518-520]                                                                                 |
| 3462 |                                                           | antithrombotic    | 1  | GPGG | [281-284]                                                                                 |
| 2882 | Immunostimulating peptide                                 | immunomodulating  | 1  | YG   | [366-367]                                                                                 |
| 3351 | Stimulating vasoactive substance release                  | stimulating       | 5  | EEE  | [72-74],[73-75],[74-76],[75-77],[146-148]                                                 |
| 3355 | Stimulating vasoactive substance release                  | stimulating       | 1  | SSS  | [427-429]                                                                                 |
| 8320 | Glucose uptake stimulating peptide                        | stimulating       | 4  | VL   | [16-17],[18-19],[172-173],[194-195]                                                       |
| 8321 | Glucose uptake stimulating peptide                        | stimulating       | 4  | LV   | [13-14],[17-18],[195-196],[263-264]                                                       |
| 8322 | Glucose uptake stimulating peptide                        | stimulating       | 4  | IV   | [241-242],[411-412],[450-451],[469-470]                                                   |
| 8323 | Glucose uptake stimulating peptide                        | stimulating       | 2  | IL   | [226-227],[298-299]                                                                       |
| 8325 | Glucose uptake stimulating peptide                        | stimulating       | 1  | II   | [490-491]                                                                                 |
| 8326 | Glucose uptake stimulating peptide                        | stimulating       | 2  | LL   | [173-174],[183-184]                                                                       |
| 8329 | Stimulating vasoactive substance release                  | stimulating       | 10 | EE   | [72-73],[73-74],[74-75],[75-76],[76-77],[146-147],[147-148],[347-348],[508-509],[519-520] |
| 3066 | Immunostimulating peptide                                 | immunostimulating | 2  | EAE  | [144-146],[371-373]                                                                       |
| 2890 | neuropeptide                                              | neuropeptide      | 3  | GQ   | [109-110],[128-129],[367-368]                                                             |
| 8310 | Anxiolytic peptide                                        | neuropeptide      | 1  | YL   | [262-263]                                                                                 |
| 9534 | Kyotorphin                                                | neuropeptide      | 2  | YR   | [190-191],[291-292]                                                                       |
| 2749 | peptide regulating ion flow                               | regulating        | 1  | DY   | [376-377]                                                                                 |
| 2753 | peptide regulating the stomach mucosal 17embranę activity | regulating        | 4  | GP   | [2-3],[281-282],[339-340],[525-526]                                                       |
| 2754 | peptide regulating the stomach mucosal 17embranę activity | regulating        | 2  | PG   | [273-274],[282-283]                                                                       |

|      |                                                                                   |                                           |   |      |                                                   |
|------|-----------------------------------------------------------------------------------|-------------------------------------------|---|------|---------------------------------------------------|
| 2755 | peptide regulating the stomach mucosal membrane activity                          | regulating                                | 1 | GPGG | [281-284]                                         |
| 3305 |                                                                                   | antioxidative                             | 1 | LH   | [184-185]                                         |
| 3317 |                                                                                   | antioxidative                             | 2 | HL   | [95-96],[425-426]                                 |
| 7863 | peptide from prawn muscle ( <i>Penaeus japonicus</i> )                            | antioxidative                             | 1 | FKK  | [356-358]                                         |
| 7872 | peptide from soybean protein isolates: beta-conglycinin and glycinin              | antioxidative                             | 1 | LY   | [261-262]                                         |
| 7888 | antioxidative peptide                                                             | antioxidative                             | 2 | EL   | [31-32],[500-501]                                 |
| 7931 | synthetic peptide                                                                 | antioxidative                             | 1 | KYY  | [59-61]                                           |
| 7937 | synthetic peptide                                                                 | antioxidative                             | 1 | YYK  | [60-62]                                           |
| 7988 | synthetic peptide                                                                 | antioxidative                             | 1 | LHA  | [184-186]                                         |
| 8029 | synthetic peptide                                                                 | antioxidative                             | 1 | PHL  | [424-426]                                         |
| 8114 | peptide derived from sardinelle by-products proteins ( <i>Sardinella aurita</i> ) | antioxidative                             | 1 | GGE  | [283-285]                                         |
| 8130 | peptide derived from dried bonito                                                 | antioxidative                             | 1 | EAK  | [497-499]                                         |
| 8134 | peptide derived from dried bonito                                                 | antioxidative                             | 3 | KD   | [307-308],[358-359],[445-446]                     |
| 8139 | synthetic peptide                                                                 | antioxidative                             | 1 | PEL  | [30-32]                                           |
| 8215 | Antioxidative peptide                                                             | antioxidative                             | 3 | IR   | [330-331],[443-444],[480-481]                     |
| 8217 | Antioxidative peptide                                                             | antioxidative                             | 2 | LK   | [32-33],[303-304]                                 |
| 8987 | Antioxidative peptide                                                             | antioxidative                             | 1 | GPP  | [2-4]                                             |
| 9082 | Antioxidative peptide                                                             | antioxidative                             | 2 | WG   | [78-79],[218-219]                                 |
| 9363 | Antioxidative peptide                                                             | antioxidative                             | 1 | NEN  | [464-466]                                         |
| 9368 | Antioxidative peptide                                                             | antioxidative                             | 1 | EQC  | [51-53]                                           |
| 3751 |                                                                                   | bacterial permease ligand                 | 5 | KK   | [64-65],[124-125],[357-358],[437-438],[487-488]   |
| 4005 |                                                                                   | activating ubiquitin-mediated proteolysis | 5 | RA   | [292-293],[331-332],[405-406],[440-441],[535-536] |
| 4006 | Ubiquitin-mediated proteolysis activating peptide                                 | activating ubiquitin-mediated proteolysis | 4 | LA   | [25-26],[192-193],[484-485],[501-502]             |
| 9580 | Hypolipidemic peptide                                                             | hypolipidemic                             | 1 | EF   | [520-521]                                         |
| 9548 | Alpha-glucosidase inhibitor                                                       | alpha-glucosidase inhibitor               | 1 | YP   | [377-378]                                         |
| 9650 | Alpha-glucosidase inhibitor                                                       | alpha-glucosidase inhibitor               | 4 | EA   | [144-145],[300-301],[371-372],[497-498]           |
| 9651 | Alpha-glucosidase inhibitor                                                       | alpha-glucosidase inhibitor               | 2 | PP   | [3-4],[378-379]                                   |
| 9693 | Alpha-glucosidase inhibitor                                                       | alpha-glucosidase inhibitor               | 1 | VE   | [419-420]                                         |
| 9694 | Alpha-glucosidase inhibitor                                                       | alpha-glucosidase inhibitor               | 3 | PE   | [30-31],[287-288],[526-527]                       |
| 9695 | Alpha-glucosidase inhibitor                                                       | alpha-glucosidase inhibitor               | 2 | AD   | [210-211],[536-537]                               |
| 9383 | HMG-CoA reductase inhibitor                                                       | HMG-CoA reductase inhibitor               | 1 | GGV  | [81-83]                                           |
| 3169 | dipeptidyl peptidase IV inhibitor (DPP IV inhibitor)                              | dipeptidyl peptidase IV inhibitor         | 4 | GP   | [2-3],[281-282],[339-340],[525-526]               |
| 3170 | dipeptidyl peptidase IV inhibitor (DPP IV inhibitor)                              | dipeptidyl peptidase IV inhibitor         | 2 | PP   | [3-4],[378-379]                                   |

|      |                                                      |                                   |    |     |                                                                                               |
|------|------------------------------------------------------|-----------------------------------|----|-----|-----------------------------------------------------------------------------------------------|
| 3172 | dipeptidyl peptidase IV inhibitor (DPP IV inhibitor) | dipeptidyl peptidase IV inhibitor | 2  | VA  | [196-197],[460-461]                                                                           |
| 3174 | dipeptidyl peptidase IV inhibitor (DPP IV inhibitor) | dipeptidyl peptidase IV inhibitor | 1  | KA  | [324-325]                                                                                     |
| 3175 | dipeptidyl peptidase IV inhibitor (DPP IV inhibitor) | dipeptidyl peptidase IV inhibitor | 4  | LA  | [25-26],[192-193],[484-485],[501-502]                                                         |
| 3176 | dipeptidyl peptidase IV inhibitor (DPP IV inhibitor) | dipeptidyl peptidase IV inhibitor | 2  | FA  | [23-24],[457-458]                                                                             |
| 3179 | dipeptidyl peptidase IV inhibitor (DPP IV inhibitor) | dipeptidyl peptidase IV inhibitor | 2  | PA  | [91-92],[452-453]                                                                             |
| 3180 | dipeptidyl peptidase IV inhibitor (DPP IV inhibitor) | dipeptidyl peptidase IV inhibitor | 2  | LP  | [174-175],[272-273]                                                                           |
| 3181 | dipeptidyl peptidase IV inhibitor (DPP IV inhibitor) | dipeptidyl peptidase IV inhibitor | 3  | VP  | [204-205],[399-400],[451-452]                                                                 |
| 3182 | dipeptidyl peptidase IV inhibitor (DPP IV inhibitor) | dipeptidyl peptidase IV inhibitor | 2  | LL  | [173-174],[183-184]                                                                           |
| 3183 | dipeptidyl peptidase IV inhibitor (DPP IV inhibitor) | dipeptidyl peptidase IV inhibitor | 4  | VV  | [171-172],[203-204],[386-387],[412-413]                                                       |
| 3184 | dipeptidyl peptidase IV inhibitor (DPP IV inhibitor) | dipeptidyl peptidase IV inhibitor | 1  | HA  | [185-186]                                                                                     |
| 8503 | Dipeptidyl peptidase IV inhibitor (DPP IV inhibitor) | dipeptidyl peptidase IV inhibitor | 1  | TP  | [248-249]                                                                                     |
| 8504 | Dipeptidyl peptidase IV inhibitor (DPP IV inhibitor) | dipeptidyl peptidase IV inhibitor | 1  | WP  | [343-344]                                                                                     |
| 8518 | dipeptidyl peptidase IV inhibitor (DPP IV inhibitor) | dipeptidyl peptidase IV inhibitor | 1  | RP  | [268-269]                                                                                     |
| 8520 | dipeptidyl peptidase IV inhibitor (DPP IV inhibitor) | dipeptidyl peptidase IV inhibitor | 2  | HP  | [433-434],[455-456]                                                                           |
| 8521 | dipeptidyl peptidase IV inhibitor (DPP IV inhibitor) | dipeptidyl peptidase IV inhibitor | 1  | YP  | [377-378]                                                                                     |
| 8525 | dipeptidyl peptidase IV inhibitor (DPP IV inhibitor) | dipeptidyl peptidase IV inhibitor | 3  | IA  | [252-253],[409-410],[421-422]                                                                 |
| 8526 | dipeptidyl peptidase IV inhibitor (DPP IV inhibitor) | dipeptidyl peptidase IV inhibitor | 5  | RA  | [292-293],[331-332],[405-406],[440-441],[535-536]                                             |
| 8529 | dipeptidyl peptidase IV inhibitor (DPP IV inhibitor) | dipeptidyl peptidase IV inhibitor | 2  | EP  | [85-86],[90-91]                                                                               |
| 8530 | dipeptidyl peptidase IV inhibitor (DPP IV inhibitor) | dipeptidyl peptidase IV inhibitor | 3  | AL  | [151-152],[198-199],[286-287]                                                                 |
| 8555 | dipeptidyl peptidase IV inhibitor (DPP IV inhibitor) | dipeptidyl peptidase IV inhibitor | 2  | FL  | [12-13],[266-267]                                                                             |
| 8557 | dipeptidyl peptidase IV inhibitor (DPP IV inhibitor) | dipeptidyl peptidase IV inhibitor | 2  | HL  | [95-96],[425-426]                                                                             |
| 8558 | dipeptidyl peptidase IV inhibitor (DPP IV inhibitor) | dipeptidyl peptidase IV inhibitor | 10 | EK  | [58-59],[63-64],[93-94],[188-189],[259-260],[311-312],[315-316],[381-382],[495-496],[531-532] |
| 8559 | dipeptidyl peptidase IV inhibitor (DPP IV inhibitor) | dipeptidyl peptidase IV inhibitor | 3  | AL  | [24-25],[186-187],[302-303]                                                                   |
| 8560 | dipeptidyl peptidase IV inhibitor (DPP IV inhibitor) | dipeptidyl peptidase IV inhibitor | 1  | SL  | [10-11]                                                                                       |
| 8594 | dipeptidyl peptidase IV inhibitor (DPP IV inhibitor) | dipeptidyl peptidase IV inhibitor | 1  | VR  | [236-237]                                                                                     |
| 8598 | dipeptidyl peptidase IV inhibitor (DPP IV inhibitor) | dipeptidyl peptidase IV inhibitor | 1  | WRK | [528-530]                                                                                     |
| 8637 | dipeptidyl peptidase IV inhibitor (DPP IV inhibitor) | dipeptidyl peptidase IV inhibitor | 1  | AA  | [301-302]                                                                                     |
| 8638 | dipeptidyl peptidase IV inhibitor (DPP IV inhibitor) | dipeptidyl peptidase IV inhibitor | 1  | PL  | [379-380]                                                                                     |
| 8652 | dipeptidyl peptidase IV inhibitor (DPP IV inhibitor) | dipeptidyl peptidase IV inhibitor | 1  | PPL | [378-380]                                                                                     |
| 8675 | dipeptidyl peptidase IV inhibitor (DPP IV inhibitor) | dipeptidyl peptidase IV inhibitor | 1  | WR  | [528-529]                                                                                     |
| 8691 | dipeptidyl peptidase IV inhibitor (DPP IV inhibitor) | dipeptidyl peptidase IV inhibitor | 1  | WE  | [296-297]                                                                                     |
| 8696 | dipeptidyl peptidase IV inhibitor (DPP IV inhibitor) | dipeptidyl peptidase IV inhibitor | 1  | YT  | [482-483]                                                                                     |
| 8697 | dipeptidyl peptidase IV inhibitor (DPP IV inhibitor) | dipeptidyl peptidase IV inhibitor | 2  | WG  | [78-79],[218-219]                                                                             |
| 8757 | dipeptidyl peptidase IV inhibitor (DPP IV inhibitor) | dipeptidyl peptidase IV inhibitor | 2  | AD  | [210-211],[536-537]                                                                           |
| 8758 | dipeptidyl peptidase IV inhibitor (DPP IV inhibitor) | dipeptidyl peptidase IV inhibitor | 4  | AE  | [92-93],[145-146],[372-373],[476-477]                                                         |

|      |                                                      |                                   |   |    |                                                                                     |
|------|------------------------------------------------------|-----------------------------------|---|----|-------------------------------------------------------------------------------------|
| 8759 | dipeptidyl peptidase IV inhibitor (DPP IV inhibitor) | dipeptidyl peptidase IV inhibitor | 3 | AF | [201-202],[293-294],[502-503]                                                       |
| 8760 | dipeptidyl peptidase IV inhibitor (DPP IV inhibitor) | dipeptidyl peptidase IV inhibitor | 2 | AG | [453-454],[485-486]                                                                 |
| 8762 | dipeptidyl peptidase IV inhibitor (DPP IV inhibitor) | dipeptidyl peptidase IV inhibitor | 2 | AS | [325-326],[461-462]                                                                 |
| 8763 | dipeptidyl peptidase IV inhibitor (DPP IV inhibitor) | dipeptidyl peptidase IV inhibitor | 2 | AT | [406-407],[458-459]                                                                 |
| 8764 | dipeptidyl peptidase IV inhibitor (DPP IV inhibitor) | dipeptidyl peptidase IV inhibitor | 1 | AV | [193-194]                                                                           |
| 8767 | dipeptidyl peptidase IV inhibitor (DPP IV inhibitor) | dipeptidyl peptidase IV inhibitor | 2 | DP | [29-30],[359-360]                                                                   |
| 8768 | dipeptidyl peptidase IV inhibitor (DPP IV inhibitor) | dipeptidyl peptidase IV inhibitor | 1 | DQ | [318-319]                                                                           |
| 8770 | dipeptidyl peptidase IV inhibitor (DPP IV inhibitor) | dipeptidyl peptidase IV inhibitor | 6 | EG | [107-108],[338-339],[416-417],[477-478],[506-507],[533-534]                         |
| 8771 | dipeptidyl peptidase IV inhibitor (DPP IV inhibitor) | dipeptidyl peptidase IV inhibitor | 1 | EH | [70-71]                                                                             |
| 8772 | dipeptidyl peptidase IV inhibitor (DPP IV inhibitor) | dipeptidyl peptidase IV inhibitor | 3 | EI | [297-298],[420-421],[468-469]                                                       |
| 8773 | dipeptidyl peptidase IV inhibitor (DPP IV inhibitor) | dipeptidyl peptidase IV inhibitor | 3 | ES | [232-233],[288-289],[348-349]                                                       |
| 8775 | dipeptidyl peptidase IV inhibitor (DPP IV inhibitor) | dipeptidyl peptidase IV inhibitor | 3 | EV | [277-278],[473-474],[509-510]                                                       |
| 8776 | dipeptidyl peptidase IV inhibitor (DPP IV inhibitor) | dipeptidyl peptidase IV inhibitor | 2 | EW | [77-78],[527-528]                                                                   |
| 8779 | dipeptidyl peptidase IV inhibitor (DPP IV inhibitor) | dipeptidyl peptidase IV inhibitor | 1 | FQ | [523-524]                                                                           |
| 8780 | dipeptidyl peptidase IV inhibitor (DPP IV inhibitor) | dipeptidyl peptidase IV inhibitor | 1 | FR | [117-118]                                                                           |
| 8781 | dipeptidyl peptidase IV inhibitor (DPP IV inhibitor) | dipeptidyl peptidase IV inhibitor | 4 | GE | [284-285],[337-338],[415-416],[507-508]                                             |
| 8782 | dipeptidyl peptidase IV inhibitor (DPP IV inhibitor) | dipeptidyl peptidase IV inhibitor | 1 | GF | [22-23]                                                                             |
| 8783 | dipeptidyl peptidase IV inhibitor (DPP IV inhibitor) | dipeptidyl peptidase IV inhibitor | 4 | GG | [81-82],[108-109],[283-284],[395-396]                                               |
| 8784 | dipeptidyl peptidase IV inhibitor (DPP IV inhibitor) | dipeptidyl peptidase IV inhibitor | 2 | GH | [274-275],[454-455]                                                                 |
| 8786 | dipeptidyl peptidase IV inhibitor (DPP IV inhibitor) | dipeptidyl peptidase IV inhibitor | 1 | GV | [82-83]                                                                             |
| 8790 | dipeptidyl peptidase IV inhibitor (DPP IV inhibitor) | dipeptidyl peptidase IV inhibitor | 2 | HE | [71-72],[89-90]                                                                     |
| 8791 | dipeptidyl peptidase IV inhibitor (DPP IV inhibitor) | dipeptidyl peptidase IV inhibitor | 1 | HF | [275-276]                                                                           |
| 8801 | dipeptidyl peptidase IV inhibitor (DPP IV inhibitor) | dipeptidyl peptidase IV inhibitor | 1 | II | [490-491]                                                                           |
| 8802 | dipeptidyl peptidase IV inhibitor (DPP IV inhibitor) | dipeptidyl peptidase IV inhibitor | 2 | IL | [226-227],[298-299]                                                                 |
| 8803 | dipeptidyl peptidase IV inhibitor (DPP IV inhibitor) | dipeptidyl peptidase IV inhibitor | 1 | IM | [322-323]                                                                           |
| 8804 | dipeptidyl peptidase IV inhibitor (DPP IV inhibitor) | dipeptidyl peptidase IV inhibitor | 1 | IN | [234-235]                                                                           |
| 8806 | dipeptidyl peptidase IV inhibitor (DPP IV inhibitor) | dipeptidyl peptidase IV inhibitor | 3 | IR | [330-331],[443-444],[480-481]                                                       |
| 8807 | dipeptidyl peptidase IV inhibitor (DPP IV inhibitor) | dipeptidyl peptidase IV inhibitor | 1 | IW | [342-343]                                                                           |
| 8808 | dipeptidyl peptidase IV inhibitor (DPP IV inhibitor) | dipeptidyl peptidase IV inhibitor | 9 | KE | [50-51],[55-56],[62-63],[125-126],[327-328],[496-497],[499-500],[530-531],[532-533] |
| 8809 | dipeptidyl peptidase IV inhibitor (DPP IV inhibitor) | dipeptidyl peptidase IV inhibitor | 2 | KF | [6-7],[176-177]                                                                     |
| 8810 | dipeptidyl peptidase IV inhibitor (DPP IV inhibitor) | dipeptidyl peptidase IV inhibitor | 2 | KG | [65-66],[394-395]                                                                   |
| 8811 | dipeptidyl peptidase IV inhibitor (DPP IV inhibitor) | dipeptidyl peptidase IV inhibitor | 2 | KH | [36-37],[94-95]                                                                     |
| 8812 | dipeptidyl peptidase IV inhibitor (DPP IV inhibitor) | dipeptidyl peptidase IV inhibitor | 4 | KI | [27-28],[225-226],[341-342],[408-409]                                               |
| 8813 | dipeptidyl peptidase IV inhibitor (DPP IV inhibitor) | dipeptidyl peptidase IV inhibitor | 5 | KK | [64-65],[124-125],[357-358],[437-438],[487-488]                                     |
| 8814 | dipeptidyl peptidase IV inhibitor (DPP IV inhibitor) | dipeptidyl peptidase IV inhibitor | 2 | KR | [133-134],[230-231]                                                                 |

|      |                                                      |                                   |   |    |                                                 |
|------|------------------------------------------------------|-----------------------------------|---|----|-------------------------------------------------|
| 8815 | dipeptidyl peptidase IV inhibitor (DPP IV inhibitor) | dipeptidyl peptidase IV inhibitor | 2 | KS | [180-181],[430-431]                             |
| 8816 | dipeptidyl peptidase IV inhibitor (DPP IV inhibitor) | dipeptidyl peptidase IV inhibitor | 2 | KT | [165-166],[304-305]                             |
| 8817 | dipeptidyl peptidase IV inhibitor (DPP IV inhibitor) | dipeptidyl peptidase IV inhibitor | 5 | KV | [40-41],[163-164],[170-171],[492-493],[512-513] |
| 8819 | dipeptidyl peptidase IV inhibitor (DPP IV inhibitor) | dipeptidyl peptidase IV inhibitor | 3 | KY | [59-60],[189-190],[365-366]                     |
| 8820 | dipeptidyl peptidase IV inhibitor (DPP IV inhibitor) | dipeptidyl peptidase IV inhibitor | 1 | LH | [184-185]                                       |
| 8825 | dipeptidyl peptidase IV inhibitor (DPP IV inhibitor) | dipeptidyl peptidase IV inhibitor | 4 | LV | [13-14],[17-18],[195-196],[263-264]             |
| 8826 | dipeptidyl peptidase IV inhibitor (DPP IV inhibitor) | dipeptidyl peptidase IV inhibitor | 2 | ME | [494-495],[505-506]                             |
| 8828 | dipeptidyl peptidase IV inhibitor (DPP IV inhibitor) | dipeptidyl peptidase IV inhibitor | 1 | MG | [1-2]                                           |
| 8831 | dipeptidyl peptidase IV inhibitor (DPP IV inhibitor) | dipeptidyl peptidase IV inhibitor | 1 | MK | [323-324]                                       |
| 8836 | dipeptidyl peptidase IV inhibitor (DPP IV inhibitor) | dipeptidyl peptidase IV inhibitor | 1 | MR | [100-101]                                       |
| 8837 | dipeptidyl peptidase IV inhibitor (DPP IV inhibitor) | dipeptidyl peptidase IV inhibitor | 1 | MV | [385-386]                                       |
| 8839 | dipeptidyl peptidase IV inhibitor (DPP IV inhibitor) | dipeptidyl peptidase IV inhibitor | 1 | NA | [475-476]                                       |
| 8840 | dipeptidyl peptidase IV inhibitor (DPP IV inhibitor) | dipeptidyl peptidase IV inhibitor | 1 | ND | [255-256]                                       |
| 8841 | dipeptidyl peptidase IV inhibitor (DPP IV inhibitor) | dipeptidyl peptidase IV inhibitor | 2 | NE | [258-259],[464-465]                             |
| 8845 | dipeptidyl peptidase IV inhibitor (DPP IV inhibitor) | dipeptidyl peptidase IV inhibitor | 2 | NL | [271-272],[466-467]                             |
| 8847 | dipeptidyl peptidase IV inhibitor (DPP IV inhibitor) | dipeptidyl peptidase IV inhibitor | 1 | NN | [254-255]                                       |
| 8851 | dipeptidyl peptidase IV inhibitor (DPP IV inhibitor) | dipeptidyl peptidase IV inhibitor | 1 | NV | [235-236]                                       |
| 8853 | dipeptidyl peptidase IV inhibitor (DPP IV inhibitor) | dipeptidyl peptidase IV inhibitor | 1 | NY | [131-132]                                       |
| 8854 | dipeptidyl peptidase IV inhibitor (DPP IV inhibitor) | dipeptidyl peptidase IV inhibitor | 4 | PF | [249-250],[344-345],[400-401],[456-457]         |
| 8855 | dipeptidyl peptidase IV inhibitor (DPP IV inhibitor) | dipeptidyl peptidase IV inhibitor | 2 | PG | [273-274],[282-283]                             |
| 8856 | dipeptidyl peptidase IV inhibitor (DPP IV inhibitor) | dipeptidyl peptidase IV inhibitor | 1 | PH | [424-425]                                       |
| 8858 | dipeptidyl peptidase IV inhibitor (DPP IV inhibitor) | dipeptidyl peptidase IV inhibitor | 2 | PK | [175-176],[340-341]                             |
| 8861 | dipeptidyl peptidase IV inhibitor (DPP IV inhibitor) | dipeptidyl peptidase IV inhibitor | 1 | PQ | [199-200]                                       |
| 8862 | dipeptidyl peptidase IV inhibitor (DPP IV inhibitor) | dipeptidyl peptidase IV inhibitor | 4 | PS | [86-87],[205-206],[360-361],[434-435]           |
| 8863 | dipeptidyl peptidase IV inhibitor (DPP IV inhibitor) | dipeptidyl peptidase IV inhibitor | 1 | PT | [4-5]                                           |
| 8864 | dipeptidyl peptidase IV inhibitor (DPP IV inhibitor) | dipeptidyl peptidase IV inhibitor | 1 | PV | [269-270]                                       |
| 8866 | dipeptidyl peptidase IV inhibitor (DPP IV inhibitor) | dipeptidyl peptidase IV inhibitor | 1 | PY | [152-153]                                       |
| 8867 | dipeptidyl peptidase IV inhibitor (DPP IV inhibitor) | dipeptidyl peptidase IV inhibitor | 1 | QA | [200-201]                                       |
| 8868 | dipeptidyl peptidase IV inhibitor (DPP IV inhibitor) | dipeptidyl peptidase IV inhibitor | 2 | QD | [317-318],[517-518]                             |
| 8869 | dipeptidyl peptidase IV inhibitor (DPP IV inhibitor) | dipeptidyl peptidase IV inhibitor | 2 | QE | [106-107],[120-121]                             |
| 8870 | dipeptidyl peptidase IV inhibitor (DPP IV inhibitor) | dipeptidyl peptidase IV inhibitor | 1 | QF | [265-266]                                       |
| 8871 | dipeptidyl peptidase IV inhibitor (DPP IV inhibitor) | dipeptidyl peptidase IV inhibitor | 4 | QG | [168-169],[238-239],[319-320],[524-525]         |
| 8872 | dipeptidyl peptidase IV inhibitor (DPP IV inhibitor) | dipeptidyl peptidase IV inhibitor | 1 | QH | [129-130]                                       |
| 8873 | dipeptidyl peptidase IV inhibitor (DPP IV inhibitor) | dipeptidyl peptidase IV inhibitor | 1 | QI | [329-330]                                       |
| 8874 | dipeptidyl peptidase IV inhibitor (DPP IV inhibitor) | dipeptidyl peptidase IV inhibitor | 2 | QL | [113-114],[368-369]                             |
| 8876 | dipeptidyl peptidase IV inhibitor (DPP IV inhibitor) | dipeptidyl peptidase IV inhibitor | 2 | QQ | [48-49],[110-111]                               |

|      |                                                      |                                   |   |    |                                                 |
|------|------------------------------------------------------|-----------------------------------|---|----|-------------------------------------------------|
| 8877 | dipeptidyl peptidase IV inhibitor (DPP IV inhibitor) | dipeptidyl peptidase IV inhibitor | 1 | QS | [362-363]                                       |
| 8881 | dipeptidyl peptidase IV inhibitor (DPP IV inhibitor) | dipeptidyl peptidase IV inhibitor | 1 | QY | [44-45]                                         |
| 8882 | dipeptidyl peptidase IV inhibitor (DPP IV inhibitor) | dipeptidyl peptidase IV inhibitor | 3 | RG | [127-128],[220-221],[336-337]                   |
| 8884 | dipeptidyl peptidase IV inhibitor (DPP IV inhibitor) | dipeptidyl peptidase IV inhibitor | 2 | RI | [374-375],[442-443]                             |
| 8885 | dipeptidyl peptidase IV inhibitor (DPP IV inhibitor) | dipeptidyl peptidase IV inhibitor | 2 | RK | [444-445],[529-530]                             |
| 8886 | dipeptidyl peptidase IV inhibitor (DPP IV inhibitor) | dipeptidyl peptidase IV inhibitor | 1 | RL | [191-192]                                       |
| 8889 | dipeptidyl peptidase IV inhibitor (DPP IV inhibitor) | dipeptidyl peptidase IV inhibitor | 1 | RR | [335-336]                                       |
| 8891 | dipeptidyl peptidase IV inhibitor (DPP IV inhibitor) | dipeptidyl peptidase IV inhibitor | 3 | SF | [8-9],[289-290],[352-353]                       |
| 8892 | dipeptidyl peptidase IV inhibitor (DPP IV inhibitor) | dipeptidyl peptidase IV inhibitor | 2 | SH | [206-207],[432-433]                             |
| 8893 | dipeptidyl peptidase IV inhibitor (DPP IV inhibitor) | dipeptidyl peptidase IV inhibitor | 3 | SI | [212-213],[233-234],[243-244]                   |
| 8894 | dipeptidyl peptidase IV inhibitor (DPP IV inhibitor) | dipeptidyl peptidase IV inhibitor | 4 | SK | [181-182],[306-307],[326-327],[429-430]         |
| 8895 | dipeptidyl peptidase IV inhibitor (DPP IV inhibitor) | dipeptidyl peptidase IV inhibitor | 2 | SV | [15-16],[398-399]                               |
| 8896 | dipeptidyl peptidase IV inhibitor (DPP IV inhibitor) | dipeptidyl peptidase IV inhibitor | 2 | SW | [217-218],[295-296]                             |
| 8897 | dipeptidyl peptidase IV inhibitor (DPP IV inhibitor) | dipeptidyl peptidase IV inhibitor | 2 | SY | [388-389],[435-436]                             |
| 8899 | dipeptidyl peptidase IV inhibitor (DPP IV inhibitor) | dipeptidyl peptidase IV inhibitor | 2 | TE | [166-167],[346-347]                             |
| 8901 | dipeptidyl peptidase IV inhibitor (DPP IV inhibitor) | dipeptidyl peptidase IV inhibitor | 2 | TG | [80-81],[350-351]                               |
| 8902 | dipeptidyl peptidase IV inhibitor (DPP IV inhibitor) | dipeptidyl peptidase IV inhibitor | 1 | TH | [88-89]                                         |
| 8903 | dipeptidyl peptidase IV inhibitor (DPP IV inhibitor) | dipeptidyl peptidase IV inhibitor | 2 | TI | [222-223],[321-322]                             |
| 8904 | dipeptidyl peptidase IV inhibitor (DPP IV inhibitor) | dipeptidyl peptidase IV inhibitor | 5 | TK | [5-6],[162-163],[224-225],[393-394],[407-408]   |
| 8905 | dipeptidyl peptidase IV inhibitor (DPP IV inhibitor) | dipeptidyl peptidase IV inhibitor | 2 | TL | [309-310],[483-484]                             |
| 8908 | dipeptidyl peptidase IV inhibitor (DPP IV inhibitor) | dipeptidyl peptidase IV inhibitor | 1 | TQ | [178-179]                                       |
| 8910 | dipeptidyl peptidase IV inhibitor (DPP IV inhibitor) | dipeptidyl peptidase IV inhibitor | 1 | TS | [305-306]                                       |
| 8911 | dipeptidyl peptidase IV inhibitor (DPP IV inhibitor) | dipeptidyl peptidase IV inhibitor | 1 | TT | [161-162]                                       |
| 8912 | dipeptidyl peptidase IV inhibitor (DPP IV inhibitor) | dipeptidyl peptidase IV inhibitor | 2 | TV | [447-448],[459-460]                             |
| 8915 | dipeptidyl peptidase IV inhibitor (DPP IV inhibitor) | dipeptidyl peptidase IV inhibitor | 2 | VD | [83-84],[510-511]                               |
| 8916 | dipeptidyl peptidase IV inhibitor (DPP IV inhibitor) | dipeptidyl peptidase IV inhibitor | 1 | VE | [419-420]                                       |
| 8917 | dipeptidyl peptidase IV inhibitor (DPP IV inhibitor) | dipeptidyl peptidase IV inhibitor | 4 | VF | [154-155],[278-279],[448-449],[513-514]         |
| 8921 | dipeptidyl peptidase IV inhibitor (DPP IV inhibitor) | dipeptidyl peptidase IV inhibitor | 2 | VK | [54-55],[164-165]                               |
| 8922 | dipeptidyl peptidase IV inhibitor (DPP IV inhibitor) | dipeptidyl peptidase IV inhibitor | 4 | VL | [16-17],[18-19],[172-173],[194-195]             |
| 8923 | dipeptidyl peptidase IV inhibitor (DPP IV inhibitor) | dipeptidyl peptidase IV inhibitor | 1 | VM | [493-494]                                       |
| 8924 | dipeptidyl peptidase IV inhibitor (DPP IV inhibitor) | dipeptidyl peptidase IV inhibitor | 2 | VN | [270-271],[474-475]                             |
| 8925 | dipeptidyl peptidase IV inhibitor (DPP IV inhibitor) | dipeptidyl peptidase IV inhibitor | 2 | VQ | [41-42],[264-265]                               |
| 8926 | dipeptidyl peptidase IV inhibitor (DPP IV inhibitor) | dipeptidyl peptidase IV inhibitor | 5 | VS | [14-15],[216-217],[242-243],[387-388],[413-414] |
| 8932 | dipeptidyl peptidase IV inhibitor (DPP IV inhibitor) | dipeptidyl peptidase IV inhibitor | 1 | YA | [389-390]                                       |
| 8933 | dipeptidyl peptidase IV inhibitor (DPP IV inhibitor) | dipeptidyl peptidase IV inhibitor | 1 | YD | [45-46]                                         |
| 8936 | dipeptidyl peptidase IV inhibitor (DPP IV inhibitor) | dipeptidyl peptidase IV inhibitor | 1 | YG | [366-367]                                       |

|      |                                                      |                                    |   |    |                                         |
|------|------------------------------------------------------|------------------------------------|---|----|-----------------------------------------|
| 8938 | dipeptidyl peptidase IV inhibitor (DPP IV inhibitor) | dipeptidyl peptidase IV inhibitor  | 1 | YI | [251-252]                               |
| 8939 | dipeptidyl peptidase IV inhibitor (DPP IV inhibitor) | dipeptidyl peptidase IV inhibitor  | 4 | YK | [61-62],[123-124],[132-133],[436-437]   |
| 8940 | dipeptidyl peptidase IV inhibitor (DPP IV inhibitor) | dipeptidyl peptidase IV inhibitor  | 1 | YL | [262-263]                               |
| 8942 | dipeptidyl peptidase IV inhibitor (DPP IV inhibitor) | dipeptidyl peptidase IV inhibitor  | 1 | YN | [402-403]                               |
| 8944 | dipeptidyl peptidase IV inhibitor (DPP IV inhibitor) | dipeptidyl peptidase IV inhibitor  | 2 | YR | [190-191],[291-292]                     |
| 8946 | dipeptidyl peptidase IV inhibitor (DPP IV inhibitor) | dipeptidyl peptidase IV inhibitor  | 1 | YV | [153-154]                               |
| 8948 | dipeptidyl peptidase IV inhibitor (DPP IV inhibitor) | dipeptidyl peptidase IV inhibitor  | 1 | YY | [60-61]                                 |
| 9476 | DPP-III inhibitor                                    | dipeptidyl peptidase III inhibitor | 1 | YY | [60-61]                                 |
| 9478 | DPP-III inhibitor                                    | dipeptidyl peptidase III inhibitor | 2 | LR | [267-268],[439-440]                     |
| 9479 | DPP-III inhibitor                                    | dipeptidyl peptidase III inhibitor | 1 | MR | [100-101]                               |
| 9482 | DPP-III inhibitor                                    | dipeptidyl peptidase III inhibitor | 1 | YL | [262-263]                               |
| 9483 | DPP-III inhibitor                                    | dipeptidyl peptidase III inhibitor | 4 | YK | [61-62],[123-124],[132-133],[436-437]   |
| 9484 | DPP-III inhibitor                                    | dipeptidyl peptidase III inhibitor | 2 | YR | [190-191],[291-292]                     |
| 9485 | DPP-III inhibitor                                    | dipeptidyl peptidase III inhibitor | 1 | RR | [335-336]                               |
| 9487 | DPP-III inhibitor                                    | dipeptidyl peptidase III inhibitor | 4 | GE | [284-285],[337-338],[415-416],[507-508] |
| 9488 | DPP-III inhibitor                                    | dipeptidyl peptidase III inhibitor | 1 | GF | [22-23]                                 |
| 9490 | DPP-III inhibitor                                    | dipeptidyl peptidase III inhibitor | 1 | RF | [116-117]                               |
| 9492 | DPP-III inhibitor                                    | dipeptidyl peptidase III inhibitor | 1 | DA | [209-210]                               |
| 9493 | DPP-III inhibitor                                    | dipeptidyl peptidase III inhibitor | 2 | HL | [95-96],[425-426]                       |
| 9495 | DPP-III inhibitor                                    | dipeptidyl peptidase III inhibitor | 1 | HF | [275-276]                               |
| 9496 | DPP-III inhibitor                                    | dipeptidyl peptidase III inhibitor | 2 | HP | [433-434],[455-456]                     |
| 9499 | DPP-III inhibitor                                    | dipeptidyl peptidase III inhibitor | 4 | LA | [25-26],[192-193],[484-485],[501-502]   |
| 9500 | DPP-III inhibitor                                    | dipeptidyl peptidase III inhibitor | 2 | FA | [23-24],[457-458]                       |
| 9501 | DPP-III inhibitor                                    | dipeptidyl peptidase III inhibitor | 1 | FR | [117-118]                               |
| 9502 | DPP-III inhibitor                                    | dipeptidyl peptidase III inhibitor | 2 | FL | [12-13],[266-267]                       |
| 9504 | DPP-III inhibitor                                    | dipeptidyl peptidase III inhibitor | 3 | PE | [30-31],[287-288],[526-527]             |
| 9505 | DPP-III inhibitor                                    | dipeptidyl peptidase III inhibitor | 4 | PF | [249-250],[344-345],[400-401],[456-457] |
| 9508 | DPP-III inhibitor                                    | dipeptidyl peptidase III inhibitor | 1 | YG | [366-367]                               |
| 9510 | DPP-III inhibitor                                    | dipeptidyl peptidase III inhibitor | 1 | YI | [251-252]                               |
| 9511 | DPP-III inhibitor                                    | dipeptidyl peptidase III inhibitor | 1 | KA | [324-325]                               |
| 8247 | CaMPDE inhibitor                                     | CaMPDE inhibitor                   | 3 | IR | [330-331],[443-444],[480-481]           |
| 8249 | CaMPDE inhibitor                                     | CaMPDE inhibitor                   | 2 | KF | [6-7],[176-177]                         |
| 8250 | CaMPDE inhibitor                                     | CaMPDE inhibitor                   | 1 | EF | [520-521]                               |
| 2835 | Renin inhibitor                                      | renin inhibitor                    | 3 | FT | [160-161],[177-178],[345-346]           |
| 2842 | Renin inhibitor                                      | renin inhibitor                    | 2 | LR | [267-268],[439-440]                     |
| 8246 | renin inhibitor                                      | renin inhibitor                    | 3 | IR | [330-331],[443-444],[480-481]           |

|      |                 |                 |   |    |                           |
|------|-----------------|-----------------|---|----|---------------------------|
| 8248 | Renin inhibitor | renin inhibitor | 2 | KF | [6-7],[176-177]           |
| 8251 | Renin inhibitor | renin inhibitor | 1 | EF | [520-521]                 |
| 9431 | Renin inhibitor | renin inhibitor | 1 | QF | [265-266]                 |
| 9432 | Renin inhibitor | renin inhibitor | 3 | SF | [8-9],[289-290],[352-353] |
| 9433 | Renin inhibitor | renin inhibitor | 1 | YA | [389-390]                 |
| 9470 | Renin inhibitor | renin inhibitor | 1 | LY | [261-262]                 |



Table S7. Profile of potential biological activity of fragments of protein Ana o 1.0102.

| ID   | Name of peptide                         | Activity      | Number | Sequence | Location                                |
|------|-----------------------------------------|---------------|--------|----------|-----------------------------------------|
| 3458 | Prolyl endopeptidase inhibitor          | antiamnestic  | 1      | GPGG     | [279-282]                               |
| 3460 | Prolyl endopeptidase inhibitor          | antiamnestic  | 2      | PG       | [271-272],[280-281]                     |
| 3461 | Prolyl endopeptidase inhibitor          | antiamnestic  | 3      | GP       | [279-280],[337-338],[523-524]           |
| 3257 | beta-lactokinin                         | ACE inhibitor | 1      | RL       | [189-190]                               |
| 3258 | beta-lactokinin                         | ACE inhibitor | 2      | IR       | [441-442],[478-479]                     |
| 3377 | ACE inhibitor (from bovine as1-CN)      | ACE inhibitor | 1      | FGK      | [512-514]                               |
| 3380 | ACE inhibitor                           | ACE inhibitor | 2      | RY       | [120-121],[479-480]                     |
| 3381 | ACE inhibitor                           | ACE inhibitor | 1      | LY       | [259-260]                               |
| 3384 | ACE inhibitor                           | ACE inhibitor | 4      | VF       | [152-153],[276-277],[446-447],[511-512] |
| 3421 | ACE inhibitor                           | ACE inhibitor | 1      | LVL      | [15-17]                                 |
| 3489 | ACE inhibitor from sake lees            | ACE inhibitor | 1      | RF       | [114-115]                               |
| 3543 | ACE inhibitor                           | ACE inhibitor | 1      | LRP      | [265-267]                               |
| 3551 | ACE inhibitor (from bovine beta-Lg)     | ACE inhibitor | 4      | LF       | [9-10],[311-312],[353-354],[367-368]    |
| 3553 | ACE inhibitor                           | ACE inhibitor | 1      | YG       | [364-365]                               |
| 3556 | ACE inhibitor                           | ACE inhibitor | 3      | FY       | [248-249],[288-289],[399-400]           |
| 3666 | ACE inhibitor                           | ACE inhibitor | 1      | YP       | [375-376]                               |
| 3713 | ACE inhibitor from alpha-zein           | ACE inhibitor | 1      | LLP      | [171-173]                               |
| 7511 | ACE inhibitor from Alaskan pollack skin | ACE inhibitor | 1      | LPG      | [270-272]                               |
| 7512 | ACE inhibitor from Alaskan pollack skin | ACE inhibitor | 3      | GP       | [279-280],[337-338],[523-524]           |
| 7513 | ACE inhibitor from Alaskan pollack skin | ACE inhibitor | 1      | PL       | [377-378]                               |
| 7544 | ACE inhibitor                           | ACE inhibitor | 1      | IW       | [340-341]                               |
| 7558 | ACE inhibitor from buckwheat            | ACE inhibitor | 2      | VK       | [52-53],[162-163]                       |
| 7559 | ACE inhibitor from buckwheat            | ACE inhibitor | 1      | PSY      | [432-434]                               |
| 7562 | ACE inhibitor from soy hydrolysate      | ACE inhibitor | 3      | IA       | [250-251],[407-408],[419-420]           |
| 7582 | ACE inhibitor                           | ACE inhibitor | 1      | RP       | [266-267]                               |
| 7583 | ACE inhibitor                           | ACE inhibitor | 3      | AF       | [199-200],[291-292],[500-501]           |
| 7585 | ACE inhibitor                           | ACE inhibitor | 4      | LA       | [23-24],[190-191],[482-483],[499-500]   |
| 7586 | ACE inhibitor                           | ACE inhibitor | 2      | KR       | [131-132],[228-229]                     |
| 7587 | ACE inhibitor                           | ACE inhibitor | 3      | VP       | [202-203],[397-398],[449-450]           |

|      |                                     |               |   |    |                                                             |
|------|-------------------------------------|---------------|---|----|-------------------------------------------------------------|
| 7588 | ACE inhibitor                       | ACE inhibitor | 5 | RA | [290-291],[329-330],[403-404],[438-439],[533-534]           |
| 7589 | ACE inhibitor                       | ACE inhibitor | 1 | YA | [387-388]                                                   |
| 7590 | ACE inhibitor                       | ACE inhibitor | 1 | AA | [299-300]                                                   |
| 7591 | ACE inhibitor                       | ACE inhibitor | 1 | GF | [20-21]                                                     |
| 7592 | ACE inhibitor                       | ACE inhibitor | 1 | FR | [115-116]                                                   |
| 7593 | ACE inhibitor                       | ACE inhibitor | 1 | IF | [211-212]                                                   |
| 7597 | ACE inhibitor                       | ACE inhibitor | 1 | GM | [394-395]                                                   |
| 7600 | ACE inhibitor                       | ACE inhibitor | 2 | AG | [451-452],[483-484]                                         |
| 7601 | ACE inhibitor                       | ACE inhibitor | 2 | GH | [272-273],[452-453]                                         |
| 7602 | ACE inhibitor                       | ACE inhibitor | 2 | HL | [93-94],[423-424]                                           |
| 7603 | ACE inhibitor                       | ACE inhibitor | 3 | GR | [64-65],[217-218],[532-533]                                 |
| 7604 | ACE inhibitor                       | ACE inhibitor | 2 | KG | [63-64],[392-393]                                           |
| 7605 | ACE inhibitor                       | ACE inhibitor | 1 | FG | [512-513]                                                   |
| 7606 | ACE inhibitor                       | ACE inhibitor | 1 | DA | [207-208]                                                   |
| 7607 | ACE inhibitor                       | ACE inhibitor | 1 | GS | [349-350]                                                   |
| 7608 | ACE inhibitor                       | ACE inhibitor | 1 | GV | [80-81]                                                     |
| 7610 | ACE inhibitor                       | ACE inhibitor | 3 | GQ | [107-108],[126-127],[365-366]                               |
| 7611 | ACE inhibitor                       | ACE inhibitor | 3 | GK | [167-168],[484-485],[513-514]                               |
| 7612 | ACE inhibitor                       | ACE inhibitor | 4 | GT | [77-78],[219-220],[245-246],[318-319]                       |
| 7613 | ACE inhibitor                       | ACE inhibitor | 2 | WG | [76-77],[216-217]                                           |
| 7614 | ACE inhibitor                       | ACE inhibitor | 1 | HG | [278-279]                                                   |
| 7615 | ACE inhibitor                       | ACE inhibitor | 4 | GE | [282-283],[335-336],[413-414],[505-506]                     |
| 7616 | ACE inhibitor                       | ACE inhibitor | 4 | GG | [79-80],[106-107],[281-282],[393-394]                       |
| 7617 | ACE inhibitor                       | ACE inhibitor | 4 | QG | [166-167],[236-237],[317-318],[522-523]                     |
| 7618 | ACE inhibitor                       | ACE inhibitor | 3 | SG | [244-245],[412-413],[460-461]                               |
| 7619 | ACE inhibitor                       | ACE inhibitor | 1 | LG | [19-20]                                                     |
| 7620 | ACE inhibitor                       | ACE inhibitor | 1 | GD | [237-238]                                                   |
| 7621 | ACE inhibitor                       | ACE inhibitor | 2 | TG | [78-79],[348-349]                                           |
| 7622 | ACE inhibitor                       | ACE inhibitor | 6 | EG | [105-106],[336-337],[414-415],[475-476],[504-505],[531-532] |
| 7623 | ACE inhibitor                       | ACE inhibitor | 4 | EA | [142-143],[298-299],[369-370],[495-496]                     |
| 7625 | ACE inhibitor                       | ACE inhibitor | 2 | PG | [271-272],[280-281]                                         |
| 7628 | ACE inhibitor from k-CN (fr. 67-68) | ACE inhibitor | 2 | VR | [234-235],[328-329]                                         |

|      |                                           |               |    |     |                                                                                               |
|------|-------------------------------------------|---------------|----|-----|-----------------------------------------------------------------------------------------------|
| 7636 | ACE inhibitor from k-CN (fr. 78-80)       | ACE inhibitor | 1  | SHP | [430-432]                                                                                     |
| 7637 | ACE inhibitor from bonito bowels          | ACE inhibitor | 1  | GHF | [272-274]                                                                                     |
| 7653 | ACE inhibitor from wakame                 | ACE inhibitor | 1  | KYY | [57-59]                                                                                       |
| 7680 | ACE inhibitor from pea vicilin            | ACE inhibitor | 3  | QK  | [47-48],[109-110],[177-178]                                                                   |
| 7682 | ACE inhibitor from garlic                 | ACE inhibitor | 1  | NY  | [129-130]                                                                                     |
| 7684 | ACE inhibitor from garlic                 | ACE inhibitor | 2  | SY  | [386-387],[433-434]                                                                           |
| 7685 | ACE inhibitor from garlic                 | ACE inhibitor | 3  | SF  | [6-7],[287-288],[350-351]                                                                     |
| 7691 | ACE inhibitor from wakame                 | ACE inhibitor | 3  | KY  | [57-58],[187-188],[363-364]                                                                   |
| 7692 | ACE inhibitor                             | ACE inhibitor | 2  | KF  | [4-5],[174-175]                                                                               |
| 7693 | ACE inhibitor from wakame                 | ACE inhibitor | 6  | KL  | [180-181],[258-259],[310-311],[352-353],[380-381],[436-437]                                   |
| 7697 | ACE inhibitor from wakame                 | ACE inhibitor | 4  | YK  | [59-60],[121-122],[130-131],[434-435]                                                         |
| 7698 | ACE inhibitor from wakame                 | ACE inhibitor | 2  | NK  | [227-228],[362-363]                                                                           |
| 7741 | ACE inhibitor                             | ACE inhibitor | 1  | RR  | [333-334]                                                                                     |
| 7742 | ACE inhibitor                             | ACE inhibitor | 1  | AR  | [439-440]                                                                                     |
| 7743 | ACE inhibitor                             | ACE inhibitor | 1  | KA  | [322-323]                                                                                     |
| 7751 | ACE inhibitor from shark meat hydrolysate | ACE inhibitor | 1  | CF  | [469-470]                                                                                     |
| 7823 | ACE inhibitor from micro algae            | ACE inhibitor | 1  | FAL | [21-23]                                                                                       |
| 7826 | ACE inhibitor                             | ACE inhibitor | 3  | EI  | [295-296],[418-419],[466-467]                                                                 |
| 7828 | ACE inhibitor                             | ACE inhibitor | 3  | EV  | [275-276],[471-472],[507-508]                                                                 |
| 7829 | ACE inhibitor                             | ACE inhibitor | 1  | VE  | [417-418]                                                                                     |
| 7830 | ACE inhibitor                             | ACE inhibitor | 2  | TE  | [164-165],[344-345]                                                                           |
| 7833 | ACE inhibitor                             | ACE inhibitor | 1  | PT  | [2-3]                                                                                         |
| 7834 | ACE inhibitor                             | ACE inhibitor | 1  | TQ  | [176-177]                                                                                     |
| 7836 | ACE inhibitor                             | ACE inhibitor | 2  | PP  | [1-2],[376-377]                                                                               |
| 7837 | ACE inhibitor                             | ACE inhibitor | 1  | PQ  | [197-198]                                                                                     |
| 7838 | ACE inhibitor                             | ACE inhibitor | 2  | EW  | [75-76],[525-526]                                                                             |
| 7839 | ACE inhibitor                             | ACE inhibitor | 2  | ME  | [492-493],[503-504]                                                                           |
| 7840 | ACE inhibitor                             | ACE inhibitor | 10 | EK  | [56-57],[61-62],[91-92],[186-187],[257-258],[309-310],[313-314],[379-380],[493-494],[529-530] |
| 7841 | ACE inhibitor                             | ACE inhibitor | 9  | KE  | [48-49],[53-54],[60-61],[123-124],[325-326],[494-495],[497-498],[528-529],[530-531]           |
| 7842 | ACE inhibitor                             | ACE inhibitor | 2  | HP  | [431-432],[453-454]                                                                           |
| 7843 | ACE inhibitor                             | ACE inhibitor | 1  | PH  | [422-423]                                                                                     |

|      |                                          |                  |   |      |                                           |
|------|------------------------------------------|------------------|---|------|-------------------------------------------|
| 8193 | ACE inhibitor                            | ACE inhibitor    | 1 | AI   | [408-409]                                 |
| 8951 | ACE inhibitor                            | ACE inhibitor    | 1 | AV   | [191-192]                                 |
| 9037 | ACE inhibitor                            | ACE inhibitor    | 1 | GKV  | [167-169]                                 |
| 9048 | ACE inhibitor                            | ACE inhibitor    | 1 | LVQ  | [261-263]                                 |
| 9053 | ACE inhibitor                            | ACE inhibitor    | 1 | FYN  | [399-401]                                 |
| 9060 | ACE inhibitor                            | ACE inhibitor    | 1 | AVL  | [191-193]                                 |
| 9064 | ACE inhibitor                            | ACE inhibitor    | 3 | LEK  | [185-187],[308-310],[378-380]             |
| 9072 | ACE inhibitor                            | ACE inhibitor    | 1 | DY   | [374-375]                                 |
| 9073 | ACE inhibitor                            | ACE inhibitor    | 1 | TP   | [246-247]                                 |
| 9074 | ACE inhibitor                            | ACE inhibitor    | 1 | DF   | [157-158]                                 |
| 9075 | ACE inhibitor                            | ACE inhibitor    | 1 | DM   | [382-383]                                 |
| 9076 | ACE inhibitor                            | ACE inhibitor    | 1 | FQ   | [521-522]                                 |
| 9077 | ACE inhibitor                            | ACE inhibitor    | 1 | YV   | [151-152]                                 |
| 9079 | ACE inhibitor                            | ACE inhibitor    | 2 | IL   | [224-225],[296-297]                       |
| 9146 | ACE inhibitor                            | ACE inhibitor    | 1 | QGP  | [522-524]                                 |
| 9173 | ACE inhibitor                            | ACE inhibitor    | 3 | RG   | [125-126],[218-219],[334-335]             |
| 9183 | ACE inhibitor                            | ACE inhibitor    | 1 | GTG  | [77-79]                                   |
| 9184 | ACE inhibitor                            | ACE inhibitor    | 2 | ST   | [85-86],[347-348]                         |
| 9185 | ACE inhibitor                            | ACE inhibitor    | 1 | YN   | [400-401]                                 |
| 9213 | ACE inhibitor                            | ACE inhibitor    | 2 | LR   | [265-266],[437-438]                       |
| 9731 | ACE inhibitor                            | ACE inhibitor    | 1 | VVL  | [169-171]                                 |
| 3283 | Antithrombotic peptide                   | antithrombotic   | 3 | GP   | [279-280],[337-338],[523-524]             |
| 3285 | Antithrombotic peptide                   | antithrombotic   | 2 | PG   | [271-272],[280-281]                       |
| 3354 | Antithrombotic peptide                   | antithrombotic   | 1 | DEE  | [516-518]                                 |
| 3462 |                                          | antithrombotic   | 1 | GPGG | [279-282]                                 |
| 2882 | Immunostimulating peptide                | immunomodulating | 1 | YG   | [364-365]                                 |
| 3351 | Stimulating vasoactive substance release | stimulating      | 5 | EEE  | [70-72],[71-73],[72-74],[73-75],[144-146] |
| 3355 | Stimulating vasoactive substance release | stimulating      | 1 | SSS  | [425-427]                                 |
| 8320 | Glucose uptake stimulating peptide       | stimulating      | 4 | VL   | [14-15],[16-17],[170-171],[192-193]       |
| 8321 | Glucose uptake stimulating peptide       | stimulating      | 4 | LV   | [11-12],[15-16],[193-194],[261-262]       |
| 8322 | Glucose uptake stimulating peptide       | stimulating      | 4 | IV   | [239-240],[409-410],[448-449],[467-468]   |
| 8323 | Glucose uptake stimulating peptide       | stimulating      | 2 | IL   | [224-225],[296-297]                       |

|      |                                                                                   |                           |    |      |                                                                                           |
|------|-----------------------------------------------------------------------------------|---------------------------|----|------|-------------------------------------------------------------------------------------------|
| 8325 | Glucose uptake stimulating peptide                                                | stimulating               | 1  | II   | [488-489]                                                                                 |
| 8326 | Glucose uptake stimulating peptide                                                | stimulating               | 2  | LL   | [171-172],[181-182]                                                                       |
| 8329 | Stimulating vasoactive substance release                                          | stimulating               | 10 | EE   | [70-71],[71-72],[72-73],[73-74],[74-75],[144-145],[145-146],[345-346],[506-507],[517-518] |
| 3066 | Immunostimulating peptide                                                         | immunostimulating         | 2  | EAE  | [142-144],[369-371]                                                                       |
| 2890 | neuropeptide                                                                      | neuropeptide              | 3  | GQ   | [107-108],[126-127],[365-366]                                                             |
| 8310 | Anxiolytic peptide                                                                | neuropeptide              | 1  | YL   | [260-261]                                                                                 |
| 9534 | Kyotorphin                                                                        | neuropeptide              | 2  | YR   | [188-189],[289-290]                                                                       |
| 2749 | peptide regulating ion flow                                                       | regulating                | 1  | DY   | [374-375]                                                                                 |
| 2753 | peptide regulating the stomach mucosal membrane activity                          | regulating                | 3  | GP   | [279-280],[337-338],[523-524]                                                             |
| 2754 | peptide regulating the stomach mucosal membrane activity                          | regulating                | 2  | PG   | [271-272],[280-281]                                                                       |
| 2755 | peptide regulating the stomach mucosal membrane activity                          | regulating                | 1  | GPGG | [279-282]                                                                                 |
| 3305 |                                                                                   | antioxidative             | 1  | LH   | [182-183]                                                                                 |
| 3317 |                                                                                   | antioxidative             | 2  | HL   | [93-94],[423-424]                                                                         |
| 7863 | peptide from prawn muscle ( <i>Penaeus japonicus</i> )                            | antioxidative             | 1  | FKK  | [354-356]                                                                                 |
| 7872 | peptide from soybean protein isolates: beta-conglycinin and glycinin              | antioxidative             | 1  | LY   | [259-260]                                                                                 |
| 7888 | antioxidative peptide                                                             | antioxidative             | 2  | EL   | [29-30],[498-499]                                                                         |
| 7931 | synthetic peptide                                                                 | antioxidative             | 1  | KYY  | [57-59]                                                                                   |
| 7937 | synthetic peptide                                                                 | antioxidative             | 1  | YYK  | [58-60]                                                                                   |
| 7988 | synthetic peptide                                                                 | antioxidative             | 1  | LHA  | [182-184]                                                                                 |
| 8029 | synthetic peptide                                                                 | antioxidative             | 1  | PHL  | [422-424]                                                                                 |
| 8114 | peptide derived from sardinelle by-products proteins ( <i>Sardinella aurita</i> ) | antioxidative             | 1  | GGE  | [281-283]                                                                                 |
| 8130 | peptide derived from dried bonito                                                 | antioxidative             | 1  | EAK  | [495-497]                                                                                 |
| 8134 | peptide derived from dried bonito                                                 | antioxidative             | 3  | KD   | [305-306],[356-357],[443-444]                                                             |
| 8139 | synthetic peptide                                                                 | antioxidative             | 1  | PEL  | [28-30]                                                                                   |
| 8215 | Antioxidative peptide                                                             | antioxidative             | 2  | IR   | [441-442],[478-479]                                                                       |
| 8217 | Antioxidative peptide                                                             | antioxidative             | 2  | LK   | [30-31],[301-302]                                                                         |
| 9082 | Antioxidative peptide                                                             | antioxidative             | 2  | WG   | [76-77],[216-217]                                                                         |
| 9363 | Antioxidative peptide                                                             | antioxidative             | 1  | NEN  | [462-464]                                                                                 |
| 9368 | Antioxidative peptide                                                             | antioxidative             | 1  | EQC  | [49-51]                                                                                   |
| 3751 |                                                                                   | bacterial permease ligand | 5  | KK   | [62-63],[122-123],[355-356],[435-436],[485-486]                                           |

|      |                                                      |                                           |   |     |                                                   |
|------|------------------------------------------------------|-------------------------------------------|---|-----|---------------------------------------------------|
| 4005 |                                                      | activating ubiquitin-mediated proteolysis | 5 | RA  | [290-291],[329-330],[403-404],[438-439],[533-534] |
| 4006 | Ubiquitin-mediated proteolysis activating peptide    | activating ubiquitin-mediated proteolysis | 4 | LA  | [23-24],[190-191],[482-483],[499-500]             |
| 9580 | Hypolipidemic peptide                                | hypolipidemic                             | 1 | EF  | [518-519]                                         |
| 9548 | Alpha-glucosidase inhibitor                          | alpha-glucosidase inhibitor               | 1 | YP  | [375-376]                                         |
| 9650 | Alpha-glucosidase inhibitor                          | alpha-glucosidase inhibitor               | 4 | EA  | [142-143],[298-299],[369-370],[495-496]           |
| 9651 | Alpha-glucosidase inhibitor                          | alpha-glucosidase inhibitor               | 2 | PP  | [1-2],[376-377]                                   |
| 9693 | Alpha-glucosidase inhibitor                          | alpha-glucosidase inhibitor               | 1 | VE  | [417-418]                                         |
| 9694 | Alpha-glucosidase inhibitor                          | alpha-glucosidase inhibitor               | 3 | PE  | [28-29],[285-286],[524-525]                       |
| 9695 | Alpha-glucosidase inhibitor                          | alpha-glucosidase inhibitor               | 2 | AD  | [208-209],[534-535]                               |
| 9383 | HMG-CoA reductase inhibitor                          | HMG-CoA reductase inhibitor               | 1 | GGV | [79-81]                                           |
| 3169 | dipeptidyl peptidase IV inhibitor (DPP IV inhibitor) | dipeptidyl peptidase IV inhibitor         | 3 | GP  | [279-280],[337-338],[523-524]                     |
| 3170 | dipeptidyl peptidase IV inhibitor (DPP IV inhibitor) | dipeptidyl peptidase IV inhibitor         | 2 | PP  | [1-2],[376-377]                                   |
| 3172 | dipeptidyl peptidase IV inhibitor (DPP IV inhibitor) | dipeptidyl peptidase IV inhibitor         | 2 | VA  | [194-195],[458-459]                               |
| 3174 | dipeptidyl peptidase IV inhibitor (DPP IV inhibitor) | dipeptidyl peptidase IV inhibitor         | 1 | KA  | [322-323]                                         |
| 3175 | dipeptidyl peptidase IV inhibitor (DPP IV inhibitor) | dipeptidyl peptidase IV inhibitor         | 4 | LA  | [23-24],[190-191],[482-483],[499-500]             |
| 3176 | dipeptidyl peptidase IV inhibitor (DPP IV inhibitor) | dipeptidyl peptidase IV inhibitor         | 2 | FA  | [21-22],[455-456]                                 |
| 3179 | dipeptidyl peptidase IV inhibitor (DPP IV inhibitor) | dipeptidyl peptidase IV inhibitor         | 2 | PA  | [89-90],[450-451]                                 |
| 3180 | dipeptidyl peptidase IV inhibitor (DPP IV inhibitor) | dipeptidyl peptidase IV inhibitor         | 2 | LP  | [172-173],[270-271]                               |
| 3181 | dipeptidyl peptidase IV inhibitor (DPP IV inhibitor) | dipeptidyl peptidase IV inhibitor         | 3 | VP  | [202-203],[397-398],[449-450]                     |
| 3182 | dipeptidyl peptidase IV inhibitor (DPP IV inhibitor) | dipeptidyl peptidase IV inhibitor         | 2 | LL  | [171-172],[181-182]                               |
| 3183 | dipeptidyl peptidase IV inhibitor (DPP IV inhibitor) | dipeptidyl peptidase IV inhibitor         | 4 | VV  | [169-170],[201-202],[384-385],[410-411]           |
| 3184 | dipeptidyl peptidase IV inhibitor (DPP IV inhibitor) | dipeptidyl peptidase IV inhibitor         | 1 | HA  | [183-184]                                         |
| 8503 | Dipeptidyl peptidase IV inhibitor (DPP IV inhibitor) | dipeptidyl peptidase IV inhibitor         | 1 | TP  | [246-247]                                         |
| 8504 | Dipeptidyl peptidase IV inhibitor (DPP IV inhibitor) | dipeptidyl peptidase IV inhibitor         | 1 | WP  | [341-342]                                         |
| 8518 | dipeptidyl peptidase IV inhibitor (DPP IV inhibitor) | dipeptidyl peptidase IV inhibitor         | 1 | RP  | [266-267]                                         |
| 8520 | dipeptidyl peptidase IV inhibitor (DPP IV inhibitor) | dipeptidyl peptidase IV inhibitor         | 2 | HP  | [431-432],[453-454]                               |
| 8521 | dipeptidyl peptidase IV inhibitor (DPP IV inhibitor) | dipeptidyl peptidase IV inhibitor         | 1 | YP  | [375-376]                                         |
| 8525 | dipeptidyl peptidase IV inhibitor (DPP IV inhibitor) | dipeptidyl peptidase IV inhibitor         | 3 | IA  | [250-251],[407-408],[419-420]                     |
| 8526 | dipeptidyl peptidase IV inhibitor (DPP IV inhibitor) | dipeptidyl peptidase IV inhibitor         | 5 | RA  | [290-291],[329-330],[403-404],[438-439],[533-534] |
| 8529 | dipeptidyl peptidase IV inhibitor (DPP IV inhibitor) | dipeptidyl peptidase IV inhibitor         | 2 | EP  | [83-84],[88-89]                                   |
| 8530 | dipeptidyl peptidase IV inhibitor (DPP IV inhibitor) | dipeptidyl peptidase IV inhibitor         | 3 | NP  | [149-150],[196-197],[284-285]                     |

|      |                                                      |                                   |    |     |                                                                                               |
|------|------------------------------------------------------|-----------------------------------|----|-----|-----------------------------------------------------------------------------------------------|
| 8555 | dipeptidyl peptidase IV inhibitor (DPP IV inhibitor) | dipeptidyl peptidase IV inhibitor | 2  | FL  | [10-11],[264-265]                                                                             |
| 8557 | dipeptidyl peptidase IV inhibitor (DPP IV inhibitor) | dipeptidyl peptidase IV inhibitor | 2  | HL  | [93-94],[423-424]                                                                             |
| 8558 | dipeptidyl peptidase IV inhibitor (DPP IV inhibitor) | dipeptidyl peptidase IV inhibitor | 10 | EK  | [56-57],[61-62],[91-92],[186-187],[257-258],[309-310],[313-314],[379-380],[493-494],[529-530] |
| 8559 | dipeptidyl peptidase IV inhibitor (DPP IV inhibitor) | dipeptidyl peptidase IV inhibitor | 3  | AL  | [22-23],[184-185],[300-301]                                                                   |
| 8560 | dipeptidyl peptidase IV inhibitor (DPP IV inhibitor) | dipeptidyl peptidase IV inhibitor | 1  | SL  | [8-9]                                                                                         |
| 8594 | dipeptidyl peptidase IV inhibitor (DPP IV inhibitor) | dipeptidyl peptidase IV inhibitor | 2  | VR  | [234-235],[328-329]                                                                           |
| 8598 | dipeptidyl peptidase IV inhibitor (DPP IV inhibitor) | dipeptidyl peptidase IV inhibitor | 1  | WRK | [526-528]                                                                                     |
| 8637 | dipeptidyl peptidase IV inhibitor (DPP IV inhibitor) | dipeptidyl peptidase IV inhibitor | 1  | AA  | [299-300]                                                                                     |
| 8638 | dipeptidyl peptidase IV inhibitor (DPP IV inhibitor) | dipeptidyl peptidase IV inhibitor | 1  | PL  | [377-378]                                                                                     |
| 8652 | dipeptidyl peptidase IV inhibitor (DPP IV inhibitor) | dipeptidyl peptidase IV inhibitor | 1  | PPL | [376-378]                                                                                     |
| 8675 | dipeptidyl peptidase IV inhibitor (DPP IV inhibitor) | dipeptidyl peptidase IV inhibitor | 1  | WR  | [526-527]                                                                                     |
| 8691 | dipeptidyl peptidase IV inhibitor (DPP IV inhibitor) | dipeptidyl peptidase IV inhibitor | 1  | WE  | [294-295]                                                                                     |
| 8696 | dipeptidyl peptidase IV inhibitor (DPP IV inhibitor) | dipeptidyl peptidase IV inhibitor | 1  | YT  | [480-481]                                                                                     |
| 8697 | dipeptidyl peptidase IV inhibitor (DPP IV inhibitor) | dipeptidyl peptidase IV inhibitor | 2  | WG  | [76-77],[216-217]                                                                             |
| 8757 | dipeptidyl peptidase IV inhibitor (DPP IV inhibitor) | dipeptidyl peptidase IV inhibitor | 2  | AD  | [208-209],[534-535]                                                                           |
| 8758 | dipeptidyl peptidase IV inhibitor (DPP IV inhibitor) | dipeptidyl peptidase IV inhibitor | 4  | AE  | [90-91],[143-144],[370-371],[474-475]                                                         |
| 8759 | dipeptidyl peptidase IV inhibitor (DPP IV inhibitor) | dipeptidyl peptidase IV inhibitor | 3  | AF  | [199-200],[291-292],[500-501]                                                                 |
| 8760 | dipeptidyl peptidase IV inhibitor (DPP IV inhibitor) | dipeptidyl peptidase IV inhibitor | 2  | AG  | [451-452],[483-484]                                                                           |
| 8762 | dipeptidyl peptidase IV inhibitor (DPP IV inhibitor) | dipeptidyl peptidase IV inhibitor | 2  | AS  | [323-324],[459-460]                                                                           |
| 8763 | dipeptidyl peptidase IV inhibitor (DPP IV inhibitor) | dipeptidyl peptidase IV inhibitor | 2  | AT  | [404-405],[456-457]                                                                           |
| 8764 | dipeptidyl peptidase IV inhibitor (DPP IV inhibitor) | dipeptidyl peptidase IV inhibitor | 1  | AV  | [191-192]                                                                                     |
| 8767 | dipeptidyl peptidase IV inhibitor (DPP IV inhibitor) | dipeptidyl peptidase IV inhibitor | 2  | DP  | [27-28],[357-358]                                                                             |
| 8768 | dipeptidyl peptidase IV inhibitor (DPP IV inhibitor) | dipeptidyl peptidase IV inhibitor | 1  | DQ  | [316-317]                                                                                     |
| 8770 | dipeptidyl peptidase IV inhibitor (DPP IV inhibitor) | dipeptidyl peptidase IV inhibitor | 6  | EG  | [105-106],[336-337],[414-415],[475-476],[504-505],[531-532]                                   |
| 8771 | dipeptidyl peptidase IV inhibitor (DPP IV inhibitor) | dipeptidyl peptidase IV inhibitor | 1  | EH  | [68-69]                                                                                       |
| 8772 | dipeptidyl peptidase IV inhibitor (DPP IV inhibitor) | dipeptidyl peptidase IV inhibitor | 3  | EI  | [295-296],[418-419],[466-467]                                                                 |
| 8773 | dipeptidyl peptidase IV inhibitor (DPP IV inhibitor) | dipeptidyl peptidase IV inhibitor | 3  | ES  | [230-231],[286-287],[346-347]                                                                 |
| 8775 | dipeptidyl peptidase IV inhibitor (DPP IV inhibitor) | dipeptidyl peptidase IV inhibitor | 3  | EV  | [275-276],[471-472],[507-508]                                                                 |
| 8776 | dipeptidyl peptidase IV inhibitor (DPP IV inhibitor) | dipeptidyl peptidase IV inhibitor | 2  | EW  | [75-76],[525-526]                                                                             |
| 8779 | dipeptidyl peptidase IV inhibitor (DPP IV inhibitor) | dipeptidyl peptidase IV inhibitor | 1  | FQ  | [521-522]                                                                                     |
| 8780 | dipeptidyl peptidase IV inhibitor (DPP IV inhibitor) | dipeptidyl peptidase IV inhibitor | 1  | FR  | [115-116]                                                                                     |

|      |                                                      |                                   |   |    |                                                                                     |
|------|------------------------------------------------------|-----------------------------------|---|----|-------------------------------------------------------------------------------------|
| 8781 | dipeptidyl peptidase IV inhibitor (DPP IV inhibitor) | dipeptidyl peptidase IV inhibitor | 4 | GE | [282-283],[335-336],[413-414],[505-506]                                             |
| 8782 | dipeptidyl peptidase IV inhibitor (DPP IV inhibitor) | dipeptidyl peptidase IV inhibitor | 1 | GF | [20-21]                                                                             |
| 8783 | dipeptidyl peptidase IV inhibitor (DPP IV inhibitor) | dipeptidyl peptidase IV inhibitor | 4 | GG | [79-80],[106-107],[281-282],[393-394]                                               |
| 8784 | dipeptidyl peptidase IV inhibitor (DPP IV inhibitor) | dipeptidyl peptidase IV inhibitor | 2 | GH | [272-273],[452-453]                                                                 |
| 8786 | dipeptidyl peptidase IV inhibitor (DPP IV inhibitor) | dipeptidyl peptidase IV inhibitor | 1 | GV | [80-81]                                                                             |
| 8790 | dipeptidyl peptidase IV inhibitor (DPP IV inhibitor) | dipeptidyl peptidase IV inhibitor | 2 | HE | [69-70],[87-88]                                                                     |
| 8791 | dipeptidyl peptidase IV inhibitor (DPP IV inhibitor) | dipeptidyl peptidase IV inhibitor | 1 | HF | [273-274]                                                                           |
| 8801 | dipeptidyl peptidase IV inhibitor (DPP IV inhibitor) | dipeptidyl peptidase IV inhibitor | 1 | II | [488-489]                                                                           |
| 8802 | dipeptidyl peptidase IV inhibitor (DPP IV inhibitor) | dipeptidyl peptidase IV inhibitor | 2 | IL | [224-225],[296-297]                                                                 |
| 8803 | dipeptidyl peptidase IV inhibitor (DPP IV inhibitor) | dipeptidyl peptidase IV inhibitor | 1 | IM | [320-321]                                                                           |
| 8804 | dipeptidyl peptidase IV inhibitor (DPP IV inhibitor) | dipeptidyl peptidase IV inhibitor | 1 | IN | [232-233]                                                                           |
| 8806 | dipeptidyl peptidase IV inhibitor (DPP IV inhibitor) | dipeptidyl peptidase IV inhibitor | 2 | IR | [441-442],[478-479]                                                                 |
| 8807 | dipeptidyl peptidase IV inhibitor (DPP IV inhibitor) | dipeptidyl peptidase IV inhibitor | 1 | IW | [340-341]                                                                           |
| 8808 | dipeptidyl peptidase IV inhibitor (DPP IV inhibitor) | dipeptidyl peptidase IV inhibitor | 9 | KE | [48-49],[53-54],[60-61],[123-124],[325-326],[494-495],[497-498],[528-529],[530-531] |
| 8809 | dipeptidyl peptidase IV inhibitor (DPP IV inhibitor) | dipeptidyl peptidase IV inhibitor | 2 | KF | [4-5],[174-175]                                                                     |
| 8810 | dipeptidyl peptidase IV inhibitor (DPP IV inhibitor) | dipeptidyl peptidase IV inhibitor | 2 | KG | [63-64],[392-393]                                                                   |
| 8811 | dipeptidyl peptidase IV inhibitor (DPP IV inhibitor) | dipeptidyl peptidase IV inhibitor | 2 | KH | [34-35],[92-93]                                                                     |
| 8812 | dipeptidyl peptidase IV inhibitor (DPP IV inhibitor) | dipeptidyl peptidase IV inhibitor | 4 | KI | [25-26],[223-224],[339-340],[406-407]                                               |
| 8813 | dipeptidyl peptidase IV inhibitor (DPP IV inhibitor) | dipeptidyl peptidase IV inhibitor | 5 | KK | [62-63],[122-123],[355-356],[435-436],[485-486]                                     |
| 8814 | dipeptidyl peptidase IV inhibitor (DPP IV inhibitor) | dipeptidyl peptidase IV inhibitor | 2 | KR | [131-132],[228-229]                                                                 |
| 8815 | dipeptidyl peptidase IV inhibitor (DPP IV inhibitor) | dipeptidyl peptidase IV inhibitor | 2 | KS | [178-179],[428-429]                                                                 |
| 8816 | dipeptidyl peptidase IV inhibitor (DPP IV inhibitor) | dipeptidyl peptidase IV inhibitor | 2 | KT | [163-164],[302-303]                                                                 |
| 8817 | dipeptidyl peptidase IV inhibitor (DPP IV inhibitor) | dipeptidyl peptidase IV inhibitor | 5 | KV | [38-39],[161-162],[168-169],[490-491],[510-511]                                     |
| 8819 | dipeptidyl peptidase IV inhibitor (DPP IV inhibitor) | dipeptidyl peptidase IV inhibitor | 3 | KY | [57-58],[187-188],[363-364]                                                         |
| 8820 | dipeptidyl peptidase IV inhibitor (DPP IV inhibitor) | dipeptidyl peptidase IV inhibitor | 1 | LH | [182-183]                                                                           |
| 8825 | dipeptidyl peptidase IV inhibitor (DPP IV inhibitor) | dipeptidyl peptidase IV inhibitor | 4 | LV | [11-12],[15-16],[193-194],[261-262]                                                 |
| 8826 | dipeptidyl peptidase IV inhibitor (DPP IV inhibitor) | dipeptidyl peptidase IV inhibitor | 2 | ME | [492-493],[503-504]                                                                 |
| 8831 | dipeptidyl peptidase IV inhibitor (DPP IV inhibitor) | dipeptidyl peptidase IV inhibitor | 1 | MK | [321-322]                                                                           |
| 8836 | dipeptidyl peptidase IV inhibitor (DPP IV inhibitor) | dipeptidyl peptidase IV inhibitor | 1 | MR | [98-99]                                                                             |
| 8837 | dipeptidyl peptidase IV inhibitor (DPP IV inhibitor) | dipeptidyl peptidase IV inhibitor | 1 | MV | [383-384]                                                                           |
| 8839 | dipeptidyl peptidase IV inhibitor (DPP IV inhibitor) | dipeptidyl peptidase IV inhibitor | 1 | NA | [473-474]                                                                           |



|      |                                                      |                                   |   |    |                                         |
|------|------------------------------------------------------|-----------------------------------|---|----|-----------------------------------------|
| 8840 | dipeptidyl peptidase IV inhibitor (DPP IV inhibitor) | dipeptidyl peptidase IV inhibitor | 1 | ND | [253-254]                               |
| 8841 | dipeptidyl peptidase IV inhibitor (DPP IV inhibitor) | dipeptidyl peptidase IV inhibitor | 2 | NE | [256-257],[462-463]                     |
| 8845 | dipeptidyl peptidase IV inhibitor (DPP IV inhibitor) | dipeptidyl peptidase IV inhibitor | 2 | NL | [269-270],[464-465]                     |
| 8847 | dipeptidyl peptidase IV inhibitor (DPP IV inhibitor) | dipeptidyl peptidase IV inhibitor | 1 | NN | [252-253]                               |
| 8851 | dipeptidyl peptidase IV inhibitor (DPP IV inhibitor) | dipeptidyl peptidase IV inhibitor | 1 | NV | [233-234]                               |
| 8853 | dipeptidyl peptidase IV inhibitor (DPP IV inhibitor) | dipeptidyl peptidase IV inhibitor | 1 | NY | [129-130]                               |
| 8854 | dipeptidyl peptidase IV inhibitor (DPP IV inhibitor) | dipeptidyl peptidase IV inhibitor | 4 | PF | [247-248],[342-343],[398-399],[454-455] |
| 8855 | dipeptidyl peptidase IV inhibitor (DPP IV inhibitor) | dipeptidyl peptidase IV inhibitor | 2 | PG | [271-272],[280-281]                     |
| 8856 | dipeptidyl peptidase IV inhibitor (DPP IV inhibitor) | dipeptidyl peptidase IV inhibitor | 1 | PH | [422-423]                               |
| 8858 | dipeptidyl peptidase IV inhibitor (DPP IV inhibitor) | dipeptidyl peptidase IV inhibitor | 2 | PK | [173-174],[338-339]                     |
| 8861 | dipeptidyl peptidase IV inhibitor (DPP IV inhibitor) | dipeptidyl peptidase IV inhibitor | 1 | PQ | [197-198]                               |
| 8862 | dipeptidyl peptidase IV inhibitor (DPP IV inhibitor) | dipeptidyl peptidase IV inhibitor | 4 | PS | [84-85],[203-204],[358-359],[432-433]   |
| 8863 | dipeptidyl peptidase IV inhibitor (DPP IV inhibitor) | dipeptidyl peptidase IV inhibitor | 1 | PT | [2-3]                                   |
| 8864 | dipeptidyl peptidase IV inhibitor (DPP IV inhibitor) | dipeptidyl peptidase IV inhibitor | 1 | PV | [267-268]                               |
| 8866 | dipeptidyl peptidase IV inhibitor (DPP IV inhibitor) | dipeptidyl peptidase IV inhibitor | 1 | PY | [150-151]                               |
| 8867 | dipeptidyl peptidase IV inhibitor (DPP IV inhibitor) | dipeptidyl peptidase IV inhibitor | 1 | QA | [198-199]                               |
| 8868 | dipeptidyl peptidase IV inhibitor (DPP IV inhibitor) | dipeptidyl peptidase IV inhibitor | 2 | QD | [315-316],[515-516]                     |
| 8869 | dipeptidyl peptidase IV inhibitor (DPP IV inhibitor) | dipeptidyl peptidase IV inhibitor | 2 | QE | [104-105],[118-119]                     |
| 8870 | dipeptidyl peptidase IV inhibitor (DPP IV inhibitor) | dipeptidyl peptidase IV inhibitor | 1 | QF | [263-264]                               |
| 8871 | dipeptidyl peptidase IV inhibitor (DPP IV inhibitor) | dipeptidyl peptidase IV inhibitor | 4 | QG | [166-167],[236-237],[317-318],[522-523] |
| 8872 | dipeptidyl peptidase IV inhibitor (DPP IV inhibitor) | dipeptidyl peptidase IV inhibitor | 1 | QH | [127-128]                               |
| 8874 | dipeptidyl peptidase IV inhibitor (DPP IV inhibitor) | dipeptidyl peptidase IV inhibitor | 2 | QL | [111-112],[366-367]                     |
| 8876 | dipeptidyl peptidase IV inhibitor (DPP IV inhibitor) | dipeptidyl peptidase IV inhibitor | 2 | QQ | [46-47],[108-109]                       |
| 8877 | dipeptidyl peptidase IV inhibitor (DPP IV inhibitor) | dipeptidyl peptidase IV inhibitor | 1 | QS | [360-361]                               |
| 8879 | dipeptidyl peptidase IV inhibitor (DPP IV inhibitor) | dipeptidyl peptidase IV inhibitor | 1 | QV | [327-328]                               |
| 8881 | dipeptidyl peptidase IV inhibitor (DPP IV inhibitor) | dipeptidyl peptidase IV inhibitor | 1 | QY | [42-43]                                 |
| 8882 | dipeptidyl peptidase IV inhibitor (DPP IV inhibitor) | dipeptidyl peptidase IV inhibitor | 3 | RG | [125-126],[218-219],[334-335]           |
| 8884 | dipeptidyl peptidase IV inhibitor (DPP IV inhibitor) | dipeptidyl peptidase IV inhibitor | 2 | RI | [372-373],[440-441]                     |
| 8885 | dipeptidyl peptidase IV inhibitor (DPP IV inhibitor) | dipeptidyl peptidase IV inhibitor | 2 | RK | [442-443],[527-528]                     |
| 8886 | dipeptidyl peptidase IV inhibitor (DPP IV inhibitor) | dipeptidyl peptidase IV inhibitor | 1 | RL | [189-190]                               |
| 8889 | dipeptidyl peptidase IV inhibitor (DPP IV inhibitor) | dipeptidyl peptidase IV inhibitor | 1 | RR | [333-334]                               |
| 8891 | dipeptidyl peptidase IV inhibitor (DPP IV inhibitor) | dipeptidyl peptidase IV inhibitor | 3 | SF | [6-7],[287-288],[350-351]               |

|      |                                                      |                                   |   |    |                                                 |
|------|------------------------------------------------------|-----------------------------------|---|----|-------------------------------------------------|
| 8892 | dipeptidyl peptidase IV inhibitor (DPP IV inhibitor) | dipeptidyl peptidase IV inhibitor | 2 | SH | [204-205],[430-431]                             |
| 8893 | dipeptidyl peptidase IV inhibitor (DPP IV inhibitor) | dipeptidyl peptidase IV inhibitor | 3 | SI | [210-211],[231-232],[241-242]                   |
| 8894 | dipeptidyl peptidase IV inhibitor (DPP IV inhibitor) | dipeptidyl peptidase IV inhibitor | 4 | SK | [179-180],[304-305],[324-325],[427-428]         |
| 8895 | dipeptidyl peptidase IV inhibitor (DPP IV inhibitor) | dipeptidyl peptidase IV inhibitor | 2 | SV | [13-14],[396-397]                               |
| 8896 | dipeptidyl peptidase IV inhibitor (DPP IV inhibitor) | dipeptidyl peptidase IV inhibitor | 2 | SW | [215-216],[293-294]                             |
| 8897 | dipeptidyl peptidase IV inhibitor (DPP IV inhibitor) | dipeptidyl peptidase IV inhibitor | 2 | SY | [386-387],[433-434]                             |
| 8899 | dipeptidyl peptidase IV inhibitor (DPP IV inhibitor) | dipeptidyl peptidase IV inhibitor | 2 | TE | [164-165],[344-345]                             |
| 8901 | dipeptidyl peptidase IV inhibitor (DPP IV inhibitor) | dipeptidyl peptidase IV inhibitor | 2 | TG | [78-79],[348-349]                               |
| 8902 | dipeptidyl peptidase IV inhibitor (DPP IV inhibitor) | dipeptidyl peptidase IV inhibitor | 1 | TH | [86-87]                                         |
| 8903 | dipeptidyl peptidase IV inhibitor (DPP IV inhibitor) | dipeptidyl peptidase IV inhibitor | 2 | TI | [220-221],[319-320]                             |
| 8904 | dipeptidyl peptidase IV inhibitor (DPP IV inhibitor) | dipeptidyl peptidase IV inhibitor | 5 | TK | [3-4],[160-161],[222-223],[391-392],[405-406]   |
| 8905 | dipeptidyl peptidase IV inhibitor (DPP IV inhibitor) | dipeptidyl peptidase IV inhibitor | 2 | TL | [307-308],[481-482]                             |
| 8908 | dipeptidyl peptidase IV inhibitor (DPP IV inhibitor) | dipeptidyl peptidase IV inhibitor | 1 | TQ | [176-177]                                       |
| 8910 | dipeptidyl peptidase IV inhibitor (DPP IV inhibitor) | dipeptidyl peptidase IV inhibitor | 1 | TS | [303-304]                                       |
| 8911 | dipeptidyl peptidase IV inhibitor (DPP IV inhibitor) | dipeptidyl peptidase IV inhibitor | 1 | TT | [159-160]                                       |
| 8912 | dipeptidyl peptidase IV inhibitor (DPP IV inhibitor) | dipeptidyl peptidase IV inhibitor | 2 | TV | [445-446],[457-458]                             |
| 8915 | dipeptidyl peptidase IV inhibitor (DPP IV inhibitor) | dipeptidyl peptidase IV inhibitor | 2 | VD | [81-82],[508-509]                               |
| 8916 | dipeptidyl peptidase IV inhibitor (DPP IV inhibitor) | dipeptidyl peptidase IV inhibitor | 1 | VE | [417-418]                                       |
| 8917 | dipeptidyl peptidase IV inhibitor (DPP IV inhibitor) | dipeptidyl peptidase IV inhibitor | 4 | VF | [152-153],[276-277],[446-447],[511-512]         |
| 8921 | dipeptidyl peptidase IV inhibitor (DPP IV inhibitor) | dipeptidyl peptidase IV inhibitor | 2 | VK | [52-53],[162-163]                               |
| 8922 | dipeptidyl peptidase IV inhibitor (DPP IV inhibitor) | dipeptidyl peptidase IV inhibitor | 4 | VL | [14-15],[16-17],[170-171],[192-193]             |
| 8923 | dipeptidyl peptidase IV inhibitor (DPP IV inhibitor) | dipeptidyl peptidase IV inhibitor | 1 | VM | [491-492]                                       |
| 8924 | dipeptidyl peptidase IV inhibitor (DPP IV inhibitor) | dipeptidyl peptidase IV inhibitor | 2 | VN | [268-269],[472-473]                             |
| 8925 | dipeptidyl peptidase IV inhibitor (DPP IV inhibitor) | dipeptidyl peptidase IV inhibitor | 2 | VQ | [39-40],[262-263]                               |
| 8926 | dipeptidyl peptidase IV inhibitor (DPP IV inhibitor) | dipeptidyl peptidase IV inhibitor | 5 | VS | [12-13],[214-215],[240-241],[385-386],[411-412] |
| 8932 | dipeptidyl peptidase IV inhibitor (DPP IV inhibitor) | dipeptidyl peptidase IV inhibitor | 1 | YA | [387-388]                                       |
| 8933 | dipeptidyl peptidase IV inhibitor (DPP IV inhibitor) | dipeptidyl peptidase IV inhibitor | 1 | YD | [43-44]                                         |
| 8936 | dipeptidyl peptidase IV inhibitor (DPP IV inhibitor) | dipeptidyl peptidase IV inhibitor | 1 | YG | [364-365]                                       |
| 8938 | dipeptidyl peptidase IV inhibitor (DPP IV inhibitor) | dipeptidyl peptidase IV inhibitor | 1 | YI | [249-250]                                       |
| 8939 | dipeptidyl peptidase IV inhibitor (DPP IV inhibitor) | dipeptidyl peptidase IV inhibitor | 4 | YK | [59-60],[121-122],[130-131],[434-435]           |
| 8940 | dipeptidyl peptidase IV inhibitor (DPP IV inhibitor) | dipeptidyl peptidase IV inhibitor | 1 | YL | [260-261]                                       |
| 8942 | dipeptidyl peptidase IV inhibitor (DPP IV inhibitor) | dipeptidyl peptidase IV inhibitor | 1 | YN | [400-401]                                       |

|      |                                                      |                                    |   |    |                                         |
|------|------------------------------------------------------|------------------------------------|---|----|-----------------------------------------|
| 8944 | dipeptidyl peptidase IV inhibitor (DPP IV inhibitor) | dipeptidyl peptidase IV inhibitor  | 2 | YR | [188-189],[289-290]                     |
| 8946 | dipeptidyl peptidase IV inhibitor (DPP IV inhibitor) | dipeptidyl peptidase IV inhibitor  | 1 | YV | [151-152]                               |
| 8948 | dipeptidyl peptidase IV inhibitor (DPP IV inhibitor) | dipeptidyl peptidase IV inhibitor  | 1 | YY | [58-59]                                 |
| 9476 | DPP-III inhibitor                                    | dipeptidyl peptidase III inhibitor | 1 | YY | [58-59]                                 |
| 9478 | DPP-III inhibitor                                    | dipeptidyl peptidase III inhibitor | 2 | LR | [265-266],[437-438]                     |
| 9479 | DPP-III inhibitor                                    | dipeptidyl peptidase III inhibitor | 1 | MR | [98-99]                                 |
| 9482 | DPP-III inhibitor                                    | dipeptidyl peptidase III inhibitor | 1 | YL | [260-261]                               |
| 9483 | DPP-III inhibitor                                    | dipeptidyl peptidase III inhibitor | 4 | YK | [59-60],[121-122],[130-131],[434-435]   |
| 9484 | DPP-III inhibitor                                    | dipeptidyl peptidase III inhibitor | 2 | YR | [188-189],[289-290]                     |
| 9485 | DPP-III inhibitor                                    | dipeptidyl peptidase III inhibitor | 1 | RR | [333-334]                               |
| 9487 | DPP-III inhibitor                                    | dipeptidyl peptidase III inhibitor | 4 | GE | [282-283],[335-336],[413-414],[505-506] |
| 9488 | DPP-III inhibitor                                    | dipeptidyl peptidase III inhibitor | 1 | GF | [20-21]                                 |
| 9490 | DPP-III inhibitor                                    | dipeptidyl peptidase III inhibitor | 1 | RF | [114-115]                               |
| 9492 | DPP-III inhibitor                                    | dipeptidyl peptidase III inhibitor | 1 | DA | [207-208]                               |
| 9493 | DPP-III inhibitor                                    | dipeptidyl peptidase III inhibitor | 2 | HL | [93-94],[423-424]                       |
| 9495 | DPP-III inhibitor                                    | dipeptidyl peptidase III inhibitor | 1 | HF | [273-274]                               |
| 9496 | DPP-III inhibitor                                    | dipeptidyl peptidase III inhibitor | 2 | HP | [431-432],[453-454]                     |
| 9499 | DPP-III inhibitor                                    | dipeptidyl peptidase III inhibitor | 4 | LA | [23-24],[190-191],[482-483],[499-500]   |
| 9500 | DPP-III inhibitor                                    | dipeptidyl peptidase III inhibitor | 2 | FA | [21-22],[455-456]                       |
| 9501 | DPP-III inhibitor                                    | dipeptidyl peptidase III inhibitor | 1 | FR | [115-116]                               |
| 9502 | DPP-III inhibitor                                    | dipeptidyl peptidase III inhibitor | 2 | FL | [10-11],[264-265]                       |
| 9504 | DPP-III inhibitor                                    | dipeptidyl peptidase III inhibitor | 3 | PE | [28-29],[285-286],[524-525]             |
| 9505 | DPP-III inhibitor                                    | dipeptidyl peptidase III inhibitor | 4 | PF | [247-248],[342-343],[398-399],[454-455] |
| 9508 | DPP-III inhibitor                                    | dipeptidyl peptidase III inhibitor | 1 | YG | [364-365]                               |
| 9510 | DPP-III inhibitor                                    | dipeptidyl peptidase III inhibitor | 1 | YI | [249-250]                               |
| 9511 | DPP-III inhibitor                                    | dipeptidyl peptidase III inhibitor | 1 | KA | [322-323]                               |
| 8247 | CaMPDE inhibitor                                     | CaMPDE inhibitor                   | 2 | IR | [441-442],[478-479]                     |
| 8249 | CaMPDE inhibitor                                     | CaMPDE inhibitor                   | 2 | KF | [4-5],[174-175]                         |
| 8250 | CaMPDE inhibitor                                     | CaMPDE inhibitor                   | 1 | EF | [518-519]                               |
| 2835 | Renin inhibitor                                      | renin inhibitor                    | 3 | FT | [158-159],[175-176],[343-344]           |
| 2842 | Renin inhibitor                                      | renin inhibitor                    | 2 | LR | [265-266],[437-438]                     |
| 8246 | renin inhibitor                                      | renin inhibitor                    | 2 | IR | [441-442],[478-479]                     |

|      |                 |                 |   |    |                           |
|------|-----------------|-----------------|---|----|---------------------------|
| 8248 | Renin inhibitor | renin inhibitor | 2 | KF | [4-5],[174-175]           |
| 8251 | Renin inhibitor | renin inhibitor | 1 | EF | [518-519]                 |
| 9431 | Renin inhibitor | renin inhibitor | 1 | QF | [263-264]                 |
| 9432 | Renin inhibitor | renin inhibitor | 3 | SF | [6-7],[287-288],[350-351] |
| 9433 | Renin inhibitor | renin inhibitor | 1 | YA | [387-388]                 |
| 9470 | Renin inhibitor | renin inhibitor | 1 | LY | [259-260]                 |

Table S8. Profile of potential biological activity of fragments of protein Ana o 2.0101.

| ID   | Name of peptide                         | Activity      | Number | Sequence | Location                                        |
|------|-----------------------------------------|---------------|--------|----------|-------------------------------------------------|
| 3460 | Prolyl endopeptidase inhibitor          | antiamnestic  | 1      | PG       | [99-100]                                        |
| 2653 | ACE inhibitor                           | ACE inhibitor | 1      | VLP      | [331-333]                                       |
| 3257 | beta-lactokinin                         | ACE inhibitor | 4      | RL       | [29-30],[217-218],[281-282],[301-302]           |
| 3258 | beta-lactokinin                         | ACE inhibitor | 2      | IR       | [127-128],[242-243]                             |
| 3381 | ACE inhibitor                           | ACE inhibitor | 1      | LY       | [325-326]                                       |
| 3383 | ACE inhibitor                           | ACE inhibitor | 3      | IY       | [85-86],[294-295],[343-344]                     |
| 3384 | ACE inhibitor                           | ACE inhibitor | 2      | VF       | [185-186],[362-363]                             |
| 3386 | ACE inhibitor                           | ACE inhibitor | 1      | KW       | [314-315]                                       |
| 3421 | ACE inhibitor                           | ACE inhibitor | 1      | LVL      | [330-332]                                       |
| 3489 | ACE inhibitor from sake lees            | ACE inhibitor | 3      | RF       | [119-120],[129-130],[389-390]                   |
| 3507 | ACE inhibitor (beta-LG fr. 78-80)       | ACE inhibitor | 1      | IPA      | [138-140]                                       |
| 3528 | ACE inhibitor                           | ACE inhibitor | 1      | LVR      | [63-65]                                         |
| 3537 | ACE inhibitor                           | ACE inhibitor | 1      | PR       | [173-174]                                       |
| 3551 | ACE inhibitor (from bovine beta-Lg)     | ACE inhibitor | 2      | LF       | [8-9],[199-200]                                 |
| 3553 | ACE inhibitor                           | ACE inhibitor | 1      | YG       | [344-345]                                       |
| 3597 | ACE inhibitor                           | ACE inhibitor | 1      | AIP      | [137-139]                                       |
| 3666 | ACE inhibitor                           | ACE inhibitor | 1      | YP       | [98-99]                                         |
| 3713 | ACE inhibitor from alpha-zein           | ACE inhibitor | 1      | LLP      | [74-76]                                         |
| 7513 | ACE inhibitor from Alaskan pollack skin | ACE inhibitor | 1      | PL       | [405-406]                                       |
| 7543 | ACE inhibitor                           | ACE inhibitor | 1      | AW       | [48-49]                                         |
| 7547 | ACE inhibitor                           | ACE inhibitor | 1      | IRP      | [242-244]                                       |
| 7558 | ACE inhibitor from buckwheat            | ACE inhibitor | 3      | VK       | [232-233],[234-235],[382-383]                   |
| 7562 | ACE inhibitor from soy hydrolysate      | ACE inhibitor | 1      | IA       | [136-137]                                       |
| 7580 | ACE inhibitor                           | ACE inhibitor | 1      | RW       | [265-266]                                       |
| 7581 | ACE inhibitor                           | ACE inhibitor | 1      | IP       | [138-139]                                       |
| 7582 | ACE inhibitor                           | ACE inhibitor | 1      | RP       | [243-244]                                       |
| 7583 | ACE inhibitor                           | ACE inhibitor | 2      | AF       | [211-212],[424-425]                             |
| 7584 | ACE inhibitor                           | ACE inhibitor | 2      | AP       | [81-82],[107-108]                               |
| 7585 | ACE inhibitor                           | ACE inhibitor | 5      | LA       | [13-14],[178-179],[208-209],[406-407],[421-422] |

|      |               |               |   |    |                                                   |
|------|---------------|---------------|---|----|---------------------------------------------------|
| 7586 | ACE inhibitor | ACE inhibitor | 2 | KR | [263-264],[383-384]                               |
| 7587 | ACE inhibitor | ACE inhibitor | 1 | VP | [375-376]                                         |
| 7588 | ACE inhibitor | ACE inhibitor | 3 | RA | [291-292],[384-385],[400-401]                     |
| 7591 | ACE inhibitor | ACE inhibitor | 1 | GF | [202-203]                                         |
| 7592 | ACE inhibitor | ACE inhibitor | 2 | FR | [56-57],[130-131]                                 |
| 7594 | ACE inhibitor | ACE inhibitor | 1 | VG | [299-300]                                         |
| 7596 | ACE inhibitor | ACE inhibitor | 3 | GI | [95-96],[230-231],[272-273]                       |
| 7597 | ACE inhibitor | ACE inhibitor | 2 | GM | [92-93],[415-416]                                 |
| 7599 | ACE inhibitor | ACE inhibitor | 1 | GL | [72-73]                                           |
| 7600 | ACE inhibitor | ACE inhibitor | 5 | AG | [43-44],[59-60],[140-141],[179-180],[407-408]     |
| 7602 | ACE inhibitor | ACE inhibitor | 1 | HL | [177-178]                                         |
| 7603 | ACE inhibitor | ACE inhibitor | 5 | GR | [111-112],[118-119],[196-197],[300-301],[408-409] |
| 7604 | ACE inhibitor | ACE inhibitor | 3 | KG | [322-323],[347-348],[349-350]                     |
| 7605 | ACE inhibitor | ACE inhibitor | 1 | FG | [358-359]                                         |
| 7606 | ACE inhibitor | ACE inhibitor | 3 | DA | [31-32],[431-432],[456-457]                       |
| 7607 | ACE inhibitor | ACE inhibitor | 1 | GS | [252-253]                                         |
| 7608 | ACE inhibitor | ACE inhibitor | 3 | GV | [60-61],[141-142],[323-324]                       |
| 7610 | ACE inhibitor | ACE inhibitor | 4 | GQ | [115-116],[267-268],[350-351],[370-371]           |
| 7611 | ACE inhibitor | ACE inhibitor | 1 | GK | [348-349]                                         |
| 7612 | ACE inhibitor | ACE inhibitor | 1 | GT | [44-45]                                           |
| 7613 | ACE inhibitor | ACE inhibitor | 1 | WG | [266-267]                                         |
| 7614 | ACE inhibitor | ACE inhibitor | 1 | HG | [10-11]                                           |
| 7615 | ACE inhibitor | ACE inhibitor | 3 | GE | [90-91],[365-366],[447-448]                       |
| 7616 | ACE inhibitor | ACE inhibitor | 2 | GG | [229-230],[414-415]                               |
| 7617 | ACE inhibitor | ACE inhibitor | 3 | QG | [89-90],[110-111],[114-115]                       |
| 7618 | ACE inhibitor | ACE inhibitor | 3 | SG | [117-118],[201-202],[446-447]                     |
| 7619 | ACE inhibitor | ACE inhibitor | 1 | LG | [413-414]                                         |
| 7620 | ACE inhibitor | ACE inhibitor | 1 | GD | [133-134]                                         |
| 7621 | ACE inhibitor | ACE inhibitor | 1 | TG | [94-95]                                           |
| 7622 | ACE inhibitor | ACE inhibitor | 3 | EG | [91-92],[149-150],[369-370]                       |
| 7623 | ACE inhibitor | ACE inhibitor | 3 | EA | [42-43],[47-48],[210-211]                         |
| 7624 | ACE inhibitor | ACE inhibitor | 2 | NG | [71-72],[271-272]                                 |

|      |                                           |               |   |      |                                     |
|------|-------------------------------------------|---------------|---|------|-------------------------------------|
| 7625 | ACE inhibitor                             | ACE inhibitor | 1 | PG   | [99-100]                            |
| 7628 | ACE inhibitor from k-CN (fr. 67-68)       | ACE inhibitor | 2 | VR   | [64-65],[367-368]                   |
| 7657 | ACE inhibitor from human plasma           | ACE inhibitor | 1 | LIY  | [84-86]                             |
| 7667 | ACE inhibitor from k-CN (94-97)           | ACE inhibitor | 1 | IAIP | [136-139]                           |
| 7680 | ACE inhibitor from pea vicilin            | ACE inhibitor | 1 | QK   | [125-126]                           |
| 7681 | ACE inhibitor from soy                    | ACE inhibitor | 1 | DG   | [364-365]                           |
| 7683 | ACE inhibitor from garlic                 | ACE inhibitor | 2 | NF   | [357-358],[378-379]                 |
| 7684 | ACE inhibitor from garlic                 | ACE inhibitor | 1 | SY   | [97-98]                             |
| 7685 | ACE inhibitor from garlic                 | ACE inhibitor | 1 | SF   | [394-395]                           |
| 7692 | ACE inhibitor                             | ACE inhibitor | 2 | KF   | [175-176],[436-437]                 |
| 7697 | ACE inhibitor from wakame                 | ACE inhibitor | 1 | YK   | [326-327]                           |
| 7741 | ACE inhibitor                             | ACE inhibitor | 3 | RR   | [128-129],[131-132],[264-265]       |
| 7742 | ACE inhibitor                             | ACE inhibitor | 3 | AR   | [290-291],[385-386],[432-433]       |
| 7751 | ACE inhibitor from shark meat hydrolysate | ACE inhibitor | 1 | CF   | [4-5]                               |
| 7752 | ACE inhibitor from shark meat hydrolysate | ACE inhibitor | 1 | EY   | [40-41]                             |
| 7827 | ACE inhibitor                             | ACE inhibitor | 1 | IE   | [273-274]                           |
| 7828 | ACE inhibitor                             | ACE inhibitor | 3 | EV   | [298-299],[366-367],[419-420]       |
| 7829 | ACE inhibitor                             | ACE inhibitor | 3 | VE   | [39-40],[46-47],[320-321]           |
| 7830 | ACE inhibitor                             | ACE inhibitor | 1 | TE   | [205-206]                           |
| 7831 | ACE inhibitor                             | ACE inhibitor | 1 | LQ   | [316-317]                           |
| 7832 | ACE inhibitor                             | ACE inhibitor | 3 | LN   | [305-306],[308-309],[337-338]       |
| 7835 | ACE inhibitor                             | ACE inhibitor | 1 | AH   | [143-144]                           |
| 7837 | ACE inhibitor                             | ACE inhibitor | 4 | PQ   | [76-77],[82-83],[108-109],[376-377] |
| 7838 | ACE inhibitor                             | ACE inhibitor | 2 | EW   | [18-19],[391-392]                   |
| 7840 | ACE inhibitor                             | ACE inhibitor | 2 | EK   | [262-263],[321-322]                 |
| 7841 | ACE inhibitor                             | ACE inhibitor | 1 | KE   | [283-284]                           |
| 7843 | ACE inhibitor                             | ACE inhibitor | 1 | PH   | [333-334]                           |
| 8182 | ACE Inhibitor                             | ACE inhibitor | 1 | ALEP | [32-35]                             |
| 8184 | ACE Inhibitor                             | ACE inhibitor | 1 | IQP  | [68-70]                             |
| 8193 | ACE inhibitor                             | ACE inhibitor | 1 | AI   | [137-138]                           |
| 8951 | ACE inhibitor                             | ACE inhibitor | 1 | AV   | [380-381]                           |
| 9046 | ACE inhibitor                             | ACE inhibitor | 1 | VQV  | [352-354]                           |

|      |                                          |                  |   |      |                                                   |
|------|------------------------------------------|------------------|---|------|---------------------------------------------------|
| 9050 | ACE inhibitor                            | ACE inhibitor    | 1 | VLY  | [324-326]                                         |
| 9066 | ACE inhibitor                            | ACE inhibitor    | 1 | YPG  | [98-100]                                          |
| 9073 | ACE inhibitor                            | ACE inhibitor    | 2 | TP   | [172-173],[296-297]                               |
| 9076 | ACE inhibitor                            | ACE inhibitor    | 4 | FQ   | [120-121],[186-187],[212-213],[425-426]           |
| 9077 | ACE inhibitor                            | ACE inhibitor    | 1 | YV   | [86-87]                                           |
| 9078 | ACE inhibitor                            | ACE inhibitor    | 1 | YE   | [41-42]                                           |
| 9079 | ACE inhibitor                            | ACE inhibitor    | 2 | IL   | [7-8],[312-313]                                   |
| 9107 | ACE inhibitor                            | ACE inhibitor    | 1 | WL   | [315-316]                                         |
| 9173 | ACE inhibitor                            | ACE inhibitor    | 4 | RG   | [132-133],[195-196],[228-229],[251-252]           |
| 9185 | ACE inhibitor                            | ACE inhibitor    | 1 | YN   | [147-148]                                         |
| 9196 | ACE inhibitor                            | ACE inhibitor    | 1 | AVV  | [380-382]                                         |
| 9213 | ACE inhibitor                            | ACE inhibitor    | 1 | LR   | [239-240]                                         |
| 9325 | ACE inhibitor                            | ACE inhibitor    | 1 | GVLY | [323-326]                                         |
| 9566 | ACE inhibitor                            | ACE inhibitor    | 1 | QP   | [69-70]                                           |
| 9704 | ACE inhibitor                            | ACE inhibitor    | 1 | IYY  | [342-344]                                         |
| 9742 | ACE inhibitor                            | ACE inhibitor    | 1 | EKR  | [262-264]                                         |
| 3285 | Antithrombotic peptide                   | antithrombotic   | 1 | PG   | [99-100]                                          |
| 9660 | Antithrombotic peptide                   | antithrombotic   | 1 | RGD  | [132-134]                                         |
| 2882 | Immunostimulating peptide                | immunomodulating | 1 | YG   | [344-345]                                         |
| 3027 | Kentsin                                  | immunomodulating | 1 | TPRK | [172-175]                                         |
| 3351 | Stimulating vasoactive substance release | stimulating      | 1 | EEE  | [256-258]                                         |
| 3356 | Stimulating vasoactive substance release | stimulating      | 1 | LLL  | [73-75]                                           |
| 8320 | Glucose uptake stimulating peptide       | stimulating      | 4 | VL   | [324-325],[331-332],[412-413],[420-421]           |
| 8321 | Glucose uptake stimulating peptide       | stimulating      | 3 | LV   | [63-64],[330-331],[373-374]                       |
| 8322 | Glucose uptake stimulating peptide       | stimulating      | 1 | IV   | [231-232]                                         |
| 8323 | Glucose uptake stimulating peptide       | stimulating      | 2 | IL   | [7-8],[312-313]                                   |
| 8324 | Glucose uptake stimulating peptide       | stimulating      | 3 | LI   | [6-7],[84-85],[218-219]                           |
| 8325 | Glucose uptake stimulating peptide       | stimulating      | 2 | II   | [135-136],[342-343]                               |
| 8326 | Glucose uptake stimulating peptide       | stimulating      | 4 | LL   | [73-74],[74-75],[159-160],[207-208]               |
| 8329 | Stimulating vasoactive substance release | stimulating      | 5 | EE   | [256-257],[257-258],[274-275],[387-388],[418-419] |
| 8330 | Stimulating vasoactive substance release | stimulating      | 5 | SE   | [224-225],[249-250],[253-254],[255-256],[259-260] |
| 2890 | neuropeptide                             | neuropeptide     | 4 | GQ   | [115-116],[267-268],[350-351],[370-371]           |



|      |                                                                       |                                           |   |     |                                                 |
|------|-----------------------------------------------------------------------|-------------------------------------------|---|-----|-------------------------------------------------|
| 2754 | peptide regulating the stomach mucosal membrane activity              | regulating                                | 1 | PG  | [99-100]                                        |
| 3317 |                                                                       | antioxidative                             | 1 | HL  | [177-178]                                       |
| 3319 |                                                                       | antioxidative                             | 1 | HH  | [451-452]                                       |
| 7872 | peptide from soybean protein isolates: beta-conglycinin and glycinin  | antioxidative                             | 1 | LY  | [325-326]                                       |
| 7873 | peptide from soybean protein isolates: beta-conglycinin and glycinin  | antioxidative                             | 3 | IY  | [85-86],[294-295],[343-344]                     |
| 7886 | peptide derived from egg white albumin                                | antioxidative                             | 1 | AH  | [143-144]                                       |
| 7888 | antioxidative peptide                                                 | antioxidative                             | 2 | EL  | [206-207],[238-239]                             |
| 7922 | synthetic peptide                                                     | antioxidative                             | 1 | SHH | [450-452]                                       |
| 8037 | synthetic peptide                                                     | antioxidative                             | 1 | PHW | [333-335]                                       |
| 8064 | synthetic peptide                                                     | antioxidative                             | 1 | RHQ | [123-125]                                       |
| 8067 | synthetic peptide                                                     | antioxidative                             | 1 | RHT | [65-67]                                         |
| 8073 | synthetic peptide                                                     | antioxidative                             | 1 | RWG | [265-267]                                       |
| 8105 | peptide derived from dried bonito                                     | antioxidative                             | 1 | VKV | [232-234]                                       |
| 8134 | peptide derived from dried bonito                                     | antioxidative                             | 2 | KD  | [183-184],[235-236]                             |
| 8214 | Antioxidative peptide                                                 | antioxidative                             | 1 | RW  | [265-266]                                       |
| 8215 | Antioxidative peptide                                                 | antioxidative                             | 2 | IR  | [127-128],[242-243]                             |
| 8217 | Antioxidative peptide                                                 | antioxidative                             | 3 | LK  | [222-223],[282-283],[313-314]                   |
| 8219 | antioxidative peptide                                                 | antioxidative                             | 1 | TY  | [104-105]                                       |
| 8460 | Antioxidant peptide from marine bivalve ( <i>Macra veneriformis</i> ) | antioxidative                             | 1 | AW  | [48-49]                                         |
| 9082 | Antioxidative peptide                                                 | antioxidative                             | 1 | WG  | [266-267]                                       |
| 3164 | laminin-like peptide                                                  | embryotoxic                               | 1 | RGD | [132-134]                                       |
| 4005 |                                                                       | activating ubiquitin-mediated proteolysis | 3 | RA  | [291-292],[384-385],[400-401]                   |
| 4006 | Ubiquitin-mediated proteolysis activating peptide                     | activating ubiquitin-mediated proteolysis | 5 | LA  | [13-14],[178-179],[208-209],[406-407],[421-422] |
| 9548 | Alpha-glucosidase inhibitor                                           | alpha-glucosidase inhibitor               | 1 | YP  | [98-99]                                         |
| 9549 | Alpha-glucosidase inhibitor                                           | alpha-glucosidase inhibitor               | 1 | YPG | [98-100]                                        |
| 9650 | Alpha-glucosidase inhibitor                                           | alpha-glucosidase inhibitor               | 3 | EA  | [42-43],[47-48],[210-211]                       |
| 9693 | Alpha-glucosidase inhibitor                                           | alpha-glucosidase inhibitor               | 3 | VE  | [39-40],[46-47],[320-321]                       |
| 9694 | Alpha-glucosidase inhibitor                                           | alpha-glucosidase inhibitor               | 3 | PE  | [102-103],[297-298],[417-418]                   |
| 9695 | Alpha-glucosidase inhibitor                                           | alpha-glucosidase inhibitor               | 1 | AD  | [292-293]                                       |

|      |                                                      |                                   |   |     |                                                 |
|------|------------------------------------------------------|-----------------------------------|---|-----|-------------------------------------------------|
| 3171 | dipeptidyl peptidase IV inhibitor (DPP IV inhibitor) | dipeptidyl peptidase IV inhibitor | 1 | MP  | [416-417]                                       |
| 3172 | dipeptidyl peptidase IV inhibitor (DPP IV inhibitor) | dipeptidyl peptidase IV inhibitor | 2 | VA  | [61-62],[142-143]                               |
| 3175 | dipeptidyl peptidase IV inhibitor (DPP IV inhibitor) | dipeptidyl peptidase IV inhibitor | 5 | LA  | [13-14],[178-179],[208-209],[406-407],[421-422] |
| 3176 | dipeptidyl peptidase IV inhibitor (DPP IV inhibitor) | dipeptidyl peptidase IV inhibitor | 1 | FA  | [379-380]                                       |
| 3177 | dipeptidyl peptidase IV inhibitor (DPP IV inhibitor) | dipeptidyl peptidase IV inhibitor | 2 | AP  | [81-82],[107-108]                               |
| 3179 | dipeptidyl peptidase IV inhibitor (DPP IV inhibitor) | dipeptidyl peptidase IV inhibitor | 2 | PA  | [139-140],[289-290]                             |
| 3180 | dipeptidyl peptidase IV inhibitor (DPP IV inhibitor) | dipeptidyl peptidase IV inhibitor | 3 | LP  | [75-76],[310-311],[332-333]                     |
| 3181 | dipeptidyl peptidase IV inhibitor (DPP IV inhibitor) | dipeptidyl peptidase IV inhibitor | 1 | VP  | [375-376]                                       |
| 3182 | dipeptidyl peptidase IV inhibitor (DPP IV inhibitor) | dipeptidyl peptidase IV inhibitor | 4 | LL  | [73-74],[74-75],[159-160],[207-208]             |
| 3183 | dipeptidyl peptidase IV inhibitor (DPP IV inhibitor) | dipeptidyl peptidase IV inhibitor | 5 | VV  | [87-88],[154-155],[354-355],[374-375],[381-382] |
| 8304 | Dipeptidyl peptidase IV inhibitor (DPP IV inhibitor) | dipeptidyl peptidase IV inhibitor | 1 | IPA | [138-140]                                       |
| 8501 | Dipeptidyl peptidase IV inhibitor (DPP IV inhibitor) | dipeptidyl peptidase IV inhibitor | 1 | IP  | [138-139]                                       |
| 8503 | Dipeptidyl peptidase IV inhibitor (DPP IV inhibitor) | dipeptidyl peptidase IV inhibitor | 2 | TP  | [172-173],[296-297]                             |
| 8505 | Dipeptidyl peptidase IV inhibitor (DPP IV inhibitor) | dipeptidyl peptidase IV inhibitor | 2 | SP  | [152-153],[404-405]                             |
| 8518 | dipeptidyl peptidase IV inhibitor (DPP IV inhibitor) | dipeptidyl peptidase IV inhibitor | 1 | RP  | [243-244]                                       |
| 8521 | dipeptidyl peptidase IV inhibitor (DPP IV inhibitor) | dipeptidyl peptidase IV inhibitor | 1 | YP  | [98-99]                                         |
| 8525 | dipeptidyl peptidase IV inhibitor (DPP IV inhibitor) | dipeptidyl peptidase IV inhibitor | 1 | IA  | [136-137]                                       |
| 8526 | dipeptidyl peptidase IV inhibitor (DPP IV inhibitor) | dipeptidyl peptidase IV inhibitor | 3 | RA  | [291-292],[384-385],[400-401]                   |
| 8529 | dipeptidyl peptidase IV inhibitor (DPP IV inhibitor) | dipeptidyl peptidase IV inhibitor | 1 | EP  | [34-35]                                         |
| 8530 | dipeptidyl peptidase IV inhibitor (DPP IV inhibitor) | dipeptidyl peptidase IV inhibitor | 1 | NP  | [181-182]                                       |
| 8532 | dipeptidyl peptidase IV inhibitor (DPP IV inhibitor) | dipeptidyl peptidase IV inhibitor | 1 | QP  | [69-70]                                         |
| 8555 | dipeptidyl peptidase IV inhibitor (DPP IV inhibitor) | dipeptidyl peptidase IV inhibitor | 1 | FL  | [5-6]                                           |
| 8557 | dipeptidyl peptidase IV inhibitor (DPP IV inhibitor) | dipeptidyl peptidase IV inhibitor | 1 | HL  | [177-178]                                       |
| 8558 | dipeptidyl peptidase IV inhibitor (DPP IV inhibitor) | dipeptidyl peptidase IV inhibitor | 2 | EK  | [262-263],[321-322]                             |
| 8559 | dipeptidyl peptidase IV inhibitor (DPP IV inhibitor) | dipeptidyl peptidase IV inhibitor | 3 | AL  | [32-33],[62-63],[329-330]                       |
| 8560 | dipeptidyl peptidase IV inhibitor (DPP IV inhibitor) | dipeptidyl peptidase IV inhibitor | 1 | SL  | [307-308]                                       |
| 8561 | dipeptidyl peptidase IV inhibitor (DPP IV inhibitor) | dipeptidyl peptidase IV inhibitor | 1 | GL  | [72-73]                                         |
| 8594 | dipeptidyl peptidase IV inhibitor (DPP IV inhibitor) | dipeptidyl peptidase IV inhibitor | 2 | VR  | [64-65],[367-368]                               |
| 8638 | dipeptidyl peptidase IV inhibitor (DPP IV inhibitor) | dipeptidyl peptidase IV inhibitor | 1 | PL  | [405-406]                                       |
| 8677 | dipeptidyl peptidase IV inhibitor (DPP IV inhibitor) | dipeptidyl peptidase IV inhibitor | 1 | WL  | [315-316]                                       |
| 8678 | dipeptidyl peptidase IV inhibitor (DPP IV inhibitor) | dipeptidyl peptidase IV inhibitor | 1 | WQ  | [19-20]                                         |
| 8679 | dipeptidyl peptidase IV inhibitor (DPP IV inhibitor) | dipeptidyl peptidase IV inhibitor | 1 | WI  | [392-393]                                       |

|      |                                                      |                                   |   |     |                                               |
|------|------------------------------------------------------|-----------------------------------|---|-----|-----------------------------------------------|
| 8680 | dipeptidyl peptidase IV inhibitor (DPP IV inhibitor) | dipeptidyl peptidase IV inhibitor | 1 | WN  | [335-336]                                     |
| 8684 | dipeptidyl peptidase IV inhibitor (DPP IV inhibitor) | dipeptidyl peptidase IV inhibitor | 1 | WC  | [145-146]                                     |
| 8693 | dipeptidyl peptidase IV inhibitor (DPP IV inhibitor) | dipeptidyl peptidase IV inhibitor | 1 | IQP | [68-70]                                       |
| 8695 | dipeptidyl peptidase IV inhibitor (DPP IV inhibitor) | dipeptidyl peptidase IV inhibitor | 1 | AW  | [48-49]                                       |
| 8696 | dipeptidyl peptidase IV inhibitor (DPP IV inhibitor) | dipeptidyl peptidase IV inhibitor | 1 | YT  | [295-296]                                     |
| 8697 | dipeptidyl peptidase IV inhibitor (DPP IV inhibitor) | dipeptidyl peptidase IV inhibitor | 1 | WG  | [266-267]                                     |
| 8757 | dipeptidyl peptidase IV inhibitor (DPP IV inhibitor) | dipeptidyl peptidase IV inhibitor | 1 | AD  | [292-293]                                     |
| 8758 | dipeptidyl peptidase IV inhibitor (DPP IV inhibitor) | dipeptidyl peptidase IV inhibitor | 1 | AE  | [209-210]                                     |
| 8759 | dipeptidyl peptidase IV inhibitor (DPP IV inhibitor) | dipeptidyl peptidase IV inhibitor | 2 | AF  | [211-212],[424-425]                           |
| 8760 | dipeptidyl peptidase IV inhibitor (DPP IV inhibitor) | dipeptidyl peptidase IV inhibitor | 5 | AG  | [43-44],[59-60],[140-141],[179-180],[407-408] |
| 8761 | dipeptidyl peptidase IV inhibitor (DPP IV inhibitor) | dipeptidyl peptidase IV inhibitor | 1 | AH  | [143-144]                                     |
| 8762 | dipeptidyl peptidase IV inhibitor (DPP IV inhibitor) | dipeptidyl peptidase IV inhibitor | 1 | AS  | [14-15]                                       |
| 8764 | dipeptidyl peptidase IV inhibitor (DPP IV inhibitor) | dipeptidyl peptidase IV inhibitor | 1 | AV  | [380-381]                                     |
| 8766 | dipeptidyl peptidase IV inhibitor (DPP IV inhibitor) | dipeptidyl peptidase IV inhibitor | 4 | DN  | [36-37],[226-227],[270-271],[356-357]         |
| 8767 | dipeptidyl peptidase IV inhibitor (DPP IV inhibitor) | dipeptidyl peptidase IV inhibitor | 2 | DP  | [50-51],[288-289]                             |
| 8769 | dipeptidyl peptidase IV inhibitor (DPP IV inhibitor) | dipeptidyl peptidase IV inhibitor | 4 | DR  | [28-29],[122-123],[170-171],[399-400]         |
| 8770 | dipeptidyl peptidase IV inhibitor (DPP IV inhibitor) | dipeptidyl peptidase IV inhibitor | 3 | EG  | [91-92],[149-150],[369-370]                   |
| 8773 | dipeptidyl peptidase IV inhibitor (DPP IV inhibitor) | dipeptidyl peptidase IV inhibitor | 3 | ES  | [254-255],[258-259],[448-449]                 |
| 8774 | dipeptidyl peptidase IV inhibitor (DPP IV inhibitor) | dipeptidyl peptidase IV inhibitor | 2 | ET  | [103-104],[275-276]                           |
| 8775 | dipeptidyl peptidase IV inhibitor (DPP IV inhibitor) | dipeptidyl peptidase IV inhibitor | 3 | EV  | [298-299],[366-367],[419-420]                 |
| 8776 | dipeptidyl peptidase IV inhibitor (DPP IV inhibitor) | dipeptidyl peptidase IV inhibitor | 2 | EW  | [18-19],[391-392]                             |
| 8777 | dipeptidyl peptidase IV inhibitor (DPP IV inhibitor) | dipeptidyl peptidase IV inhibitor | 1 | EY  | [40-41]                                       |
| 8778 | dipeptidyl peptidase IV inhibitor (DPP IV inhibitor) | dipeptidyl peptidase IV inhibitor | 1 | FN  | [437-438]                                     |
| 8779 | dipeptidyl peptidase IV inhibitor (DPP IV inhibitor) | dipeptidyl peptidase IV inhibitor | 4 | FQ  | [120-121],[186-187],[212-213],[425-426]       |
| 8780 | dipeptidyl peptidase IV inhibitor (DPP IV inhibitor) | dipeptidyl peptidase IV inhibitor | 2 | FR  | [56-57],[130-131]                             |
| 8781 | dipeptidyl peptidase IV inhibitor (DPP IV inhibitor) | dipeptidyl peptidase IV inhibitor | 3 | GE  | [90-91],[365-366],[447-448]                   |
| 8782 | dipeptidyl peptidase IV inhibitor (DPP IV inhibitor) | dipeptidyl peptidase IV inhibitor | 1 | GF  | [202-203]                                     |
| 8783 | dipeptidyl peptidase IV inhibitor (DPP IV inhibitor) | dipeptidyl peptidase IV inhibitor | 2 | GG  | [229-230],[414-415]                           |
| 8785 | dipeptidyl peptidase IV inhibitor (DPP IV inhibitor) | dipeptidyl peptidase IV inhibitor | 3 | GI  | [95-96],[230-231],[272-273]                   |
| 8786 | dipeptidyl peptidase IV inhibitor (DPP IV inhibitor) | dipeptidyl peptidase IV inhibitor | 3 | GV  | [60-61],[141-142],[323-324]                   |
| 8790 | dipeptidyl peptidase IV inhibitor (DPP IV inhibitor) | dipeptidyl peptidase IV inhibitor | 1 | HE  | [53-54]                                       |
| 8792 | dipeptidyl peptidase IV inhibitor (DPP IV inhibitor) | dipeptidyl peptidase IV inhibitor | 1 | HH  | [451-452]                                     |

|      |                                                      |                                   |   |    |                               |
|------|------------------------------------------------------|-----------------------------------|---|----|-------------------------------|
| 8795 | dipeptidyl peptidase IV inhibitor (DPP IV inhibitor) | dipeptidyl peptidase IV inhibitor | 1 | HS | [340-341]                     |
| 8796 | dipeptidyl peptidase IV inhibitor (DPP IV inhibitor) | dipeptidyl peptidase IV inhibitor | 1 | HT | [66-67]                       |
| 8798 | dipeptidyl peptidase IV inhibitor (DPP IV inhibitor) | dipeptidyl peptidase IV inhibitor | 2 | HW | [144-145],[334-335]           |
| 8801 | dipeptidyl peptidase IV inhibitor (DPP IV inhibitor) | dipeptidyl peptidase IV inhibitor | 2 | II | [135-136],[342-343]           |
| 8802 | dipeptidyl peptidase IV inhibitor (DPP IV inhibitor) | dipeptidyl peptidase IV inhibitor | 2 | IL | [7-8],[312-313]               |
| 8804 | dipeptidyl peptidase IV inhibitor (DPP IV inhibitor) | dipeptidyl peptidase IV inhibitor | 1 | IN | [286-287]                     |
| 8805 | dipeptidyl peptidase IV inhibitor (DPP IV inhibitor) | dipeptidyl peptidase IV inhibitor | 1 | IQ | [68-69]                       |
| 8806 | dipeptidyl peptidase IV inhibitor (DPP IV inhibitor) | dipeptidyl peptidase IV inhibitor | 2 | IR | [127-128],[242-243]           |
| 8808 | dipeptidyl peptidase IV inhibitor (DPP IV inhibitor) | dipeptidyl peptidase IV inhibitor | 1 | KE | [283-284]                     |
| 8809 | dipeptidyl peptidase IV inhibitor (DPP IV inhibitor) | dipeptidyl peptidase IV inhibitor | 2 | KF | [175-176],[436-437]           |
| 8810 | dipeptidyl peptidase IV inhibitor (DPP IV inhibitor) | dipeptidyl peptidase IV inhibitor | 3 | KG | [322-323],[347-348],[349-350] |
| 8812 | dipeptidyl peptidase IV inhibitor (DPP IV inhibitor) | dipeptidyl peptidase IV inhibitor | 2 | KI | [126-127],[434-435]           |
| 8814 | dipeptidyl peptidase IV inhibitor (DPP IV inhibitor) | dipeptidyl peptidase IV inhibitor | 2 | KR | [263-264],[383-384]           |
| 8815 | dipeptidyl peptidase IV inhibitor (DPP IV inhibitor) | dipeptidyl peptidase IV inhibitor | 1 | KS | [223-224]                     |
| 8816 | dipeptidyl peptidase IV inhibitor (DPP IV inhibitor) | dipeptidyl peptidase IV inhibitor | 1 | KT | [396-397]                     |
| 8817 | dipeptidyl peptidase IV inhibitor (DPP IV inhibitor) | dipeptidyl peptidase IV inhibitor | 1 | KV | [233-234]                     |
| 8818 | dipeptidyl peptidase IV inhibitor (DPP IV inhibitor) | dipeptidyl peptidase IV inhibitor | 1 | KW | [314-315]                     |
| 8821 | dipeptidyl peptidase IV inhibitor (DPP IV inhibitor) | dipeptidyl peptidase IV inhibitor | 3 | LI | [6-7],[84-85],[218-219]       |
| 8823 | dipeptidyl peptidase IV inhibitor (DPP IV inhibitor) | dipeptidyl peptidase IV inhibitor | 3 | LN | [305-306],[308-309],[337-338] |
| 8824 | dipeptidyl peptidase IV inhibitor (DPP IV inhibitor) | dipeptidyl peptidase IV inhibitor | 2 | LT | [302-303],[444-445]           |
| 8825 | dipeptidyl peptidase IV inhibitor (DPP IV inhibitor) | dipeptidyl peptidase IV inhibitor | 3 | LV | [63-64],[330-331],[373-374]   |
| 8832 | dipeptidyl peptidase IV inhibitor (DPP IV inhibitor) | dipeptidyl peptidase IV inhibitor | 1 | ML | [372-373]                     |
| 8836 | dipeptidyl peptidase IV inhibitor (DPP IV inhibitor) | dipeptidyl peptidase IV inhibitor | 2 | MR | [280-281],[453-454]           |
| 8839 | dipeptidyl peptidase IV inhibitor (DPP IV inhibitor) | dipeptidyl peptidase IV inhibitor | 3 | NA | [80-81],[328-329],[423-424]   |
| 8840 | dipeptidyl peptidase IV inhibitor (DPP IV inhibitor) | dipeptidyl peptidase IV inhibitor | 2 | ND | [287-288],[398-399]           |
| 8841 | dipeptidyl peptidase IV inhibitor (DPP IV inhibitor) | dipeptidyl peptidase IV inhibitor | 1 | NE | [148-149]                     |
| 8842 | dipeptidyl peptidase IV inhibitor (DPP IV inhibitor) | dipeptidyl peptidase IV inhibitor | 2 | NF | [357-358],[378-379]           |
| 8843 | dipeptidyl peptidase IV inhibitor (DPP IV inhibitor) | dipeptidyl peptidase IV inhibitor | 2 | NG | [71-72],[271-272]             |
| 8844 | dipeptidyl peptidase IV inhibitor (DPP IV inhibitor) | dipeptidyl peptidase IV inhibitor | 1 | NH | [52-53]                       |
| 8845 | dipeptidyl peptidase IV inhibitor (DPP IV inhibitor) | dipeptidyl peptidase IV inhibitor | 3 | NL | [198-199],[309-310],[336-337] |
| 8847 | dipeptidyl peptidase IV inhibitor (DPP IV inhibitor) | dipeptidyl peptidase IV inhibitor | 1 | NN | [438-439]                     |
| 8848 | dipeptidyl peptidase IV inhibitor (DPP IV inhibitor) | dipeptidyl peptidase IV inhibitor | 2 | NQ | [167-168],[439-440]           |

|      |                                                      |                                   |   |    |                                                                                       |
|------|------------------------------------------------------|-----------------------------------|---|----|---------------------------------------------------------------------------------------|
| 8849 | dipeptidyl peptidase IV inhibitor (DPP IV inhibitor) | dipeptidyl peptidase IV inhibitor | 3 | NR | [37-38],[227-228],[360-361]                                                           |
| 8855 | dipeptidyl peptidase IV inhibitor (DPP IV inhibitor) | dipeptidyl peptidase IV inhibitor | 1 | PG | [99-100]                                                                              |
| 8856 | dipeptidyl peptidase IV inhibitor (DPP IV inhibitor) | dipeptidyl peptidase IV inhibitor | 1 | PH | [333-334]                                                                             |
| 8857 | dipeptidyl peptidase IV inhibitor (DPP IV inhibitor) | dipeptidyl peptidase IV inhibitor | 1 | PI | [311-312]                                                                             |
| 8858 | dipeptidyl peptidase IV inhibitor (DPP IV inhibitor) | dipeptidyl peptidase IV inhibitor | 1 | PK | [182-183]                                                                             |
| 8860 | dipeptidyl peptidase IV inhibitor (DPP IV inhibitor) | dipeptidyl peptidase IV inhibitor | 2 | PN | [51-52],[70-71]                                                                       |
| 8861 | dipeptidyl peptidase IV inhibitor (DPP IV inhibitor) | dipeptidyl peptidase IV inhibitor | 4 | PQ | [76-77],[82-83],[108-109],[376-377]                                                   |
| 8862 | dipeptidyl peptidase IV inhibitor (DPP IV inhibitor) | dipeptidyl peptidase IV inhibitor | 1 | PS | [244-245]                                                                             |
| 8864 | dipeptidyl peptidase IV inhibitor (DPP IV inhibitor) | dipeptidyl peptidase IV inhibitor | 1 | PV | [153-154]                                                                             |
| 8867 | dipeptidyl peptidase IV inhibitor (DPP IV inhibitor) | dipeptidyl peptidase IV inhibitor | 1 | QA | [106-107]                                                                             |
| 8868 | dipeptidyl peptidase IV inhibitor (DPP IV inhibitor) | dipeptidyl peptidase IV inhibitor | 2 | QD | [22-23],[121-122]                                                                     |
| 8869 | dipeptidyl peptidase IV inhibitor (DPP IV inhibitor) | dipeptidyl peptidase IV inhibitor | 1 | QE | [17-18]                                                                               |
| 8870 | dipeptidyl peptidase IV inhibitor (DPP IV inhibitor) | dipeptidyl peptidase IV inhibitor | 1 | QF | [55-56]                                                                               |
| 8871 | dipeptidyl peptidase IV inhibitor (DPP IV inhibitor) | dipeptidyl peptidase IV inhibitor | 3 | QG | [89-90],[110-111],[114-115]                                                           |
| 8872 | dipeptidyl peptidase IV inhibitor (DPP IV inhibitor) | dipeptidyl peptidase IV inhibitor | 1 | QH | [191-192]                                                                             |
| 8873 | dipeptidyl peptidase IV inhibitor (DPP IV inhibitor) | dipeptidyl peptidase IV inhibitor | 2 | QI | [26-27],[426-427]                                                                     |
| 8874 | dipeptidyl peptidase IV inhibitor (DPP IV inhibitor) | dipeptidyl peptidase IV inhibitor | 4 | QL | [83-84],[168-169],[221-222],[317-318]                                                 |
| 8875 | dipeptidyl peptidase IV inhibitor (DPP IV inhibitor) | dipeptidyl peptidase IV inhibitor | 2 | QN | [166-167],[377-378]                                                                   |
| 8876 | dipeptidyl peptidase IV inhibitor (DPP IV inhibitor) | dipeptidyl peptidase IV inhibitor | 9 | QQ | [20-21],[21-22],[109-110],[113-114],[187-188],[188-189],[189-190],[190-191],[440-441] |
| 8877 | dipeptidyl peptidase IV inhibitor (DPP IV inhibitor) | dipeptidyl peptidase IV inhibitor | 3 | QS | [116-117],[193-194],[248-249]                                                         |
| 8878 | dipeptidyl peptidase IV inhibitor (DPP IV inhibitor) | dipeptidyl peptidase IV inhibitor | 1 | QT | [441-442]                                                                             |
| 8879 | dipeptidyl peptidase IV inhibitor (DPP IV inhibitor) | dipeptidyl peptidase IV inhibitor | 3 | QV | [213-214],[351-352],[353-354]                                                         |
| 8881 | dipeptidyl peptidase IV inhibitor (DPP IV inhibitor) | dipeptidyl peptidase IV inhibitor | 1 | QY | [77-78]                                                                               |
| 8882 | dipeptidyl peptidase IV inhibitor (DPP IV inhibitor) | dipeptidyl peptidase IV inhibitor | 4 | RG | [132-133],[195-196],[228-229],[251-252]                                               |
| 8883 | dipeptidyl peptidase IV inhibitor (DPP IV inhibitor) | dipeptidyl peptidase IV inhibitor | 2 | RH | [65-66],[123-124]                                                                     |
| 8885 | dipeptidyl peptidase IV inhibitor (DPP IV inhibitor) | dipeptidyl peptidase IV inhibitor | 2 | RK | [174-175],[433-434]                                                                   |
| 8886 | dipeptidyl peptidase IV inhibitor (DPP IV inhibitor) | dipeptidyl peptidase IV inhibitor | 4 | RL | [29-30],[217-218],[281-282],[301-302]                                                 |
| 8888 | dipeptidyl peptidase IV inhibitor (DPP IV inhibitor) | dipeptidyl peptidase IV inhibitor | 1 | RN | [197-198]                                                                             |
| 8889 | dipeptidyl peptidase IV inhibitor (DPP IV inhibitor) | dipeptidyl peptidase IV inhibitor | 3 | RR | [128-129],[131-132],[264-265]                                                         |
| 8890 | dipeptidyl peptidase IV inhibitor (DPP IV inhibitor) | dipeptidyl peptidase IV inhibitor | 1 | RW | [265-266]                                                                             |
| 8891 | dipeptidyl peptidase IV inhibitor (DPP IV inhibitor) | dipeptidyl peptidase IV inhibitor | 1 | SF | [394-395]                                                                             |

|      |                                                      |                                   |   |    |                                         |
|------|------------------------------------------------------|-----------------------------------|---|----|-----------------------------------------|
| 8892 | dipeptidyl peptidase IV inhibitor (DPP IV inhibitor) | dipeptidyl peptidase IV inhibitor | 2 | SH | [339-340],[450-451]                     |
| 8893 | dipeptidyl peptidase IV inhibitor (DPP IV inhibitor) | dipeptidyl peptidase IV inhibitor | 1 | SI | [341-342]                               |
| 8895 | dipeptidyl peptidase IV inhibitor (DPP IV inhibitor) | dipeptidyl peptidase IV inhibitor | 3 | SV | [2-3],[319-320],[411-412]               |
| 8897 | dipeptidyl peptidase IV inhibitor (DPP IV inhibitor) | dipeptidyl peptidase IV inhibitor | 1 | SY | [97-98]                                 |
| 8899 | dipeptidyl peptidase IV inhibitor (DPP IV inhibitor) | dipeptidyl peptidase IV inhibitor | 1 | TE | [205-206]                               |
| 8901 | dipeptidyl peptidase IV inhibitor (DPP IV inhibitor) | dipeptidyl peptidase IV inhibitor | 1 | TG | [94-95]                                 |
| 8903 | dipeptidyl peptidase IV inhibitor (DPP IV inhibitor) | dipeptidyl peptidase IV inhibitor | 2 | TI | [67-68],[276-277]                       |
| 8905 | dipeptidyl peptidase IV inhibitor (DPP IV inhibitor) | dipeptidyl peptidase IV inhibitor | 3 | TL | [158-159],[304-305],[443-444]           |
| 8906 | dipeptidyl peptidase IV inhibitor (DPP IV inhibitor) | dipeptidyl peptidase IV inhibitor | 1 | TM | [279-280]                               |
| 8907 | dipeptidyl peptidase IV inhibitor (DPP IV inhibitor) | dipeptidyl peptidase IV inhibitor | 1 | TN | [397-398]                               |
| 8910 | dipeptidyl peptidase IV inhibitor (DPP IV inhibitor) | dipeptidyl peptidase IV inhibitor | 3 | TS | [403-404],[410-411],[445-446]           |
| 8911 | dipeptidyl peptidase IV inhibitor (DPP IV inhibitor) | dipeptidyl peptidase IV inhibitor | 2 | TT | [303-304],[442-443]                     |
| 8912 | dipeptidyl peptidase IV inhibitor (DPP IV inhibitor) | dipeptidyl peptidase IV inhibitor | 2 | TV | [45-46],[156-157]                       |
| 8914 | dipeptidyl peptidase IV inhibitor (DPP IV inhibitor) | dipeptidyl peptidase IV inhibitor | 1 | TY | [104-105]                               |
| 8915 | dipeptidyl peptidase IV inhibitor (DPP IV inhibitor) | dipeptidyl peptidase IV inhibitor | 2 | VD | [214-215],[355-356]                     |
| 8916 | dipeptidyl peptidase IV inhibitor (DPP IV inhibitor) | dipeptidyl peptidase IV inhibitor | 3 | VE | [39-40],[46-47],[320-321]               |
| 8917 | dipeptidyl peptidase IV inhibitor (DPP IV inhibitor) | dipeptidyl peptidase IV inhibitor | 2 | VF | [185-186],[362-363]                     |
| 8918 | dipeptidyl peptidase IV inhibitor (DPP IV inhibitor) | dipeptidyl peptidase IV inhibitor | 1 | VG | [299-300]                               |
| 8920 | dipeptidyl peptidase IV inhibitor (DPP IV inhibitor) | dipeptidyl peptidase IV inhibitor | 1 | VI | [241-242]                               |
| 8921 | dipeptidyl peptidase IV inhibitor (DPP IV inhibitor) | dipeptidyl peptidase IV inhibitor | 3 | VK | [232-233],[234-235],[382-383]           |
| 8922 | dipeptidyl peptidase IV inhibitor (DPP IV inhibitor) | dipeptidyl peptidase IV inhibitor | 4 | VL | [324-325],[331-332],[412-413],[420-421] |
| 8925 | dipeptidyl peptidase IV inhibitor (DPP IV inhibitor) | dipeptidyl peptidase IV inhibitor | 2 | VQ | [88-89],[352-353]                       |
| 8926 | dipeptidyl peptidase IV inhibitor (DPP IV inhibitor) | dipeptidyl peptidase IV inhibitor | 1 | VS | [162-163]                               |
| 8927 | dipeptidyl peptidase IV inhibitor (DPP IV inhibitor) | dipeptidyl peptidase IV inhibitor | 2 | VT | [155-156],[157-158]                     |
| 8930 | dipeptidyl peptidase IV inhibitor (DPP IV inhibitor) | dipeptidyl peptidase IV inhibitor | 1 | WD | [49-50]                                 |
| 8934 | dipeptidyl peptidase IV inhibitor (DPP IV inhibitor) | dipeptidyl peptidase IV inhibitor | 1 | YE | [41-42]                                 |
| 8936 | dipeptidyl peptidase IV inhibitor (DPP IV inhibitor) | dipeptidyl peptidase IV inhibitor | 1 | YG | [344-345]                               |
| 8939 | dipeptidyl peptidase IV inhibitor (DPP IV inhibitor) | dipeptidyl peptidase IV inhibitor | 1 | YK | [326-327]                               |
| 8942 | dipeptidyl peptidase IV inhibitor (DPP IV inhibitor) | dipeptidyl peptidase IV inhibitor | 1 | YN | [147-148]                               |
| 8943 | dipeptidyl peptidase IV inhibitor (DPP IV inhibitor) | dipeptidyl peptidase IV inhibitor | 1 | YQ | [105-106]                               |
| 8945 | dipeptidyl peptidase IV inhibitor (DPP IV inhibitor) | dipeptidyl peptidase IV inhibitor | 1 | YS | [78-79]                                 |
| 8946 | dipeptidyl peptidase IV inhibitor (DPP IV inhibitor) | dipeptidyl peptidase IV inhibitor | 1 | YV | [86-87]                                 |

|      |                                   |                                    |   |     |                                                 |
|------|-----------------------------------|------------------------------------|---|-----|-------------------------------------------------|
| 9339 | Dipeptidyl peptidase IV inhibitor | dipeptidyl peptidase IV inhibitor  | 1 | LPQ | [75-77]                                         |
| 9477 | DPP-III inhibitor                 | dipeptidyl peptidase III inhibitor | 1 | RW  | [265-266]                                       |
| 9478 | DPP-III inhibitor                 | dipeptidyl peptidase III inhibitor | 1 | LR  | [239-240]                                       |
| 9479 | DPP-III inhibitor                 | dipeptidyl peptidase III inhibitor | 2 | MR  | [280-281],[453-454]                             |
| 9483 | DPP-III inhibitor                 | dipeptidyl peptidase III inhibitor | 1 | YK  | [326-327]                                       |
| 9485 | DPP-III inhibitor                 | dipeptidyl peptidase III inhibitor | 3 | RR  | [128-129],[131-132],[264-265]                   |
| 9487 | DPP-III inhibitor                 | dipeptidyl peptidase III inhibitor | 3 | GE  | [90-91],[365-366],[447-448]                     |
| 9488 | DPP-III inhibitor                 | dipeptidyl peptidase III inhibitor | 1 | GF  | [202-203]                                       |
| 9489 | DPP-III inhibitor                 | dipeptidyl peptidase III inhibitor | 1 | PR  | [173-174]                                       |
| 9490 | DPP-III inhibitor                 | dipeptidyl peptidase III inhibitor | 3 | RF  | [119-120],[129-130],[389-390]                   |
| 9491 | DPP-III inhibitor                 | dipeptidyl peptidase III inhibitor | 3 | RV  | [38-39],[240-241],[361-362]                     |
| 9492 | DPP-III inhibitor                 | dipeptidyl peptidase III inhibitor | 3 | DA  | [31-32],[431-432],[456-457]                     |
| 9493 | DPP-III inhibitor                 | dipeptidyl peptidase III inhibitor | 1 | HL  | [177-178]                                       |
| 9499 | DPP-III inhibitor                 | dipeptidyl peptidase III inhibitor | 5 | LA  | [13-14],[178-179],[208-209],[406-407],[421-422] |
| 9500 | DPP-III inhibitor                 | dipeptidyl peptidase III inhibitor | 1 | FA  | [379-380]                                       |
| 9501 | DPP-III inhibitor                 | dipeptidyl peptidase III inhibitor | 2 | FR  | [56-57],[130-131]                               |
| 9502 | DPP-III inhibitor                 | dipeptidyl peptidase III inhibitor | 1 | FL  | [5-6]                                           |
| 9504 | DPP-III inhibitor                 | dipeptidyl peptidase III inhibitor | 3 | PE  | [102-103],[297-298],[417-418]                   |
| 9508 | DPP-III inhibitor                 | dipeptidyl peptidase III inhibitor | 1 | YG  | [344-345]                                       |
| 8247 | CaMPDE inhibitor                  | CaMPDE inhibitor                   | 2 | IR  | [127-128],[242-243]                             |
| 8249 | CaMPDE inhibitor                  | CaMPDE inhibitor                   | 2 | KF  | [175-176],[436-437]                             |
| 2842 | Renin inhibitor                   | renin inhibitor                    | 1 | LR  | [239-240]                                       |
| 8246 | renin inhibitor                   | renin inhibitor                    | 2 | IR  | [127-128],[242-243]                             |
| 8248 | Renin inhibitor                   | renin inhibitor                    | 2 | KF  | [175-176],[436-437]                             |
| 9430 | Renin inhibitor                   | renin inhibitor                    | 3 | NR  | [37-38],[227-228],[360-361]                     |
| 9431 | Renin inhibitor                   | renin inhibitor                    | 1 | QF  | [55-56]                                         |
| 9432 | Renin inhibitor                   | renin inhibitor                    | 1 | SF  | [394-395]                                       |
| 9470 | Renin inhibitor                   | renin inhibitor                    | 1 | LY  | [325-326]                                       |

Table S9. Profile of potential biological activity of fragments of protein Ana o 3.0101.

| ID   | Name of peptide                     | Activity      | Number | Sequence | Location                          |
|------|-------------------------------------|---------------|--------|----------|-----------------------------------|
| 3380 | ACE inhibitor                       | ACE inhibitor | 2      | RY       | [54-55],[65-66]                   |
| 3381 | ACE inhibitor                       | ACE inhibitor | 1      | LY       | [113-114]                         |
| 3383 | ACE inhibitor                       | ACE inhibitor | 1      | IY       | [22-23]                           |
| 3489 | ACE inhibitor from sake lees        | ACE inhibitor | 1      | RF       | [48-49]                           |
| 3537 | ACE inhibitor                       | ACE inhibitor | 1      | PR       | [121-122]                         |
| 3714 | ACE inhibitor                       | ACE inhibitor | 1      | LQQ      | [99-101]                          |
| 7558 | ACE inhibitor from buckwheat        | ACE inhibitor | 1      | VK       | [56-57]                           |
| 7583 | ACE inhibitor                       | ACE inhibitor | 1      | AF       | [10-11]                           |
| 7588 | ACE inhibitor                       | ACE inhibitor | 1      | RA       | [24-25]                           |
| 7592 | ACE inhibitor                       | ACE inhibitor | 1      | FR       | [49-50]                           |
| 7603 | ACE inhibitor                       | ACE inhibitor | 2      | GR       | [34-35],[64-65]                   |
| 7604 | ACE inhibitor                       | ACE inhibitor | 1      | KG       | [106-107]                         |
| 7615 | ACE inhibitor                       | ACE inhibitor | 1      | GE       | [107-108]                         |
| 7616 | ACE inhibitor                       | ACE inhibitor | 1      | GG       | [63-64]                           |
| 7617 | ACE inhibitor                       | ACE inhibitor | 1      | QG       | [130-131]                         |
| 7618 | ACE inhibitor                       | ACE inhibitor | 1      | SG       | [33-34]                           |
| 7628 | ACE inhibitor from k-CN (fr. 67-68) | ACE inhibitor | 2      | VR       | [96-97],[110-111]                 |
| 7684 | ACE inhibitor from garlic           | ACE inhibitor | 1      | SY       | [137-138]                         |
| 7692 | ACE inhibitor                       | ACE inhibitor | 1      | KF       | [3-4]                             |
| 7741 | ACE inhibitor                       | ACE inhibitor | 1      | RR       | [85-86]                           |
| 7828 | ACE inhibitor                       | ACE inhibitor | 4      | EV       | [28-29],[59-60],[82-83],[109-110] |
| 7829 | ACE inhibitor                       | ACE inhibitor | 2      | VE       | [27-28],[29-30]                   |
| 7831 | ACE inhibitor                       | ACE inhibitor | 2      | LQ       | [80-81],[99-100]                  |
| 8193 | ACE inhibitor                       | ACE inhibitor | 1      | AI       | [25-26]                           |
| 8951 | ACE inhibitor                       | ACE inhibitor | 1      | AV       | [12-13]                           |
| 9060 | ACE inhibitor                       | ACE inhibitor | 1      | AVL      | [12-14]                           |
| 9076 | ACE inhibitor                       | ACE inhibitor | 1      | FQ       | [134-135]                         |
| 9077 | ACE inhibitor                       | ACE inhibitor | 1      | YV       | [55-56]                           |
| 9078 | ACE inhibitor                       | ACE inhibitor | 1      | YE       | [114-115]                         |



|      |                                                                      |                                           |   |     |                                   |
|------|----------------------------------------------------------------------|-------------------------------------------|---|-----|-----------------------------------|
| 9173 | ACE inhibitor                                                        | ACE inhibitor                             | 1 | RG  | [62-63]                           |
| 9185 | ACE inhibitor                                                        | ACE inhibitor                             | 1 | YN  | [66-67]                           |
| 9213 | ACE inhibitor                                                        | ACE inhibitor                             | 1 | LR  | [73-74]                           |
| 9755 | ACE inhibitor                                                        | ACE inhibitor                             | 1 | PRI | [121-123]                         |
| 3356 | Stimulating vasoactive substance release                             | stimulating                               | 3 | LLL | [5-7],[6-8],[14-16]               |
| 8320 | Glucose uptake stimulating peptide                                   | stimulating                               | 1 | VL  | [13-14]                           |
| 8321 | Glucose uptake stimulating peptide                                   | stimulating                               | 1 | LV  | [16-17]                           |
| 8322 | Glucose uptake stimulating peptide                                   | stimulating                               | 1 | IV  | [26-27]                           |
| 8326 | Glucose uptake stimulating peptide                                   | stimulating                               | 5 | LL  | [5-6],[6-7],[7-8],[14-15],[15-16] |
| 8329 | Stimulating vasoactive substance release                             | stimulating                               | 3 | EE  | [30-31],[44-45],[108-109]         |
| 8330 | Stimulating vasoactive substance release                             | stimulating                               | 1 | SE  | [118-119]                         |
| 9534 | Kyotorphin                                                           | neuropeptide                              | 1 | YR  | [23-24]                           |
| 7872 | peptide from soybean protein isolates: beta-conglycinin and glycinin | antioxidative                             | 1 | LY  | [113-114]                         |
| 7873 | peptide from soybean protein isolates: beta-conglycinin and glycinin | antioxidative                             | 1 | IY  | [22-23]                           |
| 7888 | antioxidative peptide                                                | antioxidative                             | 3 | EL  | [79-80],[112-113],[119-120]       |
| 4005 |                                                                      | activating ubiquitin-mediated proteolysis | 1 | RA  | [24-25]                           |
| 9693 | Alpha-glucosidase inhibitor                                          | alpha-glucosidase inhibitor               | 2 | VE  | [27-28],[29-30]                   |
| 3172 | dipeptidyl peptidase IV inhibitor (DPP IV inhibitor)                 | dipeptidyl peptidase IV inhibitor         | 1 | VA  | [17-18]                           |
| 3173 | dipeptidyl peptidase IV inhibitor (DPP IV inhibitor)                 | dipeptidyl peptidase IV inhibitor         | 1 | MA  | [1-2]                             |
| 3176 | dipeptidyl peptidase IV inhibitor (DPP IV inhibitor)                 | dipeptidyl peptidase IV inhibitor         | 1 | FA  | [11-12]                           |
| 3180 | dipeptidyl peptidase IV inhibitor (DPP IV inhibitor)                 | dipeptidyl peptidase IV inhibitor         | 1 | LP  | [120-121]                         |
| 3182 | dipeptidyl peptidase IV inhibitor (DPP IV inhibitor)                 | dipeptidyl peptidase IV inhibitor         | 5 | LL  | [5-6],[6-7],[7-8],[14-15],[15-16] |
| 8505 | Dipeptidyl peptidase IV inhibitor (DPP IV inhibitor)                 | dipeptidyl peptidase IV inhibitor         | 1 | SP  | [127-128]                         |
| 8526 | dipeptidyl peptidase IV inhibitor (DPP IV inhibitor)                 | dipeptidyl peptidase IV inhibitor         | 1 | RA  | [24-25]                           |
| 8531 | dipeptidyl peptidase IV inhibitor (DPP IV inhibitor)                 | dipeptidyl peptidase IV inhibitor         | 1 | TA  | [116-117]                         |
| 8555 | dipeptidyl peptidase IV inhibitor (DPP IV inhibitor)                 | dipeptidyl peptidase IV inhibitor         | 1 | FL  | [4-5]                             |
| 8560 | dipeptidyl peptidase IV inhibitor (DPP IV inhibitor)                 | dipeptidyl peptidase IV inhibitor         | 1 | SL  | [72-73]                           |
| 8594 | dipeptidyl peptidase IV inhibitor (DPP IV inhibitor)                 | dipeptidyl peptidase IV inhibitor         | 2 | VR  | [96-97],[110-111]                 |
| 8759 | dipeptidyl peptidase IV inhibitor (DPP IV inhibitor)                 | dipeptidyl peptidase IV inhibitor         | 1 | AF  | [10-11]                           |
| 8762 | dipeptidyl peptidase IV inhibitor (DPP IV inhibitor)                 | dipeptidyl peptidase IV inhibitor         | 2 | AS  | [20-21],[117-118]                 |
| 8764 | dipeptidyl peptidase IV inhibitor (DPP IV inhibitor)                 | dipeptidyl peptidase IV inhibitor         | 1 | AV  | [12-13]                           |
| 8769 | dipeptidyl peptidase IV inhibitor (DPP IV inhibitor)                 | dipeptidyl peptidase IV inhibitor         | 1 | DR  | [84-85]                           |

|      |                                                      |                                   |   |    |                                           |
|------|------------------------------------------------------|-----------------------------------|---|----|-------------------------------------------|
| 8773 | dipeptidyl peptidase IV inhibitor (DPP IV inhibitor) | dipeptidyl peptidase IV inhibitor | 1 | ES | [71-72]                                   |
| 8774 | dipeptidyl peptidase IV inhibitor (DPP IV inhibitor) | dipeptidyl peptidase IV inhibitor | 1 | ET | [115-116]                                 |
| 8775 | dipeptidyl peptidase IV inhibitor (DPP IV inhibitor) | dipeptidyl peptidase IV inhibitor | 4 | EV | [28-29],[59-60],[82-83],[109-110]         |
| 8779 | dipeptidyl peptidase IV inhibitor (DPP IV inhibitor) | dipeptidyl peptidase IV inhibitor | 1 | FQ | [134-135]                                 |
| 8780 | dipeptidyl peptidase IV inhibitor (DPP IV inhibitor) | dipeptidyl peptidase IV inhibitor | 1 | FR | [49-50]                                   |
| 8781 | dipeptidyl peptidase IV inhibitor (DPP IV inhibitor) | dipeptidyl peptidase IV inhibitor | 1 | GE | [107-108]                                 |
| 8783 | dipeptidyl peptidase IV inhibitor (DPP IV inhibitor) | dipeptidyl peptidase IV inhibitor | 1 | GG | [63-64]                                   |
| 8809 | dipeptidyl peptidase IV inhibitor (DPP IV inhibitor) | dipeptidyl peptidase IV inhibitor | 1 | KF | [3-4]                                     |
| 8810 | dipeptidyl peptidase IV inhibitor (DPP IV inhibitor) | dipeptidyl peptidase IV inhibitor | 1 | KG | [106-107]                                 |
| 8825 | dipeptidyl peptidase IV inhibitor (DPP IV inhibitor) | dipeptidyl peptidase IV inhibitor | 1 | LV | [16-17]                                   |
| 8837 | dipeptidyl peptidase IV inhibitor (DPP IV inhibitor) | dipeptidyl peptidase IV inhibitor | 1 | MV | [95-96]                                   |
| 8839 | dipeptidyl peptidase IV inhibitor (DPP IV inhibitor) | dipeptidyl peptidase IV inhibitor | 1 | NA | [19-20]                                   |
| 8845 | dipeptidyl peptidase IV inhibitor (DPP IV inhibitor) | dipeptidyl peptidase IV inhibitor | 1 | NL | [91-92]                                   |
| 8848 | dipeptidyl peptidase IV inhibitor (DPP IV inhibitor) | dipeptidyl peptidase IV inhibitor | 1 | NQ | [67-68]                                   |
| 8862 | dipeptidyl peptidase IV inhibitor (DPP IV inhibitor) | dipeptidyl peptidase IV inhibitor | 1 | PS | [128-129]                                 |
| 8869 | dipeptidyl peptidase IV inhibitor (DPP IV inhibitor) | dipeptidyl peptidase IV inhibitor | 5 | QE | [58-59],[70-71],[78-79],[81-82],[102-103] |
| 8870 | dipeptidyl peptidase IV inhibitor (DPP IV inhibitor) | dipeptidyl peptidase IV inhibitor | 2 | QF | [42-43],[133-134]                         |
| 8871 | dipeptidyl peptidase IV inhibitor (DPP IV inhibitor) | dipeptidyl peptidase IV inhibitor | 1 | QG | [130-131]                                 |
| 8873 | dipeptidyl peptidase IV inhibitor (DPP IV inhibitor) | dipeptidyl peptidase IV inhibitor | 1 | QI | [104-105]                                 |
| 8874 | dipeptidyl peptidase IV inhibitor (DPP IV inhibitor) | dipeptidyl peptidase IV inhibitor | 1 | QL | [98-99]                                   |
| 8875 | dipeptidyl peptidase IV inhibitor (DPP IV inhibitor) | dipeptidyl peptidase IV inhibitor | 1 | QN | [90-91]                                   |
| 8876 | dipeptidyl peptidase IV inhibitor (DPP IV inhibitor) | dipeptidyl peptidase IV inhibitor | 3 | QQ | [46-47],[100-101],[101-102]               |
| 8877 | dipeptidyl peptidase IV inhibitor (DPP IV inhibitor) | dipeptidyl peptidase IV inhibitor | 2 | QS | [37-38],[135-136]                         |
| 8882 | dipeptidyl peptidase IV inhibitor (DPP IV inhibitor) | dipeptidyl peptidase IV inhibitor | 1 | RG | [62-63]                                   |
| 8884 | dipeptidyl peptidase IV inhibitor (DPP IV inhibitor) | dipeptidyl peptidase IV inhibitor | 1 | RI | [122-123]                                 |
| 8888 | dipeptidyl peptidase IV inhibitor (DPP IV inhibitor) | dipeptidyl peptidase IV inhibitor | 1 | RN | [50-51]                                   |
| 8889 | dipeptidyl peptidase IV inhibitor (DPP IV inhibitor) | dipeptidyl peptidase IV inhibitor | 1 | RR | [85-86]                                   |
| 8893 | dipeptidyl peptidase IV inhibitor (DPP IV inhibitor) | dipeptidyl peptidase IV inhibitor | 2 | SI | [21-22],[125-126]                         |
| 8897 | dipeptidyl peptidase IV inhibitor (DPP IV inhibitor) | dipeptidyl peptidase IV inhibitor | 1 | SY | [137-138]                                 |
| 8915 | dipeptidyl peptidase IV inhibitor (DPP IV inhibitor) | dipeptidyl peptidase IV inhibitor | 1 | VD | [83-84]                                   |
| 8916 | dipeptidyl peptidase IV inhibitor (DPP IV inhibitor) | dipeptidyl peptidase IV inhibitor | 2 | VE | [27-28],[29-30]                           |
| 8921 | dipeptidyl peptidase IV inhibitor (DPP IV inhibitor) | dipeptidyl peptidase IV inhibitor | 1 | VK | [56-57]                                   |

|      |                                                      |                                    |   |    |                   |
|------|------------------------------------------------------|------------------------------------|---|----|-------------------|
| 8922 | dipeptidyl peptidase IV inhibitor (DPP IV inhibitor) | dipeptidyl peptidase IV inhibitor  | 1 | VL | [13-14]           |
| 8925 | dipeptidyl peptidase IV inhibitor (DPP IV inhibitor) | dipeptidyl peptidase IV inhibitor  | 1 | VQ | [60-61]           |
| 8934 | dipeptidyl peptidase IV inhibitor (DPP IV inhibitor) | dipeptidyl peptidase IV inhibitor  | 1 | YE | [114-115]         |
| 8942 | dipeptidyl peptidase IV inhibitor (DPP IV inhibitor) | dipeptidyl peptidase IV inhibitor  | 1 | YN | [66-67]           |
| 8944 | dipeptidyl peptidase IV inhibitor (DPP IV inhibitor) | dipeptidyl peptidase IV inhibitor  | 1 | YR | [23-24]           |
| 8946 | dipeptidyl peptidase IV inhibitor (DPP IV inhibitor) | dipeptidyl peptidase IV inhibitor  | 1 | YV | [55-56]           |
| 9478 | DPP-III inhibitor                                    | dipeptidyl peptidase III inhibitor | 1 | LR | [73-74]           |
| 9484 | DPP-III inhibitor                                    | dipeptidyl peptidase III inhibitor | 1 | YR | [23-24]           |
| 9485 | DPP-III inhibitor                                    | dipeptidyl peptidase III inhibitor | 1 | RR | [85-86]           |
| 9487 | DPP-III inhibitor                                    | dipeptidyl peptidase III inhibitor | 1 | GE | [107-108]         |
| 9489 | DPP-III inhibitor                                    | dipeptidyl peptidase III inhibitor | 1 | PR | [121-122]         |
| 9490 | DPP-III inhibitor                                    | dipeptidyl peptidase III inhibitor | 1 | RF | [48-49]           |
| 9500 | DPP-III inhibitor                                    | dipeptidyl peptidase III inhibitor | 1 | FA | [11-12]           |
| 9501 | DPP-III inhibitor                                    | dipeptidyl peptidase III inhibitor | 1 | FR | [49-50]           |
| 9502 | DPP-III inhibitor                                    | dipeptidyl peptidase III inhibitor | 1 | FL | [4-5]             |
| 8249 | CaMPDE inhibitor                                     | CaMPDE inhibitor                   | 1 | KF | [3-4]             |
| 2842 | Renin inhibitor                                      | renin inhibitor                    | 1 | LR | [73-74]           |
| 8248 | Renin inhibitor                                      | renin inhibitor                    | 1 | KF | [3-4]             |
| 9431 | Renin inhibitor                                      | renin inhibitor                    | 2 | QF | [42-43],[133-134] |
| 9470 | Renin inhibitor                                      | renin inhibitor                    | 1 | LY | [113-114]         |

Table S10. Profile of potential biological activity of fragments of protein Car i 1.0101.

| ID   | Name of peptide                             | Activity      | Number | Sequence | Location                  |
|------|---------------------------------------------|---------------|--------|----------|---------------------------|
| 3258 | beta-lactokinin                             | ACE inhibitor | 2      | IR       | [110-111],[138-139]       |
| 3515 | ACE inhibitor                               | ACE inhibitor | 1      | GGY      | [67-69]                   |
| 3518 | ACE inhibitor                               | ACE inhibitor | 1      | VAA      | [4-6]                     |
| 3532 | ACE inhibitor                               | ACE inhibitor | 1      | GY       | [68-69]                   |
| 3537 | ACE inhibitor                               | ACE inhibitor | 1      | PR       | [36-37]                   |
| 3551 | ACE inhibitor (from bovine beta-Lg)         | ACE inhibitor | 1      | LF       | [12-13]                   |
| 7542 | ACE inhibitor                               | ACE inhibitor | 1      | DLP      | [124-126]                 |
| 7583 | ACE inhibitor                               | ACE inhibitor | 1      | AF       | [19-20]                   |
| 7590 | ACE inhibitor                               | ACE inhibitor | 3      | AA       | [5-6],[17-18],[18-19]     |
| 7592 | ACE inhibitor                               | ACE inhibitor | 2      | FR       | [20-21],[78-79]           |
| 7596 | ACE inhibitor                               | ACE inhibitor | 2      | GI       | [109-110],[130-131]       |
| 7599 | ACE inhibitor                               | ACE inhibitor | 1      | GL       | [96-97]                   |
| 7615 | ACE inhibitor                               | ACE inhibitor | 2      | GE       | [40-41],[112-113]         |
| 7616 | ACE inhibitor                               | ACE inhibitor | 1      | GG       | [67-68]                   |
| 7618 | ACE inhibitor                               | ACE inhibitor | 1      | SG       | [66-67]                   |
| 7622 | ACE inhibitor                               | ACE inhibitor | 2      | EG       | [95-96],[108-109]         |
| 7628 | ACE inhibitor from k-CN (fr. 67-68)         | ACE inhibitor | 1      | VR       | [101-102]                 |
| 7644 | ACE inhibitor from porcine myosin (306-308) | ACE inhibitor | 1      | ITT      | [24-26]                   |
| 7741 | ACE inhibitor                               | ACE inhibitor | 3      | RR       | [37-38],[38-39],[139-140] |
| 7742 | ACE inhibitor                               | ACE inhibitor | 1      | AR       | [2-3]                     |
| 7807 | ACE inhibitor from caprine b-Lg             | ACE inhibitor | 1      | LLF      | [11-13]                   |
| 7826 | ACE inhibitor                               | ACE inhibitor | 2      | EI       | [28-29],[137-138]         |
| 7832 | ACE inhibitor                               | ACE inhibitor | 1      | LN       | [53-54]                   |
| 7839 | ACE inhibitor                               | ACE inhibitor | 3      | ME       | [27-28],[88-89],[115-116] |
| 7841 | ACE inhibitor                               | ACE inhibitor | 1      | KE       | [127-128]                 |
| 8951 | ACE inhibitor                               | ACE inhibitor | 1      | AV       | [100-101]                 |
| 9072 | ACE inhibitor                               | ACE inhibitor | 1      | DY       | [58-59]                   |
| 9173 | ACE inhibitor                               | ACE inhibitor | 2      | RG       | [39-40],[111-112]         |
| 9213 | ACE inhibitor                               | ACE inhibitor | 2      | LR       | [60-61],[97-98]           |

|      |                                                      |                                   |   |     |                                       |
|------|------------------------------------------------------|-----------------------------------|---|-----|---------------------------------------|
| 9309 | ACE inhibitor                                        | ACE inhibitor                     | 1 | RRR | [37-39]                               |
| 9730 | ACE inhibitor                                        | ACE inhibitor                     | 1 | NPR | [35-37]                               |
| 8321 | Glucose uptake stimulating peptide                   | stimulating                       | 1 | LV  | [8-9]                                 |
| 8326 | Glucose uptake stimulating peptide                   | stimulating                       | 2 | LL  | [7-8],[11-12]                         |
| 8329 | Stimulating vasoactive substance release             | stimulating                       | 4 | EE  | [89-90],[107-108],[113-114],[116-117] |
| 8310 | Anxiolytic peptide                                   | neuropeptide                      | 2 | YL  | [52-53],[59-60]                       |
| 2749 | peptide regulating ion flow                          | regulating                        | 1 | DY  | [58-59]                               |
| 8215 | Antioxidative peptide                                | antioxidative                     | 2 | IR  | [110-111],[138-139]                   |
| 9357 | Antioxidative peptide                                | antioxidative                     | 1 | CQC | [92-94]                               |
| 9368 | Antioxidative peptide                                | antioxidative                     | 1 | EQC | [90-92]                               |
| 3172 | dipeptidyl peptidase IV inhibitor (DPP IV inhibitor) | dipeptidyl peptidase IV inhibitor | 3 | VA  | [4-5],[9-10],[14-15]                  |
| 3173 | dipeptidyl peptidase IV inhibitor (DPP IV inhibitor) | dipeptidyl peptidase IV inhibitor | 1 | MA  | [1-2]                                 |
| 3180 | dipeptidyl peptidase IV inhibitor (DPP IV inhibitor) | dipeptidyl peptidase IV inhibitor | 1 | LP  | [125-126]                             |
| 3182 | dipeptidyl peptidase IV inhibitor (DPP IV inhibitor) | dipeptidyl peptidase IV inhibitor | 2 | LL  | [7-8],[11-12]                         |
| 8530 | dipeptidyl peptidase IV inhibitor (DPP IV inhibitor) | dipeptidyl peptidase IV inhibitor | 1 | NP  | [35-36]                               |
| 8559 | dipeptidyl peptidase IV inhibitor (DPP IV inhibitor) | dipeptidyl peptidase IV inhibitor | 2 | AL  | [6-7],[10-11]                         |
| 8561 | dipeptidyl peptidase IV inhibitor (DPP IV inhibitor) | dipeptidyl peptidase IV inhibitor | 1 | GL  | [96-97]                               |
| 8594 | dipeptidyl peptidase IV inhibitor (DPP IV inhibitor) | dipeptidyl peptidase IV inhibitor | 1 | VR  | [101-102]                             |
| 8637 | dipeptidyl peptidase IV inhibitor (DPP IV inhibitor) | dipeptidyl peptidase IV inhibitor | 3 | AA  | [5-6],[17-18],[18-19]                 |
| 8692 | dipeptidyl peptidase IV inhibitor (DPP IV inhibitor) | dipeptidyl peptidase IV inhibitor | 1 | WF  | [142-143]                             |
| 8759 | dipeptidyl peptidase IV inhibitor (DPP IV inhibitor) | dipeptidyl peptidase IV inhibitor | 1 | AF  | [19-20]                               |
| 8762 | dipeptidyl peptidase IV inhibitor (DPP IV inhibitor) | dipeptidyl peptidase IV inhibitor | 1 | AS  | [122-123]                             |
| 8764 | dipeptidyl peptidase IV inhibitor (DPP IV inhibitor) | dipeptidyl peptidase IV inhibitor | 1 | AV  | [100-101]                             |
| 8766 | dipeptidyl peptidase IV inhibitor (DPP IV inhibitor) | dipeptidyl peptidase IV inhibitor | 2 | DN  | [34-35],[72-73]                       |
| 8770 | dipeptidyl peptidase IV inhibitor (DPP IV inhibitor) | dipeptidyl peptidase IV inhibitor | 2 | EG  | [95-96],[108-109]                     |
| 8772 | dipeptidyl peptidase IV inhibitor (DPP IV inhibitor) | dipeptidyl peptidase IV inhibitor | 2 | EI  | [28-29],[137-138]                     |
| 8773 | dipeptidyl peptidase IV inhibitor (DPP IV inhibitor) | dipeptidyl peptidase IV inhibitor | 1 | ES  | [41-42]                               |
| 8780 | dipeptidyl peptidase IV inhibitor (DPP IV inhibitor) | dipeptidyl peptidase IV inhibitor | 2 | FR  | [20-21],[78-79]                       |
| 8781 | dipeptidyl peptidase IV inhibitor (DPP IV inhibitor) | dipeptidyl peptidase IV inhibitor | 2 | GE  | [40-41],[112-113]                     |
| 8783 | dipeptidyl peptidase IV inhibitor (DPP IV inhibitor) | dipeptidyl peptidase IV inhibitor | 1 | GG  | [67-68]                               |
| 8785 | dipeptidyl peptidase IV inhibitor (DPP IV inhibitor) | dipeptidyl peptidase IV inhibitor | 2 | GI  | [109-110],[130-131]                   |
| 8788 | dipeptidyl peptidase IV inhibitor (DPP IV inhibitor) | dipeptidyl peptidase IV inhibitor | 1 | GY  | [68-69]                               |

|      |                                                      |                                    |   |    |                                                       |
|------|------------------------------------------------------|------------------------------------|---|----|-------------------------------------------------------|
| 8791 | dipeptidyl peptidase IV inhibitor (DPP IV inhibitor) | dipeptidyl peptidase IV inhibitor  | 1 | HF | [77-78]                                               |
| 8805 | dipeptidyl peptidase IV inhibitor (DPP IV inhibitor) | dipeptidyl peptidase IV inhibitor  | 1 | IQ | [47-48]                                               |
| 8806 | dipeptidyl peptidase IV inhibitor (DPP IV inhibitor) | dipeptidyl peptidase IV inhibitor  | 2 | IR | [110-111],[138-139]                                   |
| 8808 | dipeptidyl peptidase IV inhibitor (DPP IV inhibitor) | dipeptidyl peptidase IV inhibitor  | 1 | KE | [127-128]                                             |
| 8823 | dipeptidyl peptidase IV inhibitor (DPP IV inhibitor) | dipeptidyl peptidase IV inhibitor  | 1 | LN | [53-54]                                               |
| 8825 | dipeptidyl peptidase IV inhibitor (DPP IV inhibitor) | dipeptidyl peptidase IV inhibitor  | 1 | LV | [8-9]                                                 |
| 8826 | dipeptidyl peptidase IV inhibitor (DPP IV inhibitor) | dipeptidyl peptidase IV inhibitor  | 3 | ME | [27-28],[88-89],[115-116]                             |
| 8837 | dipeptidyl peptidase IV inhibitor (DPP IV inhibitor) | dipeptidyl peptidase IV inhibitor  | 1 | MV | [118-119]                                             |
| 8839 | dipeptidyl peptidase IV inhibitor (DPP IV inhibitor) | dipeptidyl peptidase IV inhibitor  | 1 | NA | [16-17]                                               |
| 8848 | dipeptidyl peptidase IV inhibitor (DPP IV inhibitor) | dipeptidyl peptidase IV inhibitor  | 1 | NQ | [73-74]                                               |
| 8849 | dipeptidyl peptidase IV inhibitor (DPP IV inhibitor) | dipeptidyl peptidase IV inhibitor  | 1 | NR | [54-55]                                               |
| 8858 | dipeptidyl peptidase IV inhibitor (DPP IV inhibitor) | dipeptidyl peptidase IV inhibitor  | 1 | PK | [126-127]                                             |
| 8867 | dipeptidyl peptidase IV inhibitor (DPP IV inhibitor) | dipeptidyl peptidase IV inhibitor  | 1 | QA | [99-100]                                              |
| 8868 | dipeptidyl peptidase IV inhibitor (DPP IV inhibitor) | dipeptidyl peptidase IV inhibitor  | 1 | QD | [57-58]                                               |
| 8869 | dipeptidyl peptidase IV inhibitor (DPP IV inhibitor) | dipeptidyl peptidase IV inhibitor  | 1 | QE | [106-107]                                             |
| 8872 | dipeptidyl peptidase IV inhibitor (DPP IV inhibitor) | dipeptidyl peptidase IV inhibitor  | 1 | QH | [76-77]                                               |
| 8873 | dipeptidyl peptidase IV inhibitor (DPP IV inhibitor) | dipeptidyl peptidase IV inhibitor  | 1 | QI | [46-47]                                               |
| 8874 | dipeptidyl peptidase IV inhibitor (DPP IV inhibitor) | dipeptidyl peptidase IV inhibitor  | 1 | QL | [84-85]                                               |
| 8876 | dipeptidyl peptidase IV inhibitor (DPP IV inhibitor) | dipeptidyl peptidase IV inhibitor  | 6 | QQ | [50-51],[62-63],[83-84],[103-104],[104-105],[105-106] |
| 8881 | dipeptidyl peptidase IV inhibitor (DPP IV inhibitor) | dipeptidyl peptidase IV inhibitor  | 1 | QY | [51-52]                                               |
| 8882 | dipeptidyl peptidase IV inhibitor (DPP IV inhibitor) | dipeptidyl peptidase IV inhibitor  | 2 | RG | [39-40],[111-112]                                     |
| 8889 | dipeptidyl peptidase IV inhibitor (DPP IV inhibitor) | dipeptidyl peptidase IV inhibitor  | 3 | RR | [37-38],[38-39],[139-140]                             |
| 8896 | dipeptidyl peptidase IV inhibitor (DPP IV inhibitor) | dipeptidyl peptidase IV inhibitor  | 1 | SW | [141-142]                                             |
| 8903 | dipeptidyl peptidase IV inhibitor (DPP IV inhibitor) | dipeptidyl peptidase IV inhibitor  | 1 | TI | [23-24]                                               |
| 8906 | dipeptidyl peptidase IV inhibitor (DPP IV inhibitor) | dipeptidyl peptidase IV inhibitor  | 1 | TM | [26-27]                                               |
| 8911 | dipeptidyl peptidase IV inhibitor (DPP IV inhibitor) | dipeptidyl peptidase IV inhibitor  | 2 | TT | [22-23],[25-26]                                       |
| 8925 | dipeptidyl peptidase IV inhibitor (DPP IV inhibitor) | dipeptidyl peptidase IV inhibitor  | 1 | VQ | [119-120]                                             |
| 8933 | dipeptidyl peptidase IV inhibitor (DPP IV inhibitor) | dipeptidyl peptidase IV inhibitor  | 1 | YD | [69-70]                                               |
| 8940 | dipeptidyl peptidase IV inhibitor (DPP IV inhibitor) | dipeptidyl peptidase IV inhibitor  | 2 | YL | [52-53],[59-60]                                       |
| 9478 | DPP-III inhibitor                                    | dipeptidyl peptidase III inhibitor | 2 | LR | [60-61],[97-98]                                       |
| 9482 | DPP-III inhibitor                                    | dipeptidyl peptidase III inhibitor | 2 | YL | [52-53],[59-60]                                       |
| 9485 | DPP-III inhibitor                                    | dipeptidyl peptidase III inhibitor | 3 | RR | [37-38],[38-39],[139-140]                             |

|      |                   |                                    |   |    |                     |
|------|-------------------|------------------------------------|---|----|---------------------|
| 9487 | DPP-III inhibitor | dipeptidyl peptidase III inhibitor | 2 | GE | [40-41],[112-113]   |
| 9489 | DPP-III inhibitor | dipeptidyl peptidase III inhibitor | 1 | PR | [36-37]             |
| 9491 | DPP-III inhibitor | dipeptidyl peptidase III inhibitor | 1 | RV | [3-4]               |
| 9495 | DPP-III inhibitor | dipeptidyl peptidase III inhibitor | 1 | HF | [77-78]             |
| 9501 | DPP-III inhibitor | dipeptidyl peptidase III inhibitor | 2 | FR | [20-21],[78-79]     |
| 8247 | CaMPDE inhibitor  | CaMPDE inhibitor                   | 2 | IR | [110-111],[138-139] |
| 2842 | Renin inhibitor   | renin inhibitor                    | 2 | LR | [60-61],[97-98]     |
| 8246 | renin inhibitor   | renin inhibitor                    | 2 | IR | [110-111],[138-139] |
| 9430 | Renin inhibitor   | renin inhibitor                    | 1 | NR | [54-55]             |

Table S11. Profile of potential biological activity of fragments of protein Car i 2.0101.

| ID   | Name of peptide                         | Activity      | Number | Sequence | Location                                                                                                  |
|------|-----------------------------------------|---------------|--------|----------|-----------------------------------------------------------------------------------------------------------|
| 3460 | Prolyl endopeptidase inhibitor          | antiamnestic  | 1      | PG       | [499-500]                                                                                                 |
| 3461 | Prolyl endopeptidase inhibitor          | antiamnestic  | 2      | GP       | [356-357],[580-581]                                                                                       |
| 2653 | ACE inhibitor                           | ACE inhibitor | 1      | VLP      | [429-431]                                                                                                 |
| 3257 | beta-lactokinin                         | ACE inhibitor | 5      | RL       | [241-242],[486-487],[535-536],[685-686],[711-712]                                                         |
| 3258 | beta-lactokinin                         | ACE inhibitor | 2      | IR       | [468-469],[551-552]                                                                                       |
| 3380 | ACE inhibitor                           | ACE inhibitor | 1      | RY       | [271-272]                                                                                                 |
| 3384 | ACE inhibitor                           | ACE inhibitor | 1      | VF       | [519-520]                                                                                                 |
| 3489 | ACE inhibitor from sake lees            | ACE inhibitor | 4      | RF       | [182-183],[402-403],[538-539],[647-648]                                                                   |
| 3492 | ACE inhibitor from sake                 | ACE inhibitor | 1      | VY       | [639-640]                                                                                                 |
| 3494 | ACE inhibitor from sake                 | ACE inhibitor | 1      | HY       | [630-631]                                                                                                 |
| 3507 | ACE inhibitor (beta-LG fr. 78-80)       | ACE inhibitor | 1      | IPA      | [694-696]                                                                                                 |
| 3518 | ACE inhibitor                           | ACE inhibitor | 1      | VAA      | [526-528]                                                                                                 |
| 3537 | ACE inhibitor                           | ACE inhibitor | 11     | PR       | [92-93],[95-96],[111-112],[148-149],[151-152],[207-208],[210-211],[265-266],[362-363],[532-533],[749-750] |
| 3542 | ACE inhibitor                           | ACE inhibitor | 1      | LQP      | [493-495]                                                                                                 |
| 3544 | ACE inhibitor                           | ACE inhibitor | 1      | LNP      | [36-38]                                                                                                   |
| 3547 | ACE inhibitor                           | ACE inhibitor | 1      | IRA      | [551-553]                                                                                                 |
| 3551 | ACE inhibitor (from bovine beta-Lg)     | ACE inhibitor | 3      | LF       | [9-10],[11-12],[16-17]                                                                                    |
| 3553 | ACE inhibitor                           | ACE inhibitor | 1      | YG       | [464-465]                                                                                                 |
| 7512 | ACE inhibitor from Alaskan pollack skin | ACE inhibitor | 2      | GP       | [356-357],[580-581]                                                                                       |
| 7513 | ACE inhibitor from Alaskan pollack skin | ACE inhibitor | 2      | PL       | [8-9],[781-782]                                                                                           |
| 7558 | ACE inhibitor from buckwheat            | ACE inhibitor | 2      | VK       | [397-398],[490-491]                                                                                       |
| 7562 | ACE inhibitor from soy hydrolysate      | ACE inhibitor | 1      | IA       | [700-701]                                                                                                 |
| 7580 | ACE inhibitor                           | ACE inhibitor | 1      | RW       | [46-47]                                                                                                   |
| 7581 | ACE inhibitor                           | ACE inhibitor | 2      | IP       | [7-8],[694-695]                                                                                           |
| 7582 | ACE inhibitor                           | ACE inhibitor | 1      | RP       | [571-572]                                                                                                 |
| 7585 | ACE inhibitor                           | ACE inhibitor | 5      | LA       | [18-19],[25-26],[686-687],[727-728],[782-783]                                                             |
| 7586 | ACE inhibitor                           | ACE inhibitor | 1      | KR       | [622-623]                                                                                                 |
| 7587 | ACE inhibitor                           | ACE inhibitor | 3      | VP       | [470-471],[628-629],[766-767]                                                                             |
| 7588 | ACE inhibitor                           | ACE inhibitor | 3      | RA       | [446-447],[552-553],[559-560]                                                                             |



|      |                                 |               |    |     |                                                                                                                       |
|------|---------------------------------|---------------|----|-----|-----------------------------------------------------------------------------------------------------------------------|
| 7589 | ACE inhibitor                   | ACE inhibitor | 2  | YA  | [506-507],[618-619]                                                                                                   |
| 7590 | ACE inhibitor                   | ACE inhibitor | 2  | AA  | [507-508],[527-528]                                                                                                   |
| 7591 | ACE inhibitor                   | ACE inhibitor | 2  | GF  | [714-715],[790-791]                                                                                                   |
| 7592 | ACE inhibitor                   | ACE inhibitor | 1  | FR  | [502-503]                                                                                                             |
| 7593 | ACE inhibitor                   | ACE inhibitor | 2  | IF  | [691-692],[756-757]                                                                                                   |
| 7594 | ACE inhibitor                   | ACE inhibitor | 1  | VG  | [713-714]                                                                                                             |
| 7596 | ACE inhibitor                   | ACE inhibitor | 2  | GI  | [412-413],[716-717]                                                                                                   |
| 7598 | ACE inhibitor                   | ACE inhibitor | 3  | GA  | [473-474],[509-510],[624-625]                                                                                         |
| 7599 | ACE inhibitor                   | ACE inhibitor | 1  | GL  | [385-386]                                                                                                             |
| 7600 | ACE inhibitor                   | ACE inhibitor | 6  | AG  | [472-473],[508-509],[568-569],[696-697],[728-729],[789-790]                                                           |
| 7601 | ACE inhibitor                   | ACE inhibitor | 1  | GH  | [697-698]                                                                                                             |
| 7603 | ACE inhibitor                   | ACE inhibitor | 11 | GR  | [139-140],[198-199],[257-258],[309-310],[352-353],[368-369],[445-446],[574-575],[646-647],[665-666],[777-778]         |
| 7604 | ACE inhibitor                   | ACE inhibitor | 1  | KG  | [664-665]                                                                                                             |
| 7605 | ACE inhibitor                   | ACE inhibitor | 2  | FG  | [595-596],[715-716]                                                                                                   |
| 7606 | ACE inhibitor                   | ACE inhibitor | 1  | DA  | [435-436]                                                                                                             |
| 7608 | ACE inhibitor                   | ACE inhibitor | 1  | GV  | [548-549]                                                                                                             |
| 7610 | ACE inhibitor                   | ACE inhibitor | 12 | GQ  | [62-63],[166-167],[168-169],[225-226],[227-228],[285-286],[500-501],[569-570],[596-597],[677-678],[729-730],[775-776] |
| 7611 | ACE inhibitor                   | ACE inhibitor | 1  | GK  | [719-720]                                                                                                             |
| 7612 | ACE inhibitor                   | ACE inhibitor | 1  | GT  | [644-645]                                                                                                             |
| 7613 | ACE inhibitor                   | ACE inhibitor | 2  | WG  | [355-356],[573-574]                                                                                                   |
| 7615 | ACE inhibitor                   | ACE inhibitor | 2  | GE  | [393-394],[395-396]                                                                                                   |
| 7616 | ACE inhibitor                   | ACE inhibitor | 1  | GG  | [579-580]                                                                                                             |
| 7617 | ACE inhibitor                   | ACE inhibitor | 7  | QG  | [165-166],[167-168],[224-225],[226-227],[351-352],[384-385],[776-777]                                                 |
| 7618 | ACE inhibitor                   | ACE inhibitor | 2  | SG  | [392-393],[578-579]                                                                                                   |
| 7620 | ACE inhibitor                   | ACE inhibitor | 2  | GD  | [465-466],[689-690]                                                                                                   |
| 7621 | ACE inhibitor                   | ACE inhibitor | 2  | TG  | [645-646],[676-677]                                                                                                   |
| 7622 | ACE inhibitor                   | ACE inhibitor | 3  | EG  | [394-395],[547-548],[643-644]                                                                                         |
| 7623 | ACE inhibitor                   | ACE inhibitor | 3  | EA  | [422-423],[600-601],[740-741]                                                                                         |
| 7624 | ACE inhibitor                   | ACE inhibitor | 1  | NG  | [718-719]                                                                                                             |
| 7625 | ACE inhibitor                   | ACE inhibitor | 1  | PG  | [499-500]                                                                                                             |
| 7638 | ACE inhibitor from tuna muscles | ACE inhibitor | 1  | LTF | [449-451]                                                                                                             |

|      |                                           |               |    |     |                                                                                                                                                                                                                 |
|------|-------------------------------------------|---------------|----|-----|-----------------------------------------------------------------------------------------------------------------------------------------------------------------------------------------------------------------|
| 7680 | ACE inhibitor from pea vicilin            | ACE inhibitor | 1  | QK  | [680-681]                                                                                                                                                                                                       |
| 7682 | ACE inhibitor from garlic                 | ACE inhibitor | 2  | NY  | [415-416],[617-618]                                                                                                                                                                                             |
| 7683 | ACE inhibitor from garlic                 | ACE inhibitor | 1  | NF  | [725-726]                                                                                                                                                                                                       |
| 7684 | ACE inhibitor from garlic                 | ACE inhibitor | 4  | SY  | [515-516],[590-591],[660-661],[763-764]                                                                                                                                                                         |
| 7685 | ACE inhibitor from garlic                 | ACE inhibitor | 2  | SF  | [459-460],[745-746]                                                                                                                                                                                             |
| 7691 | ACE inhibitor from wakame                 | ACE inhibitor | 1  | KY  | [398-399]                                                                                                                                                                                                       |
| 7693 | ACE inhibitor from wakame                 | ACE inhibitor | 2  | KL  | [491-492],[557-558]                                                                                                                                                                                             |
| 7697 | ACE inhibitor from wakame                 | ACE inhibitor | 2  | YK  | [347-348],[663-664]                                                                                                                                                                                             |
| 7741 | ACE inhibitor                             | ACE inhibitor | 21 | RR  | [71-72],[119-120],[133-134],[136-137],[137-138],[163-164],[188-189],[195-196],[196-197],[222-223],[254-255],[255-256],[283-284],[292-293],[293-294],[324-325],[363-364],[456-457],[575-576],[666-667],[773-774] |
| 7742 | ACE inhibitor                             | ACE inhibitor | 2  | AR  | [684-685],[687-688]                                                                                                                                                                                             |
| 7743 | ACE inhibitor                             | ACE inhibitor | 2  | KA  | [4-5],[634-635]                                                                                                                                                                                                 |
| 7752 | ACE inhibitor from shark meat hydrolysate | ACE inhibitor | 4  | EY  | [463-464],[476-477],[504-505],[662-663]                                                                                                                                                                         |
| 7826 | ACE inhibitor                             | ACE inhibitor | 4  | EI  | [88-89],[620-621],[752-753],[755-756]                                                                                                                                                                           |
| 7827 | ACE inhibitor                             | ACE inhibitor | 2  | IE  | [413-414],[753-754]                                                                                                                                                                                             |
| 7828 | ACE inhibitor                             | ACE inhibitor | 1  | EV  | [396-397]                                                                                                                                                                                                       |
| 7829 | ACE inhibitor                             | ACE inhibitor | 2  | VE  | [642-643],[761-762]                                                                                                                                                                                             |
| 7830 | ACE inhibitor                             | ACE inhibitor | 5  | TE  | [29-30],[404-405],[407-408],[475-476],[513-514]                                                                                                                                                                 |
| 7831 | ACE inhibitor                             | ACE inhibitor | 2  | LQ  | [493-494],[609-610]                                                                                                                                                                                             |
| 7832 | ACE inhibitor                             | ACE inhibitor | 2  | LN  | [36-37],[529-530]                                                                                                                                                                                               |
| 7834 | ACE inhibitor                             | ACE inhibitor | 1  | TQ  | [328-329]                                                                                                                                                                                                       |
| 7837 | ACE inhibitor                             | ACE inhibitor | 2  | PQ  | [115-116],[315-316]                                                                                                                                                                                             |
| 7838 | ACE inhibitor                             | ACE inhibitor | 1  | EW  | [354-355]                                                                                                                                                                                                       |
| 7839 | ACE inhibitor                             | ACE inhibitor | 1  | ME  | [768-769]                                                                                                                                                                                                       |
| 7840 | ACE inhibitor                             | ACE inhibitor | 2  | EK  | [107-108],[556-557]                                                                                                                                                                                             |
| 7841 | ACE inhibitor                             | ACE inhibitor | 3  | KE  | [145-146],[348-349],[742-743]                                                                                                                                                                                   |
| 7842 | ACE inhibitor                             | ACE inhibitor | 2  | HP  | [698-699],[780-781]                                                                                                                                                                                             |
| 7843 | ACE inhibitor                             | ACE inhibitor | 3  | PH  | [38-39],[629-630],[653-654]                                                                                                                                                                                     |
| 7844 | ACE inhibitor                             | ACE inhibitor | 1  | HK  | [433-434]                                                                                                                                                                                                       |
| 8185 | ACE inhibitor                             | ACE inhibitor | 2  | TF  | [427-428],[450-451]                                                                                                                                                                                             |
| 8193 | ACE inhibitor                             | ACE inhibitor | 1  | AI  | [701-702]                                                                                                                                                                                                       |
| 8513 | ACE inhibitor from soya milk              | ACE inhibitor | 1  | FVP | [765-767]                                                                                                                                                                                                       |

|      |                                          |                  |    |     |                                                                                                                       |
|------|------------------------------------------|------------------|----|-----|-----------------------------------------------------------------------------------------------------------------------|
| 9031 | ACE inhibitor                            | ACE inhibitor    | 1  | LEE | [242-244]                                                                                                             |
| 9068 | ACE inhibitor                            | ACE inhibitor    | 1  | VTR | [442-444]                                                                                                             |
| 9073 | ACE inhibitor                            | ACE inhibitor    | 1  | TP  | [531-532]                                                                                                             |
| 9074 | ACE inhibitor                            | ACE inhibitor    | 1  | DF  | [787-788]                                                                                                             |
| 9076 | ACE inhibitor                            | ACE inhibitor    | 3  | FQ  | [49-50],[125-126],[679-680]                                                                                           |
| 9077 | ACE inhibitor                            | ACE inhibitor    | 2  | YV  | [477-478],[640-641]                                                                                                   |
| 9078 | ACE inhibitor                            | ACE inhibitor    | 3  | YE  | [99-100],[272-273],[661-662]                                                                                          |
| 9079 | ACE inhibitor                            | ACE inhibitor    | 3  | IL  | [420-421],[524-525],[785-786]                                                                                         |
| 9085 | ACE inhibitor                            | ACE inhibitor    | 1  | MM  | [626-627]                                                                                                             |
| 9087 | ACE inhibitor                            | ACE inhibitor    | 2  | YH  | [319-320],[432-433]                                                                                                   |
| 9173 | ACE inhibitor                            | ACE inhibitor    | 12 | RG  | [61-62],[138-139],[197-198],[256-257],[284-285],[308-309],[367-368],[411-412],[444-445],[623-624],[688-689],[774-775] |
| 9183 | ACE inhibitor                            | ACE inhibitor    | 1  | GTG | [644-646]                                                                                                             |
| 9184 | ACE inhibitor                            | ACE inhibitor    | 2  | ST  | [512-513],[675-676]                                                                                                   |
| 9185 | ACE inhibitor                            | ACE inhibitor    | 1  | YN  | [631-632]                                                                                                             |
| 9213 | ACE inhibitor                            | ACE inhibitor    | 6  | LR  | [77-78],[386-387],[410-411],[517-518],[558-559],[710-711]                                                             |
| 9309 | ACE inhibitor                            | ACE inhibitor    | 4  | RRR | [136-138],[195-197],[254-256],[292-294]                                                                               |
| 9566 | ACE inhibitor                            | ACE inhibitor    | 2  | QP  | [114-115],[494-495]                                                                                                   |
| 9730 | ACE inhibitor                            | ACE inhibitor    | 3  | NPR | [147-149],[206-208],[264-266]                                                                                         |
| 9743 | ACE inhibitor                            | ACE inhibitor    | 4  | EQR | [186-188],[245-247],[269-271],[544-546]                                                                               |
| 9754 | ACE inhibitor                            | ACE inhibitor    | 1  | NLR | [709-711]                                                                                                             |
| 3283 | Antithrombotic peptide                   | antithrombotic   | 2  | GP  | [356-357],[580-581]                                                                                                   |
| 3285 | Antithrombotic peptide                   | antithrombotic   | 1  | PG  | [499-500]                                                                                                             |
| 3354 | Antithrombotic peptide                   | antithrombotic   | 1  | DEE | [203-205]                                                                                                             |
| 9660 | Antithrombotic peptide                   | antithrombotic   | 1  | RGD | [688-690]                                                                                                             |
| 2882 | Immunostimulating peptide                | immunomodulating | 1  | YG  | [464-465]                                                                                                             |
| 3351 | Stimulating vasoactive substance release | stimulating      | 5  | EEE | [184-186],[243-245],[370-372],[670-672],[671-673]                                                                     |
| 8320 | Glucose uptake stimulating peptide       | stimulating      | 2  | VL  | [429-430],[614-615]                                                                                                   |
| 8321 | Glucose uptake stimulating peptide       | stimulating      | 4  | LV  | [20-21],[525-526],[615-616],[712-713]                                                                                 |
| 8322 | Glucose uptake stimulating peptide       | stimulating      | 2  | IV  | [89-90],[440-441]                                                                                                     |
| 8323 | Glucose uptake stimulating peptide       | stimulating      | 3  | IL  | [420-421],[524-525],[785-786]                                                                                         |
| 8325 | Glucose uptake stimulating peptide       | stimulating      | 2  | II  | [550-551],[733-734]                                                                                                   |

|      |                                                          |               |    |     |                                                                                                                                                                                                                       |
|------|----------------------------------------------------------|---------------|----|-----|-----------------------------------------------------------------------------------------------------------------------------------------------------------------------------------------------------------------------|
| 8326 | Glucose uptake stimulating peptide                       | stimulating   | 2  | LL  | [409-410],[492-493]                                                                                                                                                                                                   |
| 8329 | Stimulating vasoactive substance release                 | stimulating   | 22 | EE  | [59-60],[74-75],[87-88],[159-160],[180-181],[184-185],[185-186],[191-192],[204-205],[239-240],[243-244],[244-245],[250-251],[302-303],[370-371],[371-372],[604-605],[670-671],[671-672],[672-673],[751-752],[754-755] |
| 2890 | neuropeptide                                             | neuropeptide  | 12 | GQ  | [62-63],[166-167],[168-169],[225-226],[227-228],[285-286],[500-501],[569-570],[596-597],[677-678],[729-730],[775-776]                                                                                                 |
| 8310 | Anxiolytic peptide                                       | neuropeptide  | 2  | YL  | [399-400],[516-517]                                                                                                                                                                                                   |
| 9534 | Kyotorphin                                               | neuropeptide  | 3  | YR  | [155-156],[214-215],[416-417]                                                                                                                                                                                         |
| 2753 | peptide regulating the stomach mucosal membrane activity | regulating    | 2  | GP  | [356-357],[580-581]                                                                                                                                                                                                   |
| 2754 | peptide regulating the stomach mucosal membrane activity | regulating    | 1  | PG  | [499-500]                                                                                                                                                                                                             |
| 8318 | Dvl protein binding                                      | anticancer    | 1  | VVV | [637-639]                                                                                                                                                                                                             |
| 3300 |                                                          | antioxidative | 1  | PHH | [38-40]                                                                                                                                                                                                               |
| 3307 |                                                          | antioxidative | 1  | PYY | [378-380]                                                                                                                                                                                                             |
| 3319 |                                                          | antioxidative | 1  | HH  | [39-40]                                                                                                                                                                                                               |
| 7888 | antioxidative peptide                                    | antioxidative | 3  | EL  | [35-36],[408-409],[743-744]                                                                                                                                                                                           |
| 7927 | synthetic peptide                                        | antioxidative | 1  | EYY | [504-506]                                                                                                                                                                                                             |
| 7928 | synthetic peptide                                        | antioxidative | 1  | YFY | [661-663]                                                                                                                                                                                                             |
| 7939 | synthetic peptide                                        | antioxidative | 1  | YYA | [505-507]                                                                                                                                                                                                             |
| 7943 | synthetic peptide                                        | antioxidative | 1  | YYF | [379-381]                                                                                                                                                                                                             |
| 8023 | synthetic peptide                                        | antioxidative | 1  | PHD | [653-655]                                                                                                                                                                                                             |
| 8038 | synthetic peptide                                        | antioxidative | 1  | PHY | [629-631]                                                                                                                                                                                                             |
| 8042 | synthetic peptide                                        | antioxidative | 1  | PWG | [572-574]                                                                                                                                                                                                             |
| 8056 | synthetic peptide                                        | antioxidative | 1  | RHE | [389-391]                                                                                                                                                                                                             |
| 8063 | synthetic peptide                                        | antioxidative | 1  | RHN | [375-377]                                                                                                                                                                                                             |
| 8072 | synthetic peptide                                        | antioxidative | 1  | RWE | [46-48]                                                                                                                                                                                                               |
| 8103 | peptide derived from dried bonito                        | antioxidative | 1  | VKL | [490-492]                                                                                                                                                                                                             |
| 8130 | peptide derived from dried bonito                        | antioxidative | 1  | EAK | [740-742]                                                                                                                                                                                                             |
| 8134 | peptide derived from dried bonito                        | antioxidative | 1  | KD  | [434-435]                                                                                                                                                                                                             |
| 8190 | peptide from buckwheat                                   | antioxidative | 1  | PW  | [572-573]                                                                                                                                                                                                             |
| 8214 | Antioxidative peptide                                    | antioxidative | 1  | RW  | [46-47]                                                                                                                                                                                                               |
| 8215 | Antioxidative peptide                                    | antioxidative | 2  | IR  | [468-469],[551-552]                                                                                                                                                                                                   |
| 8217 | Antioxidative peptide                                    | antioxidative | 1  | LK  | [584-585]                                                                                                                                                                                                             |

|      |                                                      |                                           |   |     |                                               |
|------|------------------------------------------------------|-------------------------------------------|---|-----|-----------------------------------------------|
| 8224 | antioxidative peptide                                | antioxidative                             | 1 | VY  | [639-640]                                     |
| 8484 | Antioxidant peptide from as1-CN (98-100)             | antioxidative                             | 1 | LLR | [409-411]                                     |
| 9082 | Antioxidative peptide                                | antioxidative                             | 2 | WG  | [355-356],[573-574]                           |
| 9086 | Antioxidative peptide                                | antioxidative                             | 1 | MM  | [626-627]                                     |
| 9361 | Antioxidative peptide                                | antioxidative                             | 1 | VYV | [639-641]                                     |
| 9363 | Antioxidative peptide                                | antioxidative                             | 1 | NEN | [707-709]                                     |
| 9366 | Antioxidative peptide                                | antioxidative                             | 1 | KYL | [398-400]                                     |
| 9368 | Antioxidative peptide                                | antioxidative                             | 2 | EQC | [100-102],[273-275]                           |
| 3164 | laminin-like peptide                                 | embryotoxic                               | 1 | RGD | [688-690]                                     |
| 4005 |                                                      | activating ubiquitin-mediated proteolysis | 3 | RA  | [446-447],[552-553],[559-560]                 |
| 4006 | Ubiquitin-mediated proteolysis activating peptide    | activating ubiquitin-mediated proteolysis | 5 | LA  | [18-19],[25-26],[686-687],[727-728],[782-783] |
| 9580 | Hypolipidemic peptide                                | hypolipidemic                             | 1 | EF  | [48-49]                                       |
| 9650 | Alpha-glucosidase inhibitor                          | alpha-glucosidase inhibitor               | 3 | EA  | [422-423],[600-601],[740-741]                 |
| 9693 | Alpha-glucosidase inhibitor                          | alpha-glucosidase inhibitor               | 2 | VE  | [642-643],[761-762]                           |
| 9694 | Alpha-glucosidase inhibitor                          | alpha-glucosidase inhibitor               | 4 | PE  | [42-43],[268-269],[333-334],[603-604]         |
| 3169 | dipeptidyl peptidase IV inhibitor (DPP IV inhibitor) | dipeptidyl peptidase IV inhibitor         | 2 | GP  | [356-357],[580-581]                           |
| 3171 | dipeptidyl peptidase IV inhibitor (DPP IV inhibitor) | dipeptidyl peptidase IV inhibitor         | 1 | MP  | [748-749]                                     |
| 3172 | dipeptidyl peptidase IV inhibitor (DPP IV inhibitor) | dipeptidyl peptidase IV inhibitor         | 1 | VA  | [526-527]                                     |
| 3173 | dipeptidyl peptidase IV inhibitor (DPP IV inhibitor) | dipeptidyl peptidase IV inhibitor         | 1 | MA  | [650-651]                                     |
| 3174 | dipeptidyl peptidase IV inhibitor (DPP IV inhibitor) | dipeptidyl peptidase IV inhibitor         | 2 | KA  | [4-5],[634-635]                               |
| 3175 | dipeptidyl peptidase IV inhibitor (DPP IV inhibitor) | dipeptidyl peptidase IV inhibitor         | 5 | LA  | [18-19],[25-26],[686-687],[727-728],[782-783] |
| 3176 | dipeptidyl peptidase IV inhibitor (DPP IV inhibitor) | dipeptidyl peptidase IV inhibitor         | 1 | FA  | [788-789]                                     |
| 3179 | dipeptidyl peptidase IV inhibitor (DPP IV inhibitor) | dipeptidyl peptidase IV inhibitor         | 2 | PA  | [471-472],[695-696]                           |
| 3180 | dipeptidyl peptidase IV inhibitor (DPP IV inhibitor) | dipeptidyl peptidase IV inhibitor         | 1 | LP  | [430-431]                                     |

|      |                                                      |                                   |   |     |                                                                     |
|------|------------------------------------------------------|-----------------------------------|---|-----|---------------------------------------------------------------------|
| 3181 | dipeptidyl peptidase IV inhibitor (DPP IV inhibitor) | dipeptidyl peptidase IV inhibitor | 3 | VP  | [470-471],[628-629],[766-767]                                       |
| 3182 | dipeptidyl peptidase IV inhibitor (DPP IV inhibitor) | dipeptidyl peptidase IV inhibitor | 2 | LL  | [409-410],[492-493]                                                 |
| 3183 | dipeptidyl peptidase IV inhibitor (DPP IV inhibitor) | dipeptidyl peptidase IV inhibitor | 5 | VV  | [418-419],[441-442],[637-638],[638-639],[641-642]                   |
| 3184 | dipeptidyl peptidase IV inhibitor (DPP IV inhibitor) | dipeptidyl peptidase IV inhibitor | 1 | HA  | [564-565]                                                           |
| 8304 | Dipeptidyl peptidase IV inhibitor (DPP IV inhibitor) | dipeptidyl peptidase IV inhibitor | 1 | IPA | [694-696]                                                           |
| 8501 | Dipeptidyl peptidase IV inhibitor (DPP IV inhibitor) | dipeptidyl peptidase IV inhibitor | 2 | IP  | [7-8],[694-695]                                                     |
| 8503 | Dipeptidyl peptidase IV inhibitor (DPP IV inhibitor) | dipeptidyl peptidase IV inhibitor | 1 | TP  | [531-532]                                                           |
| 8505 | Dipeptidyl peptidase IV inhibitor (DPP IV inhibitor) | dipeptidyl peptidase IV inhibitor | 2 | SP  | [332-333],[361-362]                                                 |
| 8518 | dipeptidyl peptidase IV inhibitor (DPP IV inhibitor) | dipeptidyl peptidase IV inhibitor | 1 | RP  | [571-572]                                                           |
| 8520 | dipeptidyl peptidase IV inhibitor (DPP IV inhibitor) | dipeptidyl peptidase IV inhibitor | 2 | HP  | [698-699],[780-781]                                                 |
| 8524 | dipeptidyl peptidase IV inhibitor (DPP IV inhibitor) | dipeptidyl peptidase IV inhibitor | 3 | GA  | [473-474],[509-510],[624-625]                                       |
| 8525 | dipeptidyl peptidase IV inhibitor (DPP IV inhibitor) | dipeptidyl peptidase IV inhibitor | 1 | IA  | [700-701]                                                           |
| 8526 | dipeptidyl peptidase IV inhibitor (DPP IV inhibitor) | dipeptidyl peptidase IV inhibitor | 3 | RA  | [446-447],[552-553],[559-560]                                       |
| 8529 | dipeptidyl peptidase IV inhibitor (DPP IV inhibitor) | dipeptidyl peptidase IV inhibitor | 1 | EP  | [94-95]                                                             |
| 8530 | dipeptidyl peptidase IV inhibitor (DPP IV inhibitor) | dipeptidyl peptidase IV inhibitor | 7 | NP  | [37-38],[147-148],[206-207],[264-265],[377-378],[424-425],[498-499] |
| 8531 | dipeptidyl peptidase IV inhibitor (DPP IV inhibitor) | dipeptidyl peptidase IV inhibitor | 2 | TA  | [683-684],[703-704]                                                 |
| 8532 | dipeptidyl peptidase IV inhibitor (DPP IV inhibitor) | dipeptidyl peptidase IV inhibitor | 2 | QP  | [114-115],[494-495]                                                 |
| 8555 | dipeptidyl peptidase IV inhibitor (DPP IV inhibitor) | dipeptidyl peptidase IV inhibitor | 4 | FL  | [10-11],[12-13],[17-18],[726-727]                                   |
| 8558 | dipeptidyl peptidase IV inhibitor (DPP IV inhibitor) | dipeptidyl peptidase IV inhibitor | 2 | EK  | [107-108],[556-557]                                                 |

|      |                                                      |                                   |   |     |                                                                   |
|------|------------------------------------------------------|-----------------------------------|---|-----|-------------------------------------------------------------------|
| 8559 | dipeptidyl peptidase IV inhibitor (DPP IV inhibitor) | dipeptidyl peptidase IV inhibitor | 5 | AL  | [15-16],[19-20],[26-27],[528-529],[560-561]                       |
| 8560 | dipeptidyl peptidase IV inhibitor (DPP IV inhibitor) | dipeptidyl peptidase IV inhibitor | 2 | SL  | [24-25],[583-584]                                                 |
| 8561 | dipeptidyl peptidase IV inhibitor (DPP IV inhibitor) | dipeptidyl peptidase IV inhibitor | 1 | GL  | [385-386]                                                         |
| 8637 | dipeptidyl peptidase IV inhibitor (DPP IV inhibitor) | dipeptidyl peptidase IV inhibitor | 2 | AA  | [507-508],[527-528]                                               |
| 8638 | dipeptidyl peptidase IV inhibitor (DPP IV inhibitor) | dipeptidyl peptidase IV inhibitor | 2 | PL  | [8-9],[781-782]                                                   |
| 8689 | dipeptidyl peptidase IV inhibitor (DPP IV inhibitor) | dipeptidyl peptidase IV inhibitor | 1 | LQP | [493-495]                                                         |
| 8691 | dipeptidyl peptidase IV inhibitor (DPP IV inhibitor) | dipeptidyl peptidase IV inhibitor | 1 | WE  | [47-48]                                                           |
| 8697 | dipeptidyl peptidase IV inhibitor (DPP IV inhibitor) | dipeptidyl peptidase IV inhibitor | 2 | WG  | [355-356],[573-574]                                               |
| 8758 | dipeptidyl peptidase IV inhibitor (DPP IV inhibitor) | dipeptidyl peptidase IV inhibitor | 2 | AE  | [436-437],[619-620]                                               |
| 8760 | dipeptidyl peptidase IV inhibitor (DPP IV inhibitor) | dipeptidyl peptidase IV inhibitor | 6 | AG  | [472-473],[508-509],[568-569],[696-697],[728-729],[789-790]       |
| 8762 | dipeptidyl peptidase IV inhibitor (DPP IV inhibitor) | dipeptidyl peptidase IV inhibitor | 4 | AS  | [360-361],[553-554],[704-705],[783-784]                           |
| 8763 | dipeptidyl peptidase IV inhibitor (DPP IV inhibitor) | dipeptidyl peptidase IV inhibitor | 3 | AT  | [447-448],[474-475],[635-636]                                     |
| 8766 | dipeptidyl peptidase IV inhibitor (DPP IV inhibitor) | dipeptidyl peptidase IV inhibitor | 1 | DN  | [200-201]                                                         |
| 8767 | dipeptidyl peptidase IV inhibitor (DPP IV inhibitor) | dipeptidyl peptidase IV inhibitor | 7 | DP  | [41-42],[91-92],[110-111],[150-151],[209-210],[267-268],[314-315] |
| 8768 | dipeptidyl peptidase IV inhibitor (DPP IV inhibitor) | dipeptidyl peptidase IV inhibitor | 3 | DQ  | [262-263],[358-359],[541-542]                                     |
| 8769 | dipeptidyl peptidase IV inhibitor (DPP IV inhibitor) | dipeptidyl peptidase IV inhibitor | 2 | DR  | [311-312],[534-535]                                               |
| 8770 | dipeptidyl peptidase IV inhibitor (DPP IV inhibitor) | dipeptidyl peptidase IV inhibitor | 3 | EG  | [394-395],[547-548],[643-644]                                     |
| 8771 | dipeptidyl peptidase IV inhibitor (DPP IV inhibitor) | dipeptidyl peptidase IV inhibitor | 3 | EH  | [160-161],[219-220],[605-606]                                     |
| 8772 | dipeptidyl peptidase IV inhibitor (DPP IV inhibitor) | dipeptidyl peptidase IV inhibitor | 4 | EI  | [88-89],[620-621],[752-753],[755-756]                             |

|      |                                                      |                                   |   |    |                                                                               |
|------|------------------------------------------------------|-----------------------------------|---|----|-------------------------------------------------------------------------------|
| 8773 | dipeptidyl peptidase IV inhibitor (DPP IV inhibitor) | dipeptidyl peptidase IV inhibitor | 8 | ES | [43-44],[365-366],[391-392],[437-438],[458-459],[514-515],[673-674],[762-763] |
| 8774 | dipeptidyl peptidase IV inhibitor (DPP IV inhibitor) | dipeptidyl peptidase IV inhibitor | 2 | ET | [28-29],[104-105]                                                             |
| 8775 | dipeptidyl peptidase IV inhibitor (DPP IV inhibitor) | dipeptidyl peptidase IV inhibitor | 1 | EV | [396-397]                                                                     |
| 8776 | dipeptidyl peptidase IV inhibitor (DPP IV inhibitor) | dipeptidyl peptidase IV inhibitor | 1 | EW | [354-355]                                                                     |
| 8777 | dipeptidyl peptidase IV inhibitor (DPP IV inhibitor) | dipeptidyl peptidase IV inhibitor | 4 | EY | [463-464],[476-477],[504-505],[662-663]                                       |
| 8778 | dipeptidyl peptidase IV inhibitor (DPP IV inhibitor) | dipeptidyl peptidase IV inhibitor | 2 | FN | [460-461],[746-747]                                                           |
| 8779 | dipeptidyl peptidase IV inhibitor (DPP IV inhibitor) | dipeptidyl peptidase IV inhibitor | 3 | FQ | [49-50],[125-126],[679-680]                                                   |
| 8780 | dipeptidyl peptidase IV inhibitor (DPP IV inhibitor) | dipeptidyl peptidase IV inhibitor | 1 | FR | [502-503]                                                                     |
| 8781 | dipeptidyl peptidase IV inhibitor (DPP IV inhibitor) | dipeptidyl peptidase IV inhibitor | 2 | GE | [393-394],[395-396]                                                           |
| 8782 | dipeptidyl peptidase IV inhibitor (DPP IV inhibitor) | dipeptidyl peptidase IV inhibitor | 2 | GF | [714-715],[790-791]                                                           |
| 8783 | dipeptidyl peptidase IV inhibitor (DPP IV inhibitor) | dipeptidyl peptidase IV inhibitor | 1 | GG | [579-580]                                                                     |
| 8784 | dipeptidyl peptidase IV inhibitor (DPP IV inhibitor) | dipeptidyl peptidase IV inhibitor | 1 | GH | [697-698]                                                                     |
| 8785 | dipeptidyl peptidase IV inhibitor (DPP IV inhibitor) | dipeptidyl peptidase IV inhibitor | 2 | GI | [412-413],[716-717]                                                           |
| 8786 | dipeptidyl peptidase IV inhibitor (DPP IV inhibitor) | dipeptidyl peptidase IV inhibitor | 1 | GV | [548-549]                                                                     |
| 8789 | dipeptidyl peptidase IV inhibitor (DPP IV inhibitor) | dipeptidyl peptidase IV inhibitor | 2 | HD | [40-41],[654-655]                                                             |
| 8790 | dipeptidyl peptidase IV inhibitor (DPP IV inhibitor) | dipeptidyl peptidase IV inhibitor | 2 | HE | [58-59],[390-391]                                                             |
| 8792 | dipeptidyl peptidase IV inhibitor (DPP IV inhibitor) | dipeptidyl peptidase IV inhibitor | 1 | HH | [39-40]                                                                       |
| 8794 | dipeptidyl peptidase IV inhibitor (DPP IV inhibitor) | dipeptidyl peptidase IV inhibitor | 3 | HR | [45-46],[320-321],[606-607]                                                   |
| 8795 | dipeptidyl peptidase IV inhibitor (DPP IV inhibitor) | dipeptidyl peptidase IV inhibitor | 1 | HS | [382-383]                                                                     |



|      |                                                      |                                   |   |    |                                       |
|------|------------------------------------------------------|-----------------------------------|---|----|---------------------------------------|
| 8799 | dipeptidyl peptidase IV inhibitor (DPP IV inhibitor) | dipeptidyl peptidase IV inhibitor | 1 | HY | [630-631]                             |
| 8801 | dipeptidyl peptidase IV inhibitor (DPP IV inhibitor) | dipeptidyl peptidase IV inhibitor | 2 | II | [550-551],[733-734]                   |
| 8802 | dipeptidyl peptidase IV inhibitor (DPP IV inhibitor) | dipeptidyl peptidase IV inhibitor | 3 | IL | [420-421],[524-525],[785-786]         |
| 8804 | dipeptidyl peptidase IV inhibitor (DPP IV inhibitor) | dipeptidyl peptidase IV inhibitor | 3 | IN | [479-480],[717-718],[734-735]         |
| 8806 | dipeptidyl peptidase IV inhibitor (DPP IV inhibitor) | dipeptidyl peptidase IV inhibitor | 2 | IR | [468-469],[551-552]                   |
| 8808 | dipeptidyl peptidase IV inhibitor (DPP IV inhibitor) | dipeptidyl peptidase IV inhibitor | 3 | KE | [145-146],[348-349],[742-743]         |
| 8810 | dipeptidyl peptidase IV inhibitor (DPP IV inhibitor) | dipeptidyl peptidase IV inhibitor | 1 | KG | [664-665]                             |
| 8812 | dipeptidyl peptidase IV inhibitor (DPP IV inhibitor) | dipeptidyl peptidase IV inhibitor | 1 | KI | [6-7]                                 |
| 8814 | dipeptidyl peptidase IV inhibitor (DPP IV inhibitor) | dipeptidyl peptidase IV inhibitor | 1 | KR | [622-623]                             |
| 8815 | dipeptidyl peptidase IV inhibitor (DPP IV inhibitor) | dipeptidyl peptidase IV inhibitor | 1 | KS | [585-586]                             |
| 8817 | dipeptidyl peptidase IV inhibitor (DPP IV inhibitor) | dipeptidyl peptidase IV inhibitor | 1 | KV | [681-682]                             |
| 8819 | dipeptidyl peptidase IV inhibitor (DPP IV inhibitor) | dipeptidyl peptidase IV inhibitor | 1 | KY | [398-399]                             |
| 8823 | dipeptidyl peptidase IV inhibitor (DPP IV inhibitor) | dipeptidyl peptidase IV inhibitor | 2 | LN | [36-37],[529-530]                     |
| 8824 | dipeptidyl peptidase IV inhibitor (DPP IV inhibitor) | dipeptidyl peptidase IV inhibitor | 1 | LT | [449-450]                             |
| 8825 | dipeptidyl peptidase IV inhibitor (DPP IV inhibitor) | dipeptidyl peptidase IV inhibitor | 4 | LV | [20-21],[525-526],[615-616],[712-713] |
| 8826 | dipeptidyl peptidase IV inhibitor (DPP IV inhibitor) | dipeptidyl peptidase IV inhibitor | 1 | ME | [768-769]                             |
| 8833 | dipeptidyl peptidase IV inhibitor (DPP IV inhibitor) | dipeptidyl peptidase IV inhibitor | 1 | MM | [626-627]                             |
| 8837 | dipeptidyl peptidase IV inhibitor (DPP IV inhibitor) | dipeptidyl peptidase IV inhibitor | 3 | MV | [1-2],[489-490],[627-628]             |
| 8840 | dipeptidyl peptidase IV inhibitor (DPP IV inhibitor) | dipeptidyl peptidase IV inhibitor | 2 | ND | [201-202],[522-523]                   |

|      |                                                      |                                   |   |    |                                         |
|------|------------------------------------------------------|-----------------------------------|---|----|-----------------------------------------|
| 8841 | dipeptidyl peptidase IV inhibitor (DPP IV inhibitor) | dipeptidyl peptidase IV inhibitor | 3 | NE | [34-35],[484-485],[707-708]             |
| 8842 | dipeptidyl peptidase IV inhibitor (DPP IV inhibitor) | dipeptidyl peptidase IV inhibitor | 1 | NF | [725-726]                               |
| 8843 | dipeptidyl peptidase IV inhibitor (DPP IV inhibitor) | dipeptidyl peptidase IV inhibitor | 1 | NG | [718-719]                               |
| 8845 | dipeptidyl peptidase IV inhibitor (DPP IV inhibitor) | dipeptidyl peptidase IV inhibitor | 2 | NL | [461-462],[709-710]                     |
| 8846 | dipeptidyl peptidase IV inhibitor (DPP IV inhibitor) | dipeptidyl peptidase IV inhibitor | 1 | NM | [747-748]                               |
| 8847 | dipeptidyl peptidase IV inhibitor (DPP IV inhibitor) | dipeptidyl peptidase IV inhibitor | 3 | NN | [497-498],[721-722],[731-732]           |
| 8848 | dipeptidyl peptidase IV inhibitor (DPP IV inhibitor) | dipeptidyl peptidase IV inhibitor | 4 | NQ | [480-481],[593-594],[722-723],[735-736] |
| 8850 | dipeptidyl peptidase IV inhibitor (DPP IV inhibitor) | dipeptidyl peptidase IV inhibitor | 2 | NT | [426-427],[530-531]                     |
| 8853 | dipeptidyl peptidase IV inhibitor (DPP IV inhibitor) | dipeptidyl peptidase IV inhibitor | 2 | NY | [415-416],[617-618]                     |
| 8855 | dipeptidyl peptidase IV inhibitor (DPP IV inhibitor) | dipeptidyl peptidase IV inhibitor | 1 | PG | [499-500]                               |
| 8856 | dipeptidyl peptidase IV inhibitor (DPP IV inhibitor) | dipeptidyl peptidase IV inhibitor | 3 | PH | [38-39],[629-630],[653-654]             |
| 8857 | dipeptidyl peptidase IV inhibitor (DPP IV inhibitor) | dipeptidyl peptidase IV inhibitor | 2 | PI | [581-582],[699-700]                     |
| 8859 | dipeptidyl peptidase IV inhibitor (DPP IV inhibitor) | dipeptidyl peptidase IV inhibitor | 1 | PM | [767-768]                               |
| 8860 | dipeptidyl peptidase IV inhibitor (DPP IV inhibitor) | dipeptidyl peptidase IV inhibitor | 1 | PN | [425-426]                               |
| 8861 | dipeptidyl peptidase IV inhibitor (DPP IV inhibitor) | dipeptidyl peptidase IV inhibitor | 2 | PQ | [115-116],[315-316]                     |
| 8864 | dipeptidyl peptidase IV inhibitor (DPP IV inhibitor) | dipeptidyl peptidase IV inhibitor | 1 | PV | [495-496]                               |
| 8865 | dipeptidyl peptidase IV inhibitor (DPP IV inhibitor) | dipeptidyl peptidase IV inhibitor | 1 | PW | [572-573]                               |
| 8866 | dipeptidyl peptidase IV inhibitor (DPP IV inhibitor) | dipeptidyl peptidase IV inhibitor | 2 | PY | [378-379],[431-432]                     |
| 8867 | dipeptidyl peptidase IV inhibitor (DPP IV inhibitor) | dipeptidyl peptidase IV inhibitor | 2 | QA | [65-66],[359-360]                       |

|      |                                                      |                                   |    |    |                                                                                                                                                                                                                 |
|------|------------------------------------------------------|-----------------------------------|----|----|-----------------------------------------------------------------------------------------------------------------------------------------------------------------------------------------------------------------|
| 8868 | dipeptidyl peptidase IV inhibitor (DPP IV inhibitor) | dipeptidyl peptidase IV inhibitor | 3  | QD | [109-110],[313-314],[481-482]                                                                                                                                                                                   |
| 8869 | dipeptidyl peptidase IV inhibitor (DPP IV inhibitor) | dipeptidyl peptidase IV inhibitor | 14 | QE | [53-54],[126-127],[129-130],[190-191],[218-219],[249-250],[286-287],[301-302],[329-330],[454-455],[543-544],[555-556],[610-611],[669-670]                                                                       |
| 8870 | dipeptidyl peptidase IV inhibitor (DPP IV inhibitor) | dipeptidyl peptidase IV inhibitor | 5  | QF | [124-125],[501-502],[594-595],[597-598],[678-679]                                                                                                                                                               |
| 8871 | dipeptidyl peptidase IV inhibitor (DPP IV inhibitor) | dipeptidyl peptidase IV inhibitor | 7  | QG | [165-166],[167-168],[224-225],[226-227],[351-352],[384-385],[776-777]                                                                                                                                           |
| 8872 | dipeptidyl peptidase IV inhibitor (DPP IV inhibitor) | dipeptidyl peptidase IV inhibitor | 2  | QH | [57-58],[563-564]                                                                                                                                                                                               |
| 8874 | dipeptidyl peptidase IV inhibitor (DPP IV inhibitor) | dipeptidyl peptidase IV inhibitor | 4  | QL | [76-77],[289-290],[608-609],[736-737]                                                                                                                                                                           |
| 8875 | dipeptidyl peptidase IV inhibitor (DPP IV inhibitor) | dipeptidyl peptidase IV inhibitor | 3  | QN | [263-264],[706-707],[730-731]                                                                                                                                                                                   |
| 8876 | dipeptidyl peptidase IV inhibitor (DPP IV inhibitor) | dipeptidyl peptidase IV inhibitor | 21 | QQ | [50-51],[67-68],[113-114],[128-129],[171-172],[172-173],[173-174],[230-231],[231-232],[232-233],[276-277],[277-278],[288-289],[297-298],[300-301],[316-317],[317-318],[340-341],[350-351],[373-374],[542-543]   |
| 8877 | dipeptidyl peptidase IV inhibitor (DPP IV inhibitor) | dipeptidyl peptidase IV inhibitor | 6  | QS | [176-177],[235-236],[331-332],[511-512],[659-660],[771-772]                                                                                                                                                     |
| 8878 | dipeptidyl peptidase IV inhibitor (DPP IV inhibitor) | dipeptidyl peptidase IV inhibitor | 1  | QT | [327-328]                                                                                                                                                                                                       |
| 8879 | dipeptidyl peptidase IV inhibitor (DPP IV inhibitor) | dipeptidyl peptidase IV inhibitor | 1  | QV | [760-761]                                                                                                                                                                                                       |
| 8881 | dipeptidyl peptidase IV inhibitor (DPP IV inhibitor) | dipeptidyl peptidase IV inhibitor | 5  | QY | [98-99],[154-155],[213-214],[318-319],[346-347]                                                                                                                                                                 |
| 8882 | dipeptidyl peptidase IV inhibitor (DPP IV inhibitor) | dipeptidyl peptidase IV inhibitor | 12 | RG | [61-62],[138-139],[197-198],[256-257],[284-285],[308-309],[367-368],[411-412],[444-445],[623-624],[688-689],[774-775]                                                                                           |
| 8883 | dipeptidyl peptidase IV inhibitor (DPP IV inhibitor) | dipeptidyl peptidase IV inhibitor | 2  | RH | [375-376],[389-390]                                                                                                                                                                                             |
| 8885 | dipeptidyl peptidase IV inhibitor (DPP IV inhibitor) | dipeptidyl peptidase IV inhibitor | 2  | RK | [96-97],[247-248]                                                                                                                                                                                               |
| 8886 | dipeptidyl peptidase IV inhibitor (DPP IV inhibitor) | dipeptidyl peptidase IV inhibitor | 5  | RL | [241-242],[486-487],[535-536],[685-686],[711-712]                                                                                                                                                               |
| 8888 | dipeptidyl peptidase IV inhibitor (DPP IV inhibitor) | dipeptidyl peptidase IV inhibitor | 1  | RN | [724-725]                                                                                                                                                                                                       |
| 8889 | dipeptidyl peptidase IV inhibitor (DPP IV inhibitor) | dipeptidyl peptidase IV inhibitor | 21 | RR | [71-72],[119-120],[133-134],[136-137],[137-138],[163-164],[188-189],[195-196],[196-197],[222-223],[254-255],[255-256],[283-284],[292-293],[293-294],[324-325],[363-364],[456-457],[575-576],[666-667],[773-774] |
| 8890 | dipeptidyl peptidase IV inhibitor (DPP IV inhibitor) | dipeptidyl peptidase IV inhibitor | 1  | RW | [46-47]                                                                                                                                                                                                         |

|      |                                                      |                                   |   |    |                                                             |
|------|------------------------------------------------------|-----------------------------------|---|----|-------------------------------------------------------------|
| 8891 | dipeptidyl peptidase IV inhibitor (DPP IV inhibitor) | dipeptidyl peptidase IV inhibitor | 2 | SF | [459-460],[745-746]                                         |
| 8892 | dipeptidyl peptidase IV inhibitor (DPP IV inhibitor) | dipeptidyl peptidase IV inhibitor | 1 | SH | [44-45]                                                     |
| 8893 | dipeptidyl peptidase IV inhibitor (DPP IV inhibitor) | dipeptidyl peptidase IV inhibitor | 1 | SI | [784-785]                                                   |
| 8894 | dipeptidyl peptidase IV inhibitor (DPP IV inhibitor) | dipeptidyl peptidase IV inhibitor | 1 | SK | [633-634]                                                   |
| 8895 | dipeptidyl peptidase IV inhibitor (DPP IV inhibitor) | dipeptidyl peptidase IV inhibitor | 1 | SV | [438-439]                                                   |
| 8897 | dipeptidyl peptidase IV inhibitor (DPP IV inhibitor) | dipeptidyl peptidase IV inhibitor | 4 | SY | [515-516],[590-591],[660-661],[763-764]                     |
| 8899 | dipeptidyl peptidase IV inhibitor (DPP IV inhibitor) | dipeptidyl peptidase IV inhibitor | 5 | TE | [29-30],[404-405],[407-408],[475-476],[513-514]             |
| 8900 | dipeptidyl peptidase IV inhibitor (DPP IV inhibitor) | dipeptidyl peptidase IV inhibitor | 2 | TF | [427-428],[450-451]                                         |
| 8901 | dipeptidyl peptidase IV inhibitor (DPP IV inhibitor) | dipeptidyl peptidase IV inhibitor | 2 | TG | [645-646],[676-677]                                         |
| 8904 | dipeptidyl peptidase IV inhibitor (DPP IV inhibitor) | dipeptidyl peptidase IV inhibitor | 1 | TK | [3-4]                                                       |
| 8905 | dipeptidyl peptidase IV inhibitor (DPP IV inhibitor) | dipeptidyl peptidase IV inhibitor | 1 | TL | [448-449]                                                   |
| 8908 | dipeptidyl peptidase IV inhibitor (DPP IV inhibitor) | dipeptidyl peptidase IV inhibitor | 1 | TQ | [328-329]                                                   |
| 8909 | dipeptidyl peptidase IV inhibitor (DPP IV inhibitor) | dipeptidyl peptidase IV inhibitor | 1 | TR | [443-444]                                                   |
| 8912 | dipeptidyl peptidase IV inhibitor (DPP IV inhibitor) | dipeptidyl peptidase IV inhibitor | 1 | TV | [636-637]                                                   |
| 8915 | dipeptidyl peptidase IV inhibitor (DPP IV inhibitor) | dipeptidyl peptidase IV inhibitor | 1 | VD | [90-91]                                                     |
| 8916 | dipeptidyl peptidase IV inhibitor (DPP IV inhibitor) | dipeptidyl peptidase IV inhibitor | 2 | VE | [642-643],[761-762]                                         |
| 8917 | dipeptidyl peptidase IV inhibitor (DPP IV inhibitor) | dipeptidyl peptidase IV inhibitor | 1 | VF | [519-520]                                                   |
| 8918 | dipeptidyl peptidase IV inhibitor (DPP IV inhibitor) | dipeptidyl peptidase IV inhibitor | 1 | VG | [713-714]                                                   |
| 8920 | dipeptidyl peptidase IV inhibitor (DPP IV inhibitor) | dipeptidyl peptidase IV inhibitor | 6 | VI | [419-420],[439-440],[467-468],[478-479],[549-550],[693-694] |

|      |                                                      |                                    |   |    |                               |
|------|------------------------------------------------------|------------------------------------|---|----|-------------------------------|
| 8921 | dipeptidyl peptidase IV inhibitor (DPP IV inhibitor) | dipeptidyl peptidase IV inhibitor  | 2 | VK | [397-398],[490-491]           |
| 8922 | dipeptidyl peptidase IV inhibitor (DPP IV inhibitor) | dipeptidyl peptidase IV inhibitor  | 2 | VL | [429-430],[614-615]           |
| 8924 | dipeptidyl peptidase IV inhibitor (DPP IV inhibitor) | dipeptidyl peptidase IV inhibitor  | 2 | VN | [496-497],[616-617]           |
| 8926 | dipeptidyl peptidase IV inhibitor (DPP IV inhibitor) | dipeptidyl peptidase IV inhibitor  | 2 | VS | [452-453],[656-657]           |
| 8927 | dipeptidyl peptidase IV inhibitor (DPP IV inhibitor) | dipeptidyl peptidase IV inhibitor  | 3 | VT | [2-3],[442-443],[682-683]     |
| 8929 | dipeptidyl peptidase IV inhibitor (DPP IV inhibitor) | dipeptidyl peptidase IV inhibitor  | 1 | VY | [639-640]                     |
| 8932 | dipeptidyl peptidase IV inhibitor (DPP IV inhibitor) | dipeptidyl peptidase IV inhibitor  | 2 | YA | [506-507],[618-619]           |
| 8934 | dipeptidyl peptidase IV inhibitor (DPP IV inhibitor) | dipeptidyl peptidase IV inhibitor  | 3 | YE | [99-100],[272-273],[661-662]  |
| 8935 | dipeptidyl peptidase IV inhibitor (DPP IV inhibitor) | dipeptidyl peptidase IV inhibitor  | 2 | YF | [380-381],[764-765]           |
| 8936 | dipeptidyl peptidase IV inhibitor (DPP IV inhibitor) | dipeptidyl peptidase IV inhibitor  | 1 | YG | [464-465]                     |
| 8937 | dipeptidyl peptidase IV inhibitor (DPP IV inhibitor) | dipeptidyl peptidase IV inhibitor  | 2 | YH | [319-320],[432-433]           |
| 8939 | dipeptidyl peptidase IV inhibitor (DPP IV inhibitor) | dipeptidyl peptidase IV inhibitor  | 2 | YK | [347-348],[663-664]           |
| 8940 | dipeptidyl peptidase IV inhibitor (DPP IV inhibitor) | dipeptidyl peptidase IV inhibitor  | 2 | YL | [399-400],[516-517]           |
| 8942 | dipeptidyl peptidase IV inhibitor (DPP IV inhibitor) | dipeptidyl peptidase IV inhibitor  | 1 | YN | [631-632]                     |
| 8944 | dipeptidyl peptidase IV inhibitor (DPP IV inhibitor) | dipeptidyl peptidase IV inhibitor  | 3 | YR | [155-156],[214-215],[416-417] |
| 8945 | dipeptidyl peptidase IV inhibitor (DPP IV inhibitor) | dipeptidyl peptidase IV inhibitor  | 1 | YS | [591-592]                     |
| 8946 | dipeptidyl peptidase IV inhibitor (DPP IV inhibitor) | dipeptidyl peptidase IV inhibitor  | 2 | YV | [477-478],[640-641]           |
| 8948 | dipeptidyl peptidase IV inhibitor (DPP IV inhibitor) | dipeptidyl peptidase IV inhibitor  | 2 | YY | [379-380],[505-506]           |
| 9476 | DPP-III inhibitor                                    | dipeptidyl peptidase III inhibitor | 2 | YY | [379-380],[505-506]           |

|      |                   |                                    |    |    |                                                                                                                                                                                                                 |
|------|-------------------|------------------------------------|----|----|-----------------------------------------------------------------------------------------------------------------------------------------------------------------------------------------------------------------|
| 9477 | DPP-III inhibitor | dipeptidyl peptidase III inhibitor | 1  | RW | [46-47]                                                                                                                                                                                                         |
| 9478 | DPP-III inhibitor | dipeptidyl peptidase III inhibitor | 6  | LR | [77-78],[386-387],[410-411],[517-518],[558-559],[710-711]                                                                                                                                                       |
| 9480 | DPP-III inhibitor | dipeptidyl peptidase III inhibitor | 2  | YF | [380-381],[764-765]                                                                                                                                                                                             |
| 9481 | DPP-III inhibitor | dipeptidyl peptidase III inhibitor | 2  | YH | [319-320],[432-433]                                                                                                                                                                                             |
| 9482 | DPP-III inhibitor | dipeptidyl peptidase III inhibitor | 2  | YL | [399-400],[516-517]                                                                                                                                                                                             |
| 9483 | DPP-III inhibitor | dipeptidyl peptidase III inhibitor | 2  | YK | [347-348],[663-664]                                                                                                                                                                                             |
| 9484 | DPP-III inhibitor | dipeptidyl peptidase III inhibitor | 3  | YR | [155-156],[214-215],[416-417]                                                                                                                                                                                   |
| 9485 | DPP-III inhibitor | dipeptidyl peptidase III inhibitor | 21 | RR | [71-72],[119-120],[133-134],[136-137],[137-138],[163-164],[188-189],[195-196],[196-197],[222-223],[254-255],[255-256],[283-284],[292-293],[293-294],[324-325],[363-364],[456-457],[575-576],[666-667],[773-774] |
| 9486 | DPP-III inhibitor | dipeptidyl peptidase III inhibitor | 2  | TF | [427-428],[450-451]                                                                                                                                                                                             |
| 9487 | DPP-III inhibitor | dipeptidyl peptidase III inhibitor | 2  | GE | [393-394],[395-396]                                                                                                                                                                                             |
| 9488 | DPP-III inhibitor | dipeptidyl peptidase III inhibitor | 2  | GF | [714-715],[790-791]                                                                                                                                                                                             |
| 9489 | DPP-III inhibitor | dipeptidyl peptidase III inhibitor | 11 | PR | [92-93],[95-96],[111-112],[148-149],[151-152],[207-208],[210-211],[265-266],[362-363],[532-533],[749-750]                                                                                                       |
| 9490 | DPP-III inhibitor | dipeptidyl peptidase III inhibitor | 4  | RF | [182-183],[402-403],[538-539],[647-648]                                                                                                                                                                         |
| 9491 | DPP-III inhibitor | dipeptidyl peptidase III inhibitor | 3  | RV | [417-418],[469-470],[518-519]                                                                                                                                                                                   |
| 9492 | DPP-III inhibitor | dipeptidyl peptidase III inhibitor | 1  | DA | [435-436]                                                                                                                                                                                                       |
| 9494 | DPP-III inhibitor | dipeptidyl peptidase III inhibitor | 1  | HK | [433-434]                                                                                                                                                                                                       |
| 9496 | DPP-III inhibitor | dipeptidyl peptidase III inhibitor | 2  | HP | [698-699],[780-781]                                                                                                                                                                                             |
| 9499 | DPP-III inhibitor | dipeptidyl peptidase III inhibitor | 5  | LA | [18-19],[25-26],[686-687],[727-728],[782-783]                                                                                                                                                                   |
| 9500 | DPP-III inhibitor | dipeptidyl peptidase III inhibitor | 1  | FA | [788-789]                                                                                                                                                                                                       |

|      |                   |                                    |   |    |                                                           |
|------|-------------------|------------------------------------|---|----|-----------------------------------------------------------|
| 9501 | DPP-III inhibitor | dipeptidyl peptidase III inhibitor | 1 | FR | [502-503]                                                 |
| 9502 | DPP-III inhibitor | dipeptidyl peptidase III inhibitor | 4 | FL | [10-11],[12-13],[17-18],[726-727]                         |
| 9504 | DPP-III inhibitor | dipeptidyl peptidase III inhibitor | 4 | PE | [42-43],[268-269],[333-334],[603-604]                     |
| 9508 | DPP-III inhibitor | dipeptidyl peptidase III inhibitor | 1 | YG | [464-465]                                                 |
| 9509 | DPP-III inhibitor | dipeptidyl peptidase III inhibitor | 1 | VY | [639-640]                                                 |
| 9511 | DPP-III inhibitor | dipeptidyl peptidase III inhibitor | 2 | KA | [4-5],[634-635]                                           |
| 8247 | CaMPDE inhibitor  | CaMPDE inhibitor                   | 2 | IR | [468-469],[551-552]                                       |
| 8250 | CaMPDE inhibitor  | CaMPDE inhibitor                   | 1 | EF | [48-49]                                                   |
| 2835 | Renin inhibitor   | renin inhibitor                    | 1 | FT | [403-404]                                                 |
| 2842 | Renin inhibitor   | renin inhibitor                    | 6 | LR | [77-78],[386-387],[410-411],[517-518],[558-559],[710-711] |
| 8246 | renin inhibitor   | renin inhibitor                    | 2 | IR | [468-469],[551-552]                                       |
| 8251 | Renin inhibitor   | renin inhibitor                    | 1 | EF | [48-49]                                                   |
| 9431 | Renin inhibitor   | renin inhibitor                    | 5 | QF | [124-125],[501-502],[594-595],[597-598],[678-679]         |
| 9432 | Renin inhibitor   | renin inhibitor                    | 2 | SF | [459-460],[745-746]                                       |
| 9433 | Renin inhibitor   | renin inhibitor                    | 2 | YA | [506-507],[618-619]                                       |
| 9471 | Renin inhibitor   | renin inhibitor                    | 2 | TF | [427-428],[450-451]                                       |

Table S12. Profile of potential biological activity of fragments of protein Car i 4.0101.

| ID   | Name of peptide                         | Activity      | Number | Sequence | Location                                          |
|------|-----------------------------------------|---------------|--------|----------|---------------------------------------------------|
| 3460 | Prolyl endopeptidase inhibitor          | antiamnestic  | 1      | PG       | [111-112]                                         |
| 3257 | beta-lactokinin                         | ACE inhibitor | 3      | RL       | [41-42],[256-257],[479-480]                       |
| 3258 | beta-lactokinin                         | ACE inhibitor | 3      | IR       | [140-141],[278-279],[458-459]                     |
| 3381 | ACE inhibitor                           | ACE inhibitor | 2      | LY       | [370-371],[375-376]                               |
| 3383 | ACE inhibitor                           | ACE inhibitor | 2      | IY       | [9-10],[339-340]                                  |
| 3384 | ACE inhibitor                           | ACE inhibitor | 2      | VF       | [234-235],[407-408]                               |
| 3492 | ACE inhibitor from sake                 | ACE inhibitor | 2      | VY       | [97-98],[388-389]                                 |
| 3494 | ACE inhibitor from sake                 | ACE inhibitor | 1      | HY       | [89-90]                                           |
| 3502 | ACE inhibitor (BSA fr. 221-222)         | ACE inhibitor | 2      | FP       | [110-111],[151-152]                               |
| 3528 | ACE inhibitor                           | ACE inhibitor | 1      | LVR      | [489-491]                                         |
| 3537 | ACE inhibitor                           | ACE inhibitor | 3      | PR       | [186-187],[280-281],[473-474]                     |
| 3538 | ACE inhibitor                           | ACE inhibitor | 1      | VSP      | [448-450]                                         |
| 3547 | ACE inhibitor                           | ACE inhibitor | 1      | IRA      | [458-460]                                         |
| 3551 | ACE inhibitor (from bovine beta-Lg)     | ACE inhibitor | 2      | LF       | [18-19],[109-110]                                 |
| 3556 | ACE inhibitor                           | ACE inhibitor | 1      | FY       | [189-190]                                         |
| 3573 |                                         | ACE inhibitor | 1      | AFP      | [150-152]                                         |
| 3713 | ACE inhibitor from alpha-zein           | ACE inhibitor | 1      | LLP      | [86-88]                                           |
| 7414 | ACE inhibitor                           | ACE inhibitor | 1      | LRW      | [358-360]                                         |
| 7502 | ACE inhibitor                           | ACE inhibitor | 1      | IVR      | [267-269]                                         |
| 7513 | ACE inhibitor from Alaskan pollack skin | ACE inhibitor | 1      | PL       | [450-451]                                         |
| 7547 | ACE inhibitor                           | ACE inhibitor | 1      | IRP      | [278-280]                                         |
| 7558 | ACE inhibitor from buckwheat            | ACE inhibitor | 1      | VK       | [427-428]                                         |
| 7562 | ACE inhibitor from soy hydrolysate      | ACE inhibitor | 2      | IA       | [99-100],[149-150]                                |
| 7580 | ACE inhibitor                           | ACE inhibitor | 2      | RW       | [281-282],[359-360]                               |
| 7581 | ACE inhibitor                           | ACE inhibitor | 2      | IP       | [420-421],[472-473]                               |
| 7582 | ACE inhibitor                           | ACE inhibitor | 2      | RP       | [200-201],[279-280]                               |
| 7583 | ACE inhibitor                           | ACE inhibitor | 3      | AF       | [150-151],[246-247],[469-470]                     |
| 7584 | ACE inhibitor                           | ACE inhibitor | 1      | AP       | [93-94]                                           |
| 7585 | ACE inhibitor                           | ACE inhibitor | 4      | LA       | [23-24],[191-192],[243-244],[451-452]             |
| 7586 | ACE inhibitor                           | ACE inhibitor | 1      | KR       | [428-429]                                         |
| 7587 | ACE inhibitor                           | ACE inhibitor | 1      | VP       | [377-378]                                         |
| 7588 | ACE inhibitor                           | ACE inhibitor | 5      | RA       | [336-337],[394-395],[429-430],[459-460],[502-503] |
| 7589 | ACE inhibitor                           | ACE inhibitor | 1      | YA       | [389-390]                                         |



|      |                                     |               |   |     |                                                                                         |
|------|-------------------------------------|---------------|---|-----|-----------------------------------------------------------------------------------------|
| 7591 | ACE inhibitor                       | ACE inhibitor | 2 | GF  | [237-238],[434-435]                                                                     |
| 7592 | ACE inhibitor                       | ACE inhibitor | 2 | FR  | [143-144],[199-200]                                                                     |
| 7593 | ACE inhibitor                       | ACE inhibitor | 1 | IF  | [170-171]                                                                               |
| 7595 | ACE inhibitor                       | ACE inhibitor | 1 | IG  | [331-332]                                                                               |
| 7596 | ACE inhibitor                       | ACE inhibitor | 1 | GI  | [104-105]                                                                               |
| 7598 | ACE inhibitor                       | ACE inhibitor | 1 | GA  | [368-369]                                                                               |
| 7599 | ACE inhibitor                       | ACE inhibitor | 2 | GL  | [84-85],[317-318]                                                                       |
| 7600 | ACE inhibitor                       | ACE inhibitor | 6 | AG  | [55-56],[71-72],[153-154],[192-193],[344-345],[452-453]                                 |
| 7603 | ACE inhibitor                       | ACE inhibitor | 7 | GR  | [28-29],[102-103],[272-273],[312-313],[345-346],[393-394],[453-454]                     |
| 7605 | ACE inhibitor                       | ACE inhibitor | 2 | FG  | [34-35],[403-404]                                                                       |
| 7606 | ACE inhibitor                       | ACE inhibitor | 5 | DA  | [43-44],[239-240],[245-246],[373-374],[476-477]                                         |
| 7607 | ACE inhibitor                       | ACE inhibitor | 2 | GS  | [163-164],[265-266]                                                                     |
| 7608 | ACE inhibitor                       | ACE inhibitor | 4 | GV  | [56-57],[72-73],[107-108],[154-155]                                                     |
| 7610 | ACE inhibitor                       | ACE inhibitor | 5 | GQ  | [35-36],[127-128],[203-204],[404-405],[415-416]                                         |
| 7614 | ACE inhibitor                       | ACE inhibitor | 1 | HG  | [223-224]                                                                               |
| 7615 | ACE inhibitor                       | ACE inhibitor | 2 | GE  | [221-222],[224-225]                                                                     |
| 7616 | ACE inhibitor                       | ACE inhibitor | 2 | GG  | [27-28],[311-312]                                                                       |
| 7617 | ACE inhibitor                       | ACE inhibitor | 2 | QG  | [126-127],[202-203]                                                                     |
| 7618 | ACE inhibitor                       | ACE inhibitor | 2 | SG  | [26-27],[236-237]                                                                       |
| 7619 | ACE inhibitor                       | ACE inhibitor | 1 | LG  | [230-231]                                                                               |
| 7620 | ACE inhibitor                       | ACE inhibitor | 2 | GD  | [146-147],[332-333]                                                                     |
| 7621 | ACE inhibitor                       | ACE inhibitor | 1 | TG  | [106-107]                                                                               |
| 7622 | ACE inhibitor                       | ACE inhibitor | 4 | EG  | [145-146],[271-272],[414-415],[433-434]                                                 |
| 7623 | ACE inhibitor                       | ACE inhibitor | 3 | EA  | [52-53],[54-55],[343-344]                                                               |
| 7624 | ACE inhibitor                       | ACE inhibitor | 3 | NG  | [20-21],[83-84],[316-317]                                                               |
| 7625 | ACE inhibitor                       | ACE inhibitor | 1 | PG  | [111-112]                                                                               |
| 7628 | ACE inhibitor from k-CN (fr. 67-68) | ACE inhibitor | 3 | VR  | [76-77],[268-269],[490-491]                                                             |
| 7634 | ACE inhibitor from k-CN (fr. 21-23) | ACE inhibitor | 1 | YVP | [376-378]                                                                               |
| 7635 | ACE inhibitor from k-CN (fr. 51-53) | ACE inhibitor | 1 | VAV | [73-75]                                                                                 |
| 7680 | ACE inhibitor from pea vicilin      | ACE inhibitor | 1 | QK  | [138-139]                                                                               |
| 7681 | ACE inhibitor from soy              | ACE inhibitor | 1 | DG  | [162-163]                                                                               |
| 7683 | ACE inhibitor from garlic           | ACE inhibitor | 3 | NF  | [188-189],[402-403],[423-424]                                                           |
| 7685 | ACE inhibitor from garlic           | ACE inhibitor | 1 | SF  | [439-440]                                                                               |
| 7692 | ACE inhibitor                       | ACE inhibitor | 2 | KF  | [33-34],[481-482]                                                                       |
| 7741 | ACE inhibitor                       | ACE inhibitor | 9 | RR  | [77-78],[129-130],[211-212],[219-220],[255-256],[305-306],[309-310],[478-479],[501-502] |

|      |                                           |               |   |      |                                                                       |
|------|-------------------------------------------|---------------|---|------|-----------------------------------------------------------------------|
| 7742 | ACE inhibitor                             | ACE inhibitor | 4 | AR   | [100-101],[254-255],[430-431],[477-478]                               |
| 7752 | ACE inhibitor from shark meat hydrolysate | ACE inhibitor | 1 | EY   | [206-207]                                                             |
| 7810 | ACE inhibitor from anchovy and bonito     | ACE inhibitor | 1 | KP   | [3-4]                                                                 |
| 7827 | ACE inhibitor                             | ACE inhibitor | 3 | IE   | [51-52],[58-59],[80-81]                                               |
| 7828 | ACE inhibitor                             | ACE inhibitor | 3 | EV   | [396-397],[464-465],[504-505]                                         |
| 7829 | ACE inhibitor                             | ACE inhibitor | 1 | VE   | [270-271]                                                             |
| 7830 | ACE inhibitor                             | ACE inhibitor | 2 | TE   | [251-252],[341-342]                                                   |
| 7831 | ACE inhibitor                             | ACE inhibitor | 4 | LQ   | [68-69],[257-258],[275-276],[361-362]                                 |
| 7832 | ACE inhibitor                             | ACE inhibitor | 2 | LN   | [39-40],[382-383]                                                     |
| 7833 | ACE inhibitor                             | ACE inhibitor | 1 | PT   | [47-48]                                                               |
| 7835 | ACE inhibitor                             | ACE inhibitor | 2 | AH   | [156-157],[384-385]                                                   |
| 7837 | ACE inhibitor                             | ACE inhibitor | 3 | PQ   | [94-95],[201-202],[421-422]                                           |
| 7838 | ACE inhibitor                             | ACE inhibitor | 1 | EW   | [436-437]                                                             |
| 7841 | ACE inhibitor                             | ACE inhibitor | 1 | KE   | [293-294]                                                             |
| 7843 | ACE inhibitor                             | ACE inhibitor | 2 | PH   | [88-89],[378-379]                                                     |
| 7844 | ACE inhibitor                             | ACE inhibitor | 1 | HK   | [32-33]                                                               |
| 7859 | ACE inhibitor                             | ACE inhibitor | 1 | IEP  | [80-82]                                                               |
| 8182 | ACE Inhibitor                             | ACE inhibitor | 1 | ALEP | [44-47]                                                               |
| 8185 | ACE inhibitor                             | ACE inhibitor | 1 | TF   | [116-117]                                                             |
| 8193 | ACE inhibitor                             | ACE inhibitor | 2 | AI   | [169-170],[457-458]                                                   |
| 8402 | ACE inhibitor                             | ACE inhibitor | 1 | LVY  | [96-98]                                                               |
| 8951 | ACE inhibitor                             | ACE inhibitor | 2 | AV   | [74-75],[425-426]                                                     |
| 9029 | ACE inhibitor                             | ACE inhibitor | 1 | ALP  | [460-462]                                                             |
| 9031 | ACE inhibitor                             | ACE inhibitor | 1 | LEE  | [318-320]                                                             |
| 9039 | ACE inhibitor                             | ACE inhibitor | 1 | IFL  | [170-172]                                                             |
| 9046 | ACE inhibitor                             | ACE inhibitor | 1 | VQV  | [397-399]                                                             |
| 9076 | ACE inhibitor                             | ACE inhibitor | 2 | FQ   | [132-133],[470-471]                                                   |
| 9077 | ACE inhibitor                             | ACE inhibitor | 1 | YV   | [376-377]                                                             |
| 9078 | ACE inhibitor                             | ACE inhibitor | 1 | YE   | [207-208]                                                             |
| 9079 | ACE inhibitor                             | ACE inhibitor | 2 | IL   | [5-6],[357-358]                                                       |
| 9107 | ACE inhibitor                             | ACE inhibitor | 1 | WL   | [360-361]                                                             |
| 9160 | ACE inhibitor                             | ACE inhibitor | 1 | TLS  | [324-326]                                                             |
| 9173 | ACE inhibitor                             | ACE inhibitor | 7 | RG   | [101-102],[103-104],[220-221],[264-265],[310-311],[367-368],[392-393] |
| 9184 | ACE inhibitor                             | ACE inhibitor | 2 | ST   | [348-349],[487-488]                                                   |
| 9185 | ACE inhibitor                             | ACE inhibitor | 1 | YN   | [160-161]                                                             |
| 9196 | ACE inhibitor                             | ACE inhibitor | 2 | AVV  | [74-76],[425-427]                                                     |

|      |                                                                      |                   |   |       |                                                             |
|------|----------------------------------------------------------------------|-------------------|---|-------|-------------------------------------------------------------|
| 9213 | ACE inhibitor                                                        | ACE inhibitor     | 4 | LR    | [327-328],[358-359],[391-392],[412-413]                     |
| 9265 | ACE inhibitor                                                        | ACE inhibitor     | 1 | TLS   | [324-326]                                                   |
| 9468 | ACE inhibitor                                                        | ACE inhibitor     | 1 | RALP  | [459-462]                                                   |
| 9708 | ACE inhibitor                                                        | ACE inhibitor     | 1 | LPILR | [355-359]                                                   |
| 9729 | ACE inhibitor                                                        | ACE inhibitor     | 1 | VVR   | [75-77]                                                     |
| 9730 | ACE inhibitor                                                        | ACE inhibitor     | 1 | NPR   | [185-187]                                                   |
| 3285 | Antithrombotic peptide                                               | antithrombotic    | 1 | PG    | [111-112]                                                   |
| 3356 | Stimulating vasoactive substance release                             | stimulating       | 1 | LLL   | [85-87]                                                     |
| 8320 | Glucose uptake stimulating peptide                                   | stimulating       | 2 | VL    | [108-109],[465-466]                                         |
| 8321 | Glucose uptake stimulating peptide                                   | stimulating       | 3 | LV    | [96-97],[466-467],[489-490]                                 |
| 8322 | Glucose uptake stimulating peptide                                   | stimulating       | 2 | IV    | [15-16],[267-268]                                           |
| 8323 | Glucose uptake stimulating peptide                                   | stimulating       | 2 | IL    | [5-6],[357-358]                                             |
| 8324 | Glucose uptake stimulating peptide                                   | stimulating       | 1 | LI    | [13-14]                                                     |
| 8325 | Glucose uptake stimulating peptide                                   | stimulating       | 2 | II    | [14-15],[148-149]                                           |
| 8326 | Glucose uptake stimulating peptide                                   | stimulating       | 5 | LL    | [6-7],[85-86],[86-87],[172-173],[417-418]                   |
| 8329 | Stimulating vasoactive substance release                             | stimulating       | 6 | EE    | [118-119],[285-286],[290-291],[319-320],[342-343],[463-464] |
| 8330 | Stimulating vasoactive substance release                             | stimulating       | 4 | SE    | [259-260],[301-302],[303-304],[499-500]                     |
| 3066 | Immunostimulating peptide                                            | immunostimulating | 1 | EAE   | [52-54]                                                     |
| 2890 | neuropeptide                                                         | neuropeptide      | 5 | GQ    | [35-36],[127-128],[203-204],[404-405],[415-416]             |
| 8310 | Anxiolytic peptide                                                   | neuropeptide      | 2 | YL    | [10-11],[190-191]                                           |
| 2754 | peptide regulating the stomach mucosal membrane activity             | regulating        | 1 | PG    | [111-112]                                                   |
| 3314 |                                                                      | antioxidative     | 1 | LLPH  | [86-89]                                                     |
| 7872 | peptide from soybean protein isolates: beta-conglycinin and glycinin | antioxidative     | 2 | LY    | [370-371],[375-376]                                         |
| 7873 | peptide from soybean protein isolates: beta-conglycinin and glycinin | antioxidative     | 2 | IY    | [9-10],[339-340]                                            |
| 7886 | peptide derived from egg white albumin                               | antioxidative     | 2 | AH    | [156-157],[384-385]                                         |
| 7888 | antioxidative peptide                                                | antioxidative     | 1 | EL    | [411-412]                                                   |
| 8037 | synthetic peptide                                                    | antioxidative     | 1 | PHW   | [378-380]                                                   |
| 8038 | synthetic peptide                                                    | antioxidative     | 1 | PHY   | [88-90]                                                     |
| 8057 | synthetic peptide                                                    | antioxidative     | 1 | RHF   | [141-143]                                                   |
| 8064 | synthetic peptide                                                    | antioxidative     | 1 | RHQ   | [136-138]                                                   |
| 8076 | synthetic peptide                                                    | antioxidative     | 1 | RWL   | [359-361]                                                   |
| 8214 | Antioxidative peptide                                                | antioxidative     | 2 | RW    | [281-282],[359-360]                                         |
| 8215 | Antioxidative peptide                                                | antioxidative     | 3 | IR    | [140-141],[278-279],[458-459]                               |
| 8217 | Antioxidative peptide                                                | antioxidative     | 1 | LK    | [480-481]                                                   |

|      |                                                      |                                           |   |       |                                                   |
|------|------------------------------------------------------|-------------------------------------------|---|-------|---------------------------------------------------|
| 8218 | Antioxidative peptide                                | antioxidative                             | 1 | KP    | [3-4]                                             |
| 8220 | antioxidative peptide                                | antioxidative                             | 1 | TFE   | [116-118]                                         |
| 8224 | antioxidative peptide                                | antioxidative                             | 2 | VY    | [97-98],[388-389]                                 |
| 9363 | Antioxidative peptide                                | antioxidative                             | 1 | NEN   | [443-445]                                         |
| 9716 | Antioxidative peptide                                | antioxidative                             | 1 | LPILR | [355-359]                                         |
| 8661 | Hypotensive peptide                                  | hypotensive                               | 1 | LPILR | [355-359]                                         |
| 4005 |                                                      | activating ubiquitin-mediated proteolysis | 5 | RA    | [336-337],[394-395],[429-430],[459-460],[502-503] |
| 4006 | Ubiquitin-mediated proteolysis activating peptide    | activating ubiquitin-mediated proteolysis | 4 | LA    | [23-24],[191-192],[243-244],[451-452]             |
| 9580 | Hypolipidemic peptide                                | hypolipidemic                             | 3 | EF    | [131-132],[198-199],[241-242]                     |
| 9650 | Alpha-glucosidase inhibitor                          | alpha-glucosidase inhibitor               | 3 | EA    | [52-53],[54-55],[343-344]                         |
| 9693 | Alpha-glucosidase inhibitor                          | alpha-glucosidase inhibitor               | 1 | VE    | [270-271]                                         |
| 9694 | Alpha-glucosidase inhibitor                          | alpha-glucosidase inhibitor               | 2 | PE    | [114-115],[462-463]                               |
| 9695 | Alpha-glucosidase inhibitor                          | alpha-glucosidase inhibitor               | 2 | AD    | [244-245],[337-338]                               |
| 3172 | dipeptidyl peptidase IV inhibitor (DPP IV inhibitor) | dipeptidyl peptidase IV inhibitor         | 4 | VA    | [16-17],[73-74],[155-156],[168-169]               |
| 3173 | dipeptidyl peptidase IV inhibitor (DPP IV inhibitor) | dipeptidyl peptidase IV inhibitor         | 1 | MA    | [1-2]                                             |
| 3175 | dipeptidyl peptidase IV inhibitor (DPP IV inhibitor) | dipeptidyl peptidase IV inhibitor         | 4 | LA    | [23-24],[191-192],[243-244],[451-452]             |
| 3176 | dipeptidyl peptidase IV inhibitor (DPP IV inhibitor) | dipeptidyl peptidase IV inhibitor         | 1 | FA    | [424-425]                                         |
| 3177 | dipeptidyl peptidase IV inhibitor (DPP IV inhibitor) | dipeptidyl peptidase IV inhibitor         | 1 | AP    | [93-94]                                           |
| 3179 | dipeptidyl peptidase IV inhibitor (DPP IV inhibitor) | dipeptidyl peptidase IV inhibitor         | 1 | PA    | [152-153]                                         |
| 3180 | dipeptidyl peptidase IV inhibitor (DPP IV inhibitor) | dipeptidyl peptidase IV inhibitor         | 3 | LP    | [87-88],[355-356],[461-462]                       |
| 3181 | dipeptidyl peptidase IV inhibitor (DPP IV inhibitor) | dipeptidyl peptidase IV inhibitor         | 1 | VP    | [377-378]                                         |
| 3182 | dipeptidyl peptidase IV inhibitor (DPP IV inhibitor) | dipeptidyl peptidase IV inhibitor         | 5 | LL    | [6-7],[85-86],[86-87],[172-173],[417-418]         |
| 3183 | dipeptidyl peptidase IV inhibitor (DPP IV inhibitor) | dipeptidyl peptidase IV inhibitor         | 5 | VV    | [75-76],[167-168],[387-388],[399-400],[426-427]   |
| 8501 | Dipeptidyl peptidase IV inhibitor (DPP IV inhibitor) | dipeptidyl peptidase IV inhibitor         | 2 | IP    | [420-421],[472-473]                               |
| 8505 | Dipeptidyl peptidase IV inhibitor (DPP IV inhibitor) | dipeptidyl peptidase IV inhibitor         | 2 | SP    | [165-166],[449-450]                               |
| 8506 | dipeptidyl peptidase IV inhibitor (DPP IV inhibitor) | dipeptidyl peptidase IV inhibitor         | 2 | FP    | [110-111],[151-152]                               |
| 8518 | dipeptidyl peptidase IV inhibitor (DPP IV inhibitor) | dipeptidyl peptidase IV inhibitor         | 2 | RP    | [200-201],[279-280]                               |
| 8519 | dipeptidyl peptidase IV inhibitor (DPP IV inhibitor) | dipeptidyl peptidase IV inhibitor         | 1 | KP    | [3-4]                                             |
| 8524 | dipeptidyl peptidase IV inhibitor (DPP IV inhibitor) | dipeptidyl peptidase IV inhibitor         | 1 | GA    | [368-369]                                         |
| 8525 | dipeptidyl peptidase IV inhibitor (DPP IV inhibitor) | dipeptidyl peptidase IV inhibitor         | 2 | IA    | [99-100],[149-150]                                |
| 8526 | dipeptidyl peptidase IV inhibitor (DPP IV inhibitor) | dipeptidyl peptidase IV inhibitor         | 5 | RA    | [336-337],[394-395],[429-430],[459-460],[502-503] |
| 8529 | dipeptidyl peptidase IV inhibitor (DPP IV inhibitor) | dipeptidyl peptidase IV inhibitor         | 2 | EP    | [46-47],[81-82]                                   |
| 8530 | dipeptidyl peptidase IV inhibitor (DPP IV inhibitor) | dipeptidyl peptidase IV inhibitor         | 2 | NP    | [185-186],[194-195]                               |
| 8531 | dipeptidyl peptidase IV inhibitor (DPP IV inhibitor) | dipeptidyl peptidase IV inhibitor         | 1 | TA    | [253-254]                                         |

|      |                                                      |                                   |   |    |                                                         |
|------|------------------------------------------------------|-----------------------------------|---|----|---------------------------------------------------------|
| 8555 | dipeptidyl peptidase IV inhibitor (DPP IV inhibitor) | dipeptidyl peptidase IV inhibitor | 2 | FL | [171-172],[242-243]                                     |
| 8556 | dipeptidyl peptidase IV inhibitor (DPP IV inhibitor) | dipeptidyl peptidase IV inhibitor | 1 | WV | [437-438]                                               |
| 8559 | dipeptidyl peptidase IV inhibitor (DPP IV inhibitor) | dipeptidyl peptidase IV inhibitor | 6 | AL | [17-18],[44-45],[369-370],[374-375],[390-391],[460-461] |
| 8560 | dipeptidyl peptidase IV inhibitor (DPP IV inhibitor) | dipeptidyl peptidase IV inhibitor | 1 | SL | [326-327]                                               |
| 8561 | dipeptidyl peptidase IV inhibitor (DPP IV inhibitor) | dipeptidyl peptidase IV inhibitor | 2 | GL | [84-85],[317-318]                                       |
| 8594 | dipeptidyl peptidase IV inhibitor (DPP IV inhibitor) | dipeptidyl peptidase IV inhibitor | 3 | VR | [76-77],[268-269],[490-491]                             |
| 8638 | dipeptidyl peptidase IV inhibitor (DPP IV inhibitor) | dipeptidyl peptidase IV inhibitor | 1 | PL | [450-451]                                               |
| 8677 | dipeptidyl peptidase IV inhibitor (DPP IV inhibitor) | dipeptidyl peptidase IV inhibitor | 1 | WL | [360-361]                                               |
| 8680 | dipeptidyl peptidase IV inhibitor (DPP IV inhibitor) | dipeptidyl peptidase IV inhibitor | 1 | WN | [380-381]                                               |
| 8684 | dipeptidyl peptidase IV inhibitor (DPP IV inhibitor) | dipeptidyl peptidase IV inhibitor | 1 | WC | [158-159]                                               |
| 8687 | dipeptidyl peptidase IV inhibitor (DPP IV inhibitor) | dipeptidyl peptidase IV inhibitor | 1 | WS | [282-283]                                               |
| 8696 | dipeptidyl peptidase IV inhibitor (DPP IV inhibitor) | dipeptidyl peptidase IV inhibitor | 1 | YT | [340-341]                                               |
| 8757 | dipeptidyl peptidase IV inhibitor (DPP IV inhibitor) | dipeptidyl peptidase IV inhibitor | 2 | AD | [244-245],[337-338]                                     |
| 8758 | dipeptidyl peptidase IV inhibitor (DPP IV inhibitor) | dipeptidyl peptidase IV inhibitor | 5 | AE | [53-54],[240-241],[365-366],[395-396],[503-504]         |
| 8759 | dipeptidyl peptidase IV inhibitor (DPP IV inhibitor) | dipeptidyl peptidase IV inhibitor | 3 | AF | [150-151],[246-247],[469-470]                           |
| 8760 | dipeptidyl peptidase IV inhibitor (DPP IV inhibitor) | dipeptidyl peptidase IV inhibitor | 6 | AG | [55-56],[71-72],[153-154],[192-193],[344-345],[452-453] |
| 8761 | dipeptidyl peptidase IV inhibitor (DPP IV inhibitor) | dipeptidyl peptidase IV inhibitor | 2 | AH | [156-157],[384-385]                                     |
| 8764 | dipeptidyl peptidase IV inhibitor (DPP IV inhibitor) | dipeptidyl peptidase IV inhibitor | 2 | AV | [74-75],[425-426]                                       |
| 8766 | dipeptidyl peptidase IV inhibitor (DPP IV inhibitor) | dipeptidyl peptidase IV inhibitor | 2 | DN | [315-316],[401-402]                                     |
| 8767 | dipeptidyl peptidase IV inhibitor (DPP IV inhibitor) | dipeptidyl peptidase IV inhibitor | 2 | DP | [62-63],[333-334]                                       |
| 8768 | dipeptidyl peptidase IV inhibitor (DPP IV inhibitor) | dipeptidyl peptidase IV inhibitor | 1 | DQ | [183-184]                                               |
| 8769 | dipeptidyl peptidase IV inhibitor (DPP IV inhibitor) | dipeptidyl peptidase IV inhibitor | 1 | DR | [135-136]                                               |
| 8770 | dipeptidyl peptidase IV inhibitor (DPP IV inhibitor) | dipeptidyl peptidase IV inhibitor | 4 | EG | [145-146],[271-272],[414-415],[433-434]                 |
| 8771 | dipeptidyl peptidase IV inhibitor (DPP IV inhibitor) | dipeptidyl peptidase IV inhibitor | 2 | EH | [222-223],[288-289]                                     |
| 8773 | dipeptidyl peptidase IV inhibitor (DPP IV inhibitor) | dipeptidyl peptidase IV inhibitor | 5 | ES | [59-60],[119-120],[300-301],[302-303],[486-487]         |
| 8774 | dipeptidyl peptidase IV inhibitor (DPP IV inhibitor) | dipeptidyl peptidase IV inhibitor | 3 | ET | [115-116],[252-253],[320-321]                           |
| 8775 | dipeptidyl peptidase IV inhibitor (DPP IV inhibitor) | dipeptidyl peptidase IV inhibitor | 3 | EV | [396-397],[464-465],[504-505]                           |
| 8776 | dipeptidyl peptidase IV inhibitor (DPP IV inhibitor) | dipeptidyl peptidase IV inhibitor | 1 | EW | [436-437]                                               |
| 8777 | dipeptidyl peptidase IV inhibitor (DPP IV inhibitor) | dipeptidyl peptidase IV inhibitor | 1 | EY | [206-207]                                               |
| 8778 | dipeptidyl peptidase IV inhibitor (DPP IV inhibitor) | dipeptidyl peptidase IV inhibitor | 3 | FN | [19-20],[247-248],[482-483]                             |
| 8779 | dipeptidyl peptidase IV inhibitor (DPP IV inhibitor) | dipeptidyl peptidase IV inhibitor | 2 | FQ | [132-133],[470-471]                                     |
| 8780 | dipeptidyl peptidase IV inhibitor (DPP IV inhibitor) | dipeptidyl peptidase IV inhibitor | 2 | FR | [143-144],[199-200]                                     |
| 8781 | dipeptidyl peptidase IV inhibitor (DPP IV inhibitor) | dipeptidyl peptidase IV inhibitor | 2 | GE | [221-222],[224-225]                                     |
| 8782 | dipeptidyl peptidase IV inhibitor (DPP IV inhibitor) | dipeptidyl peptidase IV inhibitor | 2 | GF | [237-238],[434-435]                                     |
| 8783 | dipeptidyl peptidase IV inhibitor (DPP IV inhibitor) | dipeptidyl peptidase IV inhibitor | 2 | GG | [27-28],[311-312]                                       |
| 8785 | dipeptidyl peptidase IV inhibitor (DPP IV inhibitor) | dipeptidyl peptidase IV inhibitor | 1 | GI | [104-105]                                               |

|      |                                                      |                                   |   |    |                                                 |
|------|------------------------------------------------------|-----------------------------------|---|----|-------------------------------------------------|
| 8786 | dipeptidyl peptidase IV inhibitor (DPP IV inhibitor) | dipeptidyl peptidase IV inhibitor | 4 | GV | [56-57],[72-73],[107-108],[154-155]             |
| 8790 | dipeptidyl peptidase IV inhibitor (DPP IV inhibitor) | dipeptidyl peptidase IV inhibitor | 1 | HE | [289-290]                                       |
| 8791 | dipeptidyl peptidase IV inhibitor (DPP IV inhibitor) | dipeptidyl peptidase IV inhibitor | 1 | HF | [142-143]                                       |
| 8794 | dipeptidyl peptidase IV inhibitor (DPP IV inhibitor) | dipeptidyl peptidase IV inhibitor | 2 | HR | [210-211],[263-264]                             |
| 8795 | dipeptidyl peptidase IV inhibitor (DPP IV inhibitor) | dipeptidyl peptidase IV inhibitor | 1 | HS | [385-386]                                       |
| 8798 | dipeptidyl peptidase IV inhibitor (DPP IV inhibitor) | dipeptidyl peptidase IV inhibitor | 2 | HW | [157-158],[379-380]                             |
| 8799 | dipeptidyl peptidase IV inhibitor (DPP IV inhibitor) | dipeptidyl peptidase IV inhibitor | 1 | HY | [89-90]                                         |
| 8801 | dipeptidyl peptidase IV inhibitor (DPP IV inhibitor) | dipeptidyl peptidase IV inhibitor | 2 | II | [14-15],[148-149]                               |
| 8802 | dipeptidyl peptidase IV inhibitor (DPP IV inhibitor) | dipeptidyl peptidase IV inhibitor | 2 | IL | [5-6],[357-358]                                 |
| 8806 | dipeptidyl peptidase IV inhibitor (DPP IV inhibitor) | dipeptidyl peptidase IV inhibitor | 3 | IR | [140-141],[278-279],[458-459]                   |
| 8808 | dipeptidyl peptidase IV inhibitor (DPP IV inhibitor) | dipeptidyl peptidase IV inhibitor | 1 | KE | [293-294]                                       |
| 8809 | dipeptidyl peptidase IV inhibitor (DPP IV inhibitor) | dipeptidyl peptidase IV inhibitor | 2 | KF | [33-34],[481-482]                               |
| 8812 | dipeptidyl peptidase IV inhibitor (DPP IV inhibitor) | dipeptidyl peptidase IV inhibitor | 1 | KI | [139-140]                                       |
| 8814 | dipeptidyl peptidase IV inhibitor (DPP IV inhibitor) | dipeptidyl peptidase IV inhibitor | 1 | KR | [428-429]                                       |
| 8816 | dipeptidyl peptidase IV inhibitor (DPP IV inhibitor) | dipeptidyl peptidase IV inhibitor | 1 | KT | [441-442]                                       |
| 8821 | dipeptidyl peptidase IV inhibitor (DPP IV inhibitor) | dipeptidyl peptidase IV inhibitor | 1 | LI | [13-14]                                         |
| 8823 | dipeptidyl peptidase IV inhibitor (DPP IV inhibitor) | dipeptidyl peptidase IV inhibitor | 2 | LN | [39-40],[382-383]                               |
| 8824 | dipeptidyl peptidase IV inhibitor (DPP IV inhibitor) | dipeptidyl peptidase IV inhibitor | 1 | LT | [418-419]                                       |
| 8825 | dipeptidyl peptidase IV inhibitor (DPP IV inhibitor) | dipeptidyl peptidase IV inhibitor | 3 | LV | [96-97],[466-467],[489-490]                     |
| 8837 | dipeptidyl peptidase IV inhibitor (DPP IV inhibitor) | dipeptidyl peptidase IV inhibitor | 1 | MV | [447-448]                                       |
| 8839 | dipeptidyl peptidase IV inhibitor (DPP IV inhibitor) | dipeptidyl peptidase IV inhibitor | 5 | NA | [92-93],[178-179],[383-384],[445-446],[468-469] |
| 8840 | dipeptidyl peptidase IV inhibitor (DPP IV inhibitor) | dipeptidyl peptidase IV inhibitor | 2 | ND | [161-162],[261-262]                             |
| 8841 | dipeptidyl peptidase IV inhibitor (DPP IV inhibitor) | dipeptidyl peptidase IV inhibitor | 1 | NE | [443-444]                                       |
| 8842 | dipeptidyl peptidase IV inhibitor (DPP IV inhibitor) | dipeptidyl peptidase IV inhibitor | 3 | NF | [188-189],[402-403],[423-424]                   |
| 8843 | dipeptidyl peptidase IV inhibitor (DPP IV inhibitor) | dipeptidyl peptidase IV inhibitor | 3 | NG | [20-21],[83-84],[316-317]                       |
| 8844 | dipeptidyl peptidase IV inhibitor (DPP IV inhibitor) | dipeptidyl peptidase IV inhibitor | 1 | NH | [64-65]                                         |
| 8845 | dipeptidyl peptidase IV inhibitor (DPP IV inhibitor) | dipeptidyl peptidase IV inhibitor | 2 | NL | [354-355],[381-382]                             |
| 8847 | dipeptidyl peptidase IV inhibitor (DPP IV inhibitor) | dipeptidyl peptidase IV inhibitor | 2 | NN | [177-178],[232-233]                             |
| 8848 | dipeptidyl peptidase IV inhibitor (DPP IV inhibitor) | dipeptidyl peptidase IV inhibitor | 1 | NQ | [180-181]                                       |
| 8849 | dipeptidyl peptidase IV inhibitor (DPP IV inhibitor) | dipeptidyl peptidase IV inhibitor | 3 | NR | [40-41],[49-50],[483-484]                       |
| 8851 | dipeptidyl peptidase IV inhibitor (DPP IV inhibitor) | dipeptidyl peptidase IV inhibitor | 2 | NV | [233-234],[248-249]                             |
| 8855 | dipeptidyl peptidase IV inhibitor (DPP IV inhibitor) | dipeptidyl peptidase IV inhibitor | 1 | PG | [111-112]                                       |
| 8856 | dipeptidyl peptidase IV inhibitor (DPP IV inhibitor) | dipeptidyl peptidase IV inhibitor | 2 | PH | [88-89],[378-379]                               |
| 8857 | dipeptidyl peptidase IV inhibitor (DPP IV inhibitor) | dipeptidyl peptidase IV inhibitor | 2 | PI | [4-5],[356-357]                                 |
| 8860 | dipeptidyl peptidase IV inhibitor (DPP IV inhibitor) | dipeptidyl peptidase IV inhibitor | 2 | PN | [63-64],[82-83]                                 |
| 8861 | dipeptidyl peptidase IV inhibitor (DPP IV inhibitor) | dipeptidyl peptidase IV inhibitor | 3 | PQ | [94-95],[201-202],[421-422]                     |

|      |                                                      |                                   |   |    |                                                                                         |
|------|------------------------------------------------------|-----------------------------------|---|----|-----------------------------------------------------------------------------------------|
| 8862 | dipeptidyl peptidase IV inhibitor (DPP IV inhibitor) | dipeptidyl peptidase IV inhibitor | 1 | PS | [334-335]                                                                               |
| 8863 | dipeptidyl peptidase IV inhibitor (DPP IV inhibitor) | dipeptidyl peptidase IV inhibitor | 1 | PT | [47-48]                                                                                 |
| 8864 | dipeptidyl peptidase IV inhibitor (DPP IV inhibitor) | dipeptidyl peptidase IV inhibitor | 1 | PV | [166-167]                                                                               |
| 8868 | dipeptidyl peptidase IV inhibitor (DPP IV inhibitor) | dipeptidyl peptidase IV inhibitor | 1 | QD | [134-135]                                                                               |
| 8869 | dipeptidyl peptidase IV inhibitor (DPP IV inhibitor) | dipeptidyl peptidase IV inhibitor | 3 | QE | [205-206],[287-288],[485-486]                                                           |
| 8871 | dipeptidyl peptidase IV inhibitor (DPP IV inhibitor) | dipeptidyl peptidase IV inhibitor | 2 | QG | [126-127],[202-203]                                                                     |
| 8872 | dipeptidyl peptidase IV inhibitor (DPP IV inhibitor) | dipeptidyl peptidase IV inhibitor | 3 | QH | [31-32],[209-210],[215-216]                                                             |
| 8873 | dipeptidyl peptidase IV inhibitor (DPP IV inhibitor) | dipeptidyl peptidase IV inhibitor | 1 | QI | [471-472]                                                                               |
| 8874 | dipeptidyl peptidase IV inhibitor (DPP IV inhibitor) | dipeptidyl peptidase IV inhibitor | 7 | QL | [38-39],[67-68],[95-96],[181-182],[274-275],[362-363],[416-417]                         |
| 8875 | dipeptidyl peptidase IV inhibitor (DPP IV inhibitor) | dipeptidyl peptidase IV inhibitor | 2 | QN | [184-185],[422-423]                                                                     |
| 8876 | dipeptidyl peptidase IV inhibitor (DPP IV inhibitor) | dipeptidyl peptidase IV inhibitor | 9 | QQ | [30-31],[66-67],[125-126],[133-134],[204-205],[213-214],[214-215],[217-218],[226-227]   |
| 8877 | dipeptidyl peptidase IV inhibitor (DPP IV inhibitor) | dipeptidyl peptidase IV inhibitor | 4 | QS | [25-26],[123-124],[258-259],[307-308]                                                   |
| 8878 | dipeptidyl peptidase IV inhibitor (DPP IV inhibitor) | dipeptidyl peptidase IV inhibitor | 1 | QT | [405-406]                                                                               |
| 8879 | dipeptidyl peptidase IV inhibitor (DPP IV inhibitor) | dipeptidyl peptidase IV inhibitor | 2 | QV | [276-277],[398-399]                                                                     |
| 8882 | dipeptidyl peptidase IV inhibitor (DPP IV inhibitor) | dipeptidyl peptidase IV inhibitor | 7 | RG | [101-102],[103-104],[220-221],[264-265],[310-311],[367-368],[392-393]                   |
| 8883 | dipeptidyl peptidase IV inhibitor (DPP IV inhibitor) | dipeptidyl peptidase IV inhibitor | 2 | RH | [136-137],[141-142]                                                                     |
| 8884 | dipeptidyl peptidase IV inhibitor (DPP IV inhibitor) | dipeptidyl peptidase IV inhibitor | 2 | RI | [50-51],[346-347]                                                                       |
| 8885 | dipeptidyl peptidase IV inhibitor (DPP IV inhibitor) | dipeptidyl peptidase IV inhibitor | 1 | RK | [292-293]                                                                               |
| 8886 | dipeptidyl peptidase IV inhibitor (DPP IV inhibitor) | dipeptidyl peptidase IV inhibitor | 3 | RL | [41-42],[256-257],[479-480]                                                             |
| 8888 | dipeptidyl peptidase IV inhibitor (DPP IV inhibitor) | dipeptidyl peptidase IV inhibitor | 1 | RN | [187-188]                                                                               |
| 8889 | dipeptidyl peptidase IV inhibitor (DPP IV inhibitor) | dipeptidyl peptidase IV inhibitor | 9 | RR | [77-78],[129-130],[211-212],[219-220],[255-256],[305-306],[309-310],[478-479],[501-502] |
| 8890 | dipeptidyl peptidase IV inhibitor (DPP IV inhibitor) | dipeptidyl peptidase IV inhibitor | 2 | RW | [281-282],[359-360]                                                                     |
| 8891 | dipeptidyl peptidase IV inhibitor (DPP IV inhibitor) | dipeptidyl peptidase IV inhibitor | 1 | SF | [439-440]                                                                               |
| 8892 | dipeptidyl peptidase IV inhibitor (DPP IV inhibitor) | dipeptidyl peptidase IV inhibitor | 1 | SH | [352-353]                                                                               |
| 8893 | dipeptidyl peptidase IV inhibitor (DPP IV inhibitor) | dipeptidyl peptidase IV inhibitor | 2 | SI | [8-9],[266-267]                                                                         |
| 8895 | dipeptidyl peptidase IV inhibitor (DPP IV inhibitor) | dipeptidyl peptidase IV inhibitor | 1 | SV | [386-387]                                                                               |
| 8896 | dipeptidyl peptidase IV inhibitor (DPP IV inhibitor) | dipeptidyl peptidase IV inhibitor | 1 | SW | [60-61]                                                                                 |
| 8899 | dipeptidyl peptidase IV inhibitor (DPP IV inhibitor) | dipeptidyl peptidase IV inhibitor | 2 | TE | [251-252],[341-342]                                                                     |
| 8900 | dipeptidyl peptidase IV inhibitor (DPP IV inhibitor) | dipeptidyl peptidase IV inhibitor | 1 | TF | [116-117]                                                                               |
| 8901 | dipeptidyl peptidase IV inhibitor (DPP IV inhibitor) | dipeptidyl peptidase IV inhibitor | 1 | TG | [106-107]                                                                               |
| 8902 | dipeptidyl peptidase IV inhibitor (DPP IV inhibitor) | dipeptidyl peptidase IV inhibitor | 1 | TH | [175-176]                                                                               |
| 8903 | dipeptidyl peptidase IV inhibitor (DPP IV inhibitor) | dipeptidyl peptidase IV inhibitor | 3 | TI | [79-80],[321-322],[419-420]                                                             |
| 8905 | dipeptidyl peptidase IV inhibitor (DPP IV inhibitor) | dipeptidyl peptidase IV inhibitor | 2 | TL | [324-325],[488-489]                                                                     |
| 8907 | dipeptidyl peptidase IV inhibitor (DPP IV inhibitor) | dipeptidyl peptidase IV inhibitor | 2 | TN | [48-49],[442-443]                                                                       |

|      |                                                      |                                    |   |    |                                                                                         |
|------|------------------------------------------------------|------------------------------------|---|----|-----------------------------------------------------------------------------------------|
| 8910 | dipeptidyl peptidase IV inhibitor (DPP IV inhibitor) | dipeptidyl peptidase IV inhibitor  | 1 | TS | [455-456]                                                                               |
| 8912 | dipeptidyl peptidase IV inhibitor (DPP IV inhibitor) | dipeptidyl peptidase IV inhibitor  | 2 | TV | [349-350],[406-407]                                                                     |
| 8915 | dipeptidyl peptidase IV inhibitor (DPP IV inhibitor) | dipeptidyl peptidase IV inhibitor  | 2 | VD | [249-250],[400-401]                                                                     |
| 8916 | dipeptidyl peptidase IV inhibitor (DPP IV inhibitor) | dipeptidyl peptidase IV inhibitor  | 1 | VE | [270-271]                                                                               |
| 8917 | dipeptidyl peptidase IV inhibitor (DPP IV inhibitor) | dipeptidyl peptidase IV inhibitor  | 2 | VF | [234-235],[407-408]                                                                     |
| 8920 | dipeptidyl peptidase IV inhibitor (DPP IV inhibitor) | dipeptidyl peptidase IV inhibitor  | 2 | VI | [57-58],[277-278]                                                                       |
| 8921 | dipeptidyl peptidase IV inhibitor (DPP IV inhibitor) | dipeptidyl peptidase IV inhibitor  | 1 | VK | [427-428]                                                                               |
| 8922 | dipeptidyl peptidase IV inhibitor (DPP IV inhibitor) | dipeptidyl peptidase IV inhibitor  | 2 | VL | [108-109],[465-466]                                                                     |
| 8924 | dipeptidyl peptidase IV inhibitor (DPP IV inhibitor) | dipeptidyl peptidase IV inhibitor  | 2 | VN | [350-351],[467-468]                                                                     |
| 8925 | dipeptidyl peptidase IV inhibitor (DPP IV inhibitor) | dipeptidyl peptidase IV inhibitor  | 1 | VQ | [397-398]                                                                               |
| 8926 | dipeptidyl peptidase IV inhibitor (DPP IV inhibitor) | dipeptidyl peptidase IV inhibitor  | 2 | VS | [438-439],[448-449]                                                                     |
| 8929 | dipeptidyl peptidase IV inhibitor (DPP IV inhibitor) | dipeptidyl peptidase IV inhibitor  | 2 | VY | [97-98],[388-389]                                                                       |
| 8930 | dipeptidyl peptidase IV inhibitor (DPP IV inhibitor) | dipeptidyl peptidase IV inhibitor  | 1 | WD | [61-62]                                                                                 |
| 8932 | dipeptidyl peptidase IV inhibitor (DPP IV inhibitor) | dipeptidyl peptidase IV inhibitor  | 1 | YA | [389-390]                                                                               |
| 8934 | dipeptidyl peptidase IV inhibitor (DPP IV inhibitor) | dipeptidyl peptidase IV inhibitor  | 1 | YE | [207-208]                                                                               |
| 8938 | dipeptidyl peptidase IV inhibitor (DPP IV inhibitor) | dipeptidyl peptidase IV inhibitor  | 1 | YI | [98-99]                                                                                 |
| 8940 | dipeptidyl peptidase IV inhibitor (DPP IV inhibitor) | dipeptidyl peptidase IV inhibitor  | 2 | YL | [10-11],[190-191]                                                                       |
| 8942 | dipeptidyl peptidase IV inhibitor (DPP IV inhibitor) | dipeptidyl peptidase IV inhibitor  | 1 | YN | [160-161]                                                                               |
| 8945 | dipeptidyl peptidase IV inhibitor (DPP IV inhibitor) | dipeptidyl peptidase IV inhibitor  | 2 | YS | [90-91],[371-372]                                                                       |
| 8946 | dipeptidyl peptidase IV inhibitor (DPP IV inhibitor) | dipeptidyl peptidase IV inhibitor  | 1 | YV | [376-377]                                                                               |
| 9477 | DPP-III inhibitor                                    | dipeptidyl peptidase III inhibitor | 2 | RW | [281-282],[359-360]                                                                     |
| 9478 | DPP-III inhibitor                                    | dipeptidyl peptidase III inhibitor | 4 | LR | [327-328],[358-359],[391-392],[412-413]                                                 |
| 9482 | DPP-III inhibitor                                    | dipeptidyl peptidase III inhibitor | 2 | YL | [10-11],[190-191]                                                                       |
| 9485 | DPP-III inhibitor                                    | dipeptidyl peptidase III inhibitor | 9 | RR | [77-78],[129-130],[211-212],[219-220],[255-256],[305-306],[309-310],[478-479],[501-502] |
| 9486 | DPP-III inhibitor                                    | dipeptidyl peptidase III inhibitor | 1 | TF | [116-117]                                                                               |
| 9487 | DPP-III inhibitor                                    | dipeptidyl peptidase III inhibitor | 2 | GE | [221-222],[224-225]                                                                     |
| 9488 | DPP-III inhibitor                                    | dipeptidyl peptidase III inhibitor | 2 | GF | [237-238],[434-435]                                                                     |
| 9489 | DPP-III inhibitor                                    | dipeptidyl peptidase III inhibitor | 3 | PR | [186-187],[280-281],[473-474]                                                           |
| 9491 | DPP-III inhibitor                                    | dipeptidyl peptidase III inhibitor | 1 | RV | [269-270]                                                                               |
| 9492 | DPP-III inhibitor                                    | dipeptidyl peptidase III inhibitor | 5 | DA | [43-44],[239-240],[245-246],[373-374],[476-477]                                         |
| 9494 | DPP-III inhibitor                                    | dipeptidyl peptidase III inhibitor | 1 | HK | [32-33]                                                                                 |
| 9495 | DPP-III inhibitor                                    | dipeptidyl peptidase III inhibitor | 1 | HF | [142-143]                                                                               |
| 9499 | DPP-III inhibitor                                    | dipeptidyl peptidase III inhibitor | 4 | LA | [23-24],[191-192],[243-244],[451-452]                                                   |
| 9500 | DPP-III inhibitor                                    | dipeptidyl peptidase III inhibitor | 1 | FA | [424-425]                                                                               |
| 9501 | DPP-III inhibitor                                    | dipeptidyl peptidase III inhibitor | 2 | FR | [143-144],[199-200]                                                                     |



|      |                   |                                    |   |      |                                         |
|------|-------------------|------------------------------------|---|------|-----------------------------------------|
| 9502 | DPP-III inhibitor | dipeptidyl peptidase III inhibitor | 2 | FL   | [171-172],[242-243]                     |
| 9504 | DPP-III inhibitor | dipeptidyl peptidase III inhibitor | 2 | PE   | [114-115],[462-463]                     |
| 9509 | DPP-III inhibitor | dipeptidyl peptidase III inhibitor | 2 | VY   | [97-98],[388-389]                       |
| 9510 | DPP-III inhibitor | dipeptidyl peptidase III inhibitor | 1 | YI   | [98-99]                                 |
| 8247 | CaMPDE inhibitor  | CaMPDE inhibitor                   | 3 | IR   | [140-141],[278-279],[458-459]           |
| 8249 | CaMPDE inhibitor  | CaMPDE inhibitor                   | 2 | KF   | [33-34],[481-482]                       |
| 8250 | CaMPDE inhibitor  | CaMPDE inhibitor                   | 3 | EF   | [131-132],[198-199],[241-242]           |
| 2842 | Renin inhibitor   | renin inhibitor                    | 4 | LR   | [327-328],[358-359],[391-392],[412-413] |
| 8246 | renin inhibitor   | renin inhibitor                    | 3 | IR   | [140-141],[278-279],[458-459]           |
| 8248 | Renin inhibitor   | renin inhibitor                    | 2 | KF   | [33-34],[481-482]                       |
| 8251 | Renin inhibitor   | renin inhibitor                    | 3 | EF   | [131-132],[198-199],[241-242]           |
| 9430 | Renin inhibitor   | renin inhibitor                    | 3 | NR   | [40-41],[49-50],[483-484]               |
| 9432 | Renin inhibitor   | renin inhibitor                    | 1 | SF   | [439-440]                               |
| 9433 | Renin inhibitor   | renin inhibitor                    | 1 | YA   | [389-390]                               |
| 9469 | Renin inhibitor   | renin inhibitor                    | 1 | RALP | [459-462]                               |
| 9470 | Renin inhibitor   | renin inhibitor                    | 2 | LY   | [370-371],[375-376]                     |
| 9471 | Renin inhibitor   | renin inhibitor                    | 1 | TF   | [116-117]                               |

Table S13. Profile of potential biological activity of fragments of protein Jug r 1.0101.

| ID   | Name of peptide                             | Activity      | Number | Sequence | Location                          |
|------|---------------------------------------------|---------------|--------|----------|-----------------------------------|
| 3258 | beta-lactokinin                             | ACE inhibitor | 1      | IR       | [134-135]                         |
| 3515 | ACE inhibitor                               | ACE inhibitor | 1      | GGY      | [63-65]                           |
| 3532 | ACE inhibitor                               | ACE inhibitor | 1      | GY       | [64-65]                           |
| 3537 | ACE inhibitor                               | ACE inhibitor | 1      | PR       | [32-33]                           |
| 3551 | ACE inhibitor (from bovine beta-Lg)         | ACE inhibitor | 1      | LF       | [8-9]                             |
| 7542 | ACE inhibitor                               | ACE inhibitor | 1      | DLP      | [120-122]                         |
| 7583 | ACE inhibitor                               | ACE inhibitor | 1      | AF       | [15-16]                           |
| 7590 | ACE inhibitor                               | ACE inhibitor | 3      | AA       | [1-2],[13-14],[14-15]             |
| 7592 | ACE inhibitor                               | ACE inhibitor | 2      | FR       | [16-17],[74-75]                   |
| 7596 | ACE inhibitor                               | ACE inhibitor | 1      | GI       | [126-127]                         |
| 7599 | ACE inhibitor                               | ACE inhibitor | 2      | GL       | [92-93],[105-106]                 |
| 7615 | ACE inhibitor                               | ACE inhibitor | 2      | GE       | [36-37],[108-109]                 |
| 7616 | ACE inhibitor                               | ACE inhibitor | 1      | GG       | [63-64]                           |
| 7617 | ACE inhibitor                               | ACE inhibitor | 1      | QG       | [104-105]                         |
| 7618 | ACE inhibitor                               | ACE inhibitor | 1      | SG       | [62-63]                           |
| 7622 | ACE inhibitor                               | ACE inhibitor | 2      | EG       | [37-38],[91-92]                   |
| 7628 | ACE inhibitor from k-CN (fr. 67-68)         | ACE inhibitor | 1      | VR       | [97-98]                           |
| 7644 | ACE inhibitor from porcine myosin (306-308) | ACE inhibitor | 1      | ITT      | [20-22]                           |
| 7741 | ACE inhibitor                               | ACE inhibitor | 4      | RR       | [33-34],[34-35],[98-99],[135-136] |
| 7742 | ACE inhibitor                               | ACE inhibitor | 1      | AR       | [118-119]                         |
| 7807 | ACE inhibitor from caprine b-Lg             | ACE inhibitor | 1      | LLF      | [7-9]                             |
| 7826 | ACE inhibitor                               | ACE inhibitor | 2      | EI       | [24-25],[133-134]                 |
| 7832 | ACE inhibitor                               | ACE inhibitor | 1      | LN       | [49-50]                           |
| 7839 | ACE inhibitor                               | ACE inhibitor | 2      | ME       | [23-24],[111-112]                 |
| 9173 | ACE inhibitor                               | ACE inhibitor | 2      | RG       | [35-36],[107-108]                 |
| 9213 | ACE inhibitor                               | ACE inhibitor | 3      | LR       | [56-57],[93-94],[106-107]         |
| 9309 | ACE inhibitor                               | ACE inhibitor | 1      | RRR      | [33-35]                           |
| 9729 | ACE inhibitor                               | ACE inhibitor | 1      | VVR      | [96-98]                           |
| 9730 | ACE inhibitor                               | ACE inhibitor | 1      | NPR      | [31-33]                           |
| 8321 | Glucose uptake stimulating peptide          | stimulating   | 1      | LV       | [4-5]                             |
| 8326 | Glucose uptake stimulating peptide          | stimulating   | 2      | LL       | [3-4],[7-8]                       |
| 8329 | Stimulating vasoactive substance release    | stimulating   | 2      | EE       | [109-110],[112-113]               |
| 8310 | Anxiolytic peptide                          | neuropeptide  | 1      | YL       | [55-56]                           |

|      |                                                      |                                   |   |     |                       |
|------|------------------------------------------------------|-----------------------------------|---|-----|-----------------------|
| 7941 | synthetic peptide                                    | antioxidative                     | 1 | YYL | [54-56]               |
| 7966 | synthetic peptide                                    | antioxidative                     | 1 | QYY | [53-55]               |
| 8215 | Antioxidative peptide                                | antioxidative                     | 1 | IR  | [134-135]             |
| 9357 | Antioxidative peptide                                | antioxidative                     | 1 | CQC | [88-90]               |
| 9368 | Antioxidative peptide                                | antioxidative                     | 1 | EQC | [86-88]               |
| 3172 | dipeptidyl peptidase IV inhibitor (DPP IV inhibitor) | dipeptidyl peptidase IV inhibitor | 2 | VA  | [5-6],[10-11]         |
| 3180 | dipeptidyl peptidase IV inhibitor (DPP IV inhibitor) | dipeptidyl peptidase IV inhibitor | 1 | LP  | [121-122]             |
| 3182 | dipeptidyl peptidase IV inhibitor (DPP IV inhibitor) | dipeptidyl peptidase IV inhibitor | 2 | LL  | [3-4],[7-8]           |
| 3183 | dipeptidyl peptidase IV inhibitor (DPP IV inhibitor) | dipeptidyl peptidase IV inhibitor | 1 | VV  | [96-97]               |
| 8530 | dipeptidyl peptidase IV inhibitor (DPP IV inhibitor) | dipeptidyl peptidase IV inhibitor | 1 | NP  | [31-32]               |
| 8559 | dipeptidyl peptidase IV inhibitor (DPP IV inhibitor) | dipeptidyl peptidase IV inhibitor | 2 | AL  | [2-3],[6-7]           |
| 8561 | dipeptidyl peptidase IV inhibitor (DPP IV inhibitor) | dipeptidyl peptidase IV inhibitor | 2 | GL  | [92-93],[105-106]     |
| 8594 | dipeptidyl peptidase IV inhibitor (DPP IV inhibitor) | dipeptidyl peptidase IV inhibitor | 1 | VR  | [97-98]               |
| 8637 | dipeptidyl peptidase IV inhibitor (DPP IV inhibitor) | dipeptidyl peptidase IV inhibitor | 3 | AA  | [1-2],[13-14],[14-15] |
| 8692 | dipeptidyl peptidase IV inhibitor (DPP IV inhibitor) | dipeptidyl peptidase IV inhibitor | 1 | WF  | [138-139]             |
| 8759 | dipeptidyl peptidase IV inhibitor (DPP IV inhibitor) | dipeptidyl peptidase IV inhibitor | 1 | AF  | [15-16]               |
| 8766 | dipeptidyl peptidase IV inhibitor (DPP IV inhibitor) | dipeptidyl peptidase IV inhibitor | 2 | DN  | [30-31],[68-69]       |
| 8770 | dipeptidyl peptidase IV inhibitor (DPP IV inhibitor) | dipeptidyl peptidase IV inhibitor | 2 | EG  | [37-38],[91-92]       |
| 8772 | dipeptidyl peptidase IV inhibitor (DPP IV inhibitor) | dipeptidyl peptidase IV inhibitor | 2 | EI  | [24-25],[133-134]     |
| 8780 | dipeptidyl peptidase IV inhibitor (DPP IV inhibitor) | dipeptidyl peptidase IV inhibitor | 2 | FR  | [16-17],[74-75]       |
| 8781 | dipeptidyl peptidase IV inhibitor (DPP IV inhibitor) | dipeptidyl peptidase IV inhibitor | 2 | GE  | [36-37],[108-109]     |
| 8783 | dipeptidyl peptidase IV inhibitor (DPP IV inhibitor) | dipeptidyl peptidase IV inhibitor | 1 | GG  | [63-64]               |
| 8785 | dipeptidyl peptidase IV inhibitor (DPP IV inhibitor) | dipeptidyl peptidase IV inhibitor | 1 | GI  | [126-127]             |
| 8788 | dipeptidyl peptidase IV inhibitor (DPP IV inhibitor) | dipeptidyl peptidase IV inhibitor | 1 | GY  | [64-65]               |
| 8791 | dipeptidyl peptidase IV inhibitor (DPP IV inhibitor) | dipeptidyl peptidase IV inhibitor | 1 | HF  | [73-74]               |
| 8805 | dipeptidyl peptidase IV inhibitor (DPP IV inhibitor) | dipeptidyl peptidase IV inhibitor | 1 | IQ  | [43-44]               |
| 8806 | dipeptidyl peptidase IV inhibitor (DPP IV inhibitor) | dipeptidyl peptidase IV inhibitor | 1 | IR  | [134-135]             |
| 8823 | dipeptidyl peptidase IV inhibitor (DPP IV inhibitor) | dipeptidyl peptidase IV inhibitor | 1 | LN  | [49-50]               |
| 8825 | dipeptidyl peptidase IV inhibitor (DPP IV inhibitor) | dipeptidyl peptidase IV inhibitor | 1 | LV  | [4-5]                 |
| 8826 | dipeptidyl peptidase IV inhibitor (DPP IV inhibitor) | dipeptidyl peptidase IV inhibitor | 2 | ME  | [23-24],[111-112]     |
| 8837 | dipeptidyl peptidase IV inhibitor (DPP IV inhibitor) | dipeptidyl peptidase IV inhibitor | 1 | MV  | [114-115]             |
| 8839 | dipeptidyl peptidase IV inhibitor (DPP IV inhibitor) | dipeptidyl peptidase IV inhibitor | 1 | NA  | [12-13]               |
| 8841 | dipeptidyl peptidase IV inhibitor (DPP IV inhibitor) | dipeptidyl peptidase IV inhibitor | 1 | NE  | [123-124]             |
| 8844 | dipeptidyl peptidase IV inhibitor (DPP IV inhibitor) | dipeptidyl peptidase IV inhibitor | 1 | NH  | [50-51]               |
| 8845 | dipeptidyl peptidase IV inhibitor (DPP IV inhibitor) | dipeptidyl peptidase IV inhibitor | 1 | NL  | [48-49]               |
| 8848 | dipeptidyl peptidase IV inhibitor (DPP IV inhibitor) | dipeptidyl peptidase IV inhibitor | 1 | NQ  | [69-70]               |

|      |                                                      |                                    |   |    |                                                                 |
|------|------------------------------------------------------|------------------------------------|---|----|-----------------------------------------------------------------|
| 8860 | dipeptidyl peptidase IV inhibitor (DPP IV inhibitor) | dipeptidyl peptidase IV inhibitor  | 1 | PN | [122-123]                                                       |
| 8871 | dipeptidyl peptidase IV inhibitor (DPP IV inhibitor) | dipeptidyl peptidase IV inhibitor  | 1 | QG | [104-105]                                                       |
| 8872 | dipeptidyl peptidase IV inhibitor (DPP IV inhibitor) | dipeptidyl peptidase IV inhibitor  | 1 | QH | [72-73]                                                         |
| 8873 | dipeptidyl peptidase IV inhibitor (DPP IV inhibitor) | dipeptidyl peptidase IV inhibitor  | 1 | QI | [42-43]                                                         |
| 8874 | dipeptidyl peptidase IV inhibitor (DPP IV inhibitor) | dipeptidyl peptidase IV inhibitor  | 1 | QL | [80-81]                                                         |
| 8875 | dipeptidyl peptidase IV inhibitor (DPP IV inhibitor) | dipeptidyl peptidase IV inhibitor  | 1 | QN | [47-48]                                                         |
| 8876 | dipeptidyl peptidase IV inhibitor (DPP IV inhibitor) | dipeptidyl peptidase IV inhibitor  | 7 | QQ | [46-47],[58-59],[79-80],[100-101],[101-102],[102-103],[103-104] |
| 8877 | dipeptidyl peptidase IV inhibitor (DPP IV inhibitor) | dipeptidyl peptidase IV inhibitor  | 2 | QS | [59-60],[116-117]                                               |
| 8879 | dipeptidyl peptidase IV inhibitor (DPP IV inhibitor) | dipeptidyl peptidase IV inhibitor  | 1 | QV | [95-96]                                                         |
| 8881 | dipeptidyl peptidase IV inhibitor (DPP IV inhibitor) | dipeptidyl peptidase IV inhibitor  | 1 | QY | [53-54]                                                         |
| 8882 | dipeptidyl peptidase IV inhibitor (DPP IV inhibitor) | dipeptidyl peptidase IV inhibitor  | 2 | RG | [35-36],[107-108]                                               |
| 8889 | dipeptidyl peptidase IV inhibitor (DPP IV inhibitor) | dipeptidyl peptidase IV inhibitor  | 4 | RR | [33-34],[34-35],[98-99],[135-136]                               |
| 8896 | dipeptidyl peptidase IV inhibitor (DPP IV inhibitor) | dipeptidyl peptidase IV inhibitor  | 1 | SW | [137-138]                                                       |
| 8903 | dipeptidyl peptidase IV inhibitor (DPP IV inhibitor) | dipeptidyl peptidase IV inhibitor  | 1 | TI | [19-20]                                                         |
| 8906 | dipeptidyl peptidase IV inhibitor (DPP IV inhibitor) | dipeptidyl peptidase IV inhibitor  | 1 | TM | [22-23]                                                         |
| 8911 | dipeptidyl peptidase IV inhibitor (DPP IV inhibitor) | dipeptidyl peptidase IV inhibitor  | 2 | TT | [18-19],[21-22]                                                 |
| 8925 | dipeptidyl peptidase IV inhibitor (DPP IV inhibitor) | dipeptidyl peptidase IV inhibitor  | 1 | VQ | [115-116]                                                       |
| 8933 | dipeptidyl peptidase IV inhibitor (DPP IV inhibitor) | dipeptidyl peptidase IV inhibitor  | 1 | YD | [65-66]                                                         |
| 8940 | dipeptidyl peptidase IV inhibitor (DPP IV inhibitor) | dipeptidyl peptidase IV inhibitor  | 1 | YL | [55-56]                                                         |
| 8948 | dipeptidyl peptidase IV inhibitor (DPP IV inhibitor) | dipeptidyl peptidase IV inhibitor  | 1 | YY | [54-55]                                                         |
| 9476 | DPP-III inhibitor                                    | dipeptidyl peptidase III inhibitor | 1 | YY | [54-55]                                                         |
| 9478 | DPP-III inhibitor                                    | dipeptidyl peptidase III inhibitor | 3 | LR | [56-57],[93-94],[106-107]                                       |
| 9482 | DPP-III inhibitor                                    | dipeptidyl peptidase III inhibitor | 1 | YL | [55-56]                                                         |
| 9485 | DPP-III inhibitor                                    | dipeptidyl peptidase III inhibitor | 4 | RR | [33-34],[34-35],[98-99],[135-136]                               |
| 9487 | DPP-III inhibitor                                    | dipeptidyl peptidase III inhibitor | 2 | GE | [36-37],[108-109]                                               |
| 9489 | DPP-III inhibitor                                    | dipeptidyl peptidase III inhibitor | 1 | PR | [32-33]                                                         |
| 9495 | DPP-III inhibitor                                    | dipeptidyl peptidase III inhibitor | 1 | HF | [73-74]                                                         |
| 9501 | DPP-III inhibitor                                    | dipeptidyl peptidase III inhibitor | 2 | FR | [16-17],[74-75]                                                 |
| 8247 | CaMPDE inhibitor                                     | CaMPDE inhibitor                   | 1 | IR | [134-135]                                                       |
| 2842 | Renin inhibitor                                      | renin inhibitor                    | 3 | LR | [56-57],[93-94],[106-107]                                       |
| 8246 | renin inhibitor                                      | renin inhibitor                    | 1 | IR | [134-135]                                                       |

Table S14. Profile of potential biological activity of fragments of protein Jug r 2.0101.

| ID   | Name of peptide                         | Activity      | Number | Sequence | Location                                              |
|------|-----------------------------------------|---------------|--------|----------|-------------------------------------------------------|
| 3460 | Prolyl endopeptidase inhibitor          | antiamnestic  | 1      | PG       | [302-303]                                             |
| 3461 | Prolyl endopeptidase inhibitor          | antiamnestic  | 2      | GP       | [160-161],[384-385]                                   |
| 3257 | beta-lactokinin                         | ACE inhibitor | 5      | RL       | [45-46],[289-290],[339-340],[487-488],[513-514]       |
| 3258 | beta-lactokinin                         | ACE inhibitor | 4      | IR       | [40-41],[189-190],[271-272],[355-356]                 |
| 3380 | ACE inhibitor                           | ACE inhibitor | 2      | RY       | [75-76],[451-452]                                     |
| 3384 | ACE inhibitor                           | ACE inhibitor | 1      | VF       | [323-324]                                             |
| 3489 | ACE inhibitor from sake lees            | ACE inhibitor | 3      | RF       | [205-206],[342-343],[480-481]                         |
| 3492 | ACE inhibitor from sake                 | ACE inhibitor | 2      | VY       | [279-280],[443-444]                                   |
| 3494 | ACE inhibitor from sake                 | ACE inhibitor | 1      | HY       | [434-435]                                             |
| 3507 | ACE inhibitor (beta-LG fr. 78-80)       | ACE inhibitor | 1      | IPA      | [496-498]                                             |
| 3518 | ACE inhibitor                           | ACE inhibitor | 1      | VAA      | [330-332]                                             |
| 3537 | ACE inhibitor                           | ACE inhibitor | 6      | PR       | [11-12],[14-15],[69-70],[165-166],[336-337],[551-552] |
| 3542 | ACE inhibitor                           | ACE inhibitor | 1      | LQP      | [296-298]                                             |
| 3547 | ACE inhibitor                           | ACE inhibitor | 1      | IRA      | [355-357]                                             |
| 7498 | ACE inhibitor from as2-CN               | ACE inhibitor | 1      | TVY      | [278-280]                                             |
| 7512 | ACE inhibitor from Alaskan pollack skin | ACE inhibitor | 2      | GP       | [160-161],[384-385]                                   |
| 7513 | ACE inhibitor from Alaskan pollack skin | ACE inhibitor | 1      | PL       | [583-584]                                             |
| 7558 | ACE inhibitor from buckwheat            | ACE inhibitor | 2      | VK       | [200-201],[293-294]                                   |
| 7559 | ACE inhibitor from buckwheat            | ACE inhibitor | 1      | PSY      | [393-395]                                             |
| 7562 | ACE inhibitor from soy hydrolysate      | ACE inhibitor | 1      | IA       | [502-503]                                             |
| 7581 | ACE inhibitor                           | ACE inhibitor | 1      | IP       | [496-497]                                             |
| 7582 | ACE inhibitor                           | ACE inhibitor | 1      | RP       | [375-376]                                             |
| 7583 | ACE inhibitor                           | ACE inhibitor | 1      | AF       | [591-592]                                             |
| 7585 | ACE inhibitor                           | ACE inhibitor | 3      | LA       | [488-489],[529-530],[584-585]                         |
| 7586 | ACE inhibitor                           | ACE inhibitor | 1      | KR       | [426-427]                                             |
| 7587 | ACE inhibitor                           | ACE inhibitor | 3      | VP       | [273-274],[432-433],[568-569]                         |
| 7588 | ACE inhibitor                           | ACE inhibitor | 3      | RA       | [249-250],[356-357],[363-364]                         |
| 7589 | ACE inhibitor                           | ACE inhibitor | 2      | YA       | [309-310],[422-423]                                   |
| 7590 | ACE inhibitor                           | ACE inhibitor | 2      | AA       | [310-311],[331-332]                                   |

|      |                                     |               |    |     |                                                                                                         |
|------|-------------------------------------|---------------|----|-----|---------------------------------------------------------------------------------------------------------|
| 7591 | ACE inhibitor                       | ACE inhibitor | 1  | GF  | [516-517]                                                                                               |
| 7592 | ACE inhibitor                       | ACE inhibitor | 1  | FR  | [305-306]                                                                                               |
| 7593 | ACE inhibitor                       | ACE inhibitor | 2  | IF  | [493-494],[558-559]                                                                                     |
| 7596 | ACE inhibitor                       | ACE inhibitor | 1  | GI  | [215-216]                                                                                               |
| 7598 | ACE inhibitor                       | ACE inhibitor | 3  | GA  | [276-277],[312-313],[428-429]                                                                           |
| 7600 | ACE inhibitor                       | ACE inhibitor | 5  | AG  | [275-276],[311-312],[372-373],[498-499],[530-531]                                                       |
| 7601 | ACE inhibitor                       | ACE inhibitor | 1  | GH  | [499-500]                                                                                               |
| 7603 | ACE inhibitor                       | ACE inhibitor | 11 | GR  | [2-3],[61-62],[113-114],[156-157],[171-172],[248-249],[378-379],[450-451],[468-469],[479-480],[579-580] |
| 7605 | ACE inhibitor                       | ACE inhibitor | 1  | FG  | [399-400]                                                                                               |
| 7606 | ACE inhibitor                       | ACE inhibitor | 2  | DA  | [225-226],[238-239]                                                                                     |
| 7608 | ACE inhibitor                       | ACE inhibitor | 1  | GV  | [352-353]                                                                                               |
| 7610 | ACE inhibitor                       | ACE inhibitor | 9  | GQ  | [29-30],[31-32],[89-90],[303-304],[373-374],[400-401],[466-467],[531-532],[577-578]                     |
| 7612 | ACE inhibitor                       | ACE inhibitor | 1  | GT  | [448-449]                                                                                               |
| 7613 | ACE inhibitor                       | ACE inhibitor | 1  | WG  | [377-378]                                                                                               |
| 7615 | ACE inhibitor                       | ACE inhibitor | 2  | GE  | [198-199],[521-522]                                                                                     |
| 7616 | ACE inhibitor                       | ACE inhibitor | 1  | GG  | [383-384]                                                                                               |
| 7617 | ACE inhibitor                       | ACE inhibitor | 5  | QG  | [28-29],[30-31],[155-156],[467-468],[578-579]                                                           |
| 7618 | ACE inhibitor                       | ACE inhibitor | 1  | SG  | [382-383]                                                                                               |
| 7619 | ACE inhibitor                       | ACE inhibitor | 1  | LG  | [515-516]                                                                                               |
| 7620 | ACE inhibitor                       | ACE inhibitor | 2  | GD  | [268-269],[491-492]                                                                                     |
| 7621 | ACE inhibitor                       | ACE inhibitor | 2  | TG  | [449-450],[478-479]                                                                                     |
| 7622 | ACE inhibitor                       | ACE inhibitor | 4  | EG  | [197-198],[351-352],[447-448],[465-466]                                                                 |
| 7623 | ACE inhibitor                       | ACE inhibitor | 3  | EA  | [162-163],[404-405],[542-543]                                                                           |
| 7624 | ACE inhibitor                       | ACE inhibitor | 1  | NG  | [520-521]                                                                                               |
| 7625 | ACE inhibitor                       | ACE inhibitor | 1  | PG  | [302-303]                                                                                               |
| 7635 | ACE inhibitor from k-CN (fr. 51-53) | ACE inhibitor | 1  | VAV | [242-244]                                                                                               |
| 7680 | ACE inhibitor from pea vicilin      | ACE inhibitor | 1  | QK  | [482-483]                                                                                               |
| 7682 | ACE inhibitor from garlic           | ACE inhibitor | 2  | NY  | [218-219],[421-422]                                                                                     |
| 7684 | ACE inhibitor from garlic           | ACE inhibitor | 4  | SY  | [319-320],[394-395],[463-464],[565-566]                                                                 |
| 7685 | ACE inhibitor from garlic           | ACE inhibitor | 2  | SF  | [262-263],[547-548]                                                                                     |
| 7691 | ACE inhibitor from wakame           | ACE inhibitor | 1  | KY  | [201-202]                                                                                               |

|      |                                           |               |    |     |                                                                                                             |
|------|-------------------------------------------|---------------|----|-----|-------------------------------------------------------------------------------------------------------------|
| 7693 | ACE inhibitor from wakame                 | ACE inhibitor | 2  | KL  | [294-295],[361-362]                                                                                         |
| 7697 | ACE inhibitor from wakame                 | ACE inhibitor | 1  | YK  | [151-152]                                                                                                   |
| 7741 | ACE inhibitor                             | ACE inhibitor | 12 | RR  | [26-27],[58-59],[59-60],[87-88],[96-97],[97-98],[102-103],[128-129],[166-167],[379-380],[469-470],[575-576] |
| 7742 | ACE inhibitor                             | ACE inhibitor | 2  | AR  | [486-487],[489-490]                                                                                         |
| 7743 | ACE inhibitor                             | ACE inhibitor | 1  | KA  | [438-439]                                                                                                   |
| 7752 | ACE inhibitor from shark meat hydrolysate | ACE inhibitor | 2  | EY  | [23-24],[307-308]                                                                                           |
| 7826 | ACE inhibitor                             | ACE inhibitor | 3  | EI  | [424-425],[554-555],[557-558]                                                                               |
| 7827 | ACE inhibitor                             | ACE inhibitor | 2  | IE  | [216-217],[555-556]                                                                                         |
| 7828 | ACE inhibitor                             | ACE inhibitor | 1  | EV  | [199-200]                                                                                                   |
| 7829 | ACE inhibitor                             | ACE inhibitor | 1  | VE  | [446-447]                                                                                                   |
| 7830 | ACE inhibitor                             | ACE inhibitor | 3  | TE  | [207-208],[210-211],[570-571]                                                                               |
| 7831 | ACE inhibitor                             | ACE inhibitor | 2  | LQ  | [296-297],[413-414]                                                                                         |
| 7832 | ACE inhibitor                             | ACE inhibitor | 1  | LN  | [333-334]                                                                                                   |
| 7833 | ACE inhibitor                             | ACE inhibitor | 1  | PT  | [569-570]                                                                                                   |
| 7837 | ACE inhibitor                             | ACE inhibitor | 1  | PQ  | [119-120]                                                                                                   |
| 7839 | ACE inhibitor                             | ACE inhibitor | 1  | ME  | [563-564]                                                                                                   |
| 7840 | ACE inhibitor                             | ACE inhibitor | 1  | EK  | [360-361]                                                                                                   |
| 7841 | ACE inhibitor                             | ACE inhibitor | 2  | KE  | [152-153],[544-545]                                                                                         |
| 7842 | ACE inhibitor                             | ACE inhibitor | 2  | HP  | [500-501],[582-583]                                                                                         |
| 7843 | ACE inhibitor                             | ACE inhibitor | 3  | PH  | [234-235],[433-434],[457-458]                                                                               |
| 7844 | ACE inhibitor                             | ACE inhibitor | 1  | HK  | [236-237]                                                                                                   |
| 8193 | ACE inhibitor                             | ACE inhibitor | 1  | AI  | [503-504]                                                                                                   |
| 8513 | ACE inhibitor from soya milk              | ACE inhibitor | 1  | FVP | [567-569]                                                                                                   |
| 8951 | ACE inhibitor                             | ACE inhibitor | 1  | AV  | [243-244]                                                                                                   |
| 9031 | ACE inhibitor                             | ACE inhibitor | 1  | LEE | [46-48]                                                                                                     |
| 9068 | ACE inhibitor                             | ACE inhibitor | 1  | VTR | [245-247]                                                                                                   |
| 9073 | ACE inhibitor                             | ACE inhibitor | 1  | TP  | [335-336]                                                                                                   |
| 9074 | ACE inhibitor                             | ACE inhibitor | 2  | DF  | [527-528],[589-590]                                                                                         |
| 9076 | ACE inhibitor                             | ACE inhibitor | 1  | FQ  | [481-482]                                                                                                   |
| 9077 | ACE inhibitor                             | ACE inhibitor | 2  | YV  | [280-281],[444-445]                                                                                         |
| 9078 | ACE inhibitor                             | ACE inhibitor | 3  | YE  | [76-77],[452-453],[464-465]                                                                                 |

|      |                                                          |                |    |     |                                                                                                                                   |
|------|----------------------------------------------------------|----------------|----|-----|-----------------------------------------------------------------------------------------------------------------------------------|
| 9079 | ACE inhibitor                                            | ACE inhibitor  | 3  | IL  | [223-224],[328-329],[587-588]                                                                                                     |
| 9085 | ACE inhibitor                                            | ACE inhibitor  | 1  | MM  | [430-431]                                                                                                                         |
| 9087 | ACE inhibitor                                            | ACE inhibitor  | 1  | YH  | [123-124]                                                                                                                         |
| 9173 | ACE inhibitor                                            | ACE inhibitor  | 11 | RG  | [1-2],[60-61],[88-89],[112-113],[159-160],[170-171],[214-215],[247-248],[427-428],[490-491],[576-577]                             |
| 9183 | ACE inhibitor                                            | ACE inhibitor  | 1  | GTG | [448-450]                                                                                                                         |
| 9184 | ACE inhibitor                                            | ACE inhibitor  | 1  | ST  | [477-478]                                                                                                                         |
| 9185 | ACE inhibitor                                            | ACE inhibitor  | 1  | YN  | [435-436]                                                                                                                         |
| 9196 | ACE inhibitor                                            | ACE inhibitor  | 1  | AVV | [243-245]                                                                                                                         |
| 9213 | ACE inhibitor                                            | ACE inhibitor  | 4  | LR  | [213-214],[321-322],[362-363],[512-513]                                                                                           |
| 9309 | ACE inhibitor                                            | ACE inhibitor  | 2  | RRR | [58-60],[96-98]                                                                                                                   |
| 9566 | ACE inhibitor                                            | ACE inhibitor  | 1  | QP  | [297-298]                                                                                                                         |
| 9730 | ACE inhibitor                                            | ACE inhibitor  | 2  | NPR | [10-12],[68-70]                                                                                                                   |
| 9743 | ACE inhibitor                                            | ACE inhibitor  | 3  | EQR | [73-75],[100-102],[348-350]                                                                                                       |
| 9754 | ACE inhibitor                                            | ACE inhibitor  | 1  | NLR | [511-513]                                                                                                                         |
| 3283 | Antithrombotic peptide                                   | antithrombotic | 2  | GP  | [160-161],[384-385]                                                                                                               |
| 3285 | Antithrombotic peptide                                   | antithrombotic | 1  | PG  | [302-303]                                                                                                                         |
| 3354 | Antithrombotic peptide                                   | antithrombotic | 1  | DEE | [7-9]                                                                                                                             |
| 9660 | Antithrombotic peptide                                   | antithrombotic | 1  | RGD | [490-492]                                                                                                                         |
| 3351 | Stimulating vasoactive substance release                 | stimulating    | 3  | EEE | [173-175],[473-475],[474-476]                                                                                                     |
| 8320 | Glucose uptake stimulating peptide                       | stimulating    | 1  | VL  | [418-419]                                                                                                                         |
| 8321 | Glucose uptake stimulating peptide                       | stimulating    | 3  | LV  | [254-255],[329-330],[419-420]                                                                                                     |
| 8323 | Glucose uptake stimulating peptide                       | stimulating    | 3  | IL  | [223-224],[328-329],[587-588]                                                                                                     |
| 8325 | Glucose uptake stimulating peptide                       | stimulating    | 2  | II  | [354-355],[535-536]                                                                                                               |
| 8326 | Glucose uptake stimulating peptide                       | stimulating    | 3  | LL  | [212-213],[295-296],[514-515]                                                                                                     |
| 8329 | Stimulating vasoactive substance release                 | stimulating    | 14 | EE  | [8-9],[43-44],[47-48],[54-55],[106-107],[173-174],[174-175],[196-197],[408-409],[473-474],[474-475],[475-476],[553-554],[556-557] |
| 8330 | Stimulating vasoactive substance release                 | stimulating    | 2  | SE  | [195-196],[390-391]                                                                                                               |
| 2890 | neuropeptide                                             | neuropeptide   | 9  | GQ  | [29-30],[31-32],[89-90],[303-304],[373-374],[400-401],[466-467],[531-532],[577-578]                                               |
| 8310 | Anxiolytic peptide                                       | neuropeptide   | 2  | YL  | [202-203],[320-321]                                                                                                               |
| 9534 | Kyotorphin                                               | neuropeptide   | 2  | YR  | [18-19],[219-220]                                                                                                                 |
| 2753 | peptide regulating the stomach mucosal membrane activity | regulating     | 2  | GP  | [160-161],[384-385]                                                                                                               |



|      |                                                          |                                           |   |      |                                       |
|------|----------------------------------------------------------|-------------------------------------------|---|------|---------------------------------------|
| 2754 | peptide regulating the stomach mucosal membrane activity | regulating                                | 1 | PG   | [302-303]                             |
| 8318 | Dvl protein binding                                      | anticancer                                | 1 | VVV  | [441-443]                             |
| 3300 |                                                          | antioxidative                             | 1 | PHH  | [234-236]                             |
| 3307 |                                                          | antioxidative                             | 1 | PYY  | [181-183]                             |
| 3318 |                                                          | antioxidative                             | 1 | LPHH | [233-236]                             |
| 3319 |                                                          | antioxidative                             | 1 | HH   | [235-236]                             |
| 7888 | antioxidative peptide                                    | antioxidative                             | 2 | EL   | [211-212],[545-546]                   |
| 7927 | synthetic peptide                                        | antioxidative                             | 1 | EYY  | [307-309]                             |
| 7939 | synthetic peptide                                        | antioxidative                             | 1 | YYA  | [308-310]                             |
| 7943 | synthetic peptide                                        | antioxidative                             | 1 | YYF  | [182-184]                             |
| 8036 | synthetic peptide                                        | antioxidative                             | 1 | PHV  | [457-459]                             |
| 8038 | synthetic peptide                                        | antioxidative                             | 1 | PHY  | [433-435]                             |
| 8042 | synthetic peptide                                        | antioxidative                             | 1 | PWG  | [376-378]                             |
| 8056 | synthetic peptide                                        | antioxidative                             | 1 | RHE  | [192-194]                             |
| 8063 | synthetic peptide                                        | antioxidative                             | 1 | RHN  | [178-180]                             |
| 8103 | peptide derived from dried bonito                        | antioxidative                             | 1 | VKL  | [293-295]                             |
| 8130 | peptide derived from dried bonito                        | antioxidative                             | 1 | EAK  | [542-544]                             |
| 8134 | peptide derived from dried bonito                        | antioxidative                             | 1 | KD   | [237-238]                             |
| 8190 | peptide from buckwheat                                   | antioxidative                             | 1 | PW   | [376-377]                             |
| 8215 | Antioxidative peptide                                    | antioxidative                             | 4 | IR   | [40-41],[189-190],[271-272],[355-356] |
| 8217 | Antioxidative peptide                                    | antioxidative                             | 1 | LK   | [388-389]                             |
| 8224 | antioxidative peptide                                    | antioxidative                             | 2 | VY   | [279-280],[443-444]                   |
| 8484 | Antioxidant peptide from as1-CN (98-100)                 | antioxidative                             | 1 | LLR  | [212-214]                             |
| 9082 | Antioxidative peptide                                    | antioxidative                             | 1 | WG   | [377-378]                             |
| 9086 | Antioxidative peptide                                    | antioxidative                             | 1 | MM   | [430-431]                             |
| 9361 | Antioxidative peptide                                    | antioxidative                             | 2 | VYV  | [279-281],[443-445]                   |
| 9363 | Antioxidative peptide                                    | antioxidative                             | 1 | NEN  | [509-511]                             |
| 9366 | Antioxidative peptide                                    | antioxidative                             | 1 | KYL  | [201-203]                             |
| 9368 | Antioxidative peptide                                    | antioxidative                             | 1 | EQC  | [77-79]                               |
| 3164 | laminin-like peptide                                     | embryotoxic                               | 1 | RGD  | [490-492]                             |
| 4005 |                                                          | activating ubiquitin-mediated proteolysis | 3 | RA   | [249-250],[356-357],[363-364]         |

|      |                                                      |                                           |   |     |                                                   |
|------|------------------------------------------------------|-------------------------------------------|---|-----|---------------------------------------------------|
| 4006 | Ubiquitin-mediated proteolysis activating peptide    | activating ubiquitin-mediated proteolysis | 3 | LA  | [488-489],[529-530],[584-585]                     |
| 9650 | Alpha-glucosidase inhibitor                          | alpha-glucosidase inhibitor               | 3 | EA  | [162-163],[404-405],[542-543]                     |
| 9693 | Alpha-glucosidase inhibitor                          | alpha-glucosidase inhibitor               | 1 | VE  | [446-447]                                         |
| 9694 | Alpha-glucosidase inhibitor                          | alpha-glucosidase inhibitor               | 4 | PE  | [72-73],[137-138],[161-162],[407-408]             |
| 3169 | dipeptidyl peptidase IV inhibitor (DPP IV inhibitor) | dipeptidyl peptidase IV inhibitor         | 2 | GP  | [160-161],[384-385]                               |
| 3171 | dipeptidyl peptidase IV inhibitor (DPP IV inhibitor) | dipeptidyl peptidase IV inhibitor         | 1 | MP  | [550-551]                                         |
| 3172 | dipeptidyl peptidase IV inhibitor (DPP IV inhibitor) | dipeptidyl peptidase IV inhibitor         | 2 | VA  | [242-243],[330-331]                               |
| 3173 | dipeptidyl peptidase IV inhibitor (DPP IV inhibitor) | dipeptidyl peptidase IV inhibitor         | 1 | MA  | [454-455]                                         |
| 3174 | dipeptidyl peptidase IV inhibitor (DPP IV inhibitor) | dipeptidyl peptidase IV inhibitor         | 1 | KA  | [438-439]                                         |
| 3175 | dipeptidyl peptidase IV inhibitor (DPP IV inhibitor) | dipeptidyl peptidase IV inhibitor         | 3 | LA  | [488-489],[529-530],[584-585]                     |
| 3176 | dipeptidyl peptidase IV inhibitor (DPP IV inhibitor) | dipeptidyl peptidase IV inhibitor         | 1 | FA  | [590-591]                                         |
| 3179 | dipeptidyl peptidase IV inhibitor (DPP IV inhibitor) | dipeptidyl peptidase IV inhibitor         | 2 | PA  | [274-275],[497-498]                               |
| 3180 | dipeptidyl peptidase IV inhibitor (DPP IV inhibitor) | dipeptidyl peptidase IV inhibitor         | 1 | LP  | [233-234]                                         |
| 3181 | dipeptidyl peptidase IV inhibitor (DPP IV inhibitor) | dipeptidyl peptidase IV inhibitor         | 3 | VP  | [273-274],[432-433],[568-569]                     |
| 3182 | dipeptidyl peptidase IV inhibitor (DPP IV inhibitor) | dipeptidyl peptidase IV inhibitor         | 3 | LL  | [212-213],[295-296],[514-515]                     |
| 3183 | dipeptidyl peptidase IV inhibitor (DPP IV inhibitor) | dipeptidyl peptidase IV inhibitor         | 5 | VV  | [221-222],[244-245],[441-442],[442-443],[445-446] |
| 3184 | dipeptidyl peptidase IV inhibitor (DPP IV inhibitor) | dipeptidyl peptidase IV inhibitor         | 1 | HA  | [368-369]                                         |
| 8304 | Dipeptidyl peptidase IV inhibitor (DPP IV inhibitor) | dipeptidyl peptidase IV inhibitor         | 1 | IPA | [496-498]                                         |
| 8501 | Dipeptidyl peptidase IV inhibitor (DPP IV inhibitor) | dipeptidyl peptidase IV inhibitor         | 1 | IP  | [496-497]                                         |
| 8503 | Dipeptidyl peptidase IV inhibitor (DPP IV inhibitor) | dipeptidyl peptidase IV inhibitor         | 1 | TP  | [335-336]                                         |

|      |                                                      |                                   |   |     |                                               |
|------|------------------------------------------------------|-----------------------------------|---|-----|-----------------------------------------------|
| 8505 | dipeptidyl peptidase IV inhibitor (DPP IV inhibitor) | dipeptidyl peptidase IV inhibitor | 4 | SP  | [136-137],[164-165],[315-316],[392-393]       |
| 8518 | dipeptidyl peptidase IV inhibitor (DPP IV inhibitor) | dipeptidyl peptidase IV inhibitor | 1 | RP  | [375-376]                                     |
| 8520 | dipeptidyl peptidase IV inhibitor (DPP IV inhibitor) | dipeptidyl peptidase IV inhibitor | 2 | HP  | [500-501],[582-583]                           |
| 8524 | dipeptidyl peptidase IV inhibitor (DPP IV inhibitor) | dipeptidyl peptidase IV inhibitor | 3 | GA  | [276-277],[312-313],[428-429]                 |
| 8525 | dipeptidyl peptidase IV inhibitor (DPP IV inhibitor) | dipeptidyl peptidase IV inhibitor | 1 | IA  | [502-503]                                     |
| 8526 | dipeptidyl peptidase IV inhibitor (DPP IV inhibitor) | dipeptidyl peptidase IV inhibitor | 3 | RA  | [249-250],[356-357],[363-364]                 |
| 8530 | dipeptidyl peptidase IV inhibitor (DPP IV inhibitor) | dipeptidyl peptidase IV inhibitor | 5 | NP  | [10-11],[68-69],[180-181],[227-228],[301-302] |
| 8531 | dipeptidyl peptidase IV inhibitor (DPP IV inhibitor) | dipeptidyl peptidase IV inhibitor | 2 | TA  | [485-486],[505-506]                           |
| 8532 | dipeptidyl peptidase IV inhibitor (DPP IV inhibitor) | dipeptidyl peptidase IV inhibitor | 1 | QP  | [297-298]                                     |
| 8555 | dipeptidyl peptidase IV inhibitor (DPP IV inhibitor) | dipeptidyl peptidase IV inhibitor | 1 | FL  | [528-529]                                     |
| 8558 | dipeptidyl peptidase IV inhibitor (DPP IV inhibitor) | dipeptidyl peptidase IV inhibitor | 1 | EK  | [360-361]                                     |
| 8559 | dipeptidyl peptidase IV inhibitor (DPP IV inhibitor) | dipeptidyl peptidase IV inhibitor | 2 | AL  | [332-333],[364-365]                           |
| 8560 | dipeptidyl peptidase IV inhibitor (DPP IV inhibitor) | dipeptidyl peptidase IV inhibitor | 1 | SL  | [387-388]                                     |
| 8637 | dipeptidyl peptidase IV inhibitor (DPP IV inhibitor) | dipeptidyl peptidase IV inhibitor | 2 | AA  | [310-311],[331-332]                           |
| 8638 | dipeptidyl peptidase IV inhibitor (DPP IV inhibitor) | dipeptidyl peptidase IV inhibitor | 1 | PL  | [583-584]                                     |
| 8689 | dipeptidyl peptidase IV inhibitor (DPP IV inhibitor) | dipeptidyl peptidase IV inhibitor | 1 | LQP | [296-298]                                     |
| 8697 | dipeptidyl peptidase IV inhibitor (DPP IV inhibitor) | dipeptidyl peptidase IV inhibitor | 1 | WG  | [377-378]                                     |
| 8758 | dipeptidyl peptidase IV inhibitor (DPP IV inhibitor) | dipeptidyl peptidase IV inhibitor | 2 | AE  | [239-240],[423-424]                           |
| 8759 | dipeptidyl peptidase IV inhibitor (DPP IV inhibitor) | dipeptidyl peptidase IV inhibitor | 1 | AF  | [591-592]                                     |

|      |                                                      |                                   |   |    |                                                                                 |
|------|------------------------------------------------------|-----------------------------------|---|----|---------------------------------------------------------------------------------|
| 8760 | dipeptidyl peptidase IV inhibitor (DPP IV inhibitor) | dipeptidyl peptidase IV inhibitor | 5 | AG | [275-276],[311-312],[372-373],[498-499],[530-531]                               |
| 8762 | dipeptidyl peptidase IV inhibitor (DPP IV inhibitor) | dipeptidyl peptidase IV inhibitor | 4 | AS | [163-164],[357-358],[506-507],[585-586]                                         |
| 8763 | dipeptidyl peptidase IV inhibitor (DPP IV inhibitor) | dipeptidyl peptidase IV inhibitor | 3 | AT | [250-251],[277-278],[439-440]                                                   |
| 8764 | dipeptidyl peptidase IV inhibitor (DPP IV inhibitor) | dipeptidyl peptidase IV inhibitor | 1 | AV | [243-244]                                                                       |
| 8767 | dipeptidyl peptidase IV inhibitor (DPP IV inhibitor) | dipeptidyl peptidase IV inhibitor | 3 | DP | [13-14],[71-72],[118-119]                                                       |
| 8768 | dipeptidyl peptidase IV inhibitor (DPP IV inhibitor) | dipeptidyl peptidase IV inhibitor | 4 | DQ | [49-50],[66-67],[317-318],[345-346]                                             |
| 8769 | dipeptidyl peptidase IV inhibitor (DPP IV inhibitor) | dipeptidyl peptidase IV inhibitor | 2 | DR | [115-116],[338-339]                                                             |
| 8770 | dipeptidyl peptidase IV inhibitor (DPP IV inhibitor) | dipeptidyl peptidase IV inhibitor | 4 | EG | [197-198],[351-352],[447-448],[465-466]                                         |
| 8771 | dipeptidyl peptidase IV inhibitor (DPP IV inhibitor) | dipeptidyl peptidase IV inhibitor | 1 | EH | [409-410]                                                                       |
| 8772 | dipeptidyl peptidase IV inhibitor (DPP IV inhibitor) | dipeptidyl peptidase IV inhibitor | 3 | EI | [424-425],[554-555],[557-558]                                                   |
| 8773 | dipeptidyl peptidase IV inhibitor (DPP IV inhibitor) | dipeptidyl peptidase IV inhibitor | 8 | ES | [168-169],[194-195],[240-241],[261-262],[391-392],[476-477],[560-561],[564-565] |
| 8774 | dipeptidyl peptidase IV inhibitor (DPP IV inhibitor) | dipeptidyl peptidase IV inhibitor | 1 | ET | [258-259]                                                                       |
| 8775 | dipeptidyl peptidase IV inhibitor (DPP IV inhibitor) | dipeptidyl peptidase IV inhibitor | 1 | EV | [199-200]                                                                       |
| 8777 | dipeptidyl peptidase IV inhibitor (DPP IV inhibitor) | dipeptidyl peptidase IV inhibitor | 2 | EY | [23-24],[307-308]                                                               |
| 8778 | dipeptidyl peptidase IV inhibitor (DPP IV inhibitor) | dipeptidyl peptidase IV inhibitor | 2 | FN | [263-264],[548-549]                                                             |
| 8779 | dipeptidyl peptidase IV inhibitor (DPP IV inhibitor) | dipeptidyl peptidase IV inhibitor | 1 | FQ | [481-482]                                                                       |
| 8780 | dipeptidyl peptidase IV inhibitor (DPP IV inhibitor) | dipeptidyl peptidase IV inhibitor | 1 | FR | [305-306]                                                                       |
| 8781 | dipeptidyl peptidase IV inhibitor (DPP IV inhibitor) | dipeptidyl peptidase IV inhibitor | 2 | GE | [198-199],[521-522]                                                             |
| 8782 | dipeptidyl peptidase IV inhibitor (DPP IV inhibitor) | dipeptidyl peptidase IV inhibitor | 1 | GF | [516-517]                                                                       |

|      |                                                      |                                   |   |    |                                       |
|------|------------------------------------------------------|-----------------------------------|---|----|---------------------------------------|
| 8783 | dipeptidyl peptidase IV inhibitor (DPP IV inhibitor) | dipeptidyl peptidase IV inhibitor | 1 | GG | [383-384]                             |
| 8784 | dipeptidyl peptidase IV inhibitor (DPP IV inhibitor) | dipeptidyl peptidase IV inhibitor | 1 | GH | [499-500]                             |
| 8785 | dipeptidyl peptidase IV inhibitor (DPP IV inhibitor) | dipeptidyl peptidase IV inhibitor | 1 | GI | [215-216]                             |
| 8786 | dipeptidyl peptidase IV inhibitor (DPP IV inhibitor) | dipeptidyl peptidase IV inhibitor | 1 | GV | [352-353]                             |
| 8790 | dipeptidyl peptidase IV inhibitor (DPP IV inhibitor) | dipeptidyl peptidase IV inhibitor | 1 | HE | [193-194]                             |
| 8792 | dipeptidyl peptidase IV inhibitor (DPP IV inhibitor) | dipeptidyl peptidase IV inhibitor | 1 | HH | [235-236]                             |
| 8794 | dipeptidyl peptidase IV inhibitor (DPP IV inhibitor) | dipeptidyl peptidase IV inhibitor | 2 | HR | [124-125],[410-411]                   |
| 8795 | dipeptidyl peptidase IV inhibitor (DPP IV inhibitor) | dipeptidyl peptidase IV inhibitor | 1 | HS | [185-186]                             |
| 8797 | dipeptidyl peptidase IV inhibitor (DPP IV inhibitor) | dipeptidyl peptidase IV inhibitor | 1 | HV | [458-459]                             |
| 8799 | dipeptidyl peptidase IV inhibitor (DPP IV inhibitor) | dipeptidyl peptidase IV inhibitor | 1 | HY | [434-435]                             |
| 8801 | dipeptidyl peptidase IV inhibitor (DPP IV inhibitor) | dipeptidyl peptidase IV inhibitor | 2 | II | [354-355],[535-536]                   |
| 8802 | dipeptidyl peptidase IV inhibitor (DPP IV inhibitor) | dipeptidyl peptidase IV inhibitor | 3 | IL | [223-224],[328-329],[587-588]         |
| 8804 | dipeptidyl peptidase IV inhibitor (DPP IV inhibitor) | dipeptidyl peptidase IV inhibitor | 3 | IN | [282-283],[519-520],[536-537]         |
| 8805 | dipeptidyl peptidase IV inhibitor (DPP IV inhibitor) | dipeptidyl peptidase IV inhibitor | 1 | IQ | [132-133]                             |
| 8806 | dipeptidyl peptidase IV inhibitor (DPP IV inhibitor) | dipeptidyl peptidase IV inhibitor | 4 | IR | [40-41],[189-190],[271-272],[355-356] |
| 8808 | dipeptidyl peptidase IV inhibitor (DPP IV inhibitor) | dipeptidyl peptidase IV inhibitor | 2 | KE | [152-153],[544-545]                   |
| 8814 | dipeptidyl peptidase IV inhibitor (DPP IV inhibitor) | dipeptidyl peptidase IV inhibitor | 1 | KR | [426-427]                             |
| 8815 | dipeptidyl peptidase IV inhibitor (DPP IV inhibitor) | dipeptidyl peptidase IV inhibitor | 2 | KS | [314-315],[389-390]                   |
| 8817 | dipeptidyl peptidase IV inhibitor (DPP IV inhibitor) | dipeptidyl peptidase IV inhibitor | 1 | KV | [483-484]                             |

|      |                                                      |                                   |   |    |                                         |
|------|------------------------------------------------------|-----------------------------------|---|----|-----------------------------------------|
| 8819 | dipeptidyl peptidase IV inhibitor (DPP IV inhibitor) | dipeptidyl peptidase IV inhibitor | 1 | KY | [201-202]                               |
| 8823 | dipeptidyl peptidase IV inhibitor (DPP IV inhibitor) | dipeptidyl peptidase IV inhibitor | 1 | LN | [333-334]                               |
| 8824 | dipeptidyl peptidase IV inhibitor (DPP IV inhibitor) | dipeptidyl peptidase IV inhibitor | 1 | LT | [252-253]                               |
| 8825 | dipeptidyl peptidase IV inhibitor (DPP IV inhibitor) | dipeptidyl peptidase IV inhibitor | 3 | LV | [254-255],[329-330],[419-420]           |
| 8826 | dipeptidyl peptidase IV inhibitor (DPP IV inhibitor) | dipeptidyl peptidase IV inhibitor | 1 | ME | [563-564]                               |
| 8832 | dipeptidyl peptidase IV inhibitor (DPP IV inhibitor) | dipeptidyl peptidase IV inhibitor | 1 | ML | [232-233]                               |
| 8833 | dipeptidyl peptidase IV inhibitor (DPP IV inhibitor) | dipeptidyl peptidase IV inhibitor | 1 | MM | [430-431]                               |
| 8837 | dipeptidyl peptidase IV inhibitor (DPP IV inhibitor) | dipeptidyl peptidase IV inhibitor | 2 | MV | [292-293],[431-432]                     |
| 8840 | dipeptidyl peptidase IV inhibitor (DPP IV inhibitor) | dipeptidyl peptidase IV inhibitor | 1 | ND | [326-327]                               |
| 8841 | dipeptidyl peptidase IV inhibitor (DPP IV inhibitor) | dipeptidyl peptidase IV inhibitor | 2 | NE | [287-288],[509-510]                     |
| 8843 | dipeptidyl peptidase IV inhibitor (DPP IV inhibitor) | dipeptidyl peptidase IV inhibitor | 1 | NG | [520-521]                               |
| 8845 | dipeptidyl peptidase IV inhibitor (DPP IV inhibitor) | dipeptidyl peptidase IV inhibitor | 2 | NL | [264-265],[511-512]                     |
| 8846 | dipeptidyl peptidase IV inhibitor (DPP IV inhibitor) | dipeptidyl peptidase IV inhibitor | 1 | NM | [549-550]                               |
| 8847 | dipeptidyl peptidase IV inhibitor (DPP IV inhibitor) | dipeptidyl peptidase IV inhibitor | 3 | NN | [300-301],[523-524],[533-534]           |
| 8848 | dipeptidyl peptidase IV inhibitor (DPP IV inhibitor) | dipeptidyl peptidase IV inhibitor | 4 | NQ | [283-284],[397-398],[524-525],[537-538] |
| 8850 | dipeptidyl peptidase IV inhibitor (DPP IV inhibitor) | dipeptidyl peptidase IV inhibitor | 2 | NT | [229-230],[334-335]                     |
| 8853 | dipeptidyl peptidase IV inhibitor (DPP IV inhibitor) | dipeptidyl peptidase IV inhibitor | 2 | NY | [218-219],[421-422]                     |
| 8855 | dipeptidyl peptidase IV inhibitor (DPP IV inhibitor) | dipeptidyl peptidase IV inhibitor | 1 | PG | [302-303]                               |
| 8856 | dipeptidyl peptidase IV inhibitor (DPP IV inhibitor) | dipeptidyl peptidase IV inhibitor | 3 | PH | [234-235],[433-434],[457-458]           |

|      |                                                      |                                   |    |    |                                                                                                               |
|------|------------------------------------------------------|-----------------------------------|----|----|---------------------------------------------------------------------------------------------------------------|
| 8857 | dipeptidyl peptidase IV inhibitor (DPP IV inhibitor) | dipeptidyl peptidase IV inhibitor | 2  | PI | [385-386],[501-502]                                                                                           |
| 8860 | dipeptidyl peptidase IV inhibitor (DPP IV inhibitor) | dipeptidyl peptidase IV inhibitor | 1  | PN | [228-229]                                                                                                     |
| 8861 | dipeptidyl peptidase IV inhibitor (DPP IV inhibitor) | dipeptidyl peptidase IV inhibitor | 1  | PQ | [119-120]                                                                                                     |
| 8862 | dipeptidyl peptidase IV inhibitor (DPP IV inhibitor) | dipeptidyl peptidase IV inhibitor | 1  | PS | [393-394]                                                                                                     |
| 8863 | dipeptidyl peptidase IV inhibitor (DPP IV inhibitor) | dipeptidyl peptidase IV inhibitor | 1  | PT | [569-570]                                                                                                     |
| 8864 | dipeptidyl peptidase IV inhibitor (DPP IV inhibitor) | dipeptidyl peptidase IV inhibitor | 1  | PV | [298-299]                                                                                                     |
| 8865 | dipeptidyl peptidase IV inhibitor (DPP IV inhibitor) | dipeptidyl peptidase IV inhibitor | 1  | PW | [376-377]                                                                                                     |
| 8866 | dipeptidyl peptidase IV inhibitor (DPP IV inhibitor) | dipeptidyl peptidase IV inhibitor | 1  | PY | [181-182]                                                                                                     |
| 8868 | dipeptidyl peptidase IV inhibitor (DPP IV inhibitor) | dipeptidyl peptidase IV inhibitor | 2  | QD | [117-118],[284-285]                                                                                           |
| 8869 | dipeptidyl peptidase IV inhibitor (DPP IV inhibitor) | dipeptidyl peptidase IV inhibitor | 10 | QE | [22-23],[53-54],[90-91],[105-106],[133-134],[257-258],[347-348],[359-360],[414-415],[472-473]                 |
| 8870 | dipeptidyl peptidase IV inhibitor (DPP IV inhibitor) | dipeptidyl peptidase IV inhibitor | 3  | QF | [304-305],[398-399],[401-402]                                                                                 |
| 8871 | dipeptidyl peptidase IV inhibitor (DPP IV inhibitor) | dipeptidyl peptidase IV inhibitor | 5  | QG | [28-29],[30-31],[155-156],[467-468],[578-579]                                                                 |
| 8872 | dipeptidyl peptidase IV inhibitor (DPP IV inhibitor) | dipeptidyl peptidase IV inhibitor | 1  | QH | [367-368]                                                                                                     |
| 8873 | dipeptidyl peptidase IV inhibitor (DPP IV inhibitor) | dipeptidyl peptidase IV inhibitor | 2  | QI | [39-40],[131-132]                                                                                             |
| 8874 | dipeptidyl peptidase IV inhibitor (DPP IV inhibitor) | dipeptidyl peptidase IV inhibitor | 2  | QL | [412-413],[538-539]                                                                                           |
| 8875 | dipeptidyl peptidase IV inhibitor (DPP IV inhibitor) | dipeptidyl peptidase IV inhibitor | 3  | QN | [67-68],[508-509],[532-533]                                                                                   |
| 8876 | dipeptidyl peptidase IV inhibitor (DPP IV inhibitor) | dipeptidyl peptidase IV inhibitor | 12 | QQ | [34-35],[35-36],[36-37],[80-81],[81-82],[104-105],[120-121],[121-122],[144-145],[154-155],[176-177],[346-347] |
| 8877 | dipeptidyl peptidase IV inhibitor (DPP IV inhibitor) | dipeptidyl peptidase IV inhibitor | 5  | QS | [135-136],[187-188],[318-319],[462-463],[573-574]                                                             |
| 8878 | dipeptidyl peptidase IV inhibitor (DPP IV inhibitor) | dipeptidyl peptidase IV inhibitor | 1  | QT | [92-93]                                                                                                       |

|      |                                                      |                                   |    |    |                                                                                                             |
|------|------------------------------------------------------|-----------------------------------|----|----|-------------------------------------------------------------------------------------------------------------|
| 8881 | dipeptidyl peptidase IV inhibitor (DPP IV inhibitor) | dipeptidyl peptidase IV inhibitor | 3  | QY | [17-18],[122-123],[150-151]                                                                                 |
| 8882 | dipeptidyl peptidase IV inhibitor (DPP IV inhibitor) | dipeptidyl peptidase IV inhibitor | 11 | RG | [1-2],[60-61],[88-89],[112-113],[159-160],[170-171],[214-215],[247-248],[427-428],[490-491],[576-577]       |
| 8883 | dipeptidyl peptidase IV inhibitor (DPP IV inhibitor) | dipeptidyl peptidase IV inhibitor | 2  | RH | [178-179],[192-193]                                                                                         |
| 8886 | dipeptidyl peptidase IV inhibitor (DPP IV inhibitor) | dipeptidyl peptidase IV inhibitor | 5  | RL | [45-46],[289-290],[339-340],[487-488],[513-514]                                                             |
| 8889 | dipeptidyl peptidase IV inhibitor (DPP IV inhibitor) | dipeptidyl peptidase IV inhibitor | 12 | RR | [26-27],[58-59],[59-60],[87-88],[96-97],[97-98],[102-103],[128-129],[166-167],[379-380],[469-470],[575-576] |
| 8891 | dipeptidyl peptidase IV inhibitor (DPP IV inhibitor) | dipeptidyl peptidase IV inhibitor | 2  | SF | [262-263],[547-548]                                                                                         |
| 8893 | dipeptidyl peptidase IV inhibitor (DPP IV inhibitor) | dipeptidyl peptidase IV inhibitor | 2  | SI | [188-189],[586-587]                                                                                         |
| 8894 | dipeptidyl peptidase IV inhibitor (DPP IV inhibitor) | dipeptidyl peptidase IV inhibitor | 1  | SK | [437-438]                                                                                                   |
| 8895 | dipeptidyl peptidase IV inhibitor (DPP IV inhibitor) | dipeptidyl peptidase IV inhibitor | 1  | SV | [241-242]                                                                                                   |
| 8897 | dipeptidyl peptidase IV inhibitor (DPP IV inhibitor) | dipeptidyl peptidase IV inhibitor | 4  | SY | [319-320],[394-395],[463-464],[565-566]                                                                     |
| 8899 | dipeptidyl peptidase IV inhibitor (DPP IV inhibitor) | dipeptidyl peptidase IV inhibitor | 3  | TE | [207-208],[210-211],[570-571]                                                                               |
| 8901 | dipeptidyl peptidase IV inhibitor (DPP IV inhibitor) | dipeptidyl peptidase IV inhibitor | 2  | TG | [449-450],[478-479]                                                                                         |
| 8905 | dipeptidyl peptidase IV inhibitor (DPP IV inhibitor) | dipeptidyl peptidase IV inhibitor | 3  | TL | [93-94],[251-252],[253-254]                                                                                 |
| 8909 | dipeptidyl peptidase IV inhibitor (DPP IV inhibitor) | dipeptidyl peptidase IV inhibitor | 2  | TR | [246-247],[259-260]                                                                                         |
| 8910 | dipeptidyl peptidase IV inhibitor (DPP IV inhibitor) | dipeptidyl peptidase IV inhibitor | 1  | TS | [230-231]                                                                                                   |
| 8912 | dipeptidyl peptidase IV inhibitor (DPP IV inhibitor) | dipeptidyl peptidase IV inhibitor | 2  | TV | [278-279],[440-441]                                                                                         |
| 8915 | dipeptidyl peptidase IV inhibitor (DPP IV inhibitor) | dipeptidyl peptidase IV inhibitor | 1  | VD | [64-65]                                                                                                     |
| 8916 | dipeptidyl peptidase IV inhibitor (DPP IV inhibitor) | dipeptidyl peptidase IV inhibitor | 1  | VE | [446-447]                                                                                                   |
| 8917 | dipeptidyl peptidase IV inhibitor (DPP IV inhibitor) | dipeptidyl peptidase IV inhibitor | 1  | VF | [323-324]                                                                                                   |



|      |                                                      |                                    |   |    |                                                   |
|------|------------------------------------------------------|------------------------------------|---|----|---------------------------------------------------|
| 8920 | dipeptidyl peptidase IV inhibitor (DPP IV inhibitor) | dipeptidyl peptidase IV inhibitor  | 5 | VI | [222-223],[270-271],[281-282],[353-354],[495-496] |
| 8921 | dipeptidyl peptidase IV inhibitor (DPP IV inhibitor) | dipeptidyl peptidase IV inhibitor  | 2 | VK | [200-201],[293-294]                               |
| 8922 | dipeptidyl peptidase IV inhibitor (DPP IV inhibitor) | dipeptidyl peptidase IV inhibitor  | 1 | VL | [418-419]                                         |
| 8924 | dipeptidyl peptidase IV inhibitor (DPP IV inhibitor) | dipeptidyl peptidase IV inhibitor  | 2 | VN | [299-300],[420-421]                               |
| 8926 | dipeptidyl peptidase IV inhibitor (DPP IV inhibitor) | dipeptidyl peptidase IV inhibitor  | 2 | VS | [255-256],[459-460]                               |
| 8927 | dipeptidyl peptidase IV inhibitor (DPP IV inhibitor) | dipeptidyl peptidase IV inhibitor  | 2 | VT | [245-246],[484-485]                               |
| 8929 | dipeptidyl peptidase IV inhibitor (DPP IV inhibitor) | dipeptidyl peptidase IV inhibitor  | 2 | VY | [279-280],[443-444]                               |
| 8932 | dipeptidyl peptidase IV inhibitor (DPP IV inhibitor) | dipeptidyl peptidase IV inhibitor  | 2 | YA | [309-310],[422-423]                               |
| 8934 | dipeptidyl peptidase IV inhibitor (DPP IV inhibitor) | dipeptidyl peptidase IV inhibitor  | 3 | YE | [76-77],[452-453],[464-465]                       |
| 8935 | dipeptidyl peptidase IV inhibitor (DPP IV inhibitor) | dipeptidyl peptidase IV inhibitor  | 2 | YF | [183-184],[566-567]                               |
| 8937 | dipeptidyl peptidase IV inhibitor (DPP IV inhibitor) | dipeptidyl peptidase IV inhibitor  | 1 | YH | [123-124]                                         |
| 8939 | dipeptidyl peptidase IV inhibitor (DPP IV inhibitor) | dipeptidyl peptidase IV inhibitor  | 1 | YK | [151-152]                                         |
| 8940 | dipeptidyl peptidase IV inhibitor (DPP IV inhibitor) | dipeptidyl peptidase IV inhibitor  | 2 | YL | [202-203],[320-321]                               |
| 8942 | dipeptidyl peptidase IV inhibitor (DPP IV inhibitor) | dipeptidyl peptidase IV inhibitor  | 1 | YN | [435-436]                                         |
| 8944 | dipeptidyl peptidase IV inhibitor (DPP IV inhibitor) | dipeptidyl peptidase IV inhibitor  | 2 | YR | [18-19],[219-220]                                 |
| 8945 | dipeptidyl peptidase IV inhibitor (DPP IV inhibitor) | dipeptidyl peptidase IV inhibitor  | 1 | YS | [395-396]                                         |
| 8946 | dipeptidyl peptidase IV inhibitor (DPP IV inhibitor) | dipeptidyl peptidase IV inhibitor  | 2 | YV | [280-281],[444-445]                               |
| 8948 | dipeptidyl peptidase IV inhibitor (DPP IV inhibitor) | dipeptidyl peptidase IV inhibitor  | 2 | YY | [182-183],[308-309]                               |
| 9476 | DPP-III inhibitor                                    | dipeptidyl peptidase III inhibitor | 2 | YY | [182-183],[308-309]                               |
| 9478 | DPP-III inhibitor                                    | dipeptidyl peptidase III inhibitor | 4 | LR | [213-214],[321-322],[362-363],[512-513]           |

|      |                   |                                    |    |    |                                                                                                             |
|------|-------------------|------------------------------------|----|----|-------------------------------------------------------------------------------------------------------------|
| 9480 | DPP-III inhibitor | dipeptidyl peptidase III inhibitor | 2  | YF | [183-184],[566-567]                                                                                         |
| 9481 | DPP-III inhibitor | dipeptidyl peptidase III inhibitor | 1  | YH | [123-124]                                                                                                   |
| 9482 | DPP-III inhibitor | dipeptidyl peptidase III inhibitor | 2  | YL | [202-203],[320-321]                                                                                         |
| 9483 | DPP-III inhibitor | dipeptidyl peptidase III inhibitor | 1  | YK | [151-152]                                                                                                   |
| 9484 | DPP-III inhibitor | dipeptidyl peptidase III inhibitor | 2  | YR | [18-19],[219-220]                                                                                           |
| 9485 | DPP-III inhibitor | dipeptidyl peptidase III inhibitor | 12 | RR | [26-27],[58-59],[59-60],[87-88],[96-97],[97-98],[102-103],[128-129],[166-167],[379-380],[469-470],[575-576] |
| 9487 | DPP-III inhibitor | dipeptidyl peptidase III inhibitor | 2  | GE | [198-199],[521-522]                                                                                         |
| 9488 | DPP-III inhibitor | dipeptidyl peptidase III inhibitor | 1  | GF | [516-517]                                                                                                   |
| 9489 | DPP-III inhibitor | dipeptidyl peptidase III inhibitor | 6  | PR | [11-12],[14-15],[69-70],[165-166],[336-337],[551-552]                                                       |
| 9490 | DPP-III inhibitor | dipeptidyl peptidase III inhibitor | 3  | RF | [205-206],[342-343],[480-481]                                                                               |
| 9491 | DPP-III inhibitor | dipeptidyl peptidase III inhibitor | 3  | RV | [220-221],[272-273],[322-323]                                                                               |
| 9492 | DPP-III inhibitor | dipeptidyl peptidase III inhibitor | 2  | DA | [225-226],[238-239]                                                                                         |
| 9494 | DPP-III inhibitor | dipeptidyl peptidase III inhibitor | 1  | HK | [236-237]                                                                                                   |
| 9496 | DPP-III inhibitor | dipeptidyl peptidase III inhibitor | 2  | HP | [500-501],[582-583]                                                                                         |
| 9499 | DPP-III inhibitor | dipeptidyl peptidase III inhibitor | 3  | LA | [488-489],[529-530],[584-585]                                                                               |
| 9500 | DPP-III inhibitor | dipeptidyl peptidase III inhibitor | 1  | FA | [590-591]                                                                                                   |
| 9501 | DPP-III inhibitor | dipeptidyl peptidase III inhibitor | 1  | FR | [305-306]                                                                                                   |
| 9502 | DPP-III inhibitor | dipeptidyl peptidase III inhibitor | 1  | FL | [528-529]                                                                                                   |
| 9504 | DPP-III inhibitor | dipeptidyl peptidase III inhibitor | 4  | PE | [72-73],[137-138],[161-162],[407-408]                                                                       |
| 9507 | DPP-III inhibitor | dipeptidyl peptidase III inhibitor | 1  | SM | [231-232]                                                                                                   |
| 9509 | DPP-III inhibitor | dipeptidyl peptidase III inhibitor | 2  | VY | [279-280],[443-444]                                                                                         |
| 9511 | DPP-III inhibitor | dipeptidyl peptidase III inhibitor | 1  | KA | [438-439]                                                                                                   |
| 8247 | CaMPDE inhibitor  | CaMPDE inhibitor                   | 4  | IR | [40-41],[189-190],[271-272],[355-356]                                                                       |
| 2835 | Renin inhibitor   | renin inhibitor                    | 1  | FT | [206-207]                                                                                                   |
| 2842 | Renin inhibitor   | renin inhibitor                    | 4  | LR | [213-214],[321-322],[362-363],[512-513]                                                                     |
| 8246 | renin inhibitor   | renin inhibitor                    | 4  | IR | [40-41],[189-190],[271-272],[355-356]                                                                       |
| 9431 | Renin inhibitor   | renin inhibitor                    | 3  | QF | [304-305],[398-399],[401-402]                                                                               |
| 9432 | Renin inhibitor   | renin inhibitor                    | 2  | SF | [262-263],[547-548]                                                                                         |
| 9433 | Renin inhibitor   | renin inhibitor                    | 2  | YA | [309-310],[422-423]                                                                                         |

Table S15. Profile of potential biological activity of fragments of protein Jug r 3.

| ID   | Name of peptide                         | Activity      | Number | Sequence | Location                                |
|------|-----------------------------------------|---------------|--------|----------|-----------------------------------------|
| 3460 | Prolyl endopeptidase inhibitor          | antiamnestic  | 3      | PG       | [87-88],[91-92],[98-99]                 |
| 3361 | ACE inhibitor from sardine              | ACE inhibitor | 1      | LKL      | [7-9]                                   |
| 3375 | ACE inhibitor                           | ACE inhibitor | 1      | AAP      | [20-22]                                 |
| 3421 | ACE inhibitor                           | ACE inhibitor | 1      | LVL      | [5-7]                                   |
| 3518 | ACE inhibitor                           | ACE inhibitor | 1      | VAA      | [19-21]                                 |
| 3524 | ACE inhibitor (from bovine beta-CN)     | ACE inhibitor | 1      | VPP      | [51-53]                                 |
| 3532 | ACE inhibitor                           | ACE inhibitor | 1      | GY       | [42-43]                                 |
| 3539 | ACE inhibitor from alpha-zein           | ACE inhibitor | 1      | LAA      | [93-95]                                 |
| 3544 | ACE inhibitor                           | ACE inhibitor | 1      | LNP      | [89-91]                                 |
| 7507 | ACE inhibitor from Alaskan pollack skin | ACE inhibitor | 2      | PGL      | [87-89],[91-93]                         |
| 7509 | ACE inhibitor from Alaskan pollack skin | ACE inhibitor | 1      | GLP      | [96-98]                                 |
| 7511 | ACE inhibitor from Alaskan pollack skin | ACE inhibitor | 1      | LPG      | [97-99]                                 |
| 7558 | ACE inhibitor from buckwheat            | ACE inhibitor | 2      | VK       | [59-60],[118-119]                       |
| 7581 | ACE inhibitor                           | ACE inhibitor | 1      | IP       | [86-87]                                 |
| 7584 | ACE inhibitor                           | ACE inhibitor | 1      | AP       | [21-22]                                 |
| 7585 | ACE inhibitor                           | ACE inhibitor | 1      | LA       | [93-94]                                 |
| 7587 | ACE inhibitor                           | ACE inhibitor | 3      | VP       | [48-49],[51-52],[105-106]               |
| 7590 | ACE inhibitor                           | ACE inhibitor | 5      | AA       | [20-21],[65-66],[66-67],[74-75],[94-95] |
| 7594 | ACE inhibitor                           | ACE inhibitor | 1      | VG       | [37-38]                                 |
| 7595 | ACE inhibitor                           | ACE inhibitor | 1      | IG       | [41-42]                                 |
| 7597 | ACE inhibitor                           | ACE inhibitor | 1      | GM       | [11-12]                                 |
| 7599 | ACE inhibitor                           | ACE inhibitor | 3      | GL       | [88-89],[92-93],[96-97]                 |
| 7600 | ACE inhibitor                           | ACE inhibitor | 1      | AG       | [95-96]                                 |
| 7607 | ACE inhibitor                           | ACE inhibitor | 3      | GS       | [3-4],[38-39],[84-85]                   |
| 7608 | ACE inhibitor                           | ACE inhibitor | 2      | GV       | [58-59],[102-103]                       |
| 7610 | ACE inhibitor                           | ACE inhibitor | 1      | GQ       | [31-32]                                 |
| 7611 | ACE inhibitor                           | ACE inhibitor | 1      | GK       | [99-100]                                |
| 7612 | ACE inhibitor                           | ACE inhibitor | 1      | GT       | [46-47]                                 |
| 7618 | ACE inhibitor                           | ACE inhibitor | 2      | SG       | [10-11],[83-84]                         |

|      |                                                          |                                           |   |     |                         |
|------|----------------------------------------------------------|-------------------------------------------|---|-----|-------------------------|
| 7621 | ACE inhibitor                                            | ACE inhibitor                             | 1 | TG  | [2-3]                   |
| 7623 | ACE inhibitor                                            | ACE inhibitor                             | 1 | EA  | [25-26]                 |
| 7624 | ACE inhibitor                                            | ACE inhibitor                             | 1 | NG  | [57-58]                 |
| 7625 | ACE inhibitor                                            | ACE inhibitor                             | 3 | PG  | [87-88],[91-92],[98-99] |
| 7693 | ACE inhibitor from wakame                                | ACE inhibitor                             | 1 | KL  | [8-9]                   |
| 7697 | ACE inhibitor from wakame                                | ACE inhibitor                             | 1 | YK  | [107-108]               |
| 7698 | ACE inhibitor from wakame                                | ACE inhibitor                             | 1 | NK  | [63-64]                 |
| 7743 | ACE inhibitor                                            | ACE inhibitor                             | 2 | KA  | [64-65],[116-117]       |
| 7832 | ACE inhibitor                                            | ACE inhibitor                             | 2 | LN  | [62-63],[89-90]         |
| 7833 | ACE inhibitor                                            | ACE inhibitor                             | 1 | PT  | [49-50]                 |
| 7836 | ACE inhibitor                                            | ACE inhibitor                             | 1 | PP  | [52-53]                 |
| 8951 | ACE inhibitor                                            | ACE inhibitor                             | 2 | AV  | [26-27],[117-118]       |
| 9173 | ACE inhibitor                                            | ACE inhibitor                             | 1 | RG  | [45-46]                 |
| 9184 | ACE inhibitor                                            | ACE inhibitor                             | 2 | ST  | [110-111],[112-113]     |
| 9213 | ACE inhibitor                                            | ACE inhibitor                             | 1 | LR  | [44-45]                 |
| 9756 | ACE inhibitor                                            | ACE inhibitor                             | 1 | PYK | [106-108]               |
| 3285 | Antithrombotic peptide                                   | antithrombotic                            | 3 | PG  | [87-88],[91-92],[98-99] |
| 8320 | Glucose uptake stimulating peptide                       | stimulating                               | 2 | VL  | [6-7],[13-14]           |
| 8321 | Glucose uptake stimulating peptide                       | stimulating                               | 1 | LV  | [5-6]                   |
| 8326 | Glucose uptake stimulating peptide                       | stimulating                               | 1 | LL  | [14-15]                 |
| 2890 | neuropeptide                                             | neuropeptide                              | 1 | GQ  | [31-32]                 |
| 8310 | Anxiolytic peptide                                       | neuropeptide                              | 1 | YL  | [43-44]                 |
| 2754 | peptide regulating the stomach mucosal membrane activity | regulating                                | 3 | PG  | [87-88],[91-92],[98-99] |
| 8217 | Antioxidative peptide                                    | antioxidative                             | 2 | LK  | [7-8],[79-80]           |
| 3751 |                                                          | bacterial permease ligand                 | 1 | KK  | [80-81]                 |
| 9538 | Antiinflammatory peptide                                 | anti inflammatory                         | 1 | VPP | [51-53]                 |
| 4006 | Ubiquitin-mediated proteolysis activating peptide        | activating ubiquitin-mediated proteolysis | 1 | LA  | [93-94]                 |
| 9650 | Alpha-glucosidase inhibitor                              | alpha-glucosidase inhibitor               | 1 | EA  | [25-26]                 |
| 9651 | Alpha-glucosidase inhibitor                              | alpha-glucosidase inhibitor               | 1 | PP  | [52-53]                 |
| 9695 | Alpha-glucosidase inhibitor                              | alpha-glucosidase inhibitor               | 1 | AD  | [70-71]                 |
| 3170 | dipeptidyl peptidase IV inhibitor (DPP IV inhibitor)     | dipeptidyl peptidase IV inhibitor         | 1 | PP  | [52-53]                 |
| 3172 | dipeptidyl peptidase IV inhibitor (DPP IV inhibitor)     | dipeptidyl peptidase IV inhibitor         | 3 | VA  | [19-20],[23-24],[33-34] |

|      |                                                      |                                   |   |    |                                         |
|------|------------------------------------------------------|-----------------------------------|---|----|-----------------------------------------|
| 3174 | dipeptidyl peptidase IV inhibitor (DPP IV inhibitor) | dipeptidyl peptidase IV inhibitor | 2 | KA | [64-65],[116-117]                       |
| 3175 | dipeptidyl peptidase IV inhibitor (DPP IV inhibitor) | dipeptidyl peptidase IV inhibitor | 1 | LA | [93-94]                                 |
| 3177 | dipeptidyl peptidase IV inhibitor (DPP IV inhibitor) | dipeptidyl peptidase IV inhibitor | 1 | AP | [21-22]                                 |
| 3180 | dipeptidyl peptidase IV inhibitor (DPP IV inhibitor) | dipeptidyl peptidase IV inhibitor | 1 | LP | [97-98]                                 |
| 3181 | dipeptidyl peptidase IV inhibitor (DPP IV inhibitor) | dipeptidyl peptidase IV inhibitor | 3 | VP | [48-49],[51-52],[105-106]               |
| 3182 | dipeptidyl peptidase IV inhibitor (DPP IV inhibitor) | dipeptidyl peptidase IV inhibitor | 1 | LL | [14-15]                                 |
| 3183 | dipeptidyl peptidase IV inhibitor (DPP IV inhibitor) | dipeptidyl peptidase IV inhibitor | 1 | VV | [18-19]                                 |
| 8501 | Dipeptidyl peptidase IV inhibitor (DPP IV inhibitor) | dipeptidyl peptidase IV inhibitor | 1 | IP | [86-87]                                 |
| 8530 | dipeptidyl peptidase IV inhibitor (DPP IV inhibitor) | dipeptidyl peptidase IV inhibitor | 1 | NP | [90-91]                                 |
| 8531 | dipeptidyl peptidase IV inhibitor (DPP IV inhibitor) | dipeptidyl peptidase IV inhibitor | 1 | TA | [69-70]                                 |
| 8560 | dipeptidyl peptidase IV inhibitor (DPP IV inhibitor) | dipeptidyl peptidase IV inhibitor | 2 | SL | [4-5],[61-62]                           |
| 8561 | dipeptidyl peptidase IV inhibitor (DPP IV inhibitor) | dipeptidyl peptidase IV inhibitor | 3 | GL | [88-89],[92-93],[96-97]                 |
| 8637 | dipeptidyl peptidase IV inhibitor (DPP IV inhibitor) | dipeptidyl peptidase IV inhibitor | 5 | AA | [20-21],[65-66],[66-67],[74-75],[94-95] |
| 8757 | dipeptidyl peptidase IV inhibitor (DPP IV inhibitor) | dipeptidyl peptidase IV inhibitor | 1 | AD | [70-71]                                 |
| 8758 | dipeptidyl peptidase IV inhibitor (DPP IV inhibitor) | dipeptidyl peptidase IV inhibitor | 1 | AE | [24-25]                                 |
| 8760 | dipeptidyl peptidase IV inhibitor (DPP IV inhibitor) | dipeptidyl peptidase IV inhibitor | 1 | AG | [95-96]                                 |
| 8762 | dipeptidyl peptidase IV inhibitor (DPP IV inhibitor) | dipeptidyl peptidase IV inhibitor | 1 | AS | [34-35]                                 |
| 8763 | dipeptidyl peptidase IV inhibitor (DPP IV inhibitor) | dipeptidyl peptidase IV inhibitor | 1 | AT | [67-68]                                 |
| 8764 | dipeptidyl peptidase IV inhibitor (DPP IV inhibitor) | dipeptidyl peptidase IV inhibitor | 2 | AV | [26-27],[117-118]                       |
| 8769 | dipeptidyl peptidase IV inhibitor (DPP IV inhibitor) | dipeptidyl peptidase IV inhibitor | 1 | DR | [71-72]                                 |
| 8786 | dipeptidyl peptidase IV inhibitor (DPP IV inhibitor) | dipeptidyl peptidase IV inhibitor | 2 | GV | [58-59],[102-103]                       |
| 8788 | dipeptidyl peptidase IV inhibitor (DPP IV inhibitor) | dipeptidyl peptidase IV inhibitor | 1 | GY | [42-43]                                 |
| 8812 | dipeptidyl peptidase IV inhibitor (DPP IV inhibitor) | dipeptidyl peptidase IV inhibitor | 1 | KI | [108-109]                               |
| 8813 | dipeptidyl peptidase IV inhibitor (DPP IV inhibitor) | dipeptidyl peptidase IV inhibitor | 1 | KK | [80-81]                                 |
| 8815 | dipeptidyl peptidase IV inhibitor (DPP IV inhibitor) | dipeptidyl peptidase IV inhibitor | 1 | KS | [60-61]                                 |
| 8816 | dipeptidyl peptidase IV inhibitor (DPP IV inhibitor) | dipeptidyl peptidase IV inhibitor | 1 | KT | [81-82]                                 |
| 8823 | dipeptidyl peptidase IV inhibitor (DPP IV inhibitor) | dipeptidyl peptidase IV inhibitor | 2 | LN | [62-63],[89-90]                         |
| 8825 | dipeptidyl peptidase IV inhibitor (DPP IV inhibitor) | dipeptidyl peptidase IV inhibitor | 1 | LV | [5-6]                                   |
| 8837 | dipeptidyl peptidase IV inhibitor (DPP IV inhibitor) | dipeptidyl peptidase IV inhibitor | 2 | MV | [12-13],[17-18]                         |
| 8843 | dipeptidyl peptidase IV inhibitor (DPP IV inhibitor) | dipeptidyl peptidase IV inhibitor | 1 | NG | [57-58]                                 |
| 8855 | dipeptidyl peptidase IV inhibitor (DPP IV inhibitor) | dipeptidyl peptidase IV inhibitor | 3 | PG | [87-88],[91-92],[98-99]                 |
| 8862 | dipeptidyl peptidase IV inhibitor (DPP IV inhibitor) | dipeptidyl peptidase IV inhibitor | 1 | PS | [53-54]                                 |

|      |                                                      |                                    |   |    |                   |
|------|------------------------------------------------------|------------------------------------|---|----|-------------------|
| 8863 | dipeptidyl peptidase IV inhibitor (DPP IV inhibitor) | dipeptidyl peptidase IV inhibitor  | 1 | PT | [49-50]           |
| 8864 | dipeptidyl peptidase IV inhibitor (DPP IV inhibitor) | dipeptidyl peptidase IV inhibitor  | 1 | PV | [22-23]           |
| 8866 | dipeptidyl peptidase IV inhibitor (DPP IV inhibitor) | dipeptidyl peptidase IV inhibitor  | 1 | PY | [106-107]         |
| 8867 | dipeptidyl peptidase IV inhibitor (DPP IV inhibitor) | dipeptidyl peptidase IV inhibitor  | 1 | QA | [73-74]           |
| 8879 | dipeptidyl peptidase IV inhibitor (DPP IV inhibitor) | dipeptidyl peptidase IV inhibitor  | 1 | QV | [32-33]           |
| 8882 | dipeptidyl peptidase IV inhibitor (DPP IV inhibitor) | dipeptidyl peptidase IV inhibitor  | 1 | RG | [45-46]           |
| 8893 | dipeptidyl peptidase IV inhibitor (DPP IV inhibitor) | dipeptidyl peptidase IV inhibitor  | 1 | SI | [85-86]           |
| 8895 | dipeptidyl peptidase IV inhibitor (DPP IV inhibitor) | dipeptidyl peptidase IV inhibitor  | 2 | SV | [36-37],[104-105] |
| 8901 | dipeptidyl peptidase IV inhibitor (DPP IV inhibitor) | dipeptidyl peptidase IV inhibitor  | 1 | TG | [2-3]             |
| 8907 | dipeptidyl peptidase IV inhibitor (DPP IV inhibitor) | dipeptidyl peptidase IV inhibitor  | 1 | TN | [113-114]         |
| 8910 | dipeptidyl peptidase IV inhibitor (DPP IV inhibitor) | dipeptidyl peptidase IV inhibitor  | 2 | TS | [82-83],[111-112] |
| 8911 | dipeptidyl peptidase IV inhibitor (DPP IV inhibitor) | dipeptidyl peptidase IV inhibitor  | 1 | TT | [68-69]           |
| 8912 | dipeptidyl peptidase IV inhibitor (DPP IV inhibitor) | dipeptidyl peptidase IV inhibitor  | 2 | TV | [47-48],[50-51]   |
| 8918 | dipeptidyl peptidase IV inhibitor (DPP IV inhibitor) | dipeptidyl peptidase IV inhibitor  | 1 | VG | [37-38]           |
| 8920 | dipeptidyl peptidase IV inhibitor (DPP IV inhibitor) | dipeptidyl peptidase IV inhibitor  | 1 | VI | [27-28]           |
| 8921 | dipeptidyl peptidase IV inhibitor (DPP IV inhibitor) | dipeptidyl peptidase IV inhibitor  | 2 | VK | [59-60],[118-119] |
| 8922 | dipeptidyl peptidase IV inhibitor (DPP IV inhibitor) | dipeptidyl peptidase IV inhibitor  | 2 | VL | [6-7],[13-14]     |
| 8926 | dipeptidyl peptidase IV inhibitor (DPP IV inhibitor) | dipeptidyl peptidase IV inhibitor  | 1 | VS | [103-104]         |
| 8939 | dipeptidyl peptidase IV inhibitor (DPP IV inhibitor) | dipeptidyl peptidase IV inhibitor  | 1 | YK | [107-108]         |
| 8940 | dipeptidyl peptidase IV inhibitor (DPP IV inhibitor) | dipeptidyl peptidase IV inhibitor  | 1 | YL | [43-44]           |
| 9478 | DPP-III inhibitor                                    | dipeptidyl peptidase III inhibitor | 1 | LR | [44-45]           |
| 9482 | DPP-III inhibitor                                    | dipeptidyl peptidase III inhibitor | 1 | YL | [43-44]           |
| 9483 | DPP-III inhibitor                                    | dipeptidyl peptidase III inhibitor | 1 | YK | [107-108]         |
| 9499 | DPP-III inhibitor                                    | dipeptidyl peptidase III inhibitor | 1 | LA | [93-94]           |
| 9511 | DPP-III inhibitor                                    | dipeptidyl peptidase III inhibitor | 2 | KA | [64-65],[116-117] |
| 2842 | Renin inhibitor                                      | renin inhibitor                    | 1 | LR | [44-45]           |

Table S16. Profile of potential biological activity of fragments of protein Jug r 4.0101.

| ID   | Name of peptide                         | Activity      | Number | Sequence | Location                                        |
|------|-----------------------------------------|---------------|--------|----------|-------------------------------------------------|
| 3460 | Prolyl endopeptidase inhibitor          | antiamnestic  | 2      | PG       | [110-111],[219-220]                             |
| 3257 | beta-lactokinin                         | ACE inhibitor | 4      | RL       | [40-41],[255-256],[325-326],[478-479]           |
| 3258 | beta-lactokinin                         | ACE inhibitor | 3      | IR       | [139-140],[277-278],[457-458]                   |
| 3381 | ACE inhibitor                           | ACE inhibitor | 2      | LY       | [369-370],[374-375]                             |
| 3383 | ACE inhibitor                           | ACE inhibitor | 2      | IY       | [9-10],[338-339]                                |
| 3384 | ACE inhibitor                           | ACE inhibitor | 2      | VF       | [233-234],[406-407]                             |
| 3492 | ACE inhibitor from sake                 | ACE inhibitor | 2      | VY       | [96-97],[387-388]                               |
| 3502 | ACE inhibitor (BSA fr. 221-222)         | ACE inhibitor | 2      | FP       | [109-110],[150-151]                             |
| 3528 | ACE inhibitor                           | ACE inhibitor | 1      | LVR      | [488-490]                                       |
| 3537 | ACE inhibitor                           | ACE inhibitor | 3      | PR       | [185-186],[279-280],[472-473]                   |
| 3538 | ACE inhibitor                           | ACE inhibitor | 1      | VSP      | [447-449]                                       |
| 3547 | ACE inhibitor                           | ACE inhibitor | 1      | IRA      | [457-459]                                       |
| 3551 | ACE inhibitor (from bovine beta-Lg)     | ACE inhibitor | 3      | LF       | [11-12],[17-18],[108-109]                       |
| 3556 | ACE inhibitor                           | ACE inhibitor | 1      | FY       | [188-189]                                       |
| 3573 |                                         | ACE inhibitor | 1      | AFP      | [149-151]                                       |
| 3713 | ACE inhibitor from alpha-zein           | ACE inhibitor | 1      | LLP      | [85-87]                                         |
| 7414 | ACE inhibitor                           | ACE inhibitor | 1      | LRW      | [357-359]                                       |
| 7502 | ACE inhibitor                           | ACE inhibitor | 1      | IVR      | [266-268]                                       |
| 7513 | ACE inhibitor from Alaskan pollack skin | ACE inhibitor | 1      | PL       | [449-450]                                       |
| 7547 | ACE inhibitor                           | ACE inhibitor | 1      | IRP      | [277-279]                                       |
| 7558 | ACE inhibitor from buckwheat            | ACE inhibitor | 1      | VK       | [426-427]                                       |
| 7562 | ACE inhibitor from soy hydrolysate      | ACE inhibitor | 2      | IA       | [98-99],[148-149]                               |
| 7580 | ACE inhibitor                           | ACE inhibitor | 2      | RW       | [280-281],[358-359]                             |
| 7581 | ACE inhibitor                           | ACE inhibitor | 2      | IP       | [419-420],[471-472]                             |
| 7582 | ACE inhibitor                           | ACE inhibitor | 4      | RP       | [199-200],[218-219],[278-279],[492-493]         |
| 7583 | ACE inhibitor                           | ACE inhibitor | 3      | AF       | [149-150],[245-246],[468-469]                   |
| 7584 | ACE inhibitor                           | ACE inhibitor | 1      | AP       | [92-93]                                         |
| 7585 | ACE inhibitor                           | ACE inhibitor | 5      | LA       | [22-23],[190-191],[242-243],[450-451],[465-466] |
| 7586 | ACE inhibitor                           | ACE inhibitor | 1      | KR       | [427-428]                                       |

|      |                                     |               |   |     |                                                                     |
|------|-------------------------------------|---------------|---|-----|---------------------------------------------------------------------|
| 7587 | ACE inhibitor                       | ACE inhibitor | 1 | VP  | [376-377]                                                           |
| 7588 | ACE inhibitor                       | ACE inhibitor | 5 | RA  | [335-336],[393-394],[428-429],[458-459],[504-505]                   |
| 7589 | ACE inhibitor                       | ACE inhibitor | 1 | YA  | [388-389]                                                           |
| 7591 | ACE inhibitor                       | ACE inhibitor | 2 | GF  | [236-237],[433-434]                                                 |
| 7592 | ACE inhibitor                       | ACE inhibitor | 2 | FR  | [142-143],[198-199]                                                 |
| 7595 | ACE inhibitor                       | ACE inhibitor | 1 | IG  | [330-331]                                                           |
| 7596 | ACE inhibitor                       | ACE inhibitor | 1 | GI  | [103-104]                                                           |
| 7598 | ACE inhibitor                       | ACE inhibitor | 1 | GA  | [367-368]                                                           |
| 7599 | ACE inhibitor                       | ACE inhibitor | 3 | GL  | [83-84],[228-229],[316-317]                                         |
| 7600 | ACE inhibitor                       | ACE inhibitor | 6 | AG  | [54-55],[70-71],[152-153],[191-192],[343-344],[451-452]             |
| 7603 | ACE inhibitor                       | ACE inhibitor | 7 | GR  | [27-28],[101-102],[271-272],[311-312],[344-345],[392-393],[452-453] |
| 7605 | ACE inhibitor                       | ACE inhibitor | 2 | FG  | [33-34],[402-403]                                                   |
| 7606 | ACE inhibitor                       | ACE inhibitor | 5 | DA  | [42-43],[238-239],[244-245],[372-373],[475-476]                     |
| 7607 | ACE inhibitor                       | ACE inhibitor | 1 | GS  | [162-163]                                                           |
| 7608 | ACE inhibitor                       | ACE inhibitor | 4 | GV  | [55-56],[71-72],[106-107],[153-154]                                 |
| 7610 | ACE inhibitor                       | ACE inhibitor | 6 | GQ  | [34-35],[126-127],[202-203],[223-224],[403-404],[414-415]           |
| 7614 | ACE inhibitor                       | ACE inhibitor | 1 | HG  | [222-223]                                                           |
| 7615 | ACE inhibitor                       | ACE inhibitor | 1 | GE  | [220-221]                                                           |
| 7616 | ACE inhibitor                       | ACE inhibitor | 2 | GG  | [26-27],[310-311]                                                   |
| 7617 | ACE inhibitor                       | ACE inhibitor | 2 | QG  | [125-126],[201-202]                                                 |
| 7618 | ACE inhibitor                       | ACE inhibitor | 2 | SG  | [25-26],[235-236]                                                   |
| 7619 | ACE inhibitor                       | ACE inhibitor | 1 | LG  | [229-230]                                                           |
| 7620 | ACE inhibitor                       | ACE inhibitor | 2 | GD  | [145-146],[331-332]                                                 |
| 7621 | ACE inhibitor                       | ACE inhibitor | 1 | TG  | [105-106]                                                           |
| 7622 | ACE inhibitor                       | ACE inhibitor | 4 | EG  | [144-145],[270-271],[413-414],[432-433]                             |
| 7623 | ACE inhibitor                       | ACE inhibitor | 3 | EA  | [51-52],[53-54],[342-343]                                           |
| 7624 | ACE inhibitor                       | ACE inhibitor | 3 | NG  | [19-20],[82-83],[315-316]                                           |
| 7625 | ACE inhibitor                       | ACE inhibitor | 2 | PG  | [110-111],[219-220]                                                 |
| 7628 | ACE inhibitor from k-CN (fr. 67-68) | ACE inhibitor | 3 | VR  | [75-76],[267-268],[489-490]                                         |
| 7634 | ACE inhibitor from k-CN (fr. 21-23) | ACE inhibitor | 1 | YVP | [375-377]                                                           |
| 7635 | ACE inhibitor from k-CN (fr. 51-53) | ACE inhibitor | 1 | VAV | [72-74]                                                             |
| 7680 | ACE inhibitor from pea vicilin      | ACE inhibitor | 1 | QK  | [137-138]                                                           |



|      |                                           |               |   |      |                                                                               |
|------|-------------------------------------------|---------------|---|------|-------------------------------------------------------------------------------|
| 7681 | ACE inhibitor from soy                    | ACE inhibitor | 1 | DG   | [161-162]                                                                     |
| 7683 | ACE inhibitor from garlic                 | ACE inhibitor | 3 | NF   | [187-188],[401-402],[422-423]                                                 |
| 7684 | ACE inhibitor from garlic                 | ACE inhibitor | 1 | SY   | [158-159]                                                                     |
| 7685 | ACE inhibitor from garlic                 | ACE inhibitor | 1 | SF   | [438-439]                                                                     |
| 7692 | ACE inhibitor                             | ACE inhibitor | 1 | KF   | [480-481]                                                                     |
| 7741 | ACE inhibitor                             | ACE inhibitor | 8 | RR   | [76-77],[210-211],[254-255],[263-264],[304-305],[308-309],[477-478],[503-504] |
| 7742 | ACE inhibitor                             | ACE inhibitor | 4 | AR   | [99-100],[253-254],[429-430],[476-477]                                        |
| 7752 | ACE inhibitor from shark meat hydrolysate | ACE inhibitor | 1 | EY   | [205-206]                                                                     |
| 7810 | ACE inhibitor from anchovy and bonito     | ACE inhibitor | 1 | KP   | [3-4]                                                                         |
| 7827 | ACE inhibitor                             | ACE inhibitor | 3 | IE   | [50-51],[57-58],[79-80]                                                       |
| 7828 | ACE inhibitor                             | ACE inhibitor | 3 | EV   | [395-396],[463-464],[506-507]                                                 |
| 7829 | ACE inhibitor                             | ACE inhibitor | 1 | VE   | [269-270]                                                                     |
| 7830 | ACE inhibitor                             | ACE inhibitor | 2 | TE   | [250-251],[340-341]                                                           |
| 7831 | ACE inhibitor                             | ACE inhibitor | 3 | LQ   | [256-257],[274-275],[360-361]                                                 |
| 7832 | ACE inhibitor                             | ACE inhibitor | 2 | LN   | [38-39],[381-382]                                                             |
| 7833 | ACE inhibitor                             | ACE inhibitor | 1 | PT   | [46-47]                                                                       |
| 7835 | ACE inhibitor                             | ACE inhibitor | 2 | AH   | [155-156],[383-384]                                                           |
| 7837 | ACE inhibitor                             | ACE inhibitor | 4 | PQ   | [87-88],[93-94],[200-201],[420-421]                                           |
| 7838 | ACE inhibitor                             | ACE inhibitor | 1 | EW   | [435-436]                                                                     |
| 7841 | ACE inhibitor                             | ACE inhibitor | 1 | KE   | [292-293]                                                                     |
| 7843 | ACE inhibitor                             | ACE inhibitor | 1 | PH   | [377-378]                                                                     |
| 7859 | ACE inhibitor                             | ACE inhibitor | 1 | IEP  | [79-81]                                                                       |
| 8182 | ACE Inhibitor                             | ACE inhibitor | 1 | ALEP | [43-46]                                                                       |
| 8185 | ACE inhibitor                             | ACE inhibitor | 1 | TF   | [115-116]                                                                     |
| 8193 | ACE inhibitor                             | ACE inhibitor | 2 | AI   | [168-169],[456-457]                                                           |
| 8402 | ACE inhibitor                             | ACE inhibitor | 1 | LVY  | [95-97]                                                                       |
| 8951 | ACE inhibitor                             | ACE inhibitor | 2 | AV   | [73-74],[424-425]                                                             |
| 9029 | ACE inhibitor                             | ACE inhibitor | 1 | ALP  | [459-461]                                                                     |
| 9031 | ACE inhibitor                             | ACE inhibitor | 1 | LEE  | [317-319]                                                                     |
| 9046 | ACE inhibitor                             | ACE inhibitor | 1 | VQV  | [396-398]                                                                     |
| 9074 | ACE inhibitor                             | ACE inhibitor | 1 | DF   | [240-241]                                                                     |
| 9076 | ACE inhibitor                             | ACE inhibitor | 3 | FQ   | [67-68],[131-132],[469-470]                                                   |

|      |                                                                      |                   |   |      |                                                             |
|------|----------------------------------------------------------------------|-------------------|---|------|-------------------------------------------------------------|
| 9077 | ACE inhibitor                                                        | ACE inhibitor     | 1 | YV   | [375-376]                                                   |
| 9078 | ACE inhibitor                                                        | ACE inhibitor     | 1 | YE   | [206-207]                                                   |
| 9079 | ACE inhibitor                                                        | ACE inhibitor     | 1 | IL   | [5-6]                                                       |
| 9107 | ACE inhibitor                                                        | ACE inhibitor     | 1 | WL   | [359-360]                                                   |
| 9173 | ACE inhibitor                                                        | ACE inhibitor     | 6 | RG   | [100-101],[102-103],[227-228],[309-310],[366-367],[391-392] |
| 9184 | ACE inhibitor                                                        | ACE inhibitor     | 2 | ST   | [347-348],[486-487]                                         |
| 9185 | ACE inhibitor                                                        | ACE inhibitor     | 1 | YN   | [159-160]                                                   |
| 9196 | ACE inhibitor                                                        | ACE inhibitor     | 2 | AVV  | [73-75],[424-426]                                           |
| 9213 | ACE inhibitor                                                        | ACE inhibitor     | 5 | LR   | [324-325],[326-327],[357-358],[390-391],[411-412]           |
| 9468 | ACE inhibitor                                                        | ACE inhibitor     | 1 | RALP | [458-461]                                                   |
| 9729 | ACE inhibitor                                                        | ACE inhibitor     | 1 | VVR  | [74-76]                                                     |
| 9730 | ACE inhibitor                                                        | ACE inhibitor     | 1 | NPR  | [184-186]                                                   |
| 3285 | Antithrombotic peptide                                               | antithrombotic    | 2 | PG   | [110-111],[219-220]                                         |
| 3356 | Stimulating vasoactive substance release                             | stimulating       | 1 | LLL  | [84-86]                                                     |
| 8320 | Glucose uptake stimulating peptide                                   | stimulating       | 3 | VL   | [107-108],[356-357],[464-465]                               |
| 8321 | Glucose uptake stimulating peptide                                   | stimulating       | 2 | LV   | [95-96],[488-489]                                           |
| 8322 | Glucose uptake stimulating peptide                                   | stimulating       | 2 | IV   | [14-15],[266-267]                                           |
| 8323 | Glucose uptake stimulating peptide                                   | stimulating       | 1 | IL   | [5-6]                                                       |
| 8324 | Glucose uptake stimulating peptide                                   | stimulating       | 1 | LI   | [13-14]                                                     |
| 8325 | Glucose uptake stimulating peptide                                   | stimulating       | 1 | II   | [147-148]                                                   |
| 8326 | Glucose uptake stimulating peptide                                   | stimulating       | 5 | LL   | [6-7],[84-85],[85-86],[171-172],[416-417]                   |
| 8329 | Stimulating vasoactive substance release                             | stimulating       | 6 | EE   | [117-118],[284-285],[289-290],[318-319],[341-342],[462-463] |
| 8330 | Stimulating vasoactive substance release                             | stimulating       | 4 | SE   | [258-259],[300-301],[302-303],[501-502]                     |
| 3066 | Immunostimulating peptide                                            | immunostimulating | 1 | EAE  | [51-53]                                                     |
| 2890 | neuropeptide                                                         | neuropeptide      | 6 | GQ   | [34-35],[126-127],[202-203],[223-224],[403-404],[414-415]   |
| 8310 | Anxiolytic peptide                                                   | neuropeptide      | 2 | YL   | [10-11],[189-190]                                           |
| 2754 | peptide regulating the stomach mucosal membrane activity             | regulating        | 2 | PG   | [110-111],[219-220]                                         |
| 7868 | peptide from Okara protein                                           | antioxidative     | 1 | ADF  | [239-241]                                                   |
| 7872 | peptide from soybean protein isolates: beta-conglycinin and glycinin | antioxidative     | 2 | LY   | [369-370],[374-375]                                         |
| 7873 | peptide from soybean protein isolates: beta-conglycinin and glycinin | antioxidative     | 2 | IY   | [9-10],[338-339]                                            |

|      |                                                      |                                           |   |     |                                                   |
|------|------------------------------------------------------|-------------------------------------------|---|-----|---------------------------------------------------|
| 7886 | peptide derived from egg white albumin               | antioxidative                             | 2 | AH  | [155-156],[383-384]                               |
| 7888 | antioxidative peptide                                | antioxidative                             | 1 | EL  | [410-411]                                         |
| 8037 | synthetic peptide                                    | antioxidative                             | 1 | PHW | [377-379]                                         |
| 8057 | synthetic peptide                                    | antioxidative                             | 1 | RHF | [140-142]                                         |
| 8064 | synthetic peptide                                    | antioxidative                             | 1 | RHQ | [135-137]                                         |
| 8076 | synthetic peptide                                    | antioxidative                             | 1 | RWL | [358-360]                                         |
| 8214 | Antioxidative peptide                                | antioxidative                             | 2 | RW  | [280-281],[358-359]                               |
| 8215 | Antioxidative peptide                                | antioxidative                             | 3 | IR  | [139-140],[277-278],[457-458]                     |
| 8217 | Antioxidative peptide                                | antioxidative                             | 1 | LK  | [479-480]                                         |
| 8218 | Antioxidative peptide                                | antioxidative                             | 1 | KP  | [3-4]                                             |
| 8220 | antioxidative peptide                                | antioxidative                             | 1 | TFE | [115-117]                                         |
| 8224 | antioxidative peptide                                | antioxidative                             | 2 | VY  | [96-97],[387-388]                                 |
| 9363 | Antioxidative peptide                                | antioxidative                             | 1 | NEN | [442-444]                                         |
| 4005 |                                                      | activating ubiquitin-mediated proteolysis | 5 | RA  | [335-336],[393-394],[428-429],[458-459],[504-505] |
| 4006 | Ubiquitin-mediated proteolysis activating peptide    | activating ubiquitin-mediated proteolysis | 5 | LA  | [22-23],[190-191],[242-243],[450-451],[465-466]   |
| 9580 | Hypolipidemic peptide                                | hypolipidemic                             | 2 | EF  | [130-131],[197-198]                               |
| 9650 | Alpha-glucosidase inhibitor                          | alpha-glucosidase inhibitor               | 3 | EA  | [51-52],[53-54],[342-343]                         |
| 9693 | Alpha-glucosidase inhibitor                          | alpha-glucosidase inhibitor               | 1 | VE  | [269-270]                                         |
| 9694 | Alpha-glucosidase inhibitor                          | alpha-glucosidase inhibitor               | 2 | PE  | [113-114],[461-462]                               |
| 9695 | Alpha-glucosidase inhibitor                          | alpha-glucosidase inhibitor               | 3 | AD  | [239-240],[243-244],[336-337]                     |
| 3172 | dipeptidyl peptidase IV inhibitor (DPP IV inhibitor) | dipeptidyl peptidase IV inhibitor         | 4 | VA  | [15-16],[72-73],[154-155],[167-168]               |
| 3173 | dipeptidyl peptidase IV inhibitor (DPP IV inhibitor) | dipeptidyl peptidase IV inhibitor         | 1 | MA  | [1-2]                                             |
| 3175 | dipeptidyl peptidase IV inhibitor (DPP IV inhibitor) | dipeptidyl peptidase IV inhibitor         | 5 | LA  | [22-23],[190-191],[242-243],[450-451],[465-466]   |
| 3176 | dipeptidyl peptidase IV inhibitor (DPP IV inhibitor) | dipeptidyl peptidase IV inhibitor         | 1 | FA  | [423-424]                                         |
| 3177 | dipeptidyl peptidase IV inhibitor (DPP IV inhibitor) | dipeptidyl peptidase IV inhibitor         | 1 | AP  | [92-93]                                           |
| 3179 | dipeptidyl peptidase IV inhibitor (DPP IV inhibitor) | dipeptidyl peptidase IV inhibitor         | 1 | PA  | [151-152]                                         |
| 3180 | dipeptidyl peptidase IV inhibitor (DPP IV inhibitor) | dipeptidyl peptidase IV inhibitor         | 3 | LP  | [86-87],[354-355],[460-461]                       |
| 3181 | dipeptidyl peptidase IV inhibitor (DPP IV inhibitor) | dipeptidyl peptidase IV inhibitor         | 1 | VP  | [376-377]                                         |
| 3182 | dipeptidyl peptidase IV inhibitor (DPP IV inhibitor) | dipeptidyl peptidase IV inhibitor         | 5 | LL  | [6-7],[84-85],[85-86],[171-172],[416-417]         |
| 3183 | dipeptidyl peptidase IV inhibitor (DPP IV inhibitor) | dipeptidyl peptidase IV inhibitor         | 5 | VV  | [74-75],[166-167],[386-387],[398-399],[425-426]   |
| 8501 | Dipeptidyl peptidase IV inhibitor (DPP IV inhibitor) | dipeptidyl peptidase IV inhibitor         | 2 | IP  | [419-420],[471-472]                               |

|      |                                                      |                                   |   |    |                                                         |
|------|------------------------------------------------------|-----------------------------------|---|----|---------------------------------------------------------|
| 8505 | Dipeptidyl peptidase IV inhibitor (DPP IV inhibitor) | dipeptidyl peptidase IV inhibitor | 1 | SP | [448-449]                                               |
| 8506 | dipeptidyl peptidase IV inhibitor (DPP IV inhibitor) | dipeptidyl peptidase IV inhibitor | 2 | FP | [109-110],[150-151]                                     |
| 8518 | dipeptidyl peptidase IV inhibitor (DPP IV inhibitor) | dipeptidyl peptidase IV inhibitor | 4 | RP | [199-200],[218-219],[278-279],[492-493]                 |
| 8519 | dipeptidyl peptidase IV inhibitor (DPP IV inhibitor) | dipeptidyl peptidase IV inhibitor | 1 | KP | [3-4]                                                   |
| 8524 | dipeptidyl peptidase IV inhibitor (DPP IV inhibitor) | dipeptidyl peptidase IV inhibitor | 1 | GA | [367-368]                                               |
| 8525 | dipeptidyl peptidase IV inhibitor (DPP IV inhibitor) | dipeptidyl peptidase IV inhibitor | 2 | IA | [98-99],[148-149]                                       |
| 8526 | dipeptidyl peptidase IV inhibitor (DPP IV inhibitor) | dipeptidyl peptidase IV inhibitor | 5 | RA | [335-336],[393-394],[428-429],[458-459],[504-505]       |
| 8529 | dipeptidyl peptidase IV inhibitor (DPP IV inhibitor) | dipeptidyl peptidase IV inhibitor | 2 | EP | [45-46],[80-81]                                         |
| 8530 | dipeptidyl peptidase IV inhibitor (DPP IV inhibitor) | dipeptidyl peptidase IV inhibitor | 3 | NP | [164-165],[184-185],[193-194]                           |
| 8531 | dipeptidyl peptidase IV inhibitor (DPP IV inhibitor) | dipeptidyl peptidase IV inhibitor | 2 | TA | [252-253],[467-468]                                     |
| 8555 | dipeptidyl peptidase IV inhibitor (DPP IV inhibitor) | dipeptidyl peptidase IV inhibitor | 2 | FL | [12-13],[241-242]                                       |
| 8556 | dipeptidyl peptidase IV inhibitor (DPP IV inhibitor) | dipeptidyl peptidase IV inhibitor | 1 | WV | [436-437]                                               |
| 8559 | dipeptidyl peptidase IV inhibitor (DPP IV inhibitor) | dipeptidyl peptidase IV inhibitor | 6 | AL | [16-17],[43-44],[368-369],[373-374],[389-390],[459-460] |
| 8560 | dipeptidyl peptidase IV inhibitor (DPP IV inhibitor) | dipeptidyl peptidase IV inhibitor | 1 | SL | [170-171]                                               |
| 8561 | dipeptidyl peptidase IV inhibitor (DPP IV inhibitor) | dipeptidyl peptidase IV inhibitor | 3 | GL | [83-84],[228-229],[316-317]                             |
| 8594 | dipeptidyl peptidase IV inhibitor (DPP IV inhibitor) | dipeptidyl peptidase IV inhibitor | 3 | VR | [75-76],[267-268],[489-490]                             |
| 8638 | dipeptidyl peptidase IV inhibitor (DPP IV inhibitor) | dipeptidyl peptidase IV inhibitor | 1 | PL | [449-450]                                               |
| 8677 | dipeptidyl peptidase IV inhibitor (DPP IV inhibitor) | dipeptidyl peptidase IV inhibitor | 1 | WL | [359-360]                                               |
| 8680 | dipeptidyl peptidase IV inhibitor (DPP IV inhibitor) | dipeptidyl peptidase IV inhibitor | 1 | WN | [379-380]                                               |
| 8687 | dipeptidyl peptidase IV inhibitor (DPP IV inhibitor) | dipeptidyl peptidase IV inhibitor | 2 | WS | [157-158],[281-282]                                     |
| 8696 | dipeptidyl peptidase IV inhibitor (DPP IV inhibitor) | dipeptidyl peptidase IV inhibitor | 1 | YT | [339-340]                                               |
| 8757 | dipeptidyl peptidase IV inhibitor (DPP IV inhibitor) | dipeptidyl peptidase IV inhibitor | 3 | AD | [239-240],[243-244],[336-337]                           |
| 8758 | dipeptidyl peptidase IV inhibitor (DPP IV inhibitor) | dipeptidyl peptidase IV inhibitor | 4 | AE | [52-53],[364-365],[394-395],[505-506]                   |
| 8759 | dipeptidyl peptidase IV inhibitor (DPP IV inhibitor) | dipeptidyl peptidase IV inhibitor | 3 | AF | [149-150],[245-246],[468-469]                           |
| 8760 | dipeptidyl peptidase IV inhibitor (DPP IV inhibitor) | dipeptidyl peptidase IV inhibitor | 6 | AG | [54-55],[70-71],[152-153],[191-192],[343-344],[451-452] |
| 8761 | dipeptidyl peptidase IV inhibitor (DPP IV inhibitor) | dipeptidyl peptidase IV inhibitor | 2 | AH | [155-156],[383-384]                                     |
| 8763 | dipeptidyl peptidase IV inhibitor (DPP IV inhibitor) | dipeptidyl peptidase IV inhibitor | 1 | AT | [466-467]                                               |
| 8764 | dipeptidyl peptidase IV inhibitor (DPP IV inhibitor) | dipeptidyl peptidase IV inhibitor | 2 | AV | [73-74],[424-425]                                       |
| 8766 | dipeptidyl peptidase IV inhibitor (DPP IV inhibitor) | dipeptidyl peptidase IV inhibitor | 2 | DN | [314-315],[400-401]                                     |
| 8767 | dipeptidyl peptidase IV inhibitor (DPP IV inhibitor) | dipeptidyl peptidase IV inhibitor | 2 | DP | [61-62],[332-333]                                       |
| 8768 | dipeptidyl peptidase IV inhibitor (DPP IV inhibitor) | dipeptidyl peptidase IV inhibitor | 1 | DQ | [182-183]                                               |
| 8769 | dipeptidyl peptidase IV inhibitor (DPP IV inhibitor) | dipeptidyl peptidase IV inhibitor | 1 | DR | [134-135]                                               |

|      |                                                      |                                   |   |    |                                                 |
|------|------------------------------------------------------|-----------------------------------|---|----|-------------------------------------------------|
| 8770 | dipeptidyl peptidase IV inhibitor (DPP IV inhibitor) | dipeptidyl peptidase IV inhibitor | 4 | EG | [144-145],[270-271],[413-414],[432-433]         |
| 8771 | dipeptidyl peptidase IV inhibitor (DPP IV inhibitor) | dipeptidyl peptidase IV inhibitor | 1 | EH | [221-222]                                       |
| 8773 | dipeptidyl peptidase IV inhibitor (DPP IV inhibitor) | dipeptidyl peptidase IV inhibitor | 5 | ES | [58-59],[118-119],[299-300],[301-302],[485-486] |
| 8774 | dipeptidyl peptidase IV inhibitor (DPP IV inhibitor) | dipeptidyl peptidase IV inhibitor | 3 | ET | [114-115],[251-252],[319-320]                   |
| 8775 | dipeptidyl peptidase IV inhibitor (DPP IV inhibitor) | dipeptidyl peptidase IV inhibitor | 3 | EV | [395-396],[463-464],[506-507]                   |
| 8776 | dipeptidyl peptidase IV inhibitor (DPP IV inhibitor) | dipeptidyl peptidase IV inhibitor | 1 | EW | [435-436]                                       |
| 8777 | dipeptidyl peptidase IV inhibitor (DPP IV inhibitor) | dipeptidyl peptidase IV inhibitor | 1 | EY | [205-206]                                       |
| 8778 | dipeptidyl peptidase IV inhibitor (DPP IV inhibitor) | dipeptidyl peptidase IV inhibitor | 3 | FN | [18-19],[246-247],[481-482]                     |
| 8779 | dipeptidyl peptidase IV inhibitor (DPP IV inhibitor) | dipeptidyl peptidase IV inhibitor | 3 | FQ | [67-68],[131-132],[469-470]                     |
| 8780 | dipeptidyl peptidase IV inhibitor (DPP IV inhibitor) | dipeptidyl peptidase IV inhibitor | 2 | FR | [142-143],[198-199]                             |
| 8781 | dipeptidyl peptidase IV inhibitor (DPP IV inhibitor) | dipeptidyl peptidase IV inhibitor | 1 | GE | [220-221]                                       |
| 8782 | dipeptidyl peptidase IV inhibitor (DPP IV inhibitor) | dipeptidyl peptidase IV inhibitor | 2 | GF | [236-237],[433-434]                             |
| 8783 | dipeptidyl peptidase IV inhibitor (DPP IV inhibitor) | dipeptidyl peptidase IV inhibitor | 2 | GG | [26-27],[310-311]                               |
| 8785 | dipeptidyl peptidase IV inhibitor (DPP IV inhibitor) | dipeptidyl peptidase IV inhibitor | 1 | GI | [103-104]                                       |
| 8786 | dipeptidyl peptidase IV inhibitor (DPP IV inhibitor) | dipeptidyl peptidase IV inhibitor | 4 | GV | [55-56],[71-72],[106-107],[153-154]             |
| 8791 | dipeptidyl peptidase IV inhibitor (DPP IV inhibitor) | dipeptidyl peptidase IV inhibitor | 1 | HF | [141-142]                                       |
| 8794 | dipeptidyl peptidase IV inhibitor (DPP IV inhibitor) | dipeptidyl peptidase IV inhibitor | 2 | HR | [209-210],[262-263]                             |
| 8795 | dipeptidyl peptidase IV inhibitor (DPP IV inhibitor) | dipeptidyl peptidase IV inhibitor | 1 | HS | [384-385]                                       |
| 8796 | dipeptidyl peptidase IV inhibitor (DPP IV inhibitor) | dipeptidyl peptidase IV inhibitor | 1 | HT | [352-353]                                       |
| 8798 | dipeptidyl peptidase IV inhibitor (DPP IV inhibitor) | dipeptidyl peptidase IV inhibitor | 2 | HW | [156-157],[378-379]                             |
| 8801 | dipeptidyl peptidase IV inhibitor (DPP IV inhibitor) | dipeptidyl peptidase IV inhibitor | 1 | II | [147-148]                                       |
| 8802 | dipeptidyl peptidase IV inhibitor (DPP IV inhibitor) | dipeptidyl peptidase IV inhibitor | 1 | IL | [5-6]                                           |
| 8806 | dipeptidyl peptidase IV inhibitor (DPP IV inhibitor) | dipeptidyl peptidase IV inhibitor | 3 | IR | [139-140],[277-278],[457-458]                   |
| 8808 | dipeptidyl peptidase IV inhibitor (DPP IV inhibitor) | dipeptidyl peptidase IV inhibitor | 1 | KE | [292-293]                                       |
| 8809 | dipeptidyl peptidase IV inhibitor (DPP IV inhibitor) | dipeptidyl peptidase IV inhibitor | 1 | KF | [480-481]                                       |
| 8812 | dipeptidyl peptidase IV inhibitor (DPP IV inhibitor) | dipeptidyl peptidase IV inhibitor | 1 | KI | [138-139]                                       |
| 8814 | dipeptidyl peptidase IV inhibitor (DPP IV inhibitor) | dipeptidyl peptidase IV inhibitor | 1 | KR | [427-428]                                       |
| 8816 | dipeptidyl peptidase IV inhibitor (DPP IV inhibitor) | dipeptidyl peptidase IV inhibitor | 1 | KT | [440-441]                                       |
| 8821 | dipeptidyl peptidase IV inhibitor (DPP IV inhibitor) | dipeptidyl peptidase IV inhibitor | 1 | LI | [13-14]                                         |
| 8823 | dipeptidyl peptidase IV inhibitor (DPP IV inhibitor) | dipeptidyl peptidase IV inhibitor | 2 | LN | [38-39],[381-382]                               |
| 8824 | dipeptidyl peptidase IV inhibitor (DPP IV inhibitor) | dipeptidyl peptidase IV inhibitor | 1 | LT | [417-418]                                       |
| 8825 | dipeptidyl peptidase IV inhibitor (DPP IV inhibitor) | dipeptidyl peptidase IV inhibitor | 2 | LV | [95-96],[488-489]                               |

|      |                                                      |                                   |    |    |                                                                                                                 |
|------|------------------------------------------------------|-----------------------------------|----|----|-----------------------------------------------------------------------------------------------------------------|
| 8837 | dipeptidyl peptidase IV inhibitor (DPP IV inhibitor) | dipeptidyl peptidase IV inhibitor | 1  | MV | [446-447]                                                                                                       |
| 8839 | dipeptidyl peptidase IV inhibitor (DPP IV inhibitor) | dipeptidyl peptidase IV inhibitor | 4  | NA | [91-92],[177-178],[382-383],[444-445]                                                                           |
| 8840 | dipeptidyl peptidase IV inhibitor (DPP IV inhibitor) | dipeptidyl peptidase IV inhibitor | 2  | ND | [160-161],[260-261]                                                                                             |
| 8841 | dipeptidyl peptidase IV inhibitor (DPP IV inhibitor) | dipeptidyl peptidase IV inhibitor | 2  | NE | [431-432],[442-443]                                                                                             |
| 8842 | dipeptidyl peptidase IV inhibitor (DPP IV inhibitor) | dipeptidyl peptidase IV inhibitor | 3  | NF | [187-188],[401-402],[422-423]                                                                                   |
| 8843 | dipeptidyl peptidase IV inhibitor (DPP IV inhibitor) | dipeptidyl peptidase IV inhibitor | 3  | NG | [19-20],[82-83],[315-316]                                                                                       |
| 8845 | dipeptidyl peptidase IV inhibitor (DPP IV inhibitor) | dipeptidyl peptidase IV inhibitor | 1  | NL | [380-381]                                                                                                       |
| 8847 | dipeptidyl peptidase IV inhibitor (DPP IV inhibitor) | dipeptidyl peptidase IV inhibitor | 4  | NN | [63-64],[175-176],[176-177],[231-232]                                                                           |
| 8848 | dipeptidyl peptidase IV inhibitor (DPP IV inhibitor) | dipeptidyl peptidase IV inhibitor | 2  | NQ | [64-65],[179-180]                                                                                               |
| 8849 | dipeptidyl peptidase IV inhibitor (DPP IV inhibitor) | dipeptidyl peptidase IV inhibitor | 3  | NR | [39-40],[48-49],[482-483]                                                                                       |
| 8851 | dipeptidyl peptidase IV inhibitor (DPP IV inhibitor) | dipeptidyl peptidase IV inhibitor | 2  | NV | [232-233],[247-248]                                                                                             |
| 8855 | dipeptidyl peptidase IV inhibitor (DPP IV inhibitor) | dipeptidyl peptidase IV inhibitor | 2  | PG | [110-111],[219-220]                                                                                             |
| 8856 | dipeptidyl peptidase IV inhibitor (DPP IV inhibitor) | dipeptidyl peptidase IV inhibitor | 1  | PH | [377-378]                                                                                                       |
| 8857 | dipeptidyl peptidase IV inhibitor (DPP IV inhibitor) | dipeptidyl peptidase IV inhibitor | 1  | PI | [4-5]                                                                                                           |
| 8860 | dipeptidyl peptidase IV inhibitor (DPP IV inhibitor) | dipeptidyl peptidase IV inhibitor | 2  | PN | [62-63],[81-82]                                                                                                 |
| 8861 | dipeptidyl peptidase IV inhibitor (DPP IV inhibitor) | dipeptidyl peptidase IV inhibitor | 4  | PQ | [87-88],[93-94],[200-201],[420-421]                                                                             |
| 8862 | dipeptidyl peptidase IV inhibitor (DPP IV inhibitor) | dipeptidyl peptidase IV inhibitor | 2  | PS | [333-334],[493-494]                                                                                             |
| 8863 | dipeptidyl peptidase IV inhibitor (DPP IV inhibitor) | dipeptidyl peptidase IV inhibitor | 1  | PT | [46-47]                                                                                                         |
| 8864 | dipeptidyl peptidase IV inhibitor (DPP IV inhibitor) | dipeptidyl peptidase IV inhibitor | 2  | PV | [165-166],[355-356]                                                                                             |
| 8868 | dipeptidyl peptidase IV inhibitor (DPP IV inhibitor) | dipeptidyl peptidase IV inhibitor | 1  | QD | [133-134]                                                                                                       |
| 8869 | dipeptidyl peptidase IV inhibitor (DPP IV inhibitor) | dipeptidyl peptidase IV inhibitor | 3  | QE | [204-205],[286-287],[484-485]                                                                                   |
| 8870 | dipeptidyl peptidase IV inhibitor (DPP IV inhibitor) | dipeptidyl peptidase IV inhibitor | 2  | QF | [32-33],[66-67]                                                                                                 |
| 8871 | dipeptidyl peptidase IV inhibitor (DPP IV inhibitor) | dipeptidyl peptidase IV inhibitor | 2  | QG | [125-126],[201-202]                                                                                             |
| 8872 | dipeptidyl peptidase IV inhibitor (DPP IV inhibitor) | dipeptidyl peptidase IV inhibitor | 1  | QH | [208-209]                                                                                                       |
| 8873 | dipeptidyl peptidase IV inhibitor (DPP IV inhibitor) | dipeptidyl peptidase IV inhibitor | 1  | QI | [470-471]                                                                                                       |
| 8874 | dipeptidyl peptidase IV inhibitor (DPP IV inhibitor) | dipeptidyl peptidase IV inhibitor | 6  | QL | [37-38],[94-95],[180-181],[273-274],[361-362],[415-416]                                                         |
| 8875 | dipeptidyl peptidase IV inhibitor (DPP IV inhibitor) | dipeptidyl peptidase IV inhibitor | 2  | QN | [183-184],[421-422]                                                                                             |
| 8876 | dipeptidyl peptidase IV inhibitor (DPP IV inhibitor) | dipeptidyl peptidase IV inhibitor | 12 | QQ | [29-30],[30-31],[31-32],[65-66],[124-125],[132-133],[203-204],[212-213],[213-214],[216-217],[224-225],[225-226] |
| 8877 | dipeptidyl peptidase IV inhibitor (DPP IV inhibitor) | dipeptidyl peptidase IV inhibitor | 5  | QS | [24-25],[122-123],[127-128],[257-258],[306-307]                                                                 |
| 8878 | dipeptidyl peptidase IV inhibitor (DPP IV inhibitor) | dipeptidyl peptidase IV inhibitor | 1  | QT | [404-405]                                                                                                       |
| 8879 | dipeptidyl peptidase IV inhibitor (DPP IV inhibitor) | dipeptidyl peptidase IV inhibitor | 2  | QV | [275-276],[397-398]                                                                                             |

|      |                                                      |                                   |   |    |                                                                               |
|------|------------------------------------------------------|-----------------------------------|---|----|-------------------------------------------------------------------------------|
| 8881 | dipeptidyl peptidase IV inhibitor (DPP IV inhibitor) | dipeptidyl peptidase IV inhibitor | 1 | QY | [88-89]                                                                       |
| 8882 | dipeptidyl peptidase IV inhibitor (DPP IV inhibitor) | dipeptidyl peptidase IV inhibitor | 6 | RG | [100-101],[102-103],[227-228],[309-310],[366-367],[391-392]                   |
| 8883 | dipeptidyl peptidase IV inhibitor (DPP IV inhibitor) | dipeptidyl peptidase IV inhibitor | 2 | RH | [135-136],[140-141]                                                           |
| 8884 | dipeptidyl peptidase IV inhibitor (DPP IV inhibitor) | dipeptidyl peptidase IV inhibitor | 2 | RI | [49-50],[345-346]                                                             |
| 8885 | dipeptidyl peptidase IV inhibitor (DPP IV inhibitor) | dipeptidyl peptidase IV inhibitor | 1 | RK | [291-292]                                                                     |
| 8886 | dipeptidyl peptidase IV inhibitor (DPP IV inhibitor) | dipeptidyl peptidase IV inhibitor | 4 | RL | [40-41],[255-256],[325-326],[478-479]                                         |
| 8888 | dipeptidyl peptidase IV inhibitor (DPP IV inhibitor) | dipeptidyl peptidase IV inhibitor | 2 | RN | [186-187],[430-431]                                                           |
| 8889 | dipeptidyl peptidase IV inhibitor (DPP IV inhibitor) | dipeptidyl peptidase IV inhibitor | 8 | RR | [76-77],[210-211],[254-255],[263-264],[304-305],[308-309],[477-478],[503-504] |
| 8890 | dipeptidyl peptidase IV inhibitor (DPP IV inhibitor) | dipeptidyl peptidase IV inhibitor | 2 | RW | [280-281],[358-359]                                                           |
| 8891 | dipeptidyl peptidase IV inhibitor (DPP IV inhibitor) | dipeptidyl peptidase IV inhibitor | 1 | SF | [438-439]                                                                     |
| 8892 | dipeptidyl peptidase IV inhibitor (DPP IV inhibitor) | dipeptidyl peptidase IV inhibitor | 1 | SH | [351-352]                                                                     |
| 8893 | dipeptidyl peptidase IV inhibitor (DPP IV inhibitor) | dipeptidyl peptidase IV inhibitor | 2 | SI | [8-9],[265-266]                                                               |
| 8895 | dipeptidyl peptidase IV inhibitor (DPP IV inhibitor) | dipeptidyl peptidase IV inhibitor | 1 | SV | [385-386]                                                                     |
| 8896 | dipeptidyl peptidase IV inhibitor (DPP IV inhibitor) | dipeptidyl peptidase IV inhibitor | 1 | SW | [59-60]                                                                       |
| 8897 | dipeptidyl peptidase IV inhibitor (DPP IV inhibitor) | dipeptidyl peptidase IV inhibitor | 1 | SY | [158-159]                                                                     |
| 8899 | dipeptidyl peptidase IV inhibitor (DPP IV inhibitor) | dipeptidyl peptidase IV inhibitor | 2 | TE | [250-251],[340-341]                                                           |
| 8900 | dipeptidyl peptidase IV inhibitor (DPP IV inhibitor) | dipeptidyl peptidase IV inhibitor | 1 | TF | [115-116]                                                                     |
| 8901 | dipeptidyl peptidase IV inhibitor (DPP IV inhibitor) | dipeptidyl peptidase IV inhibitor | 1 | TG | [105-106]                                                                     |
| 8903 | dipeptidyl peptidase IV inhibitor (DPP IV inhibitor) | dipeptidyl peptidase IV inhibitor | 3 | TI | [78-79],[320-321],[418-419]                                                   |
| 8905 | dipeptidyl peptidase IV inhibitor (DPP IV inhibitor) | dipeptidyl peptidase IV inhibitor | 3 | TL | [323-324],[353-354],[487-488]                                                 |
| 8907 | dipeptidyl peptidase IV inhibitor (DPP IV inhibitor) | dipeptidyl peptidase IV inhibitor | 3 | TN | [47-48],[174-175],[441-442]                                                   |
| 8910 | dipeptidyl peptidase IV inhibitor (DPP IV inhibitor) | dipeptidyl peptidase IV inhibitor | 1 | TS | [454-455]                                                                     |
| 8912 | dipeptidyl peptidase IV inhibitor (DPP IV inhibitor) | dipeptidyl peptidase IV inhibitor | 2 | TV | [348-349],[405-406]                                                           |
| 8915 | dipeptidyl peptidase IV inhibitor (DPP IV inhibitor) | dipeptidyl peptidase IV inhibitor | 2 | VD | [248-249],[399-400]                                                           |
| 8916 | dipeptidyl peptidase IV inhibitor (DPP IV inhibitor) | dipeptidyl peptidase IV inhibitor | 1 | VE | [269-270]                                                                     |
| 8917 | dipeptidyl peptidase IV inhibitor (DPP IV inhibitor) | dipeptidyl peptidase IV inhibitor | 2 | VF | [233-234],[406-407]                                                           |
| 8920 | dipeptidyl peptidase IV inhibitor (DPP IV inhibitor) | dipeptidyl peptidase IV inhibitor | 2 | VI | [56-57],[276-277]                                                             |
| 8921 | dipeptidyl peptidase IV inhibitor (DPP IV inhibitor) | dipeptidyl peptidase IV inhibitor | 1 | VK | [426-427]                                                                     |
| 8922 | dipeptidyl peptidase IV inhibitor (DPP IV inhibitor) | dipeptidyl peptidase IV inhibitor | 3 | VL | [107-108],[356-357],[464-465]                                                 |
| 8924 | dipeptidyl peptidase IV inhibitor (DPP IV inhibitor) | dipeptidyl peptidase IV inhibitor | 1 | VN | [349-350]                                                                     |
| 8925 | dipeptidyl peptidase IV inhibitor (DPP IV inhibitor) | dipeptidyl peptidase IV inhibitor | 1 | VQ | [396-397]                                                                     |
| 8926 | dipeptidyl peptidase IV inhibitor (DPP IV inhibitor) | dipeptidyl peptidase IV inhibitor | 2 | VS | [437-438],[447-448]                                                           |

|      |                                                      |                                    |   |     |                                                                               |
|------|------------------------------------------------------|------------------------------------|---|-----|-------------------------------------------------------------------------------|
| 8929 | dipeptidyl peptidase IV inhibitor (DPP IV inhibitor) | dipeptidyl peptidase IV inhibitor  | 2 | VY  | [96-97],[387-388]                                                             |
| 8930 | dipeptidyl peptidase IV inhibitor (DPP IV inhibitor) | dipeptidyl peptidase IV inhibitor  | 1 | WD  | [60-61]                                                                       |
| 8932 | dipeptidyl peptidase IV inhibitor (DPP IV inhibitor) | dipeptidyl peptidase IV inhibitor  | 1 | YA  | [388-389]                                                                     |
| 8934 | dipeptidyl peptidase IV inhibitor (DPP IV inhibitor) | dipeptidyl peptidase IV inhibitor  | 1 | YE  | [206-207]                                                                     |
| 8938 | dipeptidyl peptidase IV inhibitor (DPP IV inhibitor) | dipeptidyl peptidase IV inhibitor  | 1 | YI  | [97-98]                                                                       |
| 8940 | dipeptidyl peptidase IV inhibitor (DPP IV inhibitor) | dipeptidyl peptidase IV inhibitor  | 2 | YL  | [10-11],[189-190]                                                             |
| 8942 | dipeptidyl peptidase IV inhibitor (DPP IV inhibitor) | dipeptidyl peptidase IV inhibitor  | 1 | YN  | [159-160]                                                                     |
| 8945 | dipeptidyl peptidase IV inhibitor (DPP IV inhibitor) | dipeptidyl peptidase IV inhibitor  | 2 | YS  | [89-90],[370-371]                                                             |
| 8946 | dipeptidyl peptidase IV inhibitor (DPP IV inhibitor) | dipeptidyl peptidase IV inhibitor  | 1 | YV  | [375-376]                                                                     |
| 9339 | Dipeptidyl peptidase IV inhibitor                    | dipeptidyl peptidase IV inhibitor  | 1 | LPQ | [86-88]                                                                       |
| 9477 | DPP-III inhibitor                                    | dipeptidyl peptidase III inhibitor | 2 | RW  | [280-281],[358-359]                                                           |
| 9478 | DPP-III inhibitor                                    | dipeptidyl peptidase III inhibitor | 5 | LR  | [324-325],[326-327],[357-358],[390-391],[411-412]                             |
| 9482 | DPP-III inhibitor                                    | dipeptidyl peptidase III inhibitor | 2 | YL  | [10-11],[189-190]                                                             |
| 9485 | DPP-III inhibitor                                    | dipeptidyl peptidase III inhibitor | 8 | RR  | [76-77],[210-211],[254-255],[263-264],[304-305],[308-309],[477-478],[503-504] |
| 9486 | DPP-III inhibitor                                    | dipeptidyl peptidase III inhibitor | 1 | TF  | [115-116]                                                                     |
| 9487 | DPP-III inhibitor                                    | dipeptidyl peptidase III inhibitor | 1 | GE  | [220-221]                                                                     |
| 9488 | DPP-III inhibitor                                    | dipeptidyl peptidase III inhibitor | 2 | GF  | [236-237],[433-434]                                                           |
| 9489 | DPP-III inhibitor                                    | dipeptidyl peptidase III inhibitor | 3 | PR  | [185-186],[279-280],[472-473]                                                 |
| 9491 | DPP-III inhibitor                                    | dipeptidyl peptidase III inhibitor | 1 | RV  | [268-269]                                                                     |
| 9492 | DPP-III inhibitor                                    | dipeptidyl peptidase III inhibitor | 5 | DA  | [42-43],[238-239],[244-245],[372-373],[475-476]                               |
| 9495 | DPP-III inhibitor                                    | dipeptidyl peptidase III inhibitor | 1 | HF  | [141-142]                                                                     |
| 9499 | DPP-III inhibitor                                    | dipeptidyl peptidase III inhibitor | 5 | LA  | [22-23],[190-191],[242-243],[450-451],[465-466]                               |
| 9500 | DPP-III inhibitor                                    | dipeptidyl peptidase III inhibitor | 1 | FA  | [423-424]                                                                     |
| 9501 | DPP-III inhibitor                                    | dipeptidyl peptidase III inhibitor | 2 | FR  | [142-143],[198-199]                                                           |
| 9502 | DPP-III inhibitor                                    | dipeptidyl peptidase III inhibitor | 2 | FL  | [12-13],[241-242]                                                             |
| 9504 | DPP-III inhibitor                                    | dipeptidyl peptidase III inhibitor | 2 | PE  | [113-114],[461-462]                                                           |
| 9509 | DPP-III inhibitor                                    | dipeptidyl peptidase III inhibitor | 2 | VY  | [96-97],[387-388]                                                             |
| 9510 | DPP-III inhibitor                                    | dipeptidyl peptidase III inhibitor | 1 | YI  | [97-98]                                                                       |
| 8247 | CaMPDE inhibitor                                     | CaMPDE inhibitor                   | 3 | IR  | [139-140],[277-278],[457-458]                                                 |
| 8249 | CaMPDE inhibitor                                     | CaMPDE inhibitor                   | 1 | KF  | [480-481]                                                                     |
| 8250 | CaMPDE inhibitor                                     | CaMPDE inhibitor                   | 2 | EF  | [130-131],[197-198]                                                           |
| 2842 | Renin inhibitor                                      | renin inhibitor                    | 5 | LR  | [324-325],[326-327],[357-358],[390-391],[411-412]                             |



|      |                 |                 |   |      |                               |
|------|-----------------|-----------------|---|------|-------------------------------|
| 8246 | renin inhibitor | renin inhibitor | 3 | IR   | [139-140],[277-278],[457-458] |
| 8248 | Renin inhibitor | renin inhibitor | 1 | KF   | [480-481]                     |
| 8251 | Renin inhibitor | renin inhibitor | 2 | EF   | [130-131],[197-198]           |
| 9430 | Renin inhibitor | renin inhibitor | 3 | NR   | [39-40],[48-49],[482-483]     |
| 9431 | Renin inhibitor | renin inhibitor | 2 | QF   | [32-33],[66-67]               |
| 9432 | Renin inhibitor | renin inhibitor | 1 | SF   | [438-439]                     |
| 9433 | Renin inhibitor | renin inhibitor | 1 | YA   | [388-389]                     |
| 9469 | Renin inhibitor | renin inhibitor | 1 | RALP | [458-461]                     |
| 9470 | Renin inhibitor | renin inhibitor | 2 | LY   | [369-370],[374-375]           |
| 9471 | Renin inhibitor | renin inhibitor | 1 | TF   | [115-116]                     |

Table S17. Profile of potential biological activity of fragments of protein Pis v 1.0101.

| ID   | Name of peptide                           | Activity      | Number | Sequence | Location                |
|------|-------------------------------------------|---------------|--------|----------|-------------------------|
| 3381 | ACE inhibitor                             | ACE inhibitor | 1      | LY       | [121-122]               |
| 3383 | ACE inhibitor                             | ACE inhibitor | 1      | IY       | [22-23]                 |
| 3388 | ACE inhibitor                             | ACE inhibitor | 1      | MY       | [55-56]                 |
| 3421 | ACE inhibitor                             | ACE inhibitor | 1      | LVL      | [4-6]                   |
| 3488 | ACE inhibitor from sake lees              | ACE inhibitor | 1      | YW       | [146-147]               |
| 3537 | ACE inhibitor                             | ACE inhibitor | 1      | PR       | [129-130]               |
| 3539 | ACE inhibitor from alpha-zein             | ACE inhibitor | 1      | LAA      | [16-18]                 |
| 7558 | ACE inhibitor from buckwheat              | ACE inhibitor | 1      | VK       | [104-105]               |
| 7583 | ACE inhibitor                             | ACE inhibitor | 2      | AF       | [10-11],[12-13]         |
| 7585 | ACE inhibitor                             | ACE inhibitor | 1      | LA       | [16-17]                 |
| 7586 | ACE inhibitor                             | ACE inhibitor | 1      | KR       | [105-106]               |
| 7588 | ACE inhibitor                             | ACE inhibitor | 1      | RA       | [24-25]                 |
| 7590 | ACE inhibitor                             | ACE inhibitor | 1      | AA       | [17-18]                 |
| 7592 | ACE inhibitor                             | ACE inhibitor | 1      | FR       | [113-114]               |
| 7601 | ACE inhibitor                             | ACE inhibitor | 1      | GH       | [67-68]                 |
| 7610 | ACE inhibitor                             | ACE inhibitor | 2      | GQ       | [37-38],[111-112]       |
| 7615 | ACE inhibitor                             | ACE inhibitor | 2      | GE       | [31-32],[115-116]       |
| 7617 | ACE inhibitor                             | ACE inhibitor | 2      | QG       | [110-111],[138-139]     |
| 7618 | ACE inhibitor                             | ACE inhibitor | 1      | SG       | [36-37]                 |
| 7622 | ACE inhibitor                             | ACE inhibitor | 1      | EG       | [30-31]                 |
| 7680 | ACE inhibitor from pea vicilin            | ACE inhibitor | 3      | QK       | [41-42],[48-49],[62-63] |
| 7681 | ACE inhibitor from soy                    | ACE inhibitor | 1      | DG       | [66-67]                 |
| 7684 | ACE inhibitor from garlic                 | ACE inhibitor | 1      | SY       | [148-149]               |
| 7692 | ACE inhibitor                             | ACE inhibitor | 1      | KF       | [49-50]                 |
| 7693 | ACE inhibitor from wakame                 | ACE inhibitor | 2      | KL       | [3-4],[117-118]         |
| 7742 | ACE inhibitor                             | ACE inhibitor | 1      | AR       | [72-73]                 |
| 7751 | ACE inhibitor from shark meat hydrolysate | ACE inhibitor | 1      | CF       | [80-81]                 |
| 7828 | ACE inhibitor                             | ACE inhibitor | 3      | EV       | [28-29],[60-61],[90-91] |
| 7829 | ACE inhibitor                             | ACE inhibitor | 2      | VE       | [27-28],[29-30]         |

|      |                                                                      |                                           |   |     |                             |
|------|----------------------------------------------------------------------|-------------------------------------------|---|-----|-----------------------------|
| 7831 | ACE inhibitor                                                        | ACE inhibitor                             | 2 | LQ  | [88-89],[118-119]           |
| 7840 | ACE inhibitor                                                        | ACE inhibitor                             | 1 | EK  | [116-117]                   |
| 9042 | ACE inhibitor                                                        | ACE inhibitor                             | 1 | AFL | [12-14]                     |
| 9077 | ACE inhibitor                                                        | ACE inhibitor                             | 1 | YV  | [56-57]                     |
| 9078 | ACE inhibitor                                                        | ACE inhibitor                             | 1 | YE  | [122-123]                   |
| 9079 | ACE inhibitor                                                        | ACE inhibitor                             | 1 | IL  | [15-16]                     |
| 9173 | ACE inhibitor                                                        | ACE inhibitor                             | 1 | RG  | [114-115]                   |
| 9473 | ACE inhibitor                                                        | ACE inhibitor                             | 1 | GHS | [67-69]                     |
| 3356 | Stimulating vasoactive substance release                             | stimulating                               | 1 | LLL | [6-8]                       |
| 8320 | Glucose uptake stimulating peptide                                   | stimulating                               | 1 | VL  | [5-6]                       |
| 8321 | Glucose uptake stimulating peptide                                   | stimulating                               | 1 | LV  | [4-5]                       |
| 8323 | Glucose uptake stimulating peptide                                   | stimulating                               | 1 | IL  | [15-16]                     |
| 8324 | Glucose uptake stimulating peptide                                   | stimulating                               | 1 | LI  | [14-15]                     |
| 8326 | Glucose uptake stimulating peptide                                   | stimulating                               | 2 | LL  | [6-7],[7-8]                 |
| 8329 | Stimulating vasoactive substance release                             | stimulating                               | 1 | EE  | [45-46]                     |
| 8330 | Stimulating vasoactive substance release                             | stimulating                               | 1 | SE  | [126-127]                   |
| 2890 | neuropeptide                                                         | neuropeptide                              | 2 | GQ  | [37-38],[111-112]           |
| 9534 | Kyotorphin                                                           | neuropeptide                              | 1 | YR  | [23-24]                     |
| 7872 | peptide from soybean protein isolates: beta-conglycinin and glycinin | antioxidative                             | 1 | LY  | [121-122]                   |
| 7873 | peptide from soybean protein isolates: beta-conglycinin and glycinin | antioxidative                             | 1 | IY  | [22-23]                     |
| 7888 | antioxidative peptide                                                | antioxidative                             | 3 | EL  | [87-88],[120-121],[127-128] |
| 8090 | peptide derived from sardine muscle                                  | antioxidative                             | 1 | MY  | [55-56]                     |
| 3751 |                                                                      | bacterial permease ligand                 | 1 | KK  | [93-94]                     |
| 9472 | Renin inhibitor                                                      | hypotensive                               | 1 | GHS | [67-69]                     |
| 4005 |                                                                      | activating ubiquitin-mediated proteolysis | 1 | RA  | [24-25]                     |
| 4006 | Ubiquitin-mediated proteolysis activating peptide                    | activating ubiquitin-mediated proteolysis | 1 | LA  | [16-17]                     |
| 9693 | Alpha-glucosidase inhibitor                                          | alpha-glucosidase inhibitor               | 2 | VE  | [27-28],[29-30]             |
| 3173 | dipeptidyl peptidase IV inhibitor (DPP IV inhibitor)                 | dipeptidyl peptidase IV inhibitor         | 1 | MA  | [1-2]                       |
| 3175 | dipeptidyl peptidase IV inhibitor (DPP IV inhibitor)                 | dipeptidyl peptidase IV inhibitor         | 1 | LA  | [16-17]                     |
| 3176 | dipeptidyl peptidase IV inhibitor (DPP IV inhibitor)                 | dipeptidyl peptidase IV inhibitor         | 1 | FA  | [11-12]                     |
| 3180 | dipeptidyl peptidase IV inhibitor (DPP IV inhibitor)                 | dipeptidyl peptidase IV inhibitor         | 1 | LP  | [128-129]                   |
| 3182 | dipeptidyl peptidase IV inhibitor (DPP IV inhibitor)                 | dipeptidyl peptidase IV inhibitor         | 2 | LL  | [6-7],[7-8]                 |

|      |                                                      |                                   |   |    |                         |
|------|------------------------------------------------------|-----------------------------------|---|----|-------------------------|
| 8505 | Dipeptidyl peptidase IV inhibitor (DPP IV inhibitor) | dipeptidyl peptidase IV inhibitor | 2 | SP | [135-136],[144-145]     |
| 8526 | dipeptidyl peptidase IV inhibitor (DPP IV inhibitor) | dipeptidyl peptidase IV inhibitor | 1 | RA | [24-25]                 |
| 8531 | dipeptidyl peptidase IV inhibitor (DPP IV inhibitor) | dipeptidyl peptidase IV inhibitor | 2 | TA | [71-72],[124-125]       |
| 8555 | dipeptidyl peptidase IV inhibitor (DPP IV inhibitor) | dipeptidyl peptidase IV inhibitor | 1 | FL | [13-14]                 |
| 8558 | dipeptidyl peptidase IV inhibitor (DPP IV inhibitor) | dipeptidyl peptidase IV inhibitor | 1 | EK | [116-117]               |
| 8560 | dipeptidyl peptidase IV inhibitor (DPP IV inhibitor) | dipeptidyl peptidase IV inhibitor | 1 | SL | [69-70]                 |
| 8637 | dipeptidyl peptidase IV inhibitor (DPP IV inhibitor) | dipeptidyl peptidase IV inhibitor | 1 | AA | [17-18]                 |
| 8687 | dipeptidyl peptidase IV inhibitor (DPP IV inhibitor) | dipeptidyl peptidase IV inhibitor | 1 | WS | [147-148]               |
| 8759 | dipeptidyl peptidase IV inhibitor (DPP IV inhibitor) | dipeptidyl peptidase IV inhibitor | 2 | AF | [10-11],[12-13]         |
| 8762 | dipeptidyl peptidase IV inhibitor (DPP IV inhibitor) | dipeptidyl peptidase IV inhibitor | 2 | AS | [20-21],[125-126]       |
| 8763 | dipeptidyl peptidase IV inhibitor (DPP IV inhibitor) | dipeptidyl peptidase IV inhibitor | 1 | AT | [25-26]                 |
| 8770 | dipeptidyl peptidase IV inhibitor (DPP IV inhibitor) | dipeptidyl peptidase IV inhibitor | 1 | EG | [30-31]                 |
| 8774 | dipeptidyl peptidase IV inhibitor (DPP IV inhibitor) | dipeptidyl peptidase IV inhibitor | 1 | ET | [123-124]               |
| 8775 | dipeptidyl peptidase IV inhibitor (DPP IV inhibitor) | dipeptidyl peptidase IV inhibitor | 3 | EV | [28-29],[60-61],[90-91] |
| 8780 | dipeptidyl peptidase IV inhibitor (DPP IV inhibitor) | dipeptidyl peptidase IV inhibitor | 1 | FR | [113-114]               |
| 8781 | dipeptidyl peptidase IV inhibitor (DPP IV inhibitor) | dipeptidyl peptidase IV inhibitor | 2 | GE | [31-32],[115-116]       |
| 8784 | dipeptidyl peptidase IV inhibitor (DPP IV inhibitor) | dipeptidyl peptidase IV inhibitor | 1 | GH | [67-68]                 |
| 8795 | dipeptidyl peptidase IV inhibitor (DPP IV inhibitor) | dipeptidyl peptidase IV inhibitor | 1 | HS | [68-69]                 |
| 8802 | dipeptidyl peptidase IV inhibitor (DPP IV inhibitor) | dipeptidyl peptidase IV inhibitor | 1 | IL | [15-16]                 |
| 8804 | dipeptidyl peptidase IV inhibitor (DPP IV inhibitor) | dipeptidyl peptidase IV inhibitor | 1 | IN | [74-75]                 |
| 8809 | dipeptidyl peptidase IV inhibitor (DPP IV inhibitor) | dipeptidyl peptidase IV inhibitor | 1 | KF | [49-50]                 |
| 8811 | dipeptidyl peptidase IV inhibitor (DPP IV inhibitor) | dipeptidyl peptidase IV inhibitor | 1 | KH | [51-52]                 |
| 8813 | dipeptidyl peptidase IV inhibitor (DPP IV inhibitor) | dipeptidyl peptidase IV inhibitor | 1 | KK | [93-94]                 |
| 8814 | dipeptidyl peptidase IV inhibitor (DPP IV inhibitor) | dipeptidyl peptidase IV inhibitor | 1 | KR | [105-106]               |
| 8815 | dipeptidyl peptidase IV inhibitor (DPP IV inhibitor) | dipeptidyl peptidase IV inhibitor | 1 | KS | [63-64]                 |
| 8821 | dipeptidyl peptidase IV inhibitor (DPP IV inhibitor) | dipeptidyl peptidase IV inhibitor | 1 | LI | [14-15]                 |
| 8824 | dipeptidyl peptidase IV inhibitor (DPP IV inhibitor) | dipeptidyl peptidase IV inhibitor | 1 | LT | [70-71]                 |
| 8825 | dipeptidyl peptidase IV inhibitor (DPP IV inhibitor) | dipeptidyl peptidase IV inhibitor | 1 | LV | [4-5]                   |
| 8837 | dipeptidyl peptidase IV inhibitor (DPP IV inhibitor) | dipeptidyl peptidase IV inhibitor | 1 | MV | [103-104]               |
| 8838 | dipeptidyl peptidase IV inhibitor (DPP IV inhibitor) | dipeptidyl peptidase IV inhibitor | 1 | MY | [55-56]                 |
| 8839 | dipeptidyl peptidase IV inhibitor (DPP IV inhibitor) | dipeptidyl peptidase IV inhibitor | 1 | NA | [19-20]                 |
| 8845 | dipeptidyl peptidase IV inhibitor (DPP IV inhibitor) | dipeptidyl peptidase IV inhibitor | 2 | NL | [33-34],[99-100]        |

|      |                                                      |                                    |   |    |                                                       |
|------|------------------------------------------------------|------------------------------------|---|----|-------------------------------------------------------|
| 8848 | dipeptidyl peptidase IV inhibitor (DPP IV inhibitor) | dipeptidyl peptidase IV inhibitor  | 1 | NQ | [75-76]                                               |
| 8862 | dipeptidyl peptidase IV inhibitor (DPP IV inhibitor) | dipeptidyl peptidase IV inhibitor  | 1 | PS | [136-137]                                             |
| 8866 | dipeptidyl peptidase IV inhibitor (DPP IV inhibitor) | dipeptidyl peptidase IV inhibitor  | 1 | PY | [145-146]                                             |
| 8868 | dipeptidyl peptidase IV inhibitor (DPP IV inhibitor) | dipeptidyl peptidase IV inhibitor  | 1 | QD | [65-66]                                               |
| 8869 | dipeptidyl peptidase IV inhibitor (DPP IV inhibitor) | dipeptidyl peptidase IV inhibitor  | 4 | QE | [59-60],[86-87],[89-90],[119-120]                     |
| 8870 | dipeptidyl peptidase IV inhibitor (DPP IV inhibitor) | dipeptidyl peptidase IV inhibitor  | 3 | QF | [43-44],[112-113],[141-142]                           |
| 8871 | dipeptidyl peptidase IV inhibitor (DPP IV inhibitor) | dipeptidyl peptidase IV inhibitor  | 2 | QG | [110-111],[138-139]                                   |
| 8875 | dipeptidyl peptidase IV inhibitor (DPP IV inhibitor) | dipeptidyl peptidase IV inhibitor  | 1 | QN | [98-99]                                               |
| 8876 | dipeptidyl peptidase IV inhibitor (DPP IV inhibitor) | dipeptidyl peptidase IV inhibitor  | 6 | QQ | [47-48],[58-59],[78-79],[107-108],[108-109],[109-110] |
| 8877 | dipeptidyl peptidase IV inhibitor (DPP IV inhibitor) | dipeptidyl peptidase IV inhibitor  | 1 | QS | [38-39]                                               |
| 8882 | dipeptidyl peptidase IV inhibitor (DPP IV inhibitor) | dipeptidyl peptidase IV inhibitor  | 1 | RG | [114-115]                                             |
| 8884 | dipeptidyl peptidase IV inhibitor (DPP IV inhibitor) | dipeptidyl peptidase IV inhibitor  | 1 | RI | [73-74]                                               |
| 8887 | dipeptidyl peptidase IV inhibitor (DPP IV inhibitor) | dipeptidyl peptidase IV inhibitor  | 1 | RM | [130-131]                                             |
| 8893 | dipeptidyl peptidase IV inhibitor (DPP IV inhibitor) | dipeptidyl peptidase IV inhibitor  | 1 | SI | [21-22]                                               |
| 8897 | dipeptidyl peptidase IV inhibitor (DPP IV inhibitor) | dipeptidyl peptidase IV inhibitor  | 1 | SY | [148-149]                                             |
| 8912 | dipeptidyl peptidase IV inhibitor (DPP IV inhibitor) | dipeptidyl peptidase IV inhibitor  | 1 | TV | [26-27]                                               |
| 8915 | dipeptidyl peptidase IV inhibitor (DPP IV inhibitor) | dipeptidyl peptidase IV inhibitor  | 1 | VD | [91-92]                                               |
| 8916 | dipeptidyl peptidase IV inhibitor (DPP IV inhibitor) | dipeptidyl peptidase IV inhibitor  | 2 | VE | [27-28],[29-30]                                       |
| 8921 | dipeptidyl peptidase IV inhibitor (DPP IV inhibitor) | dipeptidyl peptidase IV inhibitor  | 1 | VK | [104-105]                                             |
| 8922 | dipeptidyl peptidase IV inhibitor (DPP IV inhibitor) | dipeptidyl peptidase IV inhibitor  | 1 | VL | [5-6]                                                 |
| 8925 | dipeptidyl peptidase IV inhibitor (DPP IV inhibitor) | dipeptidyl peptidase IV inhibitor  | 2 | VQ | [57-58],[61-62]                                       |
| 8934 | dipeptidyl peptidase IV inhibitor (DPP IV inhibitor) | dipeptidyl peptidase IV inhibitor  | 1 | YE | [122-123]                                             |
| 8944 | dipeptidyl peptidase IV inhibitor (DPP IV inhibitor) | dipeptidyl peptidase IV inhibitor  | 1 | YR | [23-24]                                               |
| 8946 | dipeptidyl peptidase IV inhibitor (DPP IV inhibitor) | dipeptidyl peptidase IV inhibitor  | 1 | YV | [56-57]                                               |
| 8947 | dipeptidyl peptidase IV inhibitor (DPP IV inhibitor) | dipeptidyl peptidase IV inhibitor  | 1 | YW | [146-147]                                             |
| 9484 | DPP-III inhibitor                                    | dipeptidyl peptidase III inhibitor | 1 | YR | [23-24]                                               |
| 9487 | DPP-III inhibitor                                    | dipeptidyl peptidase III inhibitor | 2 | GE | [31-32],[115-116]                                     |
| 9489 | DPP-III inhibitor                                    | dipeptidyl peptidase III inhibitor | 1 | PR | [129-130]                                             |
| 9499 | DPP-III inhibitor                                    | dipeptidyl peptidase III inhibitor | 1 | LA | [16-17]                                               |
| 9500 | DPP-III inhibitor                                    | dipeptidyl peptidase III inhibitor | 1 | FA | [11-12]                                               |
| 9501 | DPP-III inhibitor                                    | dipeptidyl peptidase III inhibitor | 1 | FR | [113-114]                                             |
| 9502 | DPP-III inhibitor                                    | dipeptidyl peptidase III inhibitor | 1 | FL | [13-14]                                               |

|      |                  |                  |   |    |                             |
|------|------------------|------------------|---|----|-----------------------------|
| 8249 | CaMPDE inhibitor | CaMPDE inhibitor | 1 | KF | [49-50]                     |
| 8248 | Renin inhibitor  | renin inhibitor  | 1 | KF | [49-50]                     |
| 9431 | Renin inhibitor  | renin inhibitor  | 3 | QF | [43-44],[112-113],[141-142] |
| 9470 | Renin inhibitor  | renin inhibitor  | 1 | LY | [121-122]                   |

Table S18. Profile of potential biological activity of fragments of protein Pis v 2.0101.

| ID   | Name of peptide                           | Activity      | Number | Sequence | Location                                          |
|------|-------------------------------------------|---------------|--------|----------|---------------------------------------------------|
| 3460 | Prolyl endopeptidase inhibitor            | antiamnestic  | 2      | PG       | [117-118],[472-473]                               |
| 3257 | beta-lactokinin                           | ACE inhibitor | 2      | RL       | [254-255],[459-460]                               |
| 3258 | beta-lactokinin                           | ACE inhibitor | 1      | IR       | [392-393]                                         |
| 3379 | ACE inhibitor                             | ACE inhibitor | 1      | AKK      | [345-347]                                         |
| 3383 | ACE inhibitor                             | ACE inhibitor | 1      | IY       | [165-166]                                         |
| 3384 | ACE inhibitor                             | ACE inhibitor | 4      | VF       | [81-82],[115-116],[387-388],[437-438]             |
| 3393 | ACE inhibitor                             | ACE inhibitor | 1      | FAP      | [470-472]                                         |
| 3404 | ACE inhibitor                             | ACE inhibitor | 1      | VRP      | [146-148]                                         |
| 3421 | ACE inhibitor                             | ACE inhibitor | 1      | LVL      | [173-175]                                         |
| 3489 | ACE inhibitor from sake lees              | ACE inhibitor | 2      | RF       | [38-39],[339-340]                                 |
| 3492 | ACE inhibitor from sake                   | ACE inhibitor | 3      | VY       | [103-104],[319-320],[368-369]                     |
| 3502 | ACE inhibitor (BSA fr. 221-222)           | ACE inhibitor | 1      | FP       | [116-117]                                         |
| 3532 | ACE inhibitor                             | ACE inhibitor | 1      | GY       | [2-3]                                             |
| 3537 | ACE inhibitor                             | ACE inhibitor | 1      | PR       | [322-323]                                         |
| 3541 | ACE inhibitor                             | ACE inhibitor | 1      | LSP      | [275-277]                                         |
| 3551 | ACE inhibitor (from bovine beta-Lg)       | ACE inhibitor | 1      | LF       | [16-17]                                           |
| 7502 | ACE inhibitor                             | ACE inhibitor | 1      | IVR      | [265-267]                                         |
| 7513 | ACE inhibitor from Alaskan pollack skin   | ACE inhibitor | 1      | PL       | [442-443]                                         |
| 7541 | ACE inhibitor from wheat germ hydrolysate | ACE inhibitor | 1      | IVY      | [367-369]                                         |
| 7558 | ACE inhibitor from buckwheat              | ACE inhibitor | 1      | VK       | [407-408]                                         |
| 7559 | ACE inhibitor from buckwheat              | ACE inhibitor | 1      | PSY      | [94-96]                                           |
| 7562 | ACE inhibitor from soy hydrolysate        | ACE inhibitor | 1      | IA       | [155-156]                                         |
| 7570 | ACE inhibitor from chicken muscle         | ACE inhibitor | 1      | LAP      | [356-358]                                         |
| 7582 | ACE inhibitor                             | ACE inhibitor | 1      | RP       | [147-148]                                         |
| 7583 | ACE inhibitor                             | ACE inhibitor | 1      | AF       | [235-236]                                         |
| 7584 | ACE inhibitor                             | ACE inhibitor | 3      | AP       | [99-100],[357-358],[471-472]                      |
| 7585 | ACE inhibitor                             | ACE inhibitor | 5      | LA       | [178-179],[241-242],[251-252],[356-357],[431-432] |
| 7586 | ACE inhibitor                             | ACE inhibitor | 3      | KR       | [54-55],[259-260],[408-409]                       |
| 7587 | ACE inhibitor                             | ACE inhibitor | 2      | VP       | [93-94],[400-401]                                 |

|      |                                     |               |   |     |                                                   |
|------|-------------------------------------|---------------|---|-----|---------------------------------------------------|
| 7588 | ACE inhibitor                       | ACE inhibitor | 3 | RA  | [316-317],[409-410],[439-440]                     |
| 7591 | ACE inhibitor                       | ACE inhibitor | 1 | GF  | [12-13]                                           |
| 7592 | ACE inhibitor                       | ACE inhibitor | 2 | FR  | [82-83],[438-439]                                 |
| 7593 | ACE inhibitor                       | ACE inhibitor | 1 | IF  | [469-470]                                         |
| 7594 | ACE inhibitor                       | ACE inhibitor | 1 | VG  | [181-182]                                         |
| 7596 | ACE inhibitor                       | ACE inhibitor | 2 | GI  | [110-111],[263-264]                               |
| 7598 | ACE inhibitor                       | ACE inhibitor | 1 | GA  | [113-114]                                         |
| 7599 | ACE inhibitor                       | ACE inhibitor | 3 | GL  | [90-91],[297-298],[424-425]                       |
| 7600 | ACE inhibitor                       | ACE inhibitor | 3 | AG  | [61-62],[159-160],[432-433]                       |
| 7603 | ACE inhibitor                       | ACE inhibitor | 3 | GR  | [325-326],[375-376],[433-434]                     |
| 7604 | ACE inhibitor                       | ACE inhibitor | 1 | KG  | [347-348]                                         |
| 7606 | ACE inhibitor                       | ACE inhibitor | 2 | DA  | [353-354],[456-457]                               |
| 7607 | ACE inhibitor                       | ACE inhibitor | 4 | GS  | [108-109],[199-200],[207-208],[473-474]           |
| 7608 | ACE inhibitor                       | ACE inhibitor | 3 | GV  | [62-63],[160-161],[348-349]                       |
| 7609 | ACE inhibitor                       | ACE inhibitor | 1 | MG  | [1-2]                                             |
| 7610 | ACE inhibitor                       | ACE inhibitor | 5 | GQ  | [169-170],[209-210],[223-224],[226-227],[395-396] |
| 7614 | ACE inhibitor                       | ACE inhibitor | 1 | HG  | [112-113]                                         |
| 7615 | ACE inhibitor                       | ACE inhibitor | 2 | GE  | [140-141],[384-385]                               |
| 7616 | ACE inhibitor                       | ACE inhibitor | 2 | GG  | [198-199],[324-325]                               |
| 7617 | ACE inhibitor                       | ACE inhibitor | 3 | QG  | [107-108],[206-207],[225-226]                     |
| 7618 | ACE inhibitor                       | ACE inhibitor | 3 | SG  | [109-110],[139-140],[208-209]                     |
| 7619 | ACE inhibitor                       | ACE inhibitor | 2 | LG  | [11-12],[197-198]                                 |
| 7620 | ACE inhibitor                       | ACE inhibitor | 1 | GD  | [152-153]                                         |
| 7622 | ACE inhibitor                       | ACE inhibitor | 2 | EG  | [151-152],[394-395]                               |
| 7623 | ACE inhibitor                       | ACE inhibitor | 1 | EA  | [60-61]                                           |
| 7624 | ACE inhibitor                       | ACE inhibitor | 5 | NG  | [168-169],[296-297],[374-375],[383-384],[423-424] |
| 7625 | ACE inhibitor                       | ACE inhibitor | 2 | PG  | [117-118],[472-473]                               |
| 7628 | ACE inhibitor from k-CN (fr. 67-68) | ACE inhibitor | 2 | VR  | [146-147],[266-267]                               |
| 7635 | ACE inhibitor from k-CN (fr. 51-53) | ACE inhibitor | 1 | VAV | [79-81]                                           |
| 7680 | ACE inhibitor from pea vicilin      | ACE inhibitor | 2 | QK  | [144-145],[256-257]                               |
| 7683 | ACE inhibitor from garlic           | ACE inhibitor | 1 | NF  | [403-404]                                         |
| 7684 | ACE inhibitor from garlic           | ACE inhibitor | 1 | SY  | [95-96]                                           |



|      |                                           |               |   |      |                                                 |
|------|-------------------------------------------|---------------|---|------|-------------------------------------------------|
| 7685 | ACE inhibitor from garlic                 | ACE inhibitor | 5 | SF   | [8-9],[20-21],[244-245],[419-420],[449-450]     |
| 7691 | ACE inhibitor from wakame                 | ACE inhibitor | 1 | KY   | [308-309]                                       |
| 7692 | ACE inhibitor                             | ACE inhibitor | 2 | KF   | [194-195],[414-415]                             |
| 7693 | ACE inhibitor from wakame                 | ACE inhibitor | 1 | KL   | [172-173]                                       |
| 7741 | ACE inhibitor                             | ACE inhibitor | 5 | RR   | [55-56],[221-222],[253-254],[292-293],[458-459] |
| 7742 | ACE inhibitor                             | ACE inhibitor | 2 | AR   | [252-253],[457-458]                             |
| 7752 | ACE inhibitor from shark meat hydrolysate | ACE inhibitor | 1 | EY   | [285-286]                                       |
| 7807 | ACE inhibitor from caprine b-Lg           | ACE inhibitor | 1 | LLF  | [15-17]                                         |
| 7826 | ACE inhibitor                             | ACE inhibitor | 4 | EI   | [204-205],[239-240],[391-392],[494-495]         |
| 7827 | ACE inhibitor                             | ACE inhibitor | 2 | IE   | [24-25],[57-58]                                 |
| 7828 | ACE inhibitor                             | ACE inhibitor | 1 | EV   | [273-274]                                       |
| 7830 | ACE inhibitor                             | ACE inhibitor | 1 | TE   | [64-65]                                         |
| 7831 | ACE inhibitor                             | ACE inhibitor | 3 | LQ   | [74-75],[255-256],[341-342]                     |
| 7832 | ACE inhibitor                             | ACE inhibitor | 2 | LN   | [48-49],[333-334]                               |
| 7834 | ACE inhibitor                             | ACE inhibitor | 2 | TQ   | [41-42],[249-250]                               |
| 7835 | ACE inhibitor                             | ACE inhibitor | 2 | AH   | [162-163],[364-365]                             |
| 7837 | ACE inhibitor                             | ACE inhibitor | 2 | PQ   | [201-202],[401-402]                             |
| 7838 | ACE inhibitor                             | ACE inhibitor | 1 | EW   | [416-417]                                       |
| 7840 | ACE inhibitor                             | ACE inhibitor | 1 | EK   | [258-259]                                       |
| 7841 | ACE inhibitor                             | ACE inhibitor | 2 | KE   | [257-258],[461-462]                             |
| 7843 | ACE inhibitor                             | ACE inhibitor | 2 | PH   | [277-278],[358-359]                             |
| 8182 | ACE Inhibitor                             | ACE inhibitor | 1 | ALEP | [50-53]                                         |
| 8185 | ACE inhibitor                             | ACE inhibitor | 2 | TF   | [122-123],[301-302]                             |
| 8193 | ACE inhibitor                             | ACE inhibitor | 1 | AI   | [354-355]                                       |
| 8402 | ACE inhibitor                             | ACE inhibitor | 1 | LVY  | [102-104]                                       |
| 8951 | ACE inhibitor                             | ACE inhibitor | 3 | AV   | [80-81],[114-115],[405-406]                     |
| 9029 | ACE inhibitor                             | ACE inhibitor | 2 | ALP  | [156-158],[440-442]                             |
| 9031 | ACE inhibitor                             | ACE inhibitor | 1 | LEE  | [298-300]                                       |
| 9076 | ACE inhibitor                             | ACE inhibitor | 2 | FQ   | [39-40],[123-124]                               |
| 9077 | ACE inhibitor                             | ACE inhibitor | 1 | YV   | [104-105]                                       |
| 9078 | ACE inhibitor                             | ACE inhibitor | 1 | YE   | [286-287]                                       |
| 9079 | ACE inhibitor                             | ACE inhibitor | 4 | IL   | [232-233],[240-241],[337-338],[355-356]         |

|      |                                                                      |                   |   |       |                                                                               |
|------|----------------------------------------------------------------------|-------------------|---|-------|-------------------------------------------------------------------------------|
| 9173 | ACE inhibitor                                                        | ACE inhibitor     | 5 | RG    | [89-90],[222-223],[262-263],[323-324],[372-373]                               |
| 9185 | ACE inhibitor                                                        | ACE inhibitor     | 3 | YN    | [166-167],[309-310],[320-321]                                                 |
| 9196 | ACE inhibitor                                                        | ACE inhibitor     | 1 | AVV   | [405-407]                                                                     |
| 9213 | ACE inhibitor                                                        | ACE inhibitor     | 2 | LR    | [192-193],[338-339]                                                           |
| 9468 | ACE inhibitor                                                        | ACE inhibitor     | 1 | RALP  | [439-442]                                                                     |
| 9708 | ACE inhibitor                                                        | ACE inhibitor     | 1 | LPILR | [335-339]                                                                     |
| 9730 | ACE inhibitor                                                        | ACE inhibitor     | 1 | NPR   | [321-323]                                                                     |
| 9742 | ACE inhibitor                                                        | ACE inhibitor     | 1 | EKR   | [258-260]                                                                     |
| 3285 | Antithrombotic peptide                                               | antithrombotic    | 2 | PG    | [117-118],[472-473]                                                           |
| 3354 | Antithrombotic peptide                                               | antithrombotic    | 2 | DEE   | [237-239],[389-391]                                                           |
| 3351 | Stimulating vasoactive substance release                             | stimulating       | 1 | EEE   | [287-289]                                                                     |
| 3355 | Stimulating vasoactive substance release                             | stimulating       | 1 | SSS   | [474-476]                                                                     |
| 3356 | Stimulating vasoactive substance release                             | stimulating       | 1 | LLL   | [14-16]                                                                       |
| 8320 | Glucose uptake stimulating peptide                                   | stimulating       | 4 | VL    | [174-175],[196-197],[274-275],[349-350]                                       |
| 8321 | Glucose uptake stimulating peptide                                   | stimulating       | 5 | LV    | [92-93],[102-103],[173-174],[175-176],[397-398]                               |
| 8322 | Glucose uptake stimulating peptide                                   | stimulating       | 3 | IV    | [265-266],[367-368],[379-380]                                                 |
| 8323 | Glucose uptake stimulating peptide                                   | stimulating       | 4 | IL    | [232-233],[240-241],[337-338],[355-356]                                       |
| 8325 | Glucose uptake stimulating peptide                                   | stimulating       | 1 | II    | [264-265]                                                                     |
| 8326 | Glucose uptake stimulating peptide                                   | stimulating       | 4 | LL    | [6-7],[14-15],[15-16],[91-92]                                                 |
| 8329 | Stimulating vasoactive substance release                             | stimulating       | 8 | EE    | [71-72],[125-126],[238-239],[287-288],[288-289],[299-300],[390-391],[491-492] |
| 8330 | Stimulating vasoactive substance release                             | stimulating       | 6 | SE    | [59-60],[133-134],[184-185],[381-382],[465-466],[482-483]                     |
| 3061 | Immunostimulating peptide                                            | immunostimulating | 1 | GFL   | [12-14]                                                                       |
| 2890 | neuropeptide                                                         | neuropeptide      | 5 | GQ    | [169-170],[209-210],[223-224],[226-227],[395-396]                             |
| 8310 | Anxiolytic peptide                                                   | neuropeptide      | 1 | YL    | [191-192]                                                                     |
| 2737 | Peptide regulating phosphoinositol metabolism                        | regulating        | 1 | GFL   | [12-14]                                                                       |
| 2754 | peptide regulating the stomach mucosal membrane activity             | regulating        | 2 | PG    | [117-118],[472-473]                                                           |
| 8318 | Dvl protein binding                                                  | anticancer        | 1 | VVV   | [398-400]                                                                     |
| 3305 |                                                                      | antioxidative     | 1 | LH    | [350-351]                                                                     |
| 7873 | peptide from soybean protein isolates: beta-conglycinin and glycinin | antioxidative     | 1 | IY    | [165-166]                                                                     |
| 7886 | peptide derived from egg white albumin                               | antioxidative     | 2 | AH    | [162-163],[364-365]                                                           |
| 7888 | antioxidative peptide                                                | antioxidative     | 1 | EL    | [101-102]                                                                     |

|      |                                                      |                                           |   |       |                                                   |
|------|------------------------------------------------------|-------------------------------------------|---|-------|---------------------------------------------------|
| 7999 | synthetic peptide                                    | antioxidative                             | 1 | LHR   | [350-352]                                         |
| 8033 | synthetic peptide                                    | antioxidative                             | 1 | PHR   | [277-279]                                         |
| 8037 | synthetic peptide                                    | antioxidative                             | 1 | PHW   | [358-360]                                         |
| 8067 | synthetic peptide                                    | antioxidative                             | 1 | RHT   | [83-85]                                           |
| 8139 | synthetic peptide                                    | antioxidative                             | 1 | PEL   | [100-102]                                         |
| 8215 | Antioxidative peptide                                | antioxidative                             | 1 | IR    | [392-393]                                         |
| 8217 | Antioxidative peptide                                | antioxidative                             | 2 | LK    | [307-308],[460-461]                               |
| 8224 | antioxidative peptide                                | antioxidative                             | 3 | VY    | [103-104],[319-320],[368-369]                     |
| 9342 | Antioxidative peptide                                | antioxidative                             | 1 | FC    | [302-303]                                         |
| 9361 | Antioxidative peptide                                | antioxidative                             | 1 | VYV   | [103-105]                                         |
| 9716 | Antioxidative peptide                                | antioxidative                             | 1 | LPILR | [335-339]                                         |
| 3751 |                                                      | bacterial permease ligand                 | 1 | KK    | [346-347]                                         |
| 8661 | Hypotensive peptide                                  | hypotensive                               | 1 | LPILR | [335-339]                                         |
| 4005 |                                                      | activating ubiquitin-mediated proteolysis | 3 | RA    | [316-317],[409-410],[439-440]                     |
| 4006 | Ubiquitin-mediated proteolysis activating peptide    | activating ubiquitin-mediated proteolysis | 5 | LA    | [178-179],[241-242],[251-252],[356-357],[431-432] |
| 9580 | Hypolipidemic peptide                                | hypolipidemic                             | 1 | EF    | [65-66]                                           |
| 9650 | Alpha-glucosidase inhibitor                          | alpha-glucosidase inhibitor               | 1 | EA    | [60-61]                                           |
| 9694 | Alpha-glucosidase inhibitor                          | alpha-glucosidase inhibitor               | 2 | PE    | [100-101],[120-121]                               |
| 9695 | Alpha-glucosidase inhibitor                          | alpha-glucosidase inhibitor               | 2 | AD    | [179-180],[317-318]                               |
| 3172 | dipeptidyl peptidase IV inhibitor (DPP IV inhibitor) | dipeptidyl peptidase IV inhibitor         | 3 | VA    | [79-80],[161-162],[176-177]                       |
| 3175 | dipeptidyl peptidase IV inhibitor (DPP IV inhibitor) | dipeptidyl peptidase IV inhibitor         | 5 | LA    | [178-179],[241-242],[251-252],[356-357],[431-432] |
| 3176 | dipeptidyl peptidase IV inhibitor (DPP IV inhibitor) | dipeptidyl peptidase IV inhibitor         | 3 | FA    | [21-22],[404-405],[470-471]                       |
| 3177 | dipeptidyl peptidase IV inhibitor (DPP IV inhibitor) | dipeptidyl peptidase IV inhibitor         | 3 | AP    | [99-100],[357-358],[471-472]                      |
| 3179 | dipeptidyl peptidase IV inhibitor (DPP IV inhibitor) | dipeptidyl peptidase IV inhibitor         | 1 | PA    | [158-159]                                         |
| 3180 | dipeptidyl peptidase IV inhibitor (DPP IV inhibitor) | dipeptidyl peptidase IV inhibitor         | 3 | LP    | [157-158],[335-336],[441-442]                     |
| 3181 | dipeptidyl peptidase IV inhibitor (DPP IV inhibitor) | dipeptidyl peptidase IV inhibitor         | 2 | VP    | [93-94],[400-401]                                 |
| 3182 | dipeptidyl peptidase IV inhibitor (DPP IV inhibitor) | dipeptidyl peptidase IV inhibitor         | 4 | LL    | [6-7],[14-15],[15-16],[91-92]                     |
| 3183 | dipeptidyl peptidase IV inhibitor (DPP IV inhibitor) | dipeptidyl peptidase IV inhibitor         | 5 | VV    | [27-28],[105-106],[398-399],[399-400],[406-407]   |
| 8500 | dipeptidyl peptidase IV inhibitor (DPP IV inhibitor) | dipeptidyl peptidase IV inhibitor         | 1 | APG   | [471-473]                                         |
| 8505 | Dipeptidyl peptidase IV inhibitor (DPP IV inhibitor) | dipeptidyl peptidase IV inhibitor         | 2 | SP    | [200-201],[276-277]                               |
| 8506 | dipeptidyl peptidase IV inhibitor (DPP IV inhibitor) | dipeptidyl peptidase IV inhibitor         | 1 | FP    | [116-117]                                         |

|      |                                                      |                                   |   |      |                                                 |
|------|------------------------------------------------------|-----------------------------------|---|------|-------------------------------------------------|
| 8518 | dipeptidyl peptidase IV inhibitor (DPP IV inhibitor) | dipeptidyl peptidase IV inhibitor | 1 | RP   | [147-148]                                       |
| 8524 | dipeptidyl peptidase IV inhibitor (DPP IV inhibitor) | dipeptidyl peptidase IV inhibitor | 1 | GA   | [113-114]                                       |
| 8525 | dipeptidyl peptidase IV inhibitor (DPP IV inhibitor) | dipeptidyl peptidase IV inhibitor | 1 | IA   | [155-156]                                       |
| 8526 | dipeptidyl peptidase IV inhibitor (DPP IV inhibitor) | dipeptidyl peptidase IV inhibitor | 3 | RA   | [316-317],[409-410],[439-440]                   |
| 8529 | dipeptidyl peptidase IV inhibitor (DPP IV inhibitor) | dipeptidyl peptidase IV inhibitor | 1 | EP   | [52-53]                                         |
| 8530 | dipeptidyl peptidase IV inhibitor (DPP IV inhibitor) | dipeptidyl peptidase IV inhibitor | 1 | NP   | [321-322]                                       |
| 8555 | dipeptidyl peptidase IV inhibitor (DPP IV inhibitor) | dipeptidyl peptidase IV inhibitor | 2 | FL   | [13-14],[340-341]                               |
| 8556 | dipeptidyl peptidase IV inhibitor (DPP IV inhibitor) | dipeptidyl peptidase IV inhibitor | 1 | WV   | [417-418]                                       |
| 8558 | dipeptidyl peptidase IV inhibitor (DPP IV inhibitor) | dipeptidyl peptidase IV inhibitor | 1 | EK   | [258-259]                                       |
| 8559 | dipeptidyl peptidase IV inhibitor (DPP IV inhibitor) | dipeptidyl peptidase IV inhibitor | 5 | AL   | [50-51],[156-157],[177-178],[332-333],[440-441] |
| 8560 | dipeptidyl peptidase IV inhibitor (DPP IV inhibitor) | dipeptidyl peptidase IV inhibitor | 2 | SL   | [5-6],[10-11]                                   |
| 8561 | dipeptidyl peptidase IV inhibitor (DPP IV inhibitor) | dipeptidyl peptidase IV inhibitor | 3 | GL   | [90-91],[297-298],[424-425]                     |
| 8594 | dipeptidyl peptidase IV inhibitor (DPP IV inhibitor) | dipeptidyl peptidase IV inhibitor | 2 | VR   | [146-147],[266-267]                             |
| 8616 | dipeptidyl peptidase IV inhibitor (DPP IV inhibitor) | dipeptidyl peptidase IV inhibitor | 1 | LPL  | [441-443]                                       |
| 8638 | dipeptidyl peptidase IV inhibitor (DPP IV inhibitor) | dipeptidyl peptidase IV inhibitor | 1 | PL   | [442-443]                                       |
| 8647 | dipeptidyl peptidase IV inhibitor (DPP IV inhibitor) | dipeptidyl peptidase IV inhibitor | 1 | ILAP | [355-358]                                       |
| 8679 | dipeptidyl peptidase IV inhibitor (DPP IV inhibitor) | dipeptidyl peptidase IV inhibitor | 1 | WI   | [164-165]                                       |
| 8680 | dipeptidyl peptidase IV inhibitor (DPP IV inhibitor) | dipeptidyl peptidase IV inhibitor | 1 | WN   | [360-361]                                       |
| 8757 | dipeptidyl peptidase IV inhibitor (DPP IV inhibitor) | dipeptidyl peptidase IV inhibitor | 2 | AD   | [179-180],[317-318]                             |
| 8759 | dipeptidyl peptidase IV inhibitor (DPP IV inhibitor) | dipeptidyl peptidase IV inhibitor | 1 | AF   | [235-236]                                       |
| 8760 | dipeptidyl peptidase IV inhibitor (DPP IV inhibitor) | dipeptidyl peptidase IV inhibitor | 3 | AG   | [61-62],[159-160],[432-433]                     |
| 8761 | dipeptidyl peptidase IV inhibitor (DPP IV inhibitor) | dipeptidyl peptidase IV inhibitor | 2 | AH   | [162-163],[364-365]                             |
| 8762 | dipeptidyl peptidase IV inhibitor (DPP IV inhibitor) | dipeptidyl peptidase IV inhibitor | 1 | AS   | [410-411]                                       |
| 8764 | dipeptidyl peptidase IV inhibitor (DPP IV inhibitor) | dipeptidyl peptidase IV inhibitor | 3 | AV   | [80-81],[114-115],[405-406]                     |
| 8766 | dipeptidyl peptidase IV inhibitor (DPP IV inhibitor) | dipeptidyl peptidase IV inhibitor | 1 | DN   | [97-98]                                         |
| 8767 | dipeptidyl peptidase IV inhibitor (DPP IV inhibitor) | dipeptidyl peptidase IV inhibitor | 1 | DP   | [313-314]                                       |
| 8768 | dipeptidyl peptidase IV inhibitor (DPP IV inhibitor) | dipeptidyl peptidase IV inhibitor | 2 | DQ   | [68-69],[189-190]                               |
| 8770 | dipeptidyl peptidase IV inhibitor (DPP IV inhibitor) | dipeptidyl peptidase IV inhibitor | 2 | EG   | [151-152],[394-395]                             |
| 8772 | dipeptidyl peptidase IV inhibitor (DPP IV inhibitor) | dipeptidyl peptidase IV inhibitor | 4 | EI   | [204-205],[239-240],[391-392],[494-495]         |
| 8773 | dipeptidyl peptidase IV inhibitor (DPP IV inhibitor) | dipeptidyl peptidase IV inhibitor | 4 | ES   | [58-59],[126-127],[385-386],[462-463]           |
| 8774 | dipeptidyl peptidase IV inhibitor (DPP IV inhibitor) | dipeptidyl peptidase IV inhibitor | 3 | ET   | [121-122],[300-301],[466-467]                   |
| 8775 | dipeptidyl peptidase IV inhibitor (DPP IV inhibitor) | dipeptidyl peptidase IV inhibitor | 1 | EV   | [273-274]                                       |

|      |                                                      |                                   |   |    |                                               |
|------|------------------------------------------------------|-----------------------------------|---|----|-----------------------------------------------|
| 8776 | dipeptidyl peptidase IV inhibitor (DPP IV inhibitor) | dipeptidyl peptidase IV inhibitor | 1 | EW | [416-417]                                     |
| 8777 | dipeptidyl peptidase IV inhibitor (DPP IV inhibitor) | dipeptidyl peptidase IV inhibitor | 1 | EY | [285-286]                                     |
| 8778 | dipeptidyl peptidase IV inhibitor (DPP IV inhibitor) | dipeptidyl peptidase IV inhibitor | 1 | FN | [245-246]                                     |
| 8779 | dipeptidyl peptidase IV inhibitor (DPP IV inhibitor) | dipeptidyl peptidase IV inhibitor | 2 | FQ | [39-40],[123-124]                             |
| 8780 | dipeptidyl peptidase IV inhibitor (DPP IV inhibitor) | dipeptidyl peptidase IV inhibitor | 2 | FR | [82-83],[438-439]                             |
| 8781 | dipeptidyl peptidase IV inhibitor (DPP IV inhibitor) | dipeptidyl peptidase IV inhibitor | 2 | GE | [140-141],[384-385]                           |
| 8782 | dipeptidyl peptidase IV inhibitor (DPP IV inhibitor) | dipeptidyl peptidase IV inhibitor | 1 | GF | [12-13]                                       |
| 8783 | dipeptidyl peptidase IV inhibitor (DPP IV inhibitor) | dipeptidyl peptidase IV inhibitor | 2 | GG | [198-199],[324-325]                           |
| 8785 | dipeptidyl peptidase IV inhibitor (DPP IV inhibitor) | dipeptidyl peptidase IV inhibitor | 2 | GI | [110-111],[263-264]                           |
| 8786 | dipeptidyl peptidase IV inhibitor (DPP IV inhibitor) | dipeptidyl peptidase IV inhibitor | 3 | GV | [62-63],[160-161],[348-349]                   |
| 8788 | dipeptidyl peptidase IV inhibitor (DPP IV inhibitor) | dipeptidyl peptidase IV inhibitor | 1 | GY | [2-3]                                         |
| 8794 | dipeptidyl peptidase IV inhibitor (DPP IV inhibitor) | dipeptidyl peptidase IV inhibitor | 2 | HR | [278-279],[351-352]                           |
| 8795 | dipeptidyl peptidase IV inhibitor (DPP IV inhibitor) | dipeptidyl peptidase IV inhibitor | 1 | HS | [365-366]                                     |
| 8796 | dipeptidyl peptidase IV inhibitor (DPP IV inhibitor) | dipeptidyl peptidase IV inhibitor | 1 | HT | [84-85]                                       |
| 8798 | dipeptidyl peptidase IV inhibitor (DPP IV inhibitor) | dipeptidyl peptidase IV inhibitor | 2 | HW | [163-164],[359-360]                           |
| 8800 | dipeptidyl peptidase IV inhibitor (DPP IV inhibitor) | dipeptidyl peptidase IV inhibitor | 2 | IH | [111-112],[495-496]                           |
| 8801 | dipeptidyl peptidase IV inhibitor (DPP IV inhibitor) | dipeptidyl peptidase IV inhibitor | 1 | II | [264-265]                                     |
| 8802 | dipeptidyl peptidase IV inhibitor (DPP IV inhibitor) | dipeptidyl peptidase IV inhibitor | 4 | IL | [232-233],[240-241],[337-338],[355-356]       |
| 8804 | dipeptidyl peptidase IV inhibitor (DPP IV inhibitor) | dipeptidyl peptidase IV inhibitor | 1 | IN | [311-312]                                     |
| 8805 | dipeptidyl peptidase IV inhibitor (DPP IV inhibitor) | dipeptidyl peptidase IV inhibitor | 5 | IQ | [45-46],[86-87],[149-150],[205-206],[377-378] |
| 8806 | dipeptidyl peptidase IV inhibitor (DPP IV inhibitor) | dipeptidyl peptidase IV inhibitor | 1 | IR | [392-393]                                     |
| 8808 | dipeptidyl peptidase IV inhibitor (DPP IV inhibitor) | dipeptidyl peptidase IV inhibitor | 2 | KE | [257-258],[461-462]                           |
| 8809 | dipeptidyl peptidase IV inhibitor (DPP IV inhibitor) | dipeptidyl peptidase IV inhibitor | 2 | KF | [194-195],[414-415]                           |
| 8810 | dipeptidyl peptidase IV inhibitor (DPP IV inhibitor) | dipeptidyl peptidase IV inhibitor | 1 | KG | [347-348]                                     |
| 8813 | dipeptidyl peptidase IV inhibitor (DPP IV inhibitor) | dipeptidyl peptidase IV inhibitor | 1 | KK | [346-347]                                     |
| 8814 | dipeptidyl peptidase IV inhibitor (DPP IV inhibitor) | dipeptidyl peptidase IV inhibitor | 3 | KR | [54-55],[259-260],[408-409]                   |
| 8815 | dipeptidyl peptidase IV inhibitor (DPP IV inhibitor) | dipeptidyl peptidase IV inhibitor | 1 | KS | [479-480]                                     |
| 8816 | dipeptidyl peptidase IV inhibitor (DPP IV inhibitor) | dipeptidyl peptidase IV inhibitor | 1 | KT | [421-422]                                     |
| 8817 | dipeptidyl peptidase IV inhibitor (DPP IV inhibitor) | dipeptidyl peptidase IV inhibitor | 1 | KV | [145-146]                                     |
| 8819 | dipeptidyl peptidase IV inhibitor (DPP IV inhibitor) | dipeptidyl peptidase IV inhibitor | 1 | KY | [308-309]                                     |
| 8820 | dipeptidyl peptidase IV inhibitor (DPP IV inhibitor) | dipeptidyl peptidase IV inhibitor | 1 | LH | [350-351]                                     |
| 8823 | dipeptidyl peptidase IV inhibitor (DPP IV inhibitor) | dipeptidyl peptidase IV inhibitor | 2 | LN | [48-49],[333-334]                             |

|      |                                                      |                                   |    |    |                                                                                                   |
|------|------------------------------------------------------|-----------------------------------|----|----|---------------------------------------------------------------------------------------------------|
| 8825 | dipeptidyl peptidase IV inhibitor (DPP IV inhibitor) | dipeptidyl peptidase IV inhibitor | 5  | LV | [92-93],[102-103],[173-174],[175-176],[397-398]                                                   |
| 8828 | dipeptidyl peptidase IV inhibitor (DPP IV inhibitor) | dipeptidyl peptidase IV inhibitor | 1  | MG | [1-2]                                                                                             |
| 8839 | dipeptidyl peptidase IV inhibitor (DPP IV inhibitor) | dipeptidyl peptidase IV inhibitor | 4  | NA | [49-50],[98-99],[331-332],[363-364]                                                               |
| 8840 | dipeptidyl peptidase IV inhibitor (DPP IV inhibitor) | dipeptidyl peptidase IV inhibitor | 1  | ND | [312-313]                                                                                         |
| 8841 | dipeptidyl peptidase IV inhibitor (DPP IV inhibitor) | dipeptidyl peptidase IV inhibitor | 1  | NE | [70-71]                                                                                           |
| 8842 | dipeptidyl peptidase IV inhibitor (DPP IV inhibitor) | dipeptidyl peptidase IV inhibitor | 1  | NF | [403-404]                                                                                         |
| 8843 | dipeptidyl peptidase IV inhibitor (DPP IV inhibitor) | dipeptidyl peptidase IV inhibitor | 5  | NG | [168-169],[296-297],[374-375],[383-384],[423-424]                                                 |
| 8845 | dipeptidyl peptidase IV inhibitor (DPP IV inhibitor) | dipeptidyl peptidase IV inhibitor | 2  | NL | [47-48],[334-335]                                                                                 |
| 8847 | dipeptidyl peptidase IV inhibitor (DPP IV inhibitor) | dipeptidyl peptidase IV inhibitor | 2  | NN | [167-168],[230-231]                                                                               |
| 8848 | dipeptidyl peptidase IV inhibitor (DPP IV inhibitor) | dipeptidyl peptidase IV inhibitor | 1  | NQ | [186-187]                                                                                         |
| 8851 | dipeptidyl peptidase IV inhibitor (DPP IV inhibitor) | dipeptidyl peptidase IV inhibitor | 2  | NV | [78-79],[361-362]                                                                                 |
| 8855 | dipeptidyl peptidase IV inhibitor (DPP IV inhibitor) | dipeptidyl peptidase IV inhibitor | 2  | PG | [117-118],[472-473]                                                                               |
| 8856 | dipeptidyl peptidase IV inhibitor (DPP IV inhibitor) | dipeptidyl peptidase IV inhibitor | 2  | PH | [277-278],[358-359]                                                                               |
| 8857 | dipeptidyl peptidase IV inhibitor (DPP IV inhibitor) | dipeptidyl peptidase IV inhibitor | 2  | PI | [148-149],[336-337]                                                                               |
| 8858 | dipeptidyl peptidase IV inhibitor (DPP IV inhibitor) | dipeptidyl peptidase IV inhibitor | 1  | PK | [53-54]                                                                                           |
| 8861 | dipeptidyl peptidase IV inhibitor (DPP IV inhibitor) | dipeptidyl peptidase IV inhibitor | 2  | PQ | [201-202],[401-402]                                                                               |
| 8862 | dipeptidyl peptidase IV inhibitor (DPP IV inhibitor) | dipeptidyl peptidase IV inhibitor | 2  | PS | [94-95],[314-315]                                                                                 |
| 8869 | dipeptidyl peptidase IV inhibitor (DPP IV inhibitor) | dipeptidyl peptidase IV inhibitor | 7  | QE | [124-125],[150-151],[203-204],[269-270],[280-281],[282-283],[284-285]                             |
| 8871 | dipeptidyl peptidase IV inhibitor (DPP IV inhibitor) | dipeptidyl peptidase IV inhibitor | 3  | QG | [107-108],[206-207],[225-226]                                                                     |
| 8872 | dipeptidyl peptidase IV inhibitor (DPP IV inhibitor) | dipeptidyl peptidase IV inhibitor | 1  | QH | [142-143]                                                                                         |
| 8873 | dipeptidyl peptidase IV inhibitor (DPP IV inhibitor) | dipeptidyl peptidase IV inhibitor | 3  | QI | [23-24],[44-45],[378-379]                                                                         |
| 8874 | dipeptidyl peptidase IV inhibitor (DPP IV inhibitor) | dipeptidyl peptidase IV inhibitor | 6  | QL | [73-74],[187-188],[250-251],[342-343],[396-397],[430-431]                                         |
| 8875 | dipeptidyl peptidase IV inhibitor (DPP IV inhibitor) | dipeptidyl peptidase IV inhibitor | 3  | QN | [46-47],[69-70],[402-403]                                                                         |
| 8876 | dipeptidyl peptidase IV inhibitor (DPP IV inhibitor) | dipeptidyl peptidase IV inhibitor | 8  | QQ | [31-32],[34-35],[35-36],[36-37],[137-138],[202-203],[224-225],[227-228]                           |
| 8877 | dipeptidyl peptidase IV inhibitor (DPP IV inhibitor) | dipeptidyl peptidase IV inhibitor | 10 | QS | [87-88],[128-129],[138-139],[170-171],[210-211],[216-217],[218-219],[228-229],[243-244],[481-482] |
| 8878 | dipeptidyl peptidase IV inhibitor (DPP IV inhibitor) | dipeptidyl peptidase IV inhibitor | 2  | QT | [40-41],[427-428]                                                                                 |
| 8879 | dipeptidyl peptidase IV inhibitor (DPP IV inhibitor) | dipeptidyl peptidase IV inhibitor | 1  | QV | [26-27]                                                                                           |
| 8881 | dipeptidyl peptidase IV inhibitor (DPP IV inhibitor) | dipeptidyl peptidase IV inhibitor | 1  | QY | [190-191]                                                                                         |
| 8882 | dipeptidyl peptidase IV inhibitor (DPP IV inhibitor) | dipeptidyl peptidase IV inhibitor | 5  | RG | [89-90],[222-223],[262-263],[323-324],[372-373]                                                   |
| 8883 | dipeptidyl peptidase IV inhibitor (DPP IV inhibitor) | dipeptidyl peptidase IV inhibitor | 1  | RH | [83-84]                                                                                           |
| 8884 | dipeptidyl peptidase IV inhibitor (DPP IV inhibitor) | dipeptidyl peptidase IV inhibitor | 2  | RI | [56-57],[376-377]                                                                                 |

|      |                                                      |                                   |   |    |                                                 |
|------|------------------------------------------------------|-----------------------------------|---|----|-------------------------------------------------|
| 8885 | dipeptidyl peptidase IV inhibitor (DPP IV inhibitor) | dipeptidyl peptidase IV inhibitor | 2 | RK | [193-194],[478-479]                             |
| 8886 | dipeptidyl peptidase IV inhibitor (DPP IV inhibitor) | dipeptidyl peptidase IV inhibitor | 2 | RL | [254-255],[459-460]                             |
| 8888 | dipeptidyl peptidase IV inhibitor (DPP IV inhibitor) | dipeptidyl peptidase IV inhibitor | 1 | RN | [295-296]                                       |
| 8889 | dipeptidyl peptidase IV inhibitor (DPP IV inhibitor) | dipeptidyl peptidase IV inhibitor | 5 | RR | [55-56],[221-222],[253-254],[292-293],[458-459] |
| 8891 | dipeptidyl peptidase IV inhibitor (DPP IV inhibitor) | dipeptidyl peptidase IV inhibitor | 5 | SF | [8-9],[20-21],[244-245],[419-420],[449-450]     |
| 8893 | dipeptidyl peptidase IV inhibitor (DPP IV inhibitor) | dipeptidyl peptidase IV inhibitor | 1 | SI | [366-367]                                       |
| 8894 | dipeptidyl peptidase IV inhibitor (DPP IV inhibitor) | dipeptidyl peptidase IV inhibitor | 1 | SK | [171-172]                                       |
| 8895 | dipeptidyl peptidase IV inhibitor (DPP IV inhibitor) | dipeptidyl peptidase IV inhibitor | 3 | SV | [329-330],[386-387],[436-437]                   |
| 8897 | dipeptidyl peptidase IV inhibitor (DPP IV inhibitor) | dipeptidyl peptidase IV inhibitor | 1 | SY | [95-96]                                         |
| 8899 | dipeptidyl peptidase IV inhibitor (DPP IV inhibitor) | dipeptidyl peptidase IV inhibitor | 1 | TE | [64-65]                                         |
| 8900 | dipeptidyl peptidase IV inhibitor (DPP IV inhibitor) | dipeptidyl peptidase IV inhibitor | 2 | TF | [122-123],[301-302]                             |
| 8903 | dipeptidyl peptidase IV inhibitor (DPP IV inhibitor) | dipeptidyl peptidase IV inhibitor | 2 | TI | [85-86],[468-469]                               |
| 8905 | dipeptidyl peptidase IV inhibitor (DPP IV inhibitor) | dipeptidyl peptidase IV inhibitor | 1 | TL | [306-307]                                       |
| 8906 | dipeptidyl peptidase IV inhibitor (DPP IV inhibitor) | dipeptidyl peptidase IV inhibitor | 1 | TM | [304-305]                                       |
| 8907 | dipeptidyl peptidase IV inhibitor (DPP IV inhibitor) | dipeptidyl peptidase IV inhibitor | 1 | TN | [422-423]                                       |
| 8908 | dipeptidyl peptidase IV inhibitor (DPP IV inhibitor) | dipeptidyl peptidase IV inhibitor | 2 | TQ | [41-42],[249-250]                               |
| 8909 | dipeptidyl peptidase IV inhibitor (DPP IV inhibitor) | dipeptidyl peptidase IV inhibitor | 1 | TR | [371-372]                                       |
| 8910 | dipeptidyl peptidase IV inhibitor (DPP IV inhibitor) | dipeptidyl peptidase IV inhibitor | 1 | TS | [428-429]                                       |
| 8911 | dipeptidyl peptidase IV inhibitor (DPP IV inhibitor) | dipeptidyl peptidase IV inhibitor | 1 | TT | [467-468]                                       |
| 8917 | dipeptidyl peptidase IV inhibitor (DPP IV inhibitor) | dipeptidyl peptidase IV inhibitor | 4 | VF | [81-82],[115-116],[387-388],[437-438]           |
| 8918 | dipeptidyl peptidase IV inhibitor (DPP IV inhibitor) | dipeptidyl peptidase IV inhibitor | 1 | VG | [181-182]                                       |
| 8920 | dipeptidyl peptidase IV inhibitor (DPP IV inhibitor) | dipeptidyl peptidase IV inhibitor | 2 | VI | [154-155],[445-446]                             |
| 8921 | dipeptidyl peptidase IV inhibitor (DPP IV inhibitor) | dipeptidyl peptidase IV inhibitor | 1 | VK | [407-408]                                       |
| 8922 | dipeptidyl peptidase IV inhibitor (DPP IV inhibitor) | dipeptidyl peptidase IV inhibitor | 4 | VL | [174-175],[196-197],[274-275],[349-350]         |
| 8924 | dipeptidyl peptidase IV inhibitor (DPP IV inhibitor) | dipeptidyl peptidase IV inhibitor | 3 | VN | [28-29],[330-331],[362-363]                     |
| 8925 | dipeptidyl peptidase IV inhibitor (DPP IV inhibitor) | dipeptidyl peptidase IV inhibitor | 2 | VQ | [106-107],[268-269]                             |
| 8926 | dipeptidyl peptidase IV inhibitor (DPP IV inhibitor) | dipeptidyl peptidase IV inhibitor | 4 | VS | [327-328],[380-381],[418-419],[435-436]         |
| 8927 | dipeptidyl peptidase IV inhibitor (DPP IV inhibitor) | dipeptidyl peptidase IV inhibitor | 1 | VT | [63-64]                                         |
| 8929 | dipeptidyl peptidase IV inhibitor (DPP IV inhibitor) | dipeptidyl peptidase IV inhibitor | 3 | VY | [103-104],[319-320],[368-369]                   |
| 8930 | dipeptidyl peptidase IV inhibitor (DPP IV inhibitor) | dipeptidyl peptidase IV inhibitor | 1 | WD | [67-68]                                         |
| 8933 | dipeptidyl peptidase IV inhibitor (DPP IV inhibitor) | dipeptidyl peptidase IV inhibitor | 1 | YD | [96-97]                                         |
| 8934 | dipeptidyl peptidase IV inhibitor (DPP IV inhibitor) | dipeptidyl peptidase IV inhibitor | 1 | YE | [286-287]                                       |

|      |                                                      |                                    |   |     |                                                   |
|------|------------------------------------------------------|------------------------------------|---|-----|---------------------------------------------------|
| 8938 | dipeptidyl peptidase IV inhibitor (DPP IV inhibitor) | dipeptidyl peptidase IV inhibitor  | 1 | YI  | [369-370]                                         |
| 8940 | dipeptidyl peptidase IV inhibitor (DPP IV inhibitor) | dipeptidyl peptidase IV inhibitor  | 1 | YL  | [191-192]                                         |
| 8942 | dipeptidyl peptidase IV inhibitor (DPP IV inhibitor) | dipeptidyl peptidase IV inhibitor  | 3 | YN  | [166-167],[309-310],[320-321]                     |
| 8945 | dipeptidyl peptidase IV inhibitor (DPP IV inhibitor) | dipeptidyl peptidase IV inhibitor  | 1 | YS  | [3-4]                                             |
| 8946 | dipeptidyl peptidase IV inhibitor (DPP IV inhibitor) | dipeptidyl peptidase IV inhibitor  | 1 | YV  | [104-105]                                         |
| 9478 | DPP-III inhibitor                                    | dipeptidyl peptidase III inhibitor | 2 | LR  | [192-193],[338-339]                               |
| 9482 | DPP-III inhibitor                                    | dipeptidyl peptidase III inhibitor | 1 | YL  | [191-192]                                         |
| 9485 | DPP-III inhibitor                                    | dipeptidyl peptidase III inhibitor | 5 | RR  | [55-56],[221-222],[253-254],[292-293],[458-459]   |
| 9486 | DPP-III inhibitor                                    | dipeptidyl peptidase III inhibitor | 2 | TF  | [122-123],[301-302]                               |
| 9487 | DPP-III inhibitor                                    | dipeptidyl peptidase III inhibitor | 2 | GE  | [140-141],[384-385]                               |
| 9488 | DPP-III inhibitor                                    | dipeptidyl peptidase III inhibitor | 1 | GF  | [12-13]                                           |
| 9489 | DPP-III inhibitor                                    | dipeptidyl peptidase III inhibitor | 1 | PR  | [322-323]                                         |
| 9490 | DPP-III inhibitor                                    | dipeptidyl peptidase III inhibitor | 2 | RF  | [38-39],[339-340]                                 |
| 9491 | DPP-III inhibitor                                    | dipeptidyl peptidase III inhibitor | 3 | RV  | [267-268],[326-327],[434-435]                     |
| 9492 | DPP-III inhibitor                                    | dipeptidyl peptidase III inhibitor | 2 | DA  | [353-354],[456-457]                               |
| 9497 | DPP-III inhibitor                                    | dipeptidyl peptidase III inhibitor | 2 | IH  | [111-112],[495-496]                               |
| 9499 | DPP-III inhibitor                                    | dipeptidyl peptidase III inhibitor | 5 | LA  | [178-179],[241-242],[251-252],[356-357],[431-432] |
| 9500 | DPP-III inhibitor                                    | dipeptidyl peptidase III inhibitor | 3 | FA  | [21-22],[404-405],[470-471]                       |
| 9501 | DPP-III inhibitor                                    | dipeptidyl peptidase III inhibitor | 2 | FR  | [82-83],[438-439]                                 |
| 9502 | DPP-III inhibitor                                    | dipeptidyl peptidase III inhibitor | 2 | FL  | [13-14],[340-341]                                 |
| 9504 | DPP-III inhibitor                                    | dipeptidyl peptidase III inhibitor | 2 | PE  | [100-101],[120-121]                               |
| 9509 | DPP-III inhibitor                                    | dipeptidyl peptidase III inhibitor | 3 | VY  | [103-104],[319-320],[368-369]                     |
| 9510 | DPP-III inhibitor                                    | dipeptidyl peptidase III inhibitor | 1 | YI  | [369-370]                                         |
| 9512 | DPP-III inhibitor                                    | dipeptidyl peptidase III inhibitor | 1 | GFL | [12-14]                                           |
| 8247 | CaMPDE inhibitor                                     | CaMPDE inhibitor                   | 1 | IR  | [392-393]                                         |
| 8249 | CaMPDE inhibitor                                     | CaMPDE inhibitor                   | 2 | KF  | [194-195],[414-415]                               |
| 8250 | CaMPDE inhibitor                                     | CaMPDE inhibitor                   | 1 | EF  | [65-66]                                           |
| 2842 | Renin inhibitor                                      | renin inhibitor                    | 2 | LR  | [192-193],[338-339]                               |
| 8246 | renin inhibitor                                      | renin inhibitor                    | 1 | IR  | [392-393]                                         |
| 8248 | Renin inhibitor                                      | renin inhibitor                    | 2 | KF  | [194-195],[414-415]                               |
| 8251 | Renin inhibitor                                      | renin inhibitor                    | 1 | EF  | [65-66]                                           |
| 9432 | Renin inhibitor                                      | renin inhibitor                    | 5 | SF  | [8-9],[20-21],[244-245],[419-420],[449-450]       |



|      |                 |                 |   |      |                     |
|------|-----------------|-----------------|---|------|---------------------|
| 9469 | Renin inhibitor | renin inhibitor | 1 | RALP | [439-442]           |
| 9471 | Renin inhibitor | renin inhibitor | 2 | TF   | [122-123],[301-302] |

Table S19. Profile of potential biological activity of fragments of protein Pis v 2.0201.

| ID   | Name of peptide                           | Activity      | Number | Sequence | Location                                |
|------|-------------------------------------------|---------------|--------|----------|-----------------------------------------|
| 3460 | Prolyl endopeptidase inhibitor            | antiamnestic  | 2      | PG       | [117-118],[463-464]                     |
| 3258 | beta-lactokinin                           | ACE inhibitor | 2      | IR       | [154-155],[383-384]                     |
| 3361 | ACE inhibitor from sardine                | ACE inhibitor | 1      | LKL      | [298-300]                               |
| 3373 | ACE inhibitor from beta-CN                | ACE inhibitor | 1      | PQR      | [277-279]                               |
| 3381 | ACE inhibitor                             | ACE inhibitor | 1      | LY       | [341-342]                               |
| 3383 | ACE inhibitor                             | ACE inhibitor | 1      | IY       | [170-171]                               |
| 3384 | ACE inhibitor                             | ACE inhibitor | 3      | VF       | [81-82],[115-116],[378-379]             |
| 3393 | ACE inhibitor                             | ACE inhibitor | 1      | FAP      | [461-463]                               |
| 3421 | ACE inhibitor                             | ACE inhibitor | 1      | LVL      | [178-180]                               |
| 3463 | ACE inhibitor                             | ACE inhibitor | 1      | HIR      | [153-155]                               |
| 3489 | ACE inhibitor from sake lees              | ACE inhibitor | 2      | RF       | [38-39],[330-331]                       |
| 3492 | ACE inhibitor from sake                   | ACE inhibitor | 3      | VY       | [103-104],[310-311],[359-360]           |
| 3502 | ACE inhibitor (BSA fr. 221-222)           | ACE inhibitor | 1      | FP       | [116-117]                               |
| 3532 | ACE inhibitor                             | ACE inhibitor | 1      | GY       | [2-3]                                   |
| 3537 | ACE inhibitor                             | ACE inhibitor | 1      | PR       | [313-314]                               |
| 3541 | ACE inhibitor                             | ACE inhibitor | 1      | LSP      | [275-277]                               |
| 3551 | ACE inhibitor (from bovine beta-Lg)       | ACE inhibitor | 1      | LF       | [16-17]                                 |
| 7502 | ACE inhibitor                             | ACE inhibitor | 1      | IVR      | [265-267]                               |
| 7509 | ACE inhibitor from Alaskan pollack skin   | ACE inhibitor | 1      | GLP      | [431-433]                               |
| 7513 | ACE inhibitor from Alaskan pollack skin   | ACE inhibitor | 1      | PL       | [433-434]                               |
| 7541 | ACE inhibitor from wheat germ hydrolysate | ACE inhibitor | 1      | IVY      | [358-360]                               |
| 7543 | ACE inhibitor                             | ACE inhibitor | 1      | AW       | [448-449]                               |
| 7558 | ACE inhibitor from buckwheat              | ACE inhibitor | 3      | VK       | [252-253],[268-269],[398-399]           |
| 7559 | ACE inhibitor from buckwheat              | ACE inhibitor | 1      | PSY      | [94-96]                                 |
| 7562 | ACE inhibitor from soy hydrolysate        | ACE inhibitor | 1      | IA       | [160-161]                               |
| 7583 | ACE inhibitor                             | ACE inhibitor | 1      | AF       | [235-236]                               |
| 7584 | ACE inhibitor                             | ACE inhibitor | 3      | AP       | [99-100],[348-349],[462-463]            |
| 7585 | ACE inhibitor                             | ACE inhibitor | 4      | LA       | [183-184],[241-242],[416-417],[422-423] |
| 7586 | ACE inhibitor                             | ACE inhibitor | 2      | KR       | [54-55],[399-400]                       |

|      |                                     |               |   |     |                                                   |
|------|-------------------------------------|---------------|---|-----|---------------------------------------------------|
| 7587 | ACE inhibitor                       | ACE inhibitor | 2 | VP  | [93-94],[391-392]                                 |
| 7588 | ACE inhibitor                       | ACE inhibitor | 2 | RA  | [307-308],[400-401]                               |
| 7591 | ACE inhibitor                       | ACE inhibitor | 2 | GF  | [12-13],[405-406]                                 |
| 7592 | ACE inhibitor                       | ACE inhibitor | 1 | FR  | [82-83]                                           |
| 7593 | ACE inhibitor                       | ACE inhibitor | 1 | IF  | [460-461]                                         |
| 7594 | ACE inhibitor                       | ACE inhibitor | 1 | VG  | [186-187]                                         |
| 7596 | ACE inhibitor                       | ACE inhibitor | 2 | GI  | [110-111],[263-264]                               |
| 7598 | ACE inhibitor                       | ACE inhibitor | 1 | GA  | [113-114]                                         |
| 7599 | ACE inhibitor                       | ACE inhibitor | 4 | GL  | [90-91],[288-289],[415-416],[431-432]             |
| 7600 | ACE inhibitor                       | ACE inhibitor | 3 | AG  | [61-62],[164-165],[423-424]                       |
| 7603 | ACE inhibitor                       | ACE inhibitor | 3 | GR  | [316-317],[366-367],[424-425]                     |
| 7604 | ACE inhibitor                       | ACE inhibitor | 2 | KG  | [225-226],[338-339]                               |
| 7606 | ACE inhibitor                       | ACE inhibitor | 1 | DA  | [447-448]                                         |
| 7607 | ACE inhibitor                       | ACE inhibitor | 3 | GS  | [108-109],[204-205],[464-465]                     |
| 7608 | ACE inhibitor                       | ACE inhibitor | 3 | GV  | [62-63],[165-166],[339-340]                       |
| 7609 | ACE inhibitor                       | ACE inhibitor | 1 | MG  | [1-2]                                             |
| 7610 | ACE inhibitor                       | ACE inhibitor | 4 | GQ  | [174-175],[214-215],[226-227],[386-387]           |
| 7614 | ACE inhibitor                       | ACE inhibitor | 1 | HG  | [112-113]                                         |
| 7615 | ACE inhibitor                       | ACE inhibitor | 2 | GE  | [145-146],[375-376]                               |
| 7616 | ACE inhibitor                       | ACE inhibitor | 4 | GG  | [203-204],[212-213],[213-214],[315-316]           |
| 7617 | ACE inhibitor                       | ACE inhibitor | 2 | QG  | [107-108],[211-212]                               |
| 7618 | ACE inhibitor                       | ACE inhibitor | 2 | SG  | [109-110],[144-145]                               |
| 7619 | ACE inhibitor                       | ACE inhibitor | 2 | LG  | [11-12],[202-203]                                 |
| 7620 | ACE inhibitor                       | ACE inhibitor | 1 | GD  | [157-158]                                         |
| 7622 | ACE inhibitor                       | ACE inhibitor | 2 | EG  | [156-157],[385-386]                               |
| 7623 | ACE inhibitor                       | ACE inhibitor | 1 | EA  | [60-61]                                           |
| 7624 | ACE inhibitor                       | ACE inhibitor | 5 | NG  | [173-174],[287-288],[365-366],[374-375],[414-415] |
| 7625 | ACE inhibitor                       | ACE inhibitor | 2 | PG  | [117-118],[463-464]                               |
| 7628 | ACE inhibitor from k-CN (fr. 67-68) | ACE inhibitor | 2 | VR  | [151-152],[266-267]                               |
| 7635 | ACE inhibitor from k-CN (fr. 51-53) | ACE inhibitor | 1 | VAV | [79-81]                                           |
| 7680 | ACE inhibitor from pea vicilin      | ACE inhibitor | 1 | QK  | [149-150]                                         |
| 7681 | ACE inhibitor from soy              | ACE inhibitor | 1 | DG  | [404-405]                                         |

|      |                                           |               |   |      |                                             |
|------|-------------------------------------------|---------------|---|------|---------------------------------------------|
| 7683 | ACE inhibitor from garlic                 | ACE inhibitor | 1 | NF   | [394-395]                                   |
| 7684 | ACE inhibitor from garlic                 | ACE inhibitor | 1 | SY   | [95-96]                                     |
| 7685 | ACE inhibitor from garlic                 | ACE inhibitor | 5 | SF   | [8-9],[20-21],[244-245],[410-411],[440-441] |
| 7692 | ACE inhibitor                             | ACE inhibitor | 1 | KF   | [199-200]                                   |
| 7693 | ACE inhibitor from wakame                 | ACE inhibitor | 3 | KL   | [177-178],[254-255],[299-300]               |
| 7741 | ACE inhibitor                             | ACE inhibitor | 1 | RR   | [55-56]                                     |
| 7752 | ACE inhibitor from shark meat hydrolysate | ACE inhibitor | 1 | EY   | [283-284]                                   |
| 7807 | ACE inhibitor from caprine b-Lg           | ACE inhibitor | 1 | LLF  | [15-17]                                     |
| 7826 | ACE inhibitor                             | ACE inhibitor | 3 | EI   | [209-210],[239-240],[382-383]               |
| 7827 | ACE inhibitor                             | ACE inhibitor | 2 | IE   | [24-25],[57-58]                             |
| 7829 | ACE inhibitor                             | ACE inhibitor | 1 | VE   | [336-337]                                   |
| 7830 | ACE inhibitor                             | ACE inhibitor | 1 | TE   | [64-65]                                     |
| 7831 | ACE inhibitor                             | ACE inhibitor | 4 | LQ   | [74-75],[255-256],[272-273],[332-333]       |
| 7832 | ACE inhibitor                             | ACE inhibitor | 3 | LN   | [48-49],[300-301],[324-325]                 |
| 7834 | ACE inhibitor                             | ACE inhibitor | 2 | TQ   | [41-42],[249-250]                           |
| 7835 | ACE inhibitor                             | ACE inhibitor | 2 | AH   | [167-168],[355-356]                         |
| 7837 | ACE inhibitor                             | ACE inhibitor | 3 | PQ   | [206-207],[277-278],[392-393]               |
| 7838 | ACE inhibitor                             | ACE inhibitor | 1 | EW   | [407-408]                                   |
| 7840 | ACE inhibitor                             | ACE inhibitor | 3 | EK   | [259-260],[281-282],[337-338]               |
| 7841 | ACE inhibitor                             | ACE inhibitor | 3 | KE   | [269-270],[282-283],[452-453]               |
| 7843 | ACE inhibitor                             | ACE inhibitor | 1 | PH   | [349-350]                                   |
| 8182 | ACE Inhibitor                             | ACE inhibitor | 1 | ALEP | [50-53]                                     |
| 8185 | ACE inhibitor                             | ACE inhibitor | 2 | TF   | [122-123],[292-293]                         |
| 8193 | ACE inhibitor                             | ACE inhibitor | 1 | AI   | [345-346]                                   |
| 8402 | ACE inhibitor                             | ACE inhibitor | 1 | LVY  | [102-104]                                   |
| 8951 | ACE inhibitor                             | ACE inhibitor | 3 | AV   | [80-81],[114-115],[396-397]                 |
| 9029 | ACE inhibitor                             | ACE inhibitor | 1 | ALP  | [161-163]                                   |
| 9031 | ACE inhibitor                             | ACE inhibitor | 1 | LEE  | [289-291]                                   |
| 9050 | ACE inhibitor                             | ACE inhibitor | 1 | VLY  | [340-342]                                   |
| 9076 | ACE inhibitor                             | ACE inhibitor | 2 | FQ   | [39-40],[123-124]                           |
| 9077 | ACE inhibitor                             | ACE inhibitor | 1 | YV   | [104-105]                                   |
| 9079 | ACE inhibitor                             | ACE inhibitor | 3 | IL   | [232-233],[240-241],[328-329]               |

|      |                                                                      |                   |   |       |                                                           |
|------|----------------------------------------------------------------------|-------------------|---|-------|-----------------------------------------------------------|
| 9173 | ACE inhibitor                                                        | ACE inhibitor     | 5 | RG    | [89-90],[262-263],[314-315],[363-364],[430-431]           |
| 9185 | ACE inhibitor                                                        | ACE inhibitor     | 3 | YN    | [96-97],[171-172],[311-312]                               |
| 9196 | ACE inhibitor                                                        | ACE inhibitor     | 1 | AVV   | [396-398]                                                 |
| 9213 | ACE inhibitor                                                        | ACE inhibitor     | 2 | LR    | [197-198],[329-330]                                       |
| 9241 | ACE inhibitor                                                        | ACE inhibitor     | 1 | MAP   | [347-349]                                                 |
| 9325 | ACE inhibitor                                                        | ACE inhibitor     | 1 | GVLY  | [339-342]                                                 |
| 9708 | ACE inhibitor                                                        | ACE inhibitor     | 1 | LPILR | [326-330]                                                 |
| 9730 | ACE inhibitor                                                        | ACE inhibitor     | 1 | NPR   | [312-314]                                                 |
| 3285 | Antithrombotic peptide                                               | antithrombotic    | 2 | PG    | [117-118],[463-464]                                       |
| 3354 | Antithrombotic peptide                                               | antithrombotic    | 2 | DEE   | [237-239],[380-382]                                       |
| 3356 | Stimulating vasoactive substance release                             | stimulating       | 1 | LLL   | [14-16]                                                   |
| 8320 | Glucose uptake stimulating peptide                                   | stimulating       | 4 | VL    | [179-180],[201-202],[274-275],[340-341]                   |
| 8321 | Glucose uptake stimulating peptide                                   | stimulating       | 6 | LV    | [92-93],[102-103],[178-179],[180-181],[251-252],[388-389] |
| 8322 | Glucose uptake stimulating peptide                                   | stimulating       | 3 | IV    | [265-266],[358-359],[370-371]                             |
| 8323 | Glucose uptake stimulating peptide                                   | stimulating       | 3 | IL    | [232-233],[240-241],[328-329]                             |
| 8325 | Glucose uptake stimulating peptide                                   | stimulating       | 2 | II    | [159-160],[264-265]                                       |
| 8326 | Glucose uptake stimulating peptide                                   | stimulating       | 4 | LL    | [6-7],[14-15],[15-16],[91-92]                             |
| 8329 | Stimulating vasoactive substance release                             | stimulating       | 6 | EE    | [71-72],[125-126],[238-239],[258-259],[290-291],[381-382] |
| 8330 | Stimulating vasoactive substance release                             | stimulating       | 5 | SE    | [59-60],[138-139],[189-190],[372-373],[456-457]           |
| 3061 | Immunostimulating peptide                                            | immunostimulating | 1 | GFL   | [12-14]                                                   |
| 2890 | neuropeptide                                                         | neuropeptide      | 4 | GQ    | [174-175],[214-215],[226-227],[386-387]                   |
| 8310 | Anxiolytic peptide                                                   | neuropeptide      | 1 | YL    | [196-197]                                                 |
| 2737 | Peptide regulating phosphoinositol metabolism                        | regulating        | 1 | GFL   | [12-14]                                                   |
| 2754 | peptide regulating the stomach mucosal membrane activity             | regulating        | 2 | PG    | [117-118],[463-464]                                       |
| 8318 | Dvl protein binding                                                  | anticancer        | 1 | VVV   | [389-391]                                                 |
| 7872 | peptide from soybean protein isolates: beta-conglycinin and glycinin | antioxidative     | 1 | LY    | [341-342]                                                 |
| 7873 | peptide from soybean protein isolates: beta-conglycinin and glycinin | antioxidative     | 1 | IY    | [170-171]                                                 |
| 7886 | peptide derived from egg white albumin                               | antioxidative     | 2 | AH    | [167-168],[355-356]                                       |
| 7888 | antioxidative peptide                                                | antioxidative     | 1 | EL    | [101-102]                                                 |
| 8037 | synthetic peptide                                                    | antioxidative     | 1 | PHW   | [349-351]                                                 |
| 8059 | synthetic peptide                                                    | antioxidative     | 1 | RHI   | [152-154]                                                 |

|      |                                                                        |                                           |   |       |                                                 |
|------|------------------------------------------------------------------------|-------------------------------------------|---|-------|-------------------------------------------------|
| 8067 | synthetic peptide                                                      | antioxidative                             | 1 | RHT   | [83-85]                                         |
| 8139 | synthetic peptide                                                      | antioxidative                             | 1 | PEL   | [100-102]                                       |
| 8215 | Antioxidative peptide                                                  | antioxidative                             | 2 | IR    | [154-155],[383-384]                             |
| 8217 | Antioxidative peptide                                                  | antioxidative                             | 2 | LK    | [298-299],[451-452]                             |
| 8224 | antioxidative peptide                                                  | antioxidative                             | 3 | VY    | [103-104],[310-311],[359-360]                   |
| 8460 | Antioxidant peptide from marine bivalve ( <i>Macrta veneriformis</i> ) | antioxidative                             | 1 | AW    | [448-449]                                       |
| 9342 | Antioxidative peptide                                                  | antioxidative                             | 1 | FC    | [293-294]                                       |
| 9361 | Antioxidative peptide                                                  | antioxidative                             | 1 | VYV   | [103-105]                                       |
| 9716 | Antioxidative peptide                                                  | antioxidative                             | 1 | LPILR | [326-330]                                       |
| 3751 |                                                                        | bacterial permease ligand                 | 1 | KK    | [253-254]                                       |
| 8661 | Hypotensive peptide                                                    | hypotensive                               | 1 | LPILR | [326-330]                                       |
| 4005 |                                                                        | activating ubiquitin-mediated proteolysis | 2 | RA    | [307-308],[400-401]                             |
| 4006 | Ubiquitin-mediated proteolysis activating peptide                      | activating ubiquitin-mediated proteolysis | 4 | LA    | [183-184],[241-242],[416-417],[422-423]         |
| 9580 | Hypolipidemic peptide                                                  | hypolipidemic                             | 1 | EF    | [65-66]                                         |
| 9650 | Alpha-glucosidase inhibitor                                            | alpha-glucosidase inhibitor               | 1 | EA    | [60-61]                                         |
| 9693 | Alpha-glucosidase inhibitor                                            | alpha-glucosidase inhibitor               | 1 | VE    | [336-337]                                       |
| 9694 | Alpha-glucosidase inhibitor                                            | alpha-glucosidase inhibitor               | 2 | PE    | [100-101],[120-121]                             |
| 9695 | Alpha-glucosidase inhibitor                                            | alpha-glucosidase inhibitor               | 2 | AD    | [184-185],[308-309]                             |
| 3172 | dipeptidyl peptidase IV inhibitor (DPP IV inhibitor)                   | dipeptidyl peptidase IV inhibitor         | 3 | VA    | [79-80],[166-167],[181-182]                     |
| 3173 | dipeptidyl peptidase IV inhibitor (DPP IV inhibitor)                   | dipeptidyl peptidase IV inhibitor         | 1 | MA    | [347-348]                                       |
| 3175 | dipeptidyl peptidase IV inhibitor (DPP IV inhibitor)                   | dipeptidyl peptidase IV inhibitor         | 4 | LA    | [183-184],[241-242],[416-417],[422-423]         |
| 3176 | dipeptidyl peptidase IV inhibitor (DPP IV inhibitor)                   | dipeptidyl peptidase IV inhibitor         | 3 | FA    | [21-22],[395-396],[461-462]                     |
| 3177 | dipeptidyl peptidase IV inhibitor (DPP IV inhibitor)                   | dipeptidyl peptidase IV inhibitor         | 3 | AP    | [99-100],[348-349],[462-463]                    |
| 3179 | dipeptidyl peptidase IV inhibitor (DPP IV inhibitor)                   | dipeptidyl peptidase IV inhibitor         | 1 | PA    | [163-164]                                       |
| 3180 | dipeptidyl peptidase IV inhibitor (DPP IV inhibitor)                   | dipeptidyl peptidase IV inhibitor         | 3 | LP    | [162-163],[326-327],[432-433]                   |
| 3181 | dipeptidyl peptidase IV inhibitor (DPP IV inhibitor)                   | dipeptidyl peptidase IV inhibitor         | 2 | VP    | [93-94],[391-392]                               |
| 3182 | dipeptidyl peptidase IV inhibitor (DPP IV inhibitor)                   | dipeptidyl peptidase IV inhibitor         | 4 | LL    | [6-7],[14-15],[15-16],[91-92]                   |
| 3183 | dipeptidyl peptidase IV inhibitor (DPP IV inhibitor)                   | dipeptidyl peptidase IV inhibitor         | 5 | VV    | [27-28],[105-106],[389-390],[390-391],[397-398] |
| 8500 | dipeptidyl peptidase IV inhibitor (DPP IV inhibitor)                   | dipeptidyl peptidase IV inhibitor         | 1 | APG   | [462-464]                                       |
| 8505 | Dipeptidyl peptidase IV inhibitor (DPP IV inhibitor)                   | dipeptidyl peptidase IV inhibitor         | 2 | SP    | [205-206],[276-277]                             |
| 8506 | dipeptidyl peptidase IV inhibitor (DPP IV inhibitor)                   | dipeptidyl peptidase IV inhibitor         | 1 | FP    | [116-117]                                       |

|      |                                                      |                                   |   |     |                                       |
|------|------------------------------------------------------|-----------------------------------|---|-----|---------------------------------------|
| 8524 | dipeptidyl peptidase IV inhibitor (DPP IV inhibitor) | dipeptidyl peptidase IV inhibitor | 1 | GA  | [113-114]                             |
| 8525 | dipeptidyl peptidase IV inhibitor (DPP IV inhibitor) | dipeptidyl peptidase IV inhibitor | 1 | IA  | [160-161]                             |
| 8526 | dipeptidyl peptidase IV inhibitor (DPP IV inhibitor) | dipeptidyl peptidase IV inhibitor | 2 | RA  | [307-308],[400-401]                   |
| 8529 | dipeptidyl peptidase IV inhibitor (DPP IV inhibitor) | dipeptidyl peptidase IV inhibitor | 1 | EP  | [52-53]                               |
| 8530 | dipeptidyl peptidase IV inhibitor (DPP IV inhibitor) | dipeptidyl peptidase IV inhibitor | 1 | NP  | [312-313]                             |
| 8555 | dipeptidyl peptidase IV inhibitor (DPP IV inhibitor) | dipeptidyl peptidase IV inhibitor | 2 | FL  | [13-14],[331-332]                     |
| 8556 | dipeptidyl peptidase IV inhibitor (DPP IV inhibitor) | dipeptidyl peptidase IV inhibitor | 1 | WV  | [408-409]                             |
| 8558 | dipeptidyl peptidase IV inhibitor (DPP IV inhibitor) | dipeptidyl peptidase IV inhibitor | 3 | EK  | [259-260],[281-282],[337-338]         |
| 8559 | dipeptidyl peptidase IV inhibitor (DPP IV inhibitor) | dipeptidyl peptidase IV inhibitor | 4 | AL  | [50-51],[161-162],[182-183],[323-324] |
| 8560 | dipeptidyl peptidase IV inhibitor (DPP IV inhibitor) | dipeptidyl peptidase IV inhibitor | 2 | SL  | [5-6],[10-11]                         |
| 8561 | dipeptidyl peptidase IV inhibitor (DPP IV inhibitor) | dipeptidyl peptidase IV inhibitor | 4 | GL  | [90-91],[288-289],[415-416],[431-432] |
| 8594 | dipeptidyl peptidase IV inhibitor (DPP IV inhibitor) | dipeptidyl peptidase IV inhibitor | 2 | VR  | [151-152],[266-267]                   |
| 8616 | dipeptidyl peptidase IV inhibitor (DPP IV inhibitor) | dipeptidyl peptidase IV inhibitor | 1 | LPL | [432-434]                             |
| 8638 | dipeptidyl peptidase IV inhibitor (DPP IV inhibitor) | dipeptidyl peptidase IV inhibitor | 1 | PL  | [433-434]                             |
| 8679 | dipeptidyl peptidase IV inhibitor (DPP IV inhibitor) | dipeptidyl peptidase IV inhibitor | 1 | WI  | [169-170]                             |
| 8680 | dipeptidyl peptidase IV inhibitor (DPP IV inhibitor) | dipeptidyl peptidase IV inhibitor | 2 | WN  | [351-352],[449-450]                   |
| 8687 | dipeptidyl peptidase IV inhibitor (DPP IV inhibitor) | dipeptidyl peptidase IV inhibitor | 1 | WS  | [217-218]                             |
| 8695 | dipeptidyl peptidase IV inhibitor (DPP IV inhibitor) | dipeptidyl peptidase IV inhibitor | 1 | AW  | [448-449]                             |
| 8757 | dipeptidyl peptidase IV inhibitor (DPP IV inhibitor) | dipeptidyl peptidase IV inhibitor | 2 | AD  | [184-185],[308-309]                   |
| 8759 | dipeptidyl peptidase IV inhibitor (DPP IV inhibitor) | dipeptidyl peptidase IV inhibitor | 1 | AF  | [235-236]                             |
| 8760 | dipeptidyl peptidase IV inhibitor (DPP IV inhibitor) | dipeptidyl peptidase IV inhibitor | 3 | AG  | [61-62],[164-165],[423-424]           |
| 8761 | dipeptidyl peptidase IV inhibitor (DPP IV inhibitor) | dipeptidyl peptidase IV inhibitor | 2 | AH  | [167-168],[355-356]                   |
| 8762 | dipeptidyl peptidase IV inhibitor (DPP IV inhibitor) | dipeptidyl peptidase IV inhibitor | 1 | AS  | [401-402]                             |
| 8764 | dipeptidyl peptidase IV inhibitor (DPP IV inhibitor) | dipeptidyl peptidase IV inhibitor | 3 | AV  | [80-81],[114-115],[396-397]           |
| 8766 | dipeptidyl peptidase IV inhibitor (DPP IV inhibitor) | dipeptidyl peptidase IV inhibitor | 1 | DN  | [286-287]                             |
| 8767 | dipeptidyl peptidase IV inhibitor (DPP IV inhibitor) | dipeptidyl peptidase IV inhibitor | 1 | DP  | [304-305]                             |
| 8768 | dipeptidyl peptidase IV inhibitor (DPP IV inhibitor) | dipeptidyl peptidase IV inhibitor | 2 | DQ  | [68-69],[194-195]                     |
| 8770 | dipeptidyl peptidase IV inhibitor (DPP IV inhibitor) | dipeptidyl peptidase IV inhibitor | 2 | EG  | [156-157],[385-386]                   |
| 8772 | dipeptidyl peptidase IV inhibitor (DPP IV inhibitor) | dipeptidyl peptidase IV inhibitor | 3 | EI  | [209-210],[239-240],[382-383]         |
| 8773 | dipeptidyl peptidase IV inhibitor (DPP IV inhibitor) | dipeptidyl peptidase IV inhibitor | 4 | ES  | [58-59],[126-127],[376-377],[453-454] |
| 8774 | dipeptidyl peptidase IV inhibitor (DPP IV inhibitor) | dipeptidyl peptidase IV inhibitor | 2 | ET  | [121-122],[291-292]                   |
| 8776 | dipeptidyl peptidase IV inhibitor (DPP IV inhibitor) | dipeptidyl peptidase IV inhibitor | 1 | EW  | [407-408]                             |

|      |                                                      |                                   |   |    |                                                           |
|------|------------------------------------------------------|-----------------------------------|---|----|-----------------------------------------------------------|
| 8777 | dipeptidyl peptidase IV inhibitor (DPP IV inhibitor) | dipeptidyl peptidase IV inhibitor | 1 | EY | [283-284]                                                 |
| 8778 | dipeptidyl peptidase IV inhibitor (DPP IV inhibitor) | dipeptidyl peptidase IV inhibitor | 1 | FN | [245-246]                                                 |
| 8779 | dipeptidyl peptidase IV inhibitor (DPP IV inhibitor) | dipeptidyl peptidase IV inhibitor | 2 | FQ | [39-40],[123-124]                                         |
| 8780 | dipeptidyl peptidase IV inhibitor (DPP IV inhibitor) | dipeptidyl peptidase IV inhibitor | 1 | FR | [82-83]                                                   |
| 8781 | dipeptidyl peptidase IV inhibitor (DPP IV inhibitor) | dipeptidyl peptidase IV inhibitor | 2 | GE | [145-146],[375-376]                                       |
| 8782 | dipeptidyl peptidase IV inhibitor (DPP IV inhibitor) | dipeptidyl peptidase IV inhibitor | 2 | GF | [12-13],[405-406]                                         |
| 8783 | dipeptidyl peptidase IV inhibitor (DPP IV inhibitor) | dipeptidyl peptidase IV inhibitor | 4 | GG | [203-204],[212-213],[213-214],[315-316]                   |
| 8785 | dipeptidyl peptidase IV inhibitor (DPP IV inhibitor) | dipeptidyl peptidase IV inhibitor | 2 | GI | [110-111],[263-264]                                       |
| 8786 | dipeptidyl peptidase IV inhibitor (DPP IV inhibitor) | dipeptidyl peptidase IV inhibitor | 3 | GV | [62-63],[165-166],[339-340]                               |
| 8788 | dipeptidyl peptidase IV inhibitor (DPP IV inhibitor) | dipeptidyl peptidase IV inhibitor | 1 | GY | [2-3]                                                     |
| 8793 | dipeptidyl peptidase IV inhibitor (DPP IV inhibitor) | dipeptidyl peptidase IV inhibitor | 1 | HI | [153-154]                                                 |
| 8795 | dipeptidyl peptidase IV inhibitor (DPP IV inhibitor) | dipeptidyl peptidase IV inhibitor | 2 | HS | [135-136],[356-357]                                       |
| 8796 | dipeptidyl peptidase IV inhibitor (DPP IV inhibitor) | dipeptidyl peptidase IV inhibitor | 1 | HT | [84-85]                                                   |
| 8798 | dipeptidyl peptidase IV inhibitor (DPP IV inhibitor) | dipeptidyl peptidase IV inhibitor | 2 | HW | [168-169],[350-351]                                       |
| 8800 | dipeptidyl peptidase IV inhibitor (DPP IV inhibitor) | dipeptidyl peptidase IV inhibitor | 1 | IH | [111-112]                                                 |
| 8801 | dipeptidyl peptidase IV inhibitor (DPP IV inhibitor) | dipeptidyl peptidase IV inhibitor | 2 | II | [159-160],[264-265]                                       |
| 8802 | dipeptidyl peptidase IV inhibitor (DPP IV inhibitor) | dipeptidyl peptidase IV inhibitor | 3 | IL | [232-233],[240-241],[328-329]                             |
| 8803 | dipeptidyl peptidase IV inhibitor (DPP IV inhibitor) | dipeptidyl peptidase IV inhibitor | 1 | IM | [346-347]                                                 |
| 8804 | dipeptidyl peptidase IV inhibitor (DPP IV inhibitor) | dipeptidyl peptidase IV inhibitor | 2 | IN | [302-303],[321-322]                                       |
| 8805 | dipeptidyl peptidase IV inhibitor (DPP IV inhibitor) | dipeptidyl peptidase IV inhibitor | 4 | IQ | [45-46],[86-87],[210-211],[437-438]                       |
| 8806 | dipeptidyl peptidase IV inhibitor (DPP IV inhibitor) | dipeptidyl peptidase IV inhibitor | 2 | IR | [154-155],[383-384]                                       |
| 8808 | dipeptidyl peptidase IV inhibitor (DPP IV inhibitor) | dipeptidyl peptidase IV inhibitor | 3 | KE | [269-270],[282-283],[452-453]                             |
| 8809 | dipeptidyl peptidase IV inhibitor (DPP IV inhibitor) | dipeptidyl peptidase IV inhibitor | 1 | KF | [199-200]                                                 |
| 8810 | dipeptidyl peptidase IV inhibitor (DPP IV inhibitor) | dipeptidyl peptidase IV inhibitor | 2 | KG | [225-226],[338-339]                                       |
| 8812 | dipeptidyl peptidase IV inhibitor (DPP IV inhibitor) | dipeptidyl peptidase IV inhibitor | 1 | KI | [418-419]                                                 |
| 8813 | dipeptidyl peptidase IV inhibitor (DPP IV inhibitor) | dipeptidyl peptidase IV inhibitor | 1 | KK | [253-254]                                                 |
| 8814 | dipeptidyl peptidase IV inhibitor (DPP IV inhibitor) | dipeptidyl peptidase IV inhibitor | 2 | KR | [54-55],[399-400]                                         |
| 8816 | dipeptidyl peptidase IV inhibitor (DPP IV inhibitor) | dipeptidyl peptidase IV inhibitor | 1 | KT | [412-413]                                                 |
| 8817 | dipeptidyl peptidase IV inhibitor (DPP IV inhibitor) | dipeptidyl peptidase IV inhibitor | 1 | KV | [150-151]                                                 |
| 8823 | dipeptidyl peptidase IV inhibitor (DPP IV inhibitor) | dipeptidyl peptidase IV inhibitor | 3 | LN | [48-49],[300-301],[324-325]                               |
| 8825 | dipeptidyl peptidase IV inhibitor (DPP IV inhibitor) | dipeptidyl peptidase IV inhibitor | 6 | LV | [92-93],[102-103],[178-179],[180-181],[251-252],[388-389] |
| 8828 | dipeptidyl peptidase IV inhibitor (DPP IV inhibitor) | dipeptidyl peptidase IV inhibitor | 1 | MG | [1-2]                                                     |



|      |                                                      |                                   |   |    |                                                                                         |
|------|------------------------------------------------------|-----------------------------------|---|----|-----------------------------------------------------------------------------------------|
| 8834 | dipeptidyl peptidase IV inhibitor (DPP IV inhibitor) | dipeptidyl peptidase IV inhibitor | 1 | MN | [353-354]                                                                               |
| 8835 | dipeptidyl peptidase IV inhibitor (DPP IV inhibitor) | dipeptidyl peptidase IV inhibitor | 1 | MQ | [368-369]                                                                               |
| 8836 | dipeptidyl peptidase IV inhibitor (DPP IV inhibitor) | dipeptidyl peptidase IV inhibitor | 1 | MR | [429-430]                                                                               |
| 8839 | dipeptidyl peptidase IV inhibitor (DPP IV inhibitor) | dipeptidyl peptidase IV inhibitor | 5 | NA | [49-50],[98-99],[322-323],[344-345],[354-355]                                           |
| 8840 | dipeptidyl peptidase IV inhibitor (DPP IV inhibitor) | dipeptidyl peptidase IV inhibitor | 1 | ND | [303-304]                                                                               |
| 8841 | dipeptidyl peptidase IV inhibitor (DPP IV inhibitor) | dipeptidyl peptidase IV inhibitor | 1 | NE | [70-71]                                                                                 |
| 8842 | dipeptidyl peptidase IV inhibitor (DPP IV inhibitor) | dipeptidyl peptidase IV inhibitor | 1 | NF | [394-395]                                                                               |
| 8843 | dipeptidyl peptidase IV inhibitor (DPP IV inhibitor) | dipeptidyl peptidase IV inhibitor | 5 | NG | [173-174],[287-288],[365-366],[374-375],[414-415]                                       |
| 8845 | dipeptidyl peptidase IV inhibitor (DPP IV inhibitor) | dipeptidyl peptidase IV inhibitor | 3 | NL | [47-48],[325-326],[450-451]                                                             |
| 8846 | dipeptidyl peptidase IV inhibitor (DPP IV inhibitor) | dipeptidyl peptidase IV inhibitor | 1 | NM | [352-353]                                                                               |
| 8847 | dipeptidyl peptidase IV inhibitor (DPP IV inhibitor) | dipeptidyl peptidase IV inhibitor | 3 | NN | [97-98],[172-173],[230-231]                                                             |
| 8848 | dipeptidyl peptidase IV inhibitor (DPP IV inhibitor) | dipeptidyl peptidase IV inhibitor | 1 | NQ | [191-192]                                                                               |
| 8851 | dipeptidyl peptidase IV inhibitor (DPP IV inhibitor) | dipeptidyl peptidase IV inhibitor | 1 | NV | [78-79]                                                                                 |
| 8855 | dipeptidyl peptidase IV inhibitor (DPP IV inhibitor) | dipeptidyl peptidase IV inhibitor | 2 | PG | [117-118],[463-464]                                                                     |
| 8856 | dipeptidyl peptidase IV inhibitor (DPP IV inhibitor) | dipeptidyl peptidase IV inhibitor | 1 | PH | [349-350]                                                                               |
| 8857 | dipeptidyl peptidase IV inhibitor (DPP IV inhibitor) | dipeptidyl peptidase IV inhibitor | 1 | PI | [327-328]                                                                               |
| 8858 | dipeptidyl peptidase IV inhibitor (DPP IV inhibitor) | dipeptidyl peptidase IV inhibitor | 1 | PK | [53-54]                                                                                 |
| 8861 | dipeptidyl peptidase IV inhibitor (DPP IV inhibitor) | dipeptidyl peptidase IV inhibitor | 3 | PQ | [206-207],[277-278],[392-393]                                                           |
| 8862 | dipeptidyl peptidase IV inhibitor (DPP IV inhibitor) | dipeptidyl peptidase IV inhibitor | 2 | PS | [94-95],[305-306]                                                                       |
| 8869 | dipeptidyl peptidase IV inhibitor (DPP IV inhibitor) | dipeptidyl peptidase IV inhibitor | 3 | QE | [124-125],[208-209],[280-281]                                                           |
| 8871 | dipeptidyl peptidase IV inhibitor (DPP IV inhibitor) | dipeptidyl peptidase IV inhibitor | 2 | QG | [107-108],[211-212]                                                                     |
| 8872 | dipeptidyl peptidase IV inhibitor (DPP IV inhibitor) | dipeptidyl peptidase IV inhibitor | 2 | QH | [134-135],[147-148]                                                                     |
| 8873 | dipeptidyl peptidase IV inhibitor (DPP IV inhibitor) | dipeptidyl peptidase IV inhibitor | 3 | QI | [23-24],[44-45],[369-370]                                                               |
| 8874 | dipeptidyl peptidase IV inhibitor (DPP IV inhibitor) | dipeptidyl peptidase IV inhibitor | 6 | QL | [73-74],[192-193],[250-251],[333-334],[387-388],[421-422]                               |
| 8875 | dipeptidyl peptidase IV inhibitor (DPP IV inhibitor) | dipeptidyl peptidase IV inhibitor | 5 | QN | [46-47],[69-70],[343-344],[393-394],[438-439]                                           |
| 8876 | dipeptidyl peptidase IV inhibitor (DPP IV inhibitor) | dipeptidyl peptidase IV inhibitor | 7 | QQ | [31-32],[34-35],[35-36],[36-37],[142-143],[207-208],[227-228]                           |
| 8877 | dipeptidyl peptidase IV inhibitor (DPP IV inhibitor) | dipeptidyl peptidase IV inhibitor | 9 | QS | [87-88],[128-129],[130-131],[143-144],[175-176],[215-216],[219-220],[228-229],[243-244] |
| 8878 | dipeptidyl peptidase IV inhibitor (DPP IV inhibitor) | dipeptidyl peptidase IV inhibitor | 1 | QT | [40-41]                                                                                 |
| 8879 | dipeptidyl peptidase IV inhibitor (DPP IV inhibitor) | dipeptidyl peptidase IV inhibitor | 2 | QV | [26-27],[273-274]                                                                       |
| 8881 | dipeptidyl peptidase IV inhibitor (DPP IV inhibitor) | dipeptidyl peptidase IV inhibitor | 1 | QY | [195-196]                                                                               |
| 8882 | dipeptidyl peptidase IV inhibitor (DPP IV inhibitor) | dipeptidyl peptidase IV inhibitor | 5 | RG | [89-90],[262-263],[314-315],[363-364],[430-431]                                         |

|      |                                                      |                                   |   |    |                                             |
|------|------------------------------------------------------|-----------------------------------|---|----|---------------------------------------------|
| 8883 | dipeptidyl peptidase IV inhibitor (DPP IV inhibitor) | dipeptidyl peptidase IV inhibitor | 2 | RH | [83-84],[152-153]                           |
| 8884 | dipeptidyl peptidase IV inhibitor (DPP IV inhibitor) | dipeptidyl peptidase IV inhibitor | 2 | RI | [56-57],[425-426]                           |
| 8885 | dipeptidyl peptidase IV inhibitor (DPP IV inhibitor) | dipeptidyl peptidase IV inhibitor | 2 | RK | [198-199],[224-225]                         |
| 8887 | dipeptidyl peptidase IV inhibitor (DPP IV inhibitor) | dipeptidyl peptidase IV inhibitor | 1 | RM | [367-368]                                   |
| 8888 | dipeptidyl peptidase IV inhibitor (DPP IV inhibitor) | dipeptidyl peptidase IV inhibitor | 1 | RN | [471-472]                                   |
| 8889 | dipeptidyl peptidase IV inhibitor (DPP IV inhibitor) | dipeptidyl peptidase IV inhibitor | 1 | RR | [55-56]                                     |
| 8891 | dipeptidyl peptidase IV inhibitor (DPP IV inhibitor) | dipeptidyl peptidase IV inhibitor | 5 | SF | [8-9],[20-21],[244-245],[410-411],[440-441] |
| 8893 | dipeptidyl peptidase IV inhibitor (DPP IV inhibitor) | dipeptidyl peptidase IV inhibitor | 2 | SI | [320-321],[357-358]                         |
| 8894 | dipeptidyl peptidase IV inhibitor (DPP IV inhibitor) | dipeptidyl peptidase IV inhibitor | 1 | SK | [176-177]                                   |
| 8895 | dipeptidyl peptidase IV inhibitor (DPP IV inhibitor) | dipeptidyl peptidase IV inhibitor | 3 | SV | [335-336],[377-378],[427-428]               |
| 8896 | dipeptidyl peptidase IV inhibitor (DPP IV inhibitor) | dipeptidyl peptidase IV inhibitor | 1 | SW | [216-217]                                   |
| 8897 | dipeptidyl peptidase IV inhibitor (DPP IV inhibitor) | dipeptidyl peptidase IV inhibitor | 1 | SY | [95-96]                                     |
| 8899 | dipeptidyl peptidase IV inhibitor (DPP IV inhibitor) | dipeptidyl peptidase IV inhibitor | 1 | TE | [64-65]                                     |
| 8900 | dipeptidyl peptidase IV inhibitor (DPP IV inhibitor) | dipeptidyl peptidase IV inhibitor | 2 | TF | [122-123],[292-293]                         |
| 8903 | dipeptidyl peptidase IV inhibitor (DPP IV inhibitor) | dipeptidyl peptidase IV inhibitor | 2 | TI | [85-86],[459-460]                           |
| 8905 | dipeptidyl peptidase IV inhibitor (DPP IV inhibitor) | dipeptidyl peptidase IV inhibitor | 1 | TL | [297-298]                                   |
| 8906 | dipeptidyl peptidase IV inhibitor (DPP IV inhibitor) | dipeptidyl peptidase IV inhibitor | 1 | TM | [295-296]                                   |
| 8907 | dipeptidyl peptidase IV inhibitor (DPP IV inhibitor) | dipeptidyl peptidase IV inhibitor | 1 | TN | [413-414]                                   |
| 8908 | dipeptidyl peptidase IV inhibitor (DPP IV inhibitor) | dipeptidyl peptidase IV inhibitor | 2 | TQ | [41-42],[249-250]                           |
| 8909 | dipeptidyl peptidase IV inhibitor (DPP IV inhibitor) | dipeptidyl peptidase IV inhibitor | 1 | TR | [362-363]                                   |
| 8910 | dipeptidyl peptidase IV inhibitor (DPP IV inhibitor) | dipeptidyl peptidase IV inhibitor | 1 | TS | [319-320]                                   |
| 8916 | dipeptidyl peptidase IV inhibitor (DPP IV inhibitor) | dipeptidyl peptidase IV inhibitor | 1 | VE | [336-337]                                   |
| 8917 | dipeptidyl peptidase IV inhibitor (DPP IV inhibitor) | dipeptidyl peptidase IV inhibitor | 3 | VF | [81-82],[115-116],[378-379]                 |
| 8918 | dipeptidyl peptidase IV inhibitor (DPP IV inhibitor) | dipeptidyl peptidase IV inhibitor | 1 | VG | [186-187]                                   |
| 8920 | dipeptidyl peptidase IV inhibitor (DPP IV inhibitor) | dipeptidyl peptidase IV inhibitor | 1 | VI | [436-437]                                   |
| 8921 | dipeptidyl peptidase IV inhibitor (DPP IV inhibitor) | dipeptidyl peptidase IV inhibitor | 3 | VK | [252-253],[268-269],[398-399]               |
| 8922 | dipeptidyl peptidase IV inhibitor (DPP IV inhibitor) | dipeptidyl peptidase IV inhibitor | 4 | VL | [179-180],[201-202],[274-275],[340-341]     |
| 8923 | dipeptidyl peptidase IV inhibitor (DPP IV inhibitor) | dipeptidyl peptidase IV inhibitor | 1 | VM | [428-429]                                   |
| 8924 | dipeptidyl peptidase IV inhibitor (DPP IV inhibitor) | dipeptidyl peptidase IV inhibitor | 1 | VN | [28-29]                                     |
| 8925 | dipeptidyl peptidase IV inhibitor (DPP IV inhibitor) | dipeptidyl peptidase IV inhibitor | 1 | VQ | [106-107]                                   |
| 8926 | dipeptidyl peptidase IV inhibitor (DPP IV inhibitor) | dipeptidyl peptidase IV inhibitor | 2 | VS | [371-372],[409-410]                         |
| 8927 | dipeptidyl peptidase IV inhibitor (DPP IV inhibitor) | dipeptidyl peptidase IV inhibitor | 2 | VT | [63-64],[318-319]                           |

|      |                                                      |                                    |   |     |                                         |
|------|------------------------------------------------------|------------------------------------|---|-----|-----------------------------------------|
| 8929 | dipeptidyl peptidase IV inhibitor (DPP IV inhibitor) | dipeptidyl peptidase IV inhibitor  | 3 | VY  | [103-104],[310-311],[359-360]           |
| 8930 | dipeptidyl peptidase IV inhibitor (DPP IV inhibitor) | dipeptidyl peptidase IV inhibitor  | 1 | WD  | [67-68]                                 |
| 8938 | dipeptidyl peptidase IV inhibitor (DPP IV inhibitor) | dipeptidyl peptidase IV inhibitor  | 1 | YI  | [360-361]                               |
| 8940 | dipeptidyl peptidase IV inhibitor (DPP IV inhibitor) | dipeptidyl peptidase IV inhibitor  | 1 | YL  | [196-197]                               |
| 8942 | dipeptidyl peptidase IV inhibitor (DPP IV inhibitor) | dipeptidyl peptidase IV inhibitor  | 3 | YN  | [96-97],[171-172],[311-312]             |
| 8943 | dipeptidyl peptidase IV inhibitor (DPP IV inhibitor) | dipeptidyl peptidase IV inhibitor  | 1 | YQ  | [342-343]                               |
| 8945 | dipeptidyl peptidase IV inhibitor (DPP IV inhibitor) | dipeptidyl peptidase IV inhibitor  | 2 | YS  | [3-4],[284-285]                         |
| 8946 | dipeptidyl peptidase IV inhibitor (DPP IV inhibitor) | dipeptidyl peptidase IV inhibitor  | 1 | YV  | [104-105]                               |
| 9478 | DPP-III inhibitor                                    | dipeptidyl peptidase III inhibitor | 2 | LR  | [197-198],[329-330]                     |
| 9479 | DPP-III inhibitor                                    | dipeptidyl peptidase III inhibitor | 1 | MR  | [429-430]                               |
| 9482 | DPP-III inhibitor                                    | dipeptidyl peptidase III inhibitor | 1 | YL  | [196-197]                               |
| 9485 | DPP-III inhibitor                                    | dipeptidyl peptidase III inhibitor | 1 | RR  | [55-56]                                 |
| 9486 | DPP-III inhibitor                                    | dipeptidyl peptidase III inhibitor | 2 | TF  | [122-123],[292-293]                     |
| 9487 | DPP-III inhibitor                                    | dipeptidyl peptidase III inhibitor | 2 | GE  | [145-146],[375-376]                     |
| 9488 | DPP-III inhibitor                                    | dipeptidyl peptidase III inhibitor | 2 | GF  | [12-13],[405-406]                       |
| 9489 | DPP-III inhibitor                                    | dipeptidyl peptidase III inhibitor | 1 | PR  | [313-314]                               |
| 9490 | DPP-III inhibitor                                    | dipeptidyl peptidase III inhibitor | 2 | RF  | [38-39],[330-331]                       |
| 9491 | DPP-III inhibitor                                    | dipeptidyl peptidase III inhibitor | 2 | RV  | [267-268],[317-318]                     |
| 9492 | DPP-III inhibitor                                    | dipeptidyl peptidase III inhibitor | 1 | DA  | [447-448]                               |
| 9497 | DPP-III inhibitor                                    | dipeptidyl peptidase III inhibitor | 1 | IH  | [111-112]                               |
| 9499 | DPP-III inhibitor                                    | dipeptidyl peptidase III inhibitor | 4 | LA  | [183-184],[241-242],[416-417],[422-423] |
| 9500 | DPP-III inhibitor                                    | dipeptidyl peptidase III inhibitor | 3 | FA  | [21-22],[395-396],[461-462]             |
| 9501 | DPP-III inhibitor                                    | dipeptidyl peptidase III inhibitor | 1 | FR  | [82-83]                                 |
| 9502 | DPP-III inhibitor                                    | dipeptidyl peptidase III inhibitor | 2 | FL  | [13-14],[331-332]                       |
| 9504 | DPP-III inhibitor                                    | dipeptidyl peptidase III inhibitor | 2 | PE  | [100-101],[120-121]                     |
| 9509 | DPP-III inhibitor                                    | dipeptidyl peptidase III inhibitor | 3 | VY  | [103-104],[310-311],[359-360]           |
| 9510 | DPP-III inhibitor                                    | dipeptidyl peptidase III inhibitor | 1 | YI  | [360-361]                               |
| 9512 | DPP-III inhibitor                                    | dipeptidyl peptidase III inhibitor | 1 | GFL | [12-14]                                 |
| 8247 | CaMPDE inhibitor                                     | CaMPDE inhibitor                   | 2 | IR  | [154-155],[383-384]                     |
| 8249 | CaMPDE inhibitor                                     | CaMPDE inhibitor                   | 1 | KF  | [199-200]                               |
| 8250 | CaMPDE inhibitor                                     | CaMPDE inhibitor                   | 1 | EF  | [65-66]                                 |
| 2842 | Renin inhibitor                                      | renin inhibitor                    | 2 | LR  | [197-198],[329-330]                     |

|      |                 |                 |   |    |                                             |
|------|-----------------|-----------------|---|----|---------------------------------------------|
| 8246 | renin inhibitor | renin inhibitor | 2 | IR | [154-155],[383-384]                         |
| 8248 | Renin inhibitor | renin inhibitor | 1 | KF | [199-200]                                   |
| 8251 | Renin inhibitor | renin inhibitor | 1 | EF | [65-66]                                     |
| 9432 | Renin inhibitor | renin inhibitor | 5 | SF | [8-9],[20-21],[244-245],[410-411],[440-441] |
| 9470 | Renin inhibitor | renin inhibitor | 1 | LY | [341-342]                                   |
| 9471 | Renin inhibitor | renin inhibitor | 2 | TF | [122-123],[292-293]                         |

Table S20. Profile of potential biological activity of fragments of protein Pis v 3.0101.

| ID   | Name of peptide                         | Activity      | Number | Sequence | Location                                                    |
|------|-----------------------------------------|---------------|--------|----------|-------------------------------------------------------------|
| 3458 | Prolyl endopeptidase inhibitor          | antiamnestic  | 1      | GPGG     | [257-260]                                                   |
| 3460 | Prolyl endopeptidase inhibitor          | antiamnestic  | 3      | PG       | [66-67],[249-250],[258-259]                                 |
| 3461 | Prolyl endopeptidase inhibitor          | antiamnestic  | 5      | GP       | [257-258],[315-316],[375-376],[414-415],[506-507]           |
| 2653 | ACE inhibitor                           | ACE inhibitor | 1      | VLP      | [149-151]                                                   |
| 3257 | beta-lactokinin                         | ACE inhibitor | 3      | RL       | [70-71],[167-168],[394-395]                                 |
| 3258 | beta-lactokinin                         | ACE inhibitor | 6      | IR       | [202-203],[218-219],[220-221],[306-307],[424-425],[461-462] |
| 3377 | ACE inhibitor (from bovine as1-CN)      | ACE inhibitor | 1      | FGK      | [495-497]                                                   |
| 3380 | ACE inhibitor                           | ACE inhibitor | 1      | RY       | [462-463]                                                   |
| 3381 | ACE inhibitor                           | ACE inhibitor | 1      | LY       | [237-238]                                                   |
| 3384 | ACE inhibitor                           | ACE inhibitor | 4      | VF       | [130-131],[254-255],[429-430],[494-495]                     |
| 3386 | ACE inhibitor                           | ACE inhibitor | 1      | KW       | [508-509]                                                   |
| 3489 | ACE inhibitor from sake lees            | ACE inhibitor | 1      | RF       | [91-92]                                                     |
| 3494 | ACE inhibitor from sake                 | ACE inhibitor | 1      | HY       | [251-252]                                                   |
| 3537 | ACE inhibitor                           | ACE inhibitor | 1      | PR       | [282-283]                                                   |
| 3542 | ACE inhibitor                           | ACE inhibitor | 1      | LQP      | [243-245]                                                   |
| 3547 | ACE inhibitor                           | ACE inhibitor | 2      | IRA      | [220-222],[306-308]                                         |
| 3551 | ACE inhibitor (from bovine beta-Lg)     | ACE inhibitor | 3      | LF       | [289-290],[331-332],[345-346]                               |
| 3553 | ACE inhibitor                           | ACE inhibitor | 1      | YG       | [342-343]                                                   |
| 3556 | ACE inhibitor                           | ACE inhibitor | 3      | FY       | [226-227],[266-267],[377-378]                               |
| 3666 | ACE inhibitor                           | ACE inhibitor | 1      | YP       | [353-354]                                                   |
| 7511 | ACE inhibitor from Alaskan pollack skin | ACE inhibitor | 1      | LPG      | [248-250]                                                   |
| 7512 | ACE inhibitor from Alaskan pollack skin | ACE inhibitor | 5      | GP       | [257-258],[315-316],[375-376],[414-415],[506-507]           |
| 7513 | ACE inhibitor from Alaskan pollack skin | ACE inhibitor | 1      | PL       | [355-356]                                                   |
| 7544 | ACE inhibitor                           | ACE inhibitor | 1      | IW       | [318-319]                                                   |
| 7558 | ACE inhibitor from buckwheat            | ACE inhibitor | 4      | VK       | [140-141],[212-213],[240-241],[299-300]                     |
| 7559 | ACE inhibitor from buckwheat            | ACE inhibitor | 1      | PSY      | [415-417]                                                   |
| 7562 | ACE inhibitor from soy hydrolysate      | ACE inhibitor | 2      | IA       | [385-386],[397-398]                                         |
| 7583 | ACE inhibitor                           | ACE inhibitor | 4      | AF       | [169-170],[177-178],[269-270],[483-484]                     |
| 7585 | ACE inhibitor                           | ACE inhibitor | 3      | LA       | [168-169],[465-466],[482-483]                               |

|      |                           |               |   |     |                                                           |
|------|---------------------------|---------------|---|-----|-----------------------------------------------------------|
| 7586 | ACE inhibitor             | ACE inhibitor | 3 | KR  | [69-70],[155-156],[206-207]                               |
| 7587 | ACE inhibitor             | ACE inhibitor | 2 | VP  | [180-181],[432-433]                                       |
| 7588 | ACE inhibitor             | ACE inhibitor | 5 | RA  | [221-222],[268-269],[307-308],[381-382],[516-517]         |
| 7590 | ACE inhibitor             | ACE inhibitor | 1 | AA  | [277-278]                                                 |
| 7592 | ACE inhibitor             | ACE inhibitor | 1 | FR  | [92-93]                                                   |
| 7593 | ACE inhibitor             | ACE inhibitor | 1 | IF  | [189-190]                                                 |
| 7597 | ACE inhibitor             | ACE inhibitor | 1 | GM  | [372-373]                                                 |
| 7598 | ACE inhibitor             | ACE inhibitor | 1 | GA  | [296-297]                                                 |
| 7599 | ACE inhibitor             | ACE inhibitor | 1 | GL  | [162-163]                                                 |
| 7600 | ACE inhibitor             | ACE inhibitor | 3 | AG  | [222-223],[434-435],[466-467]                             |
| 7601 | ACE inhibitor             | ACE inhibitor | 2 | GH  | [250-251],[435-436]                                       |
| 7602 | ACE inhibitor             | ACE inhibitor | 1 | HL  | [401-402]                                                 |
| 7603 | ACE inhibitor             | ACE inhibitor | 6 | GR  | [40-41],[54-55],[56-57],[195-196],[393-394],[515-516]     |
| 7604 | ACE inhibitor             | ACE inhibitor | 4 | KG  | [29-30],[39-40],[370-371],[487-488]                       |
| 7605 | ACE inhibitor             | ACE inhibitor | 1 | FG  | [495-496]                                                 |
| 7606 | ACE inhibitor             | ACE inhibitor | 1 | DA  | [185-186]                                                 |
| 7607 | ACE inhibitor             | ACE inhibitor | 1 | GS  | [52-53]                                                   |
| 7610 | ACE inhibitor             | ACE inhibitor | 3 | GQ  | [84-85],[343-344],[409-410]                               |
| 7611 | ACE inhibitor             | ACE inhibitor | 4 | GK  | [145-146],[323-324],[467-468],[496-497]                   |
| 7612 | ACE inhibitor             | ACE inhibitor | 3 | GT  | [197-198],[223-224],[327-328]                             |
| 7613 | ACE inhibitor             | ACE inhibitor | 2 | WG  | [51-52],[194-195]                                         |
| 7614 | ACE inhibitor             | ACE inhibitor | 1 | HG  | [256-257]                                                 |
| 7615 | ACE inhibitor             | ACE inhibitor | 5 | GE  | [67-68],[260-261],[313-314],[391-392],[488-489]           |
| 7616 | ACE inhibitor             | ACE inhibitor | 3 | GG  | [83-84],[259-260],[371-372]                               |
| 7617 | ACE inhibitor             | ACE inhibitor | 4 | QG  | [144-145],[214-215],[505-506],[514-515]                   |
| 7618 | ACE inhibitor             | ACE inhibitor | 6 | SG  | [53-54],[374-375],[390-391],[408-409],[413-414],[443-444] |
| 7620 | ACE inhibitor             | ACE inhibitor | 3 | GD  | [58-59],[117-118],[215-216]                               |
| 7621 | ACE inhibitor             | ACE inhibitor | 2 | TG  | [322-323],[326-327]                                       |
| 7622 | ACE inhibitor             | ACE inhibitor | 5 | EG  | [116-117],[295-296],[314-315],[392-393],[458-459]         |
| 7623 | ACE inhibitor             | ACE inhibitor | 2 | EA  | [276-277],[478-479]                                       |
| 7625 | ACE inhibitor             | ACE inhibitor | 3 | PG  | [66-67],[249-250],[258-259]                               |
| 7653 | ACE inhibitor from wakame | ACE inhibitor | 1 | KYY | [33-35]                                                   |

|      |                                           |               |    |     |                                                                                             |
|------|-------------------------------------------|---------------|----|-----|---------------------------------------------------------------------------------------------|
| 7680 | ACE inhibitor from pea vicilin            | ACE inhibitor | 2  | QK  | [23-24],[86-87]                                                                             |
| 7681 | ACE inhibitor from soy                    | ACE inhibitor | 1  | DG  | [82-83]                                                                                     |
| 7682 | ACE inhibitor from garlic                 | ACE inhibitor | 1  | NY  | [341-342]                                                                                   |
| 7684 | ACE inhibitor from garlic                 | ACE inhibitor | 3  | SY  | [106-107],[364-365],[416-417]                                                               |
| 7685 | ACE inhibitor from garlic                 | ACE inhibitor | 1  | SF  | [265-266]                                                                                   |
| 7691 | ACE inhibitor from wakame                 | ACE inhibitor | 3  | KY  | [33-34],[97-98],[165-166]                                                                   |
| 7692 | ACE inhibitor                             | ACE inhibitor | 1  | KF  | [152-153]                                                                                   |
| 7693 | ACE inhibitor from wakame                 | ACE inhibitor | 6  | KL  | [158-159],[236-237],[241-242],[285-286],[288-289],[419-420]                                 |
| 7697 | ACE inhibitor from wakame                 | ACE inhibitor | 3  | YK  | [35-36],[98-99],[417-418]                                                                   |
| 7698 | ACE inhibitor from wakame                 | ACE inhibitor | 1  | NK  | [205-206]                                                                                   |
| 7741 | ACE inhibitor                             | ACE inhibitor | 2  | RR  | [102-103],[311-312]                                                                         |
| 7743 | ACE inhibitor                             | ACE inhibitor | 1  | KA  | [300-301]                                                                                   |
| 7751 | ACE inhibitor from shark meat hydrolysate | ACE inhibitor | 1  | CF  | [452-453]                                                                                   |
| 7826 | ACE inhibitor                             | ACE inhibitor | 2  | EI  | [396-397],[449-450]                                                                         |
| 7827 | ACE inhibitor                             | ACE inhibitor | 1  | IE  | [472-473]                                                                                   |
| 7828 | ACE inhibitor                             | ACE inhibitor | 5  | EV  | [253-254],[273-274],[454-455],[473-474],[490-491]                                           |
| 7830 | ACE inhibitor                             | ACE inhibitor | 1  | TE  | [142-143]                                                                                   |
| 7831 | ACE inhibitor                             | ACE inhibitor | 2  | LQ  | [243-244],[356-357]                                                                         |
| 7836 | ACE inhibitor                             | ACE inhibitor | 1  | PP  | [354-355]                                                                                   |
| 7837 | ACE inhibitor                             | ACE inhibitor | 1  | PQ  | [175-176]                                                                                   |
| 7838 | ACE inhibitor                             | ACE inhibitor | 1  | EW  | [50-51]                                                                                     |
| 7839 | ACE inhibitor                             | ACE inhibitor | 1  | ME  | [475-476]                                                                                   |
| 7840 | ACE inhibitor                             | ACE inhibitor | 10 | EK  | [32-33],[37-38],[68-69],[96-97],[164-165],[235-236],[287-288],[291-292],[411-412],[476-477] |
| 7841 | ACE inhibitor                             | ACE inhibitor | 6  | KE  | [24-25],[36-37],[100-101],[303-304],[477-478],[480-481]                                     |
| 7842 | ACE inhibitor                             | ACE inhibitor | 1  | HP  | [436-437]                                                                                   |
| 7843 | ACE inhibitor                             | ACE inhibitor | 1  | PH  | [400-401]                                                                                   |
| 8185 | ACE inhibitor                             | ACE inhibitor | 1  | TF  | [328-329]                                                                                   |
| 8193 | ACE inhibitor                             | ACE inhibitor | 2  | AI  | [297-298],[386-387]                                                                         |
| 9037 | ACE inhibitor                             | ACE inhibitor | 1  | GKV | [145-147]                                                                                   |
| 9042 | ACE inhibitor                             | ACE inhibitor | 1  | AFL | [169-171]                                                                                   |
| 9053 | ACE inhibitor                             | ACE inhibitor | 1  | FYN | [377-379]                                                                                   |
| 9064 | ACE inhibitor                             | ACE inhibitor | 2  | LEK | [163-165],[286-288]                                                                         |

|      |                                          |                  |    |      |                                                                                                                                                             |
|------|------------------------------------------|------------------|----|------|-------------------------------------------------------------------------------------------------------------------------------------------------------------|
| 9072 | ACE inhibitor                            | ACE inhibitor    | 1  | DY   | [352-353]                                                                                                                                                   |
| 9073 | ACE inhibitor                            | ACE inhibitor    | 2  | TP   | [224-225],[281-282]                                                                                                                                         |
| 9076 | ACE inhibitor                            | ACE inhibitor    | 1  | FQ   | [504-505]                                                                                                                                                   |
| 9077 | ACE inhibitor                            | ACE inhibitor    | 2  | YV   | [129-130],[365-366]                                                                                                                                         |
| 9078 | ACE inhibitor                            | ACE inhibitor    | 1  | YE   | [252-253]                                                                                                                                                   |
| 9079 | ACE inhibitor                            | ACE inhibitor    | 1  | IL   | [450-451]                                                                                                                                                   |
| 9145 | ACE inhibitor                            | ACE inhibitor    | 2  | SGP  | [374-376],[413-415]                                                                                                                                         |
| 9146 | ACE inhibitor                            | ACE inhibitor    | 1  | QGP  | [505-507]                                                                                                                                                   |
| 9173 | ACE inhibitor                            | ACE inhibitor    | 5  | RG   | [55-56],[57-58],[161-162],[196-197],[312-313]                                                                                                               |
| 9184 | ACE inhibitor                            | ACE inhibitor    | 2  | ST   | [62-63],[325-326]                                                                                                                                           |
| 9185 | ACE inhibitor                            | ACE inhibitor    | 1  | YN   | [378-379]                                                                                                                                                   |
| 9213 | ACE inhibitor                            | ACE inhibitor    | 1  | LR   | [160-161]                                                                                                                                                   |
| 9566 | ACE inhibitor                            | ACE inhibitor    | 1  | QP   | [244-245]                                                                                                                                                   |
| 9731 | ACE inhibitor                            | ACE inhibitor    | 1  | VVL  | [148-150]                                                                                                                                                   |
| 9742 | ACE inhibitor                            | ACE inhibitor    | 1  | EKR  | [68-70]                                                                                                                                                     |
| 3283 | Antithrombotic peptide                   | antithrombotic   | 5  | GP   | [257-258],[315-316],[375-376],[414-415],[506-507]                                                                                                           |
| 3285 | Antithrombotic peptide                   | antithrombotic   | 3  | PG   | [66-67],[249-250],[258-259]                                                                                                                                 |
| 3354 | Antithrombotic peptide                   | antithrombotic   | 4  | DEE  | [20-22],[110-112],[118-120],[499-501]                                                                                                                       |
| 3462 |                                          | antithrombotic   | 1  | GPGG | [257-260]                                                                                                                                                   |
| 9660 | Antithrombotic peptide                   | antithrombotic   | 1  | RGD  | [57-59]                                                                                                                                                     |
| 2882 | Immunostimulating peptide                | immunomodulating | 1  | YG   | [342-343]                                                                                                                                                   |
| 3351 | Stimulating vasoactive substance release | stimulating      | 10 | EEE  | [44-46],[45-47],[46-48],[47-49],[48-50],[111-113],[112-114],[113-115],[114-116],[122-124]                                                                   |
| 3355 | Stimulating vasoactive substance release | stimulating      | 2  | SSS  | [403-405],[421-423]                                                                                                                                         |
| 8320 | Glucose uptake stimulating peptide       | stimulating      | 2  | VL   | [149-150],[274-275]                                                                                                                                         |
| 8321 | Glucose uptake stimulating peptide       | stimulating      | 1  | LV   | [171-172]                                                                                                                                                   |
| 8322 | Glucose uptake stimulating peptide       | stimulating      | 4  | IV   | [228-229],[239-240],[298-299],[387-388]                                                                                                                     |
| 8323 | Glucose uptake stimulating peptide       | stimulating      | 1  | IL   | [450-451]                                                                                                                                                   |
| 8325 | Glucose uptake stimulating peptide       | stimulating      | 2  | II   | [217-218],[471-472]                                                                                                                                         |
| 8326 | Glucose uptake stimulating peptide       | stimulating      | 2  | LL   | [159-160],[242-243]                                                                                                                                         |
| 8329 | Stimulating vasoactive substance release | stimulating      | 17 | EE   | [21-22],[44-45],[45-46],[46-47],[47-48],[48-49],[49-50],[111-112],[112-113],[113-114],[114-115],[115-116],[119-120],[122-123],[123-124],[489-490],[500-501] |
| 8330 | Stimulating vasoactive substance release | stimulating      | 1  | SE   | [348-349]                                                                                                                                                   |



|      |                                                                          |                                           |   |      |                                                             |
|------|--------------------------------------------------------------------------|-------------------------------------------|---|------|-------------------------------------------------------------|
| 2890 | neuropeptide                                                             | neuropeptide                              | 3 | GQ   | [84-85],[343-344],[409-410]                                 |
| 9534 | Kyotorphin                                                               | neuropeptide                              | 2 | YR   | [166-167],[267-268]                                         |
| 2749 | peptide regulating ion flow                                              | regulating                                | 1 | DY   | [352-353]                                                   |
| 2753 | peptide regulating the stomach mucosal membrane activity                 | regulating                                | 5 | GP   | [257-258],[315-316],[375-376],[414-415],[506-507]           |
| 2754 | peptide regulating the stomach mucosal membrane activity                 | regulating                                | 3 | PG   | [66-67],[249-250],[258-259]                                 |
| 2755 | peptide regulating the stomach mucosal membrane activity                 | regulating                                | 1 | GPGG | [257-260]                                                   |
| 8318 | Dvl protein binding                                                      | anticancer                                | 1 | VVV  | [147-149]                                                   |
| 3317 |                                                                          | antioxidative                             | 1 | HL   | [401-402]                                                   |
| 7863 | peptide from prawn muscle (Penaeus japonicus)                            | antioxidative                             | 1 | FKK  | [332-334]                                                   |
| 7872 | peptide from soybean protein isolates: beta-conglycinin and glycinin     | antioxidative                             | 1 | LY   | [237-238]                                                   |
| 7888 | antioxidative peptide                                                    | antioxidative                             | 3 | EL   | [5-6],[358-359],[481-482]                                   |
| 7931 | synthetic peptide                                                        | antioxidative                             | 1 | KYY  | [33-35]                                                     |
| 7937 | synthetic peptide                                                        | antioxidative                             | 1 | YYK  | [34-36]                                                     |
| 8029 | synthetic peptide                                                        | antioxidative                             | 1 | PHL  | [400-402]                                                   |
| 8103 | peptide derived from dried bonito                                        | antioxidative                             | 1 | VKL  | [240-242]                                                   |
| 8114 | peptide derived from sardinelle by-products proteins (Sardinella aurita) | antioxidative                             | 1 | GGE  | [259-261]                                                   |
| 8130 | peptide derived from dried bonito                                        | antioxidative                             | 1 | EAK  | [478-480]                                                   |
| 8134 | peptide derived from dried bonito                                        | antioxidative                             | 2 | KD   | [334-335],[351-352]                                         |
| 8139 | synthetic peptide                                                        | antioxidative                             | 1 | PEL  | [4-6]                                                       |
| 8215 | Antioxidative peptide                                                    | antioxidative                             | 6 | IR   | [202-203],[218-219],[220-221],[306-307],[424-425],[461-462] |
| 8217 | Antioxidative peptide                                                    | antioxidative                             | 2 | LK   | [6-7],[279-280]                                             |
| 8484 | Antioxidant peptide from as1-CN (98-100)                                 | antioxidative                             | 1 | LLR  | [159-161]                                                   |
| 9082 | Antioxidative peptide                                                    | antioxidative                             | 2 | WG   | [51-52],[194-195]                                           |
| 9368 | Antioxidative peptide                                                    | antioxidative                             | 1 | EQC  | [25-27]                                                     |
| 3751 |                                                                          | bacterial permease ligand                 | 5 | KK   | [38-39],[99-100],[333-334],[418-419],[468-469]              |
| 3164 | laminin-like peptide                                                     | embryotoxic                               | 1 | RGD  | [57-59]                                                     |
| 4005 |                                                                          | activating ubiquitin-mediated proteolysis | 5 | RA   | [221-222],[268-269],[307-308],[381-382],[516-517]           |
| 4006 | Ubiquitin-mediated proteolysis activating peptide                        | activating ubiquitin-mediated proteolysis | 3 | LA   | [168-169],[465-466],[482-483]                               |

|      |                                                      |                                   |    |     |                                                                                             |
|------|------------------------------------------------------|-----------------------------------|----|-----|---------------------------------------------------------------------------------------------|
| 9580 | Hypolipidemic peptide                                | hypolipidemic                     | 3  | EF  | [60-61],[349-350],[501-502]                                                                 |
| 9548 | Alpha-glucosidase inhibitor                          | alpha-glucosidase inhibitor       | 1  | YP  | [353-354]                                                                                   |
| 9650 | Alpha-glucosidase inhibitor                          | alpha-glucosidase inhibitor       | 2  | EA  | [276-277],[478-479]                                                                         |
| 9651 | Alpha-glucosidase inhibitor                          | alpha-glucosidase inhibitor       | 1  | PP  | [354-355]                                                                                   |
| 9694 | Alpha-glucosidase inhibitor                          | alpha-glucosidase inhibitor       | 2  | PE  | [4-5],[263-264]                                                                             |
| 9695 | Alpha-glucosidase inhibitor                          | alpha-glucosidase inhibitor       | 2  | AD  | [186-187],[517-518]                                                                         |
| 3169 | dipeptidyl peptidase IV inhibitor (DPP IV inhibitor) | dipeptidyl peptidase IV inhibitor | 5  | GP  | [257-258],[315-316],[375-376],[414-415],[506-507]                                           |
| 3170 | dipeptidyl peptidase IV inhibitor (DPP IV inhibitor) | dipeptidyl peptidase IV inhibitor | 1  | PP  | [354-355]                                                                                   |
| 3172 | dipeptidyl peptidase IV inhibitor (DPP IV inhibitor) | dipeptidyl peptidase IV inhibitor | 2  | VA  | [172-173],[441-442]                                                                         |
| 3174 | dipeptidyl peptidase IV inhibitor (DPP IV inhibitor) | dipeptidyl peptidase IV inhibitor | 1  | KA  | [300-301]                                                                                   |
| 3175 | dipeptidyl peptidase IV inhibitor (DPP IV inhibitor) | dipeptidyl peptidase IV inhibitor | 3  | LA  | [168-169],[465-466],[482-483]                                                               |
| 3179 | dipeptidyl peptidase IV inhibitor (DPP IV inhibitor) | dipeptidyl peptidase IV inhibitor | 1  | PA  | [433-434]                                                                                   |
| 3180 | dipeptidyl peptidase IV inhibitor (DPP IV inhibitor) | dipeptidyl peptidase IV inhibitor | 2  | LP  | [150-151],[248-249]                                                                         |
| 3181 | dipeptidyl peptidase IV inhibitor (DPP IV inhibitor) | dipeptidyl peptidase IV inhibitor | 2  | VP  | [180-181],[432-433]                                                                         |
| 3182 | dipeptidyl peptidase IV inhibitor (DPP IV inhibitor) | dipeptidyl peptidase IV inhibitor | 2  | LL  | [159-160],[242-243]                                                                         |
| 3183 | dipeptidyl peptidase IV inhibitor (DPP IV inhibitor) | dipeptidyl peptidase IV inhibitor | 5  | VV  | [147-148],[148-149],[179-180],[388-389],[431-432]                                           |
| 8503 | Dipeptidyl peptidase IV inhibitor (DPP IV inhibitor) | dipeptidyl peptidase IV inhibitor | 2  | TP  | [224-225],[281-282]                                                                         |
| 8504 | Dipeptidyl peptidase IV inhibitor (DPP IV inhibitor) | dipeptidyl peptidase IV inhibitor | 1  | WP  | [319-320]                                                                                   |
| 8520 | dipeptidyl peptidase IV inhibitor (DPP IV inhibitor) | dipeptidyl peptidase IV inhibitor | 1  | HP  | [436-437]                                                                                   |
| 8521 | dipeptidyl peptidase IV inhibitor (DPP IV inhibitor) | dipeptidyl peptidase IV inhibitor | 1  | YP  | [353-354]                                                                                   |
| 8524 | dipeptidyl peptidase IV inhibitor (DPP IV inhibitor) | dipeptidyl peptidase IV inhibitor | 1  | GA  | [296-297]                                                                                   |
| 8525 | dipeptidyl peptidase IV inhibitor (DPP IV inhibitor) | dipeptidyl peptidase IV inhibitor | 2  | IA  | [385-386],[397-398]                                                                         |
| 8526 | dipeptidyl peptidase IV inhibitor (DPP IV inhibitor) | dipeptidyl peptidase IV inhibitor | 5  | RA  | [221-222],[268-269],[307-308],[381-382],[516-517]                                           |
| 8529 | dipeptidyl peptidase IV inhibitor (DPP IV inhibitor) | dipeptidyl peptidase IV inhibitor | 1  | EP  | [65-66]                                                                                     |
| 8530 | dipeptidyl peptidase IV inhibitor (DPP IV inhibitor) | dipeptidyl peptidase IV inhibitor | 3  | NP  | [127-128],[174-175],[262-263]                                                               |
| 8532 | dipeptidyl peptidase IV inhibitor (DPP IV inhibitor) | dipeptidyl peptidase IV inhibitor | 1  | QP  | [244-245]                                                                                   |
| 8555 | dipeptidyl peptidase IV inhibitor (DPP IV inhibitor) | dipeptidyl peptidase IV inhibitor | 1  | FL  | [170-171]                                                                                   |
| 8557 | dipeptidyl peptidase IV inhibitor (DPP IV inhibitor) | dipeptidyl peptidase IV inhibitor | 1  | HL  | [401-402]                                                                                   |
| 8558 | dipeptidyl peptidase IV inhibitor (DPP IV inhibitor) | dipeptidyl peptidase IV inhibitor | 10 | EK  | [32-33],[37-38],[68-69],[96-97],[164-165],[235-236],[287-288],[291-292],[411-412],[476-477] |
| 8559 | dipeptidyl peptidase IV inhibitor (DPP IV inhibitor) | dipeptidyl peptidase IV inhibitor | 1  | AL  | [278-279]                                                                                   |
| 8561 | dipeptidyl peptidase IV inhibitor (DPP IV inhibitor) | dipeptidyl peptidase IV inhibitor | 1  | GL  | [162-163]                                                                                   |
| 8609 | dipeptidyl peptidase IV inhibitor (DPP IV inhibitor) | dipeptidyl peptidase IV inhibitor | 1  | WRQ | [509-511]                                                                                   |

|      |                                                      |                                   |   |     |                                                   |
|------|------------------------------------------------------|-----------------------------------|---|-----|---------------------------------------------------|
| 8637 | dipeptidyl peptidase IV inhibitor (DPP IV inhibitor) | dipeptidyl peptidase IV inhibitor | 1 | AA  | [277-278]                                         |
| 8638 | dipeptidyl peptidase IV inhibitor (DPP IV inhibitor) | dipeptidyl peptidase IV inhibitor | 1 | PL  | [355-356]                                         |
| 8652 | dipeptidyl peptidase IV inhibitor (DPP IV inhibitor) | dipeptidyl peptidase IV inhibitor | 1 | PPL | [354-356]                                         |
| 8675 | dipeptidyl peptidase IV inhibitor (DPP IV inhibitor) | dipeptidyl peptidase IV inhibitor | 1 | WR  | [509-510]                                         |
| 8689 | dipeptidyl peptidase IV inhibitor (DPP IV inhibitor) | dipeptidyl peptidase IV inhibitor | 1 | LQP | [243-245]                                         |
| 8696 | dipeptidyl peptidase IV inhibitor (DPP IV inhibitor) | dipeptidyl peptidase IV inhibitor | 1 | YT  | [463-464]                                         |
| 8697 | dipeptidyl peptidase IV inhibitor (DPP IV inhibitor) | dipeptidyl peptidase IV inhibitor | 2 | WG  | [51-52],[194-195]                                 |
| 8757 | dipeptidyl peptidase IV inhibitor (DPP IV inhibitor) | dipeptidyl peptidase IV inhibitor | 2 | AD  | [186-187],[517-518]                               |
| 8758 | dipeptidyl peptidase IV inhibitor (DPP IV inhibitor) | dipeptidyl peptidase IV inhibitor | 1 | AE  | [457-458]                                         |
| 8759 | dipeptidyl peptidase IV inhibitor (DPP IV inhibitor) | dipeptidyl peptidase IV inhibitor | 4 | AF  | [169-170],[177-178],[269-270],[483-484]           |
| 8760 | dipeptidyl peptidase IV inhibitor (DPP IV inhibitor) | dipeptidyl peptidase IV inhibitor | 3 | AG  | [222-223],[434-435],[466-467]                     |
| 8762 | dipeptidyl peptidase IV inhibitor (DPP IV inhibitor) | dipeptidyl peptidase IV inhibitor | 2 | AS  | [301-302],[442-443]                               |
| 8763 | dipeptidyl peptidase IV inhibitor (DPP IV inhibitor) | dipeptidyl peptidase IV inhibitor | 1 | AT  | [382-383]                                         |
| 8767 | dipeptidyl peptidase IV inhibitor (DPP IV inhibitor) | dipeptidyl peptidase IV inhibitor | 2 | DP  | [3-4],[335-336]                                   |
| 8770 | dipeptidyl peptidase IV inhibitor (DPP IV inhibitor) | dipeptidyl peptidase IV inhibitor | 5 | EG  | [116-117],[295-296],[314-315],[392-393],[458-459] |
| 8771 | dipeptidyl peptidase IV inhibitor (DPP IV inhibitor) | dipeptidyl peptidase IV inhibitor | 2 | EH  | [104-105],[134-135]                               |
| 8772 | dipeptidyl peptidase IV inhibitor (DPP IV inhibitor) | dipeptidyl peptidase IV inhibitor | 2 | EI  | [396-397],[449-450]                               |
| 8773 | dipeptidyl peptidase IV inhibitor (DPP IV inhibitor) | dipeptidyl peptidase IV inhibitor | 3 | ES  | [208-209],[264-265],[347-348]                     |
| 8775 | dipeptidyl peptidase IV inhibitor (DPP IV inhibitor) | dipeptidyl peptidase IV inhibitor | 5 | EV  | [253-254],[273-274],[454-455],[473-474],[490-491] |
| 8776 | dipeptidyl peptidase IV inhibitor (DPP IV inhibitor) | dipeptidyl peptidase IV inhibitor | 1 | EW  | [50-51]                                           |
| 8778 | dipeptidyl peptidase IV inhibitor (DPP IV inhibitor) | dipeptidyl peptidase IV inhibitor | 1 | FN  | [329-330]                                         |
| 8779 | dipeptidyl peptidase IV inhibitor (DPP IV inhibitor) | dipeptidyl peptidase IV inhibitor | 1 | FQ  | [504-505]                                         |
| 8780 | dipeptidyl peptidase IV inhibitor (DPP IV inhibitor) | dipeptidyl peptidase IV inhibitor | 1 | FR  | [92-93]                                           |
| 8781 | dipeptidyl peptidase IV inhibitor (DPP IV inhibitor) | dipeptidyl peptidase IV inhibitor | 5 | GE  | [67-68],[260-261],[313-314],[391-392],[488-489]   |
| 8783 | dipeptidyl peptidase IV inhibitor (DPP IV inhibitor) | dipeptidyl peptidase IV inhibitor | 3 | GG  | [83-84],[259-260],[371-372]                       |
| 8784 | dipeptidyl peptidase IV inhibitor (DPP IV inhibitor) | dipeptidyl peptidase IV inhibitor | 2 | GH  | [250-251],[435-436]                               |
| 8790 | dipeptidyl peptidase IV inhibitor (DPP IV inhibitor) | dipeptidyl peptidase IV inhibitor | 1 | HE  | [64-65]                                           |
| 8791 | dipeptidyl peptidase IV inhibitor (DPP IV inhibitor) | dipeptidyl peptidase IV inhibitor | 1 | HF  | [135-136]                                         |
| 8795 | dipeptidyl peptidase IV inhibitor (DPP IV inhibitor) | dipeptidyl peptidase IV inhibitor | 1 | HS  | [105-106]                                         |
| 8799 | dipeptidyl peptidase IV inhibitor (DPP IV inhibitor) | dipeptidyl peptidase IV inhibitor | 1 | HY  | [251-252]                                         |
| 8801 | dipeptidyl peptidase IV inhibitor (DPP IV inhibitor) | dipeptidyl peptidase IV inhibitor | 2 | II  | [217-218],[471-472]                               |
| 8802 | dipeptidyl peptidase IV inhibitor (DPP IV inhibitor) | dipeptidyl peptidase IV inhibitor | 1 | IL  | [450-451]                                         |

|      |                                                      |                                   |   |    |                                                             |
|------|------------------------------------------------------|-----------------------------------|---|----|-------------------------------------------------------------|
| 8803 | dipeptidyl peptidase IV inhibitor (DPP IV inhibitor) | dipeptidyl peptidase IV inhibitor | 1 | IM | [361-362]                                                   |
| 8806 | dipeptidyl peptidase IV inhibitor (DPP IV inhibitor) | dipeptidyl peptidase IV inhibitor | 6 | IR | [202-203],[218-219],[220-221],[306-307],[424-425],[461-462] |
| 8807 | dipeptidyl peptidase IV inhibitor (DPP IV inhibitor) | dipeptidyl peptidase IV inhibitor | 1 | IW | [318-319]                                                   |
| 8808 | dipeptidyl peptidase IV inhibitor (DPP IV inhibitor) | dipeptidyl peptidase IV inhibitor | 6 | KE | [24-25],[36-37],[100-101],[303-304],[477-478],[480-481]     |
| 8809 | dipeptidyl peptidase IV inhibitor (DPP IV inhibitor) | dipeptidyl peptidase IV inhibitor | 1 | KF | [152-153]                                                   |
| 8810 | dipeptidyl peptidase IV inhibitor (DPP IV inhibitor) | dipeptidyl peptidase IV inhibitor | 4 | KG | [29-30],[39-40],[370-371],[487-488]                         |
| 8811 | dipeptidyl peptidase IV inhibitor (DPP IV inhibitor) | dipeptidyl peptidase IV inhibitor | 1 | KH | [10-11]                                                     |
| 8812 | dipeptidyl peptidase IV inhibitor (DPP IV inhibitor) | dipeptidyl peptidase IV inhibitor | 2 | KI | [201-202],[384-385]                                         |
| 8813 | dipeptidyl peptidase IV inhibitor (DPP IV inhibitor) | dipeptidyl peptidase IV inhibitor | 5 | KK | [38-39],[99-100],[333-334],[418-419],[468-469]              |
| 8814 | dipeptidyl peptidase IV inhibitor (DPP IV inhibitor) | dipeptidyl peptidase IV inhibitor | 3 | KR | [69-70],[155-156],[206-207]                                 |
| 8815 | dipeptidyl peptidase IV inhibitor (DPP IV inhibitor) | dipeptidyl peptidase IV inhibitor | 2 | KS | [324-325],[412-413]                                         |
| 8816 | dipeptidyl peptidase IV inhibitor (DPP IV inhibitor) | dipeptidyl peptidase IV inhibitor | 4 | KT | [1-2],[141-142],[280-281],[485-486]                         |
| 8817 | dipeptidyl peptidase IV inhibitor (DPP IV inhibitor) | dipeptidyl peptidase IV inhibitor | 3 | KV | [14-15],[146-147],[493-494]                                 |
| 8818 | dipeptidyl peptidase IV inhibitor (DPP IV inhibitor) | dipeptidyl peptidase IV inhibitor | 1 | KW | [508-509]                                                   |
| 8819 | dipeptidyl peptidase IV inhibitor (DPP IV inhibitor) | dipeptidyl peptidase IV inhibitor | 3 | KY | [33-34],[97-98],[165-166]                                   |
| 8825 | dipeptidyl peptidase IV inhibitor (DPP IV inhibitor) | dipeptidyl peptidase IV inhibitor | 1 | LV | [171-172]                                                   |
| 8826 | dipeptidyl peptidase IV inhibitor (DPP IV inhibitor) | dipeptidyl peptidase IV inhibitor | 1 | ME | [475-476]                                                   |
| 8831 | dipeptidyl peptidase IV inhibitor (DPP IV inhibitor) | dipeptidyl peptidase IV inhibitor | 1 | MK | [75-76]                                                     |
| 8834 | dipeptidyl peptidase IV inhibitor (DPP IV inhibitor) | dipeptidyl peptidase IV inhibitor | 1 | MN | [210-211]                                                   |
| 8837 | dipeptidyl peptidase IV inhibitor (DPP IV inhibitor) | dipeptidyl peptidase IV inhibitor | 1 | MV | [362-363]                                                   |
| 8839 | dipeptidyl peptidase IV inhibitor (DPP IV inhibitor) | dipeptidyl peptidase IV inhibitor | 1 | NA | [456-457]                                                   |
| 8841 | dipeptidyl peptidase IV inhibitor (DPP IV inhibitor) | dipeptidyl peptidase IV inhibitor | 1 | NE | [234-235]                                                   |
| 8844 | dipeptidyl peptidase IV inhibitor (DPP IV inhibitor) | dipeptidyl peptidase IV inhibitor | 1 | NH | [182-183]                                                   |
| 8845 | dipeptidyl peptidase IV inhibitor (DPP IV inhibitor) | dipeptidyl peptidase IV inhibitor | 3 | NL | [247-248],[330-331],[447-448]                               |
| 8847 | dipeptidyl peptidase IV inhibitor (DPP IV inhibitor) | dipeptidyl peptidase IV inhibitor | 1 | NN | [340-341]                                                   |
| 8848 | dipeptidyl peptidase IV inhibitor (DPP IV inhibitor) | dipeptidyl peptidase IV inhibitor | 1 | NQ | [445-446]                                                   |
| 8850 | dipeptidyl peptidase IV inhibitor (DPP IV inhibitor) | dipeptidyl peptidase IV inhibitor | 1 | NT | [230-231]                                                   |
| 8851 | dipeptidyl peptidase IV inhibitor (DPP IV inhibitor) | dipeptidyl peptidase IV inhibitor | 1 | NV | [211-212]                                                   |
| 8853 | dipeptidyl peptidase IV inhibitor (DPP IV inhibitor) | dipeptidyl peptidase IV inhibitor | 1 | NY | [341-342]                                                   |
| 8854 | dipeptidyl peptidase IV inhibitor (DPP IV inhibitor) | dipeptidyl peptidase IV inhibitor | 4 | PF | [225-226],[320-321],[376-377],[437-438]                     |
| 8855 | dipeptidyl peptidase IV inhibitor (DPP IV inhibitor) | dipeptidyl peptidase IV inhibitor | 3 | PG | [66-67],[249-250],[258-259]                                 |
| 8856 | dipeptidyl peptidase IV inhibitor (DPP IV inhibitor) | dipeptidyl peptidase IV inhibitor | 1 | PH | [400-401]                                                   |

|      |                                                      |                                   |   |    |                                               |
|------|------------------------------------------------------|-----------------------------------|---|----|-----------------------------------------------|
| 8858 | dipeptidyl peptidase IV inhibitor (DPP IV inhibitor) | dipeptidyl peptidase IV inhibitor | 2 | PK | [151-152],[507-508]                           |
| 8860 | dipeptidyl peptidase IV inhibitor (DPP IV inhibitor) | dipeptidyl peptidase IV inhibitor | 1 | PN | [181-182]                                     |
| 8861 | dipeptidyl peptidase IV inhibitor (DPP IV inhibitor) | dipeptidyl peptidase IV inhibitor | 1 | PQ | [175-176]                                     |
| 8862 | dipeptidyl peptidase IV inhibitor (DPP IV inhibitor) | dipeptidyl peptidase IV inhibitor | 3 | PS | [316-317],[336-337],[415-416]                 |
| 8864 | dipeptidyl peptidase IV inhibitor (DPP IV inhibitor) | dipeptidyl peptidase IV inhibitor | 1 | PV | [245-246]                                     |
| 8866 | dipeptidyl peptidase IV inhibitor (DPP IV inhibitor) | dipeptidyl peptidase IV inhibitor | 1 | PY | [128-129]                                     |
| 8867 | dipeptidyl peptidase IV inhibitor (DPP IV inhibitor) | dipeptidyl peptidase IV inhibitor | 1 | QA | [176-177]                                     |
| 8868 | dipeptidyl peptidase IV inhibitor (DPP IV inhibitor) | dipeptidyl peptidase IV inhibitor | 3 | QD | [81-82],[293-294],[498-499]                   |
| 8869 | dipeptidyl peptidase IV inhibitor (DPP IV inhibitor) | dipeptidyl peptidase IV inhibitor | 5 | QE | [43-44],[95-96],[121-122],[357-358],[410-411] |
| 8871 | dipeptidyl peptidase IV inhibitor (DPP IV inhibitor) | dipeptidyl peptidase IV inhibitor | 4 | QG | [144-145],[214-215],[505-506],[514-515]       |
| 8872 | dipeptidyl peptidase IV inhibitor (DPP IV inhibitor) | dipeptidyl peptidase IV inhibitor | 1 | QH | [511-512]                                     |
| 8873 | dipeptidyl peptidase IV inhibitor (DPP IV inhibitor) | dipeptidyl peptidase IV inhibitor | 1 | QI | [305-306]                                     |
| 8874 | dipeptidyl peptidase IV inhibitor (DPP IV inhibitor) | dipeptidyl peptidase IV inhibitor | 2 | QL | [88-89],[344-345]                             |
| 8875 | dipeptidyl peptidase IV inhibitor (DPP IV inhibitor) | dipeptidyl peptidase IV inhibitor | 1 | QN | [446-447]                                     |
| 8876 | dipeptidyl peptidase IV inhibitor (DPP IV inhibitor) | dipeptidyl peptidase IV inhibitor | 2 | QQ | [85-86],[513-514]                             |
| 8877 | dipeptidyl peptidase IV inhibitor (DPP IV inhibitor) | dipeptidyl peptidase IV inhibitor | 1 | QS | [338-339]                                     |
| 8881 | dipeptidyl peptidase IV inhibitor (DPP IV inhibitor) | dipeptidyl peptidase IV inhibitor | 1 | QY | [18-19]                                       |
| 8882 | dipeptidyl peptidase IV inhibitor (DPP IV inhibitor) | dipeptidyl peptidase IV inhibitor | 5 | RG | [55-56],[57-58],[161-162],[196-197],[312-313] |
| 8884 | dipeptidyl peptidase IV inhibitor (DPP IV inhibitor) | dipeptidyl peptidase IV inhibitor | 1 | RI | [219-220]                                     |
| 8886 | dipeptidyl peptidase IV inhibitor (DPP IV inhibitor) | dipeptidyl peptidase IV inhibitor | 3 | RL | [70-71],[167-168],[394-395]                   |
| 8889 | dipeptidyl peptidase IV inhibitor (DPP IV inhibitor) | dipeptidyl peptidase IV inhibitor | 2 | RR | [102-103],[311-312]                           |
| 8891 | dipeptidyl peptidase IV inhibitor (DPP IV inhibitor) | dipeptidyl peptidase IV inhibitor | 1 | SF | [265-266]                                     |
| 8893 | dipeptidyl peptidase IV inhibitor (DPP IV inhibitor) | dipeptidyl peptidase IV inhibitor | 3 | SI | [188-189],[317-318],[423-424]                 |
| 8894 | dipeptidyl peptidase IV inhibitor (DPP IV inhibitor) | dipeptidyl peptidase IV inhibitor | 3 | SK | [157-158],[302-303],[405-406]                 |
| 8895 | dipeptidyl peptidase IV inhibitor (DPP IV inhibitor) | dipeptidyl peptidase IV inhibitor | 1 | SV | [428-429]                                     |
| 8896 | dipeptidyl peptidase IV inhibitor (DPP IV inhibitor) | dipeptidyl peptidase IV inhibitor | 1 | SW | [193-194]                                     |
| 8897 | dipeptidyl peptidase IV inhibitor (DPP IV inhibitor) | dipeptidyl peptidase IV inhibitor | 3 | SY | [106-107],[364-365],[416-417]                 |
| 8898 | dipeptidyl peptidase IV inhibitor (DPP IV inhibitor) | dipeptidyl peptidase IV inhibitor | 3 | TD | [2-3],[231-232],[426-427]                     |
| 8899 | dipeptidyl peptidase IV inhibitor (DPP IV inhibitor) | dipeptidyl peptidase IV inhibitor | 1 | TE | [142-143]                                     |
| 8900 | dipeptidyl peptidase IV inhibitor (DPP IV inhibitor) | dipeptidyl peptidase IV inhibitor | 1 | TF | [328-329]                                     |
| 8901 | dipeptidyl peptidase IV inhibitor (DPP IV inhibitor) | dipeptidyl peptidase IV inhibitor | 2 | TG | [322-323],[326-327]                           |
| 8902 | dipeptidyl peptidase IV inhibitor (DPP IV inhibitor) | dipeptidyl peptidase IV inhibitor | 1 | TH | [63-64]                                       |

|      |                                                      |                                   |   |    |                                                   |
|------|------------------------------------------------------|-----------------------------------|---|----|---------------------------------------------------|
| 8903 | dipeptidyl peptidase IV inhibitor (DPP IV inhibitor) | dipeptidyl peptidase IV inhibitor | 1 | TI | [198-199]                                         |
| 8904 | dipeptidyl peptidase IV inhibitor (DPP IV inhibitor) | dipeptidyl peptidase IV inhibitor | 5 | TK | [154-155],[200-201],[369-370],[383-384],[486-487] |
| 8905 | dipeptidyl peptidase IV inhibitor (DPP IV inhibitor) | dipeptidyl peptidase IV inhibitor | 1 | TL | [464-465]                                         |
| 8909 | dipeptidyl peptidase IV inhibitor (DPP IV inhibitor) | dipeptidyl peptidase IV inhibitor | 1 | TR | [138-139]                                         |
| 8911 | dipeptidyl peptidase IV inhibitor (DPP IV inhibitor) | dipeptidyl peptidase IV inhibitor | 1 | TT | [137-138]                                         |

Table S21. Profile of potential biological activity of fragments of protein Pis v 4.0101.

| ID   | Name of peptide                         | Activity      | Number | Sequence | Location                      |
|------|-----------------------------------------|---------------|--------|----------|-------------------------------|
| 3166 | Diprotin B                              | antiamnestic  | 1      | VPL      | [185-187]                     |
| 3461 | Prolyl endopeptidase inhibitor          | antiamnestic  | 1      | GP       | [181-182]                     |
| 3257 | beta-lactokinin                         | ACE inhibitor | 1      | RL       | [17-18]                       |
| 3381 | ACE inhibitor                           | ACE inhibitor | 1      | LY       | [224-225]                     |
| 3404 | ACE inhibitor                           | ACE inhibitor | 1      | VRP      | [204-206]                     |
| 3486 | ACE inhibitor from sake lees            | ACE inhibitor | 2      | VW       | [155-156],[192-193]           |
| 3553 | ACE inhibitor                           | ACE inhibitor | 1      | YG       | [39-40]                       |
| 3563 | ACE inhibitor                           | ACE inhibitor | 1      | AY       | [196-197]                     |
| 7512 | ACE inhibitor from Alaskan pollack skin | ACE inhibitor | 1      | GP       | [181-182]                     |
| 7513 | ACE inhibitor from Alaskan pollack skin | ACE inhibitor | 2      | PL       | [176-177],[186-187]           |
| 7542 | ACE inhibitor                           | ACE inhibitor | 1      | DLP      | [34-36]                       |
| 7544 | ACE inhibitor                           | ACE inhibitor | 1      | IW       | [212-213]                     |
| 7554 | ACE inhibitor from Tricholoma giganteum | ACE inhibitor | 1      | GEP      | [117-119]                     |
| 7558 | ACE inhibitor from buckwheat            | ACE inhibitor | 1      | VK       | [86-87]                       |
| 7579 | ACE inhibitor                           | ACE inhibitor | 2      | GW       | [125-126],[153-154]           |
| 7582 | ACE inhibitor                           | ACE inhibitor | 1      | RP       | [205-206]                     |
| 7587 | ACE inhibitor                           | ACE inhibitor | 1      | VP       | [185-186]                     |
| 7589 | ACE inhibitor                           | ACE inhibitor | 1      | YA       | [220-221]                     |
| 7590 | ACE inhibitor                           | ACE inhibitor | 1      | AA       | [147-148]                     |
| 7593 | ACE inhibitor                           | ACE inhibitor | 1      | IF       | [104-105]                     |
| 7596 | ACE inhibitor                           | ACE inhibitor | 1      | GI       | [189-190]                     |
| 7598 | ACE inhibitor                           | ACE inhibitor | 2      | GA       | [40-41],[146-147]             |
| 7599 | ACE inhibitor                           | ACE inhibitor | 3      | GL       | [19-20],[26-27],[158-159]     |
| 7600 | ACE inhibitor                           | ACE inhibitor | 1      | AG       | [221-222]                     |
| 7601 | ACE inhibitor                           | ACE inhibitor | 1      | GH       | [98-99]                       |
| 7604 | ACE inhibitor                           | ACE inhibitor | 2      | KG       | [79-80],[180-181]             |
| 7605 | ACE inhibitor                           | ACE inhibitor | 1      | FG       | [132-133]                     |
| 7606 | ACE inhibitor                           | ACE inhibitor | 1      | DA       | [81-82]                       |
| 7607 | ACE inhibitor                           | ACE inhibitor | 3      | GS       | [122-123],[133-134],[151-152] |

|      |                                           |               |   |      |                                       |
|------|-------------------------------------------|---------------|---|------|---------------------------------------|
| 7614 | ACE inhibitor                             | ACE inhibitor | 1 | HG   | [121-122]                             |
| 7615 | ACE inhibitor                             | ACE inhibitor | 2 | GE   | [117-118],[222-223]                   |
| 7616 | ACE inhibitor                             | ACE inhibitor | 4 | GG   | [96-97],[97-98],[115-116],[116-117]   |
| 7617 | ACE inhibitor                             | ACE inhibitor | 1 | QG   | [150-151]                             |
| 7618 | ACE inhibitor                             | ACE inhibitor | 1 | SG   | [152-153]                             |
| 7619 | ACE inhibitor                             | ACE inhibitor | 4 | LG   | [18-19],[124-125],[157-158],[188-189] |
| 7620 | ACE inhibitor                             | ACE inhibitor | 1 | GD   | [80-81]                               |
| 7622 | ACE inhibitor                             | ACE inhibitor | 2 | EG   | [114-115],[145-146]                   |
| 7623 | ACE inhibitor                             | ACE inhibitor | 1 | EA   | [136-137]                             |
| 7624 | ACE inhibitor                             | ACE inhibitor | 1 | NG   | [95-96]                               |
| 7628 | ACE inhibitor from k-CN (fr. 67-68)       | ACE inhibitor | 2 | VR   | [24-25],[204-205]                     |
| 7655 | ACE inhibitor from wakame                 | ACE inhibitor | 1 | YNK  | [66-68]                               |
| 7680 | ACE inhibitor from pea vicilin            | ACE inhibitor | 2 | QK   | [56-57],[226-227]                     |
| 7682 | ACE inhibitor from garlic                 | ACE inhibitor | 1 | NY   | [65-66]                               |
| 7683 | ACE inhibitor from garlic                 | ACE inhibitor | 1 | NF   | [131-132]                             |
| 7684 | ACE inhibitor from garlic                 | ACE inhibitor | 1 | SY   | [5-6]                                 |
| 7691 | ACE inhibitor from wakame                 | ACE inhibitor | 1 | KY   | [219-220]                             |
| 7692 | ACE inhibitor                             | ACE inhibitor | 1 | KF   | [93-94]                               |
| 7693 | ACE inhibitor from wakame                 | ACE inhibitor | 2 | KL   | [87-88],[165-166]                     |
| 7697 | ACE inhibitor from wakame                 | ACE inhibitor | 1 | YK   | [201-202]                             |
| 7698 | ACE inhibitor from wakame                 | ACE inhibitor | 2 | NK   | [67-68],[78-79]                       |
| 7743 | ACE inhibitor                             | ACE inhibitor | 1 | KA   | [68-69]                               |
| 7752 | ACE inhibitor from shark meat hydrolysate | ACE inhibitor | 1 | EY   | [38-39]                               |
| 7826 | ACE inhibitor                             | ACE inhibitor | 1 | EI   | [49-50]                               |
| 7829 | ACE inhibitor                             | ACE inhibitor | 1 | VE   | [168-169]                             |
| 7830 | ACE inhibitor                             | ACE inhibitor | 1 | TE   | [13-14]                               |
| 7831 | ACE inhibitor                             | ACE inhibitor | 4 | LQ   | [27-28],[88-89],[149-150],[199-200]   |
| 7836 | ACE inhibitor                             | ACE inhibitor | 1 | PP   | [119-120]                             |
| 7839 | ACE inhibitor                             | ACE inhibitor | 1 | ME   | [135-136]                             |
| 7841 | ACE inhibitor                             | ACE inhibitor | 2 | KE   | [161-162],[227-228]                   |
| 7843 | ACE inhibitor                             | ACE inhibitor | 1 | PH   | [120-121]                             |
| 8182 | ACE Inhibitor                             | ACE inhibitor | 1 | ALEP | [41-44]                               |



|      |                                                                      |                  |   |     |                                   |
|------|----------------------------------------------------------------------|------------------|---|-----|-----------------------------------|
| 8185 | ACE inhibitor                                                        | ACE inhibitor    | 1 | TF  | [29-30]                           |
| 8193 | ACE inhibitor                                                        | ACE inhibitor    | 4 | AI  | [45-46],[76-77],[91-92],[127-128] |
| 8951 | ACE inhibitor                                                        | ACE inhibitor    | 1 | AV  | [84-85]                           |
| 9061 | ACE inhibitor                                                        | ACE inhibitor    | 1 | LGI | [188-190]                         |
| 9068 | ACE inhibitor                                                        | ACE inhibitor    | 1 | VTR | [7-9]                             |
| 9072 | ACE inhibitor                                                        | ACE inhibitor    | 1 | DY  | [207-208]                         |
| 9073 | ACE inhibitor                                                        | ACE inhibitor    | 1 | TP  | [110-111]                         |
| 9077 | ACE inhibitor                                                        | ACE inhibitor    | 1 | YV  | [6-7]                             |
| 9078 | ACE inhibitor                                                        | ACE inhibitor    | 1 | YE  | [37-38]                           |
| 9089 | ACE inhibitor                                                        | ACE inhibitor    | 1 | WA  | [126-127]                         |
| 9107 | ACE inhibitor                                                        | ACE inhibitor    | 1 | WL  | [156-157]                         |
| 9148 | ACE inhibitor                                                        | ACE inhibitor    | 1 | KGP | [180-182]                         |
| 9173 | ACE inhibitor                                                        | ACE inhibitor    | 1 | RG  | [25-26]                           |
| 9185 | ACE inhibitor                                                        | ACE inhibitor    | 1 | YN  | [66-67]                           |
| 9196 | ACE inhibitor                                                        | ACE inhibitor    | 1 | AVV | [84-86]                           |
| 9213 | ACE inhibitor                                                        | ACE inhibitor    | 1 | LR  | [16-17]                           |
| 3283 | Antithrombotic peptide                                               | antithrombotic   | 1 | GP  | [181-182]                         |
| 2882 | Immunostimulating peptide                                            | immunomodulating | 1 | YG  | [39-40]                           |
| 3350 | Stimulating vasoactive substance release                             | stimulating      | 1 | VPL | [185-187]                         |
| 8321 | Glucose uptake stimulating peptide                                   | stimulating      | 3 | LV  | [166-167],[177-178],[184-185]     |
| 8324 | Glucose uptake stimulating peptide                                   | stimulating      | 1 | LI  | [138-139]                         |
| 8326 | Glucose uptake stimulating peptide                                   | stimulating      | 2 | LL  | [3-4],[187-188]                   |
| 8330 | Stimulating vasoactive substance release                             | stimulating      | 2 | SE  | [48-49],[113-114]                 |
| 8310 | Anxiolytic peptide                                                   | neuropeptide     | 2 | YL  | [198-199],[208-209]               |
| 2749 | peptide regulating ion flow                                          | regulating       | 1 | DY  | [207-208]                         |
| 2753 | peptide regulating the stomach mucosal membrane activity             | regulating       | 1 | GP  | [181-182]                         |
| 3302 |                                                                      | antioxidative    | 1 | LHH | [53-55]                           |
| 3305 |                                                                      | antioxidative    | 1 | LH  | [53-54]                           |
| 3319 |                                                                      | antioxidative    | 2 | HH  | [54-55],[58-59]                   |
| 7866 | peptide from Okara protein                                           | antioxidative    | 1 | AY  | [196-197]                         |
| 7872 | peptide from soybean protein isolates: beta-conglycinin and glycinin | antioxidative    | 1 | LY  | [224-225]                         |
| 7888 | antioxidative peptide                                                | antioxidative    | 1 | EL  | [223-224]                         |

|      |                                                                                   |                                           |   |      |                     |
|------|-----------------------------------------------------------------------------------|-------------------------------------------|---|------|---------------------|
| 7928 | synthetic peptide                                                                 | antioxidative                             | 1 | YFY  | [37-39]             |
| 7941 | synthetic peptide                                                                 | antioxidative                             | 1 | YYL  | [197-199]           |
| 7953 | synthetic peptide                                                                 | antioxidative                             | 1 | AYY  | [196-198]           |
| 7986 | synthetic peptide                                                                 | antioxidative                             | 1 | KHH  | [57-59]             |
| 8026 | synthetic peptide                                                                 | antioxidative                             | 1 | PHG  | [120-122]           |
| 8103 | peptide derived from dried bonito                                                 | antioxidative                             | 1 | VKL  | [86-88]             |
| 8104 | peptide derived from dried bonito                                                 | antioxidative                             | 1 | VVKL | [85-88]             |
| 8114 | peptide derived from sardinelle by-products proteins ( <i>Sardinella aurita</i> ) | antioxidative                             | 1 | GGE  | [116-118]           |
| 8133 | peptide derived from dried bonito                                                 | antioxidative                             | 1 | KVI  | [214-216]           |
| 8217 | Antioxidative peptide                                                             | antioxidative                             | 2 | LK   | [20-21],[209-210]   |
| 8219 | antioxidative peptide                                                             | antioxidative                             | 1 | TY   | [61-62]             |
| 8461 | Antioxidant peptide from marine bivalve ( <i>Macra veneriformis</i> )             | antioxidative                             | 2 | VW   | [155-156],[192-193] |
| 8983 | Antioxidative peptide                                                             | antioxidative                             | 1 | GAA  | [146-148]           |
| 3751 |                                                                                   | bacterial permease ligand                 | 1 | KK   | [164-165]           |
| 4007 | Peptide activating ubiquitin-mediated proteolysis                                 | activating ubiquitin-mediated proteolysis | 1 | WA   | [126-127]           |
| 9387 | Alpha-glucosidase inhibitor                                                       | alpha-glucosidase inhibitor               | 2 | VW   | [155-156],[192-193] |
| 9650 | Alpha-glucosidase inhibitor                                                       | alpha-glucosidase inhibitor               | 1 | EA   | [136-137]           |
| 9651 | Alpha-glucosidase inhibitor                                                       | alpha-glucosidase inhibitor               | 1 | PP   | [119-120]           |
| 9693 | Alpha-glucosidase inhibitor                                                       | alpha-glucosidase inhibitor               | 1 | VE   | [168-169]           |
| 3169 | dipeptidyl peptidase IV inhibitor (DPP IV inhibitor)                              | dipeptidyl peptidase IV inhibitor         | 1 | GP   | [181-182]           |
| 3170 | dipeptidyl peptidase IV inhibitor (DPP IV inhibitor)                              | dipeptidyl peptidase IV inhibitor         | 1 | PP   | [119-120]           |
| 3173 | dipeptidyl peptidase IV inhibitor (DPP IV inhibitor)                              | dipeptidyl peptidase IV inhibitor         | 1 | MA   | [1-2]               |
| 3174 | dipeptidyl peptidase IV inhibitor (DPP IV inhibitor)                              | dipeptidyl peptidase IV inhibitor         | 1 | KA   | [68-69]             |
| 3179 | dipeptidyl peptidase IV inhibitor (DPP IV inhibitor)                              | dipeptidyl peptidase IV inhibitor         | 1 | PA   | [44-45]             |
| 3180 | dipeptidyl peptidase IV inhibitor (DPP IV inhibitor)                              | dipeptidyl peptidase IV inhibitor         | 2 | LP   | [32-33],[35-36]     |
| 3181 | dipeptidyl peptidase IV inhibitor (DPP IV inhibitor)                              | dipeptidyl peptidase IV inhibitor         | 1 | VP   | [185-186]           |
| 3182 | dipeptidyl peptidase IV inhibitor (DPP IV inhibitor)                              | dipeptidyl peptidase IV inhibitor         | 2 | LL   | [3-4],[187-188]     |
| 3183 | dipeptidyl peptidase IV inhibitor (DPP IV inhibitor)                              | dipeptidyl peptidase IV inhibitor         | 2 | VV   | [85-86],[167-168]   |
| 3184 | dipeptidyl peptidase IV inhibitor (DPP IV inhibitor)                              | dipeptidyl peptidase IV inhibitor         | 1 | HA   | [195-196]           |
| 8347 | dipeptidyl peptidase IV inhibitor (DPP-IV inhibitor)                              | dipeptidyl peptidase IV inhibitor         | 1 | VPL  | [185-187]           |
| 8503 | Dipeptidyl peptidase IV inhibitor (DPP IV inhibitor)                              | dipeptidyl peptidase IV inhibitor         | 1 | TP   | [110-111]           |
| 8518 | dipeptidyl peptidase IV inhibitor (DPP IV inhibitor)                              | dipeptidyl peptidase IV inhibitor         | 1 | RP   | [205-206]           |

|      |                                                      |                                   |   |    |                                           |
|------|------------------------------------------------------|-----------------------------------|---|----|-------------------------------------------|
| 8524 | dipeptidyl peptidase IV inhibitor (DPP IV inhibitor) | dipeptidyl peptidase IV inhibitor | 2 | GA | [40-41],[146-147]                         |
| 8528 | dipeptidyl peptidase IV inhibitor (DPP IV inhibitor) | dipeptidyl peptidase IV inhibitor | 1 | WA | [126-127]                                 |
| 8529 | dipeptidyl peptidase IV inhibitor (DPP IV inhibitor) | dipeptidyl peptidase IV inhibitor | 2 | EP | [43-44],[118-119]                         |
| 8531 | dipeptidyl peptidase IV inhibitor (DPP IV inhibitor) | dipeptidyl peptidase IV inhibitor | 1 | TA | [171-172]                                 |
| 8556 | dipeptidyl peptidase IV inhibitor (DPP IV inhibitor) | dipeptidyl peptidase IV inhibitor | 1 | WV | [154-155]                                 |
| 8559 | dipeptidyl peptidase IV inhibitor (DPP IV inhibitor) | dipeptidyl peptidase IV inhibitor | 5 | AL | [2-3],[41-42],[69-70],[137-138],[148-149] |
| 8560 | dipeptidyl peptidase IV inhibitor (DPP IV inhibitor) | dipeptidyl peptidase IV inhibitor | 3 | SL | [15-16],[123-124],[183-184]               |
| 8561 | dipeptidyl peptidase IV inhibitor (DPP IV inhibitor) | dipeptidyl peptidase IV inhibitor | 3 | GL | [19-20],[26-27],[158-159]                 |
| 8594 | dipeptidyl peptidase IV inhibitor (DPP IV inhibitor) | dipeptidyl peptidase IV inhibitor | 2 | VR | [24-25],[204-205]                         |
| 8637 | dipeptidyl peptidase IV inhibitor (DPP IV inhibitor) | dipeptidyl peptidase IV inhibitor | 1 | AA | [147-148]                                 |
| 8638 | dipeptidyl peptidase IV inhibitor (DPP IV inhibitor) | dipeptidyl peptidase IV inhibitor | 2 | PL | [176-177],[186-187]                       |
| 8676 | dipeptidyl peptidase IV inhibitor (DPP IV inhibitor) | dipeptidyl peptidase IV inhibitor | 3 | WK | [106-107],[213-214],[218-219]             |
| 8677 | dipeptidyl peptidase IV inhibitor (DPP IV inhibitor) | dipeptidyl peptidase IV inhibitor | 1 | WL | [156-157]                                 |
| 8691 | dipeptidyl peptidase IV inhibitor (DPP IV inhibitor) | dipeptidyl peptidase IV inhibitor | 1 | WE | [193-194]                                 |
| 8758 | dipeptidyl peptidase IV inhibitor (DPP IV inhibitor) | dipeptidyl peptidase IV inhibitor | 1 | AE | [144-145]                                 |
| 8760 | dipeptidyl peptidase IV inhibitor (DPP IV inhibitor) | dipeptidyl peptidase IV inhibitor | 1 | AG | [221-222]                                 |
| 8762 | dipeptidyl peptidase IV inhibitor (DPP IV inhibitor) | dipeptidyl peptidase IV inhibitor | 1 | AS | [82-83]                                   |
| 8764 | dipeptidyl peptidase IV inhibitor (DPP IV inhibitor) | dipeptidyl peptidase IV inhibitor | 1 | AV | [84-85]                                   |
| 8765 | dipeptidyl peptidase IV inhibitor (DPP IV inhibitor) | dipeptidyl peptidase IV inhibitor | 1 | AY | [196-197]                                 |
| 8767 | dipeptidyl peptidase IV inhibitor (DPP IV inhibitor) | dipeptidyl peptidase IV inhibitor | 1 | DP | [175-176]                                 |
| 8768 | dipeptidyl peptidase IV inhibitor (DPP IV inhibitor) | dipeptidyl peptidase IV inhibitor | 1 | DQ | [74-75]                                   |
| 8770 | dipeptidyl peptidase IV inhibitor (DPP IV inhibitor) | dipeptidyl peptidase IV inhibitor | 2 | EG | [114-115],[145-146]                       |
| 8771 | dipeptidyl peptidase IV inhibitor (DPP IV inhibitor) | dipeptidyl peptidase IV inhibitor | 1 | EH | [194-195]                                 |
| 8772 | dipeptidyl peptidase IV inhibitor (DPP IV inhibitor) | dipeptidyl peptidase IV inhibitor | 1 | EI | [49-50]                                   |
| 8773 | dipeptidyl peptidase IV inhibitor (DPP IV inhibitor) | dipeptidyl peptidase IV inhibitor | 2 | ES | [14-15],[162-163]                         |
| 8774 | dipeptidyl peptidase IV inhibitor (DPP IV inhibitor) | dipeptidyl peptidase IV inhibitor | 1 | ET | [169-170]                                 |
| 8777 | dipeptidyl peptidase IV inhibitor (DPP IV inhibitor) | dipeptidyl peptidase IV inhibitor | 1 | EY | [38-39]                                   |
| 8778 | dipeptidyl peptidase IV inhibitor (DPP IV inhibitor) | dipeptidyl peptidase IV inhibitor | 1 | FN | [94-95]                                   |
| 8781 | dipeptidyl peptidase IV inhibitor (DPP IV inhibitor) | dipeptidyl peptidase IV inhibitor | 2 | GE | [117-118],[222-223]                       |
| 8783 | dipeptidyl peptidase IV inhibitor (DPP IV inhibitor) | dipeptidyl peptidase IV inhibitor | 4 | GG | [96-97],[97-98],[115-116],[116-117]       |
| 8784 | dipeptidyl peptidase IV inhibitor (DPP IV inhibitor) | dipeptidyl peptidase IV inhibitor | 1 | GH | [98-99]                                   |
| 8785 | dipeptidyl peptidase IV inhibitor (DPP IV inhibitor) | dipeptidyl peptidase IV inhibitor | 1 | GI | [189-190]                                 |

|      |                                                      |                                   |   |    |                               |
|------|------------------------------------------------------|-----------------------------------|---|----|-------------------------------|
| 8787 | dipeptidyl peptidase IV inhibitor (DPP IV inhibitor) | dipeptidyl peptidase IV inhibitor | 2 | GW | [125-126],[153-154]           |
| 8792 | dipeptidyl peptidase IV inhibitor (DPP IV inhibitor) | dipeptidyl peptidase IV inhibitor | 2 | HH | [54-55],[58-59]               |
| 8793 | dipeptidyl peptidase IV inhibitor (DPP IV inhibitor) | dipeptidyl peptidase IV inhibitor | 1 | HI | [99-100]                      |
| 8795 | dipeptidyl peptidase IV inhibitor (DPP IV inhibitor) | dipeptidyl peptidase IV inhibitor | 1 | HS | [102-103]                     |
| 8797 | dipeptidyl peptidase IV inhibitor (DPP IV inhibitor) | dipeptidyl peptidase IV inhibitor | 1 | HV | [23-24]                       |
| 8803 | dipeptidyl peptidase IV inhibitor (DPP IV inhibitor) | dipeptidyl peptidase IV inhibitor | 1 | IM | [50-51]                       |
| 8804 | dipeptidyl peptidase IV inhibitor (DPP IV inhibitor) | dipeptidyl peptidase IV inhibitor | 3 | IN | [77-78],[100-101],[216-217]   |
| 8805 | dipeptidyl peptidase IV inhibitor (DPP IV inhibitor) | dipeptidyl peptidase IV inhibitor | 1 | IQ | [139-140]                     |
| 8807 | dipeptidyl peptidase IV inhibitor (DPP IV inhibitor) | dipeptidyl peptidase IV inhibitor | 1 | IW | [212-213]                     |
| 8808 | dipeptidyl peptidase IV inhibitor (DPP IV inhibitor) | dipeptidyl peptidase IV inhibitor | 2 | KE | [161-162],[227-228]           |
| 8809 | dipeptidyl peptidase IV inhibitor (DPP IV inhibitor) | dipeptidyl peptidase IV inhibitor | 1 | KF | [93-94]                       |
| 8810 | dipeptidyl peptidase IV inhibitor (DPP IV inhibitor) | dipeptidyl peptidase IV inhibitor | 2 | KG | [79-80],[180-181]             |
| 8811 | dipeptidyl peptidase IV inhibitor (DPP IV inhibitor) | dipeptidyl peptidase IV inhibitor | 1 | KH | [57-58]                       |
| 8813 | dipeptidyl peptidase IV inhibitor (DPP IV inhibitor) | dipeptidyl peptidase IV inhibitor | 1 | KK | [164-165]                     |
| 8815 | dipeptidyl peptidase IV inhibitor (DPP IV inhibitor) | dipeptidyl peptidase IV inhibitor | 1 | KS | [21-22]                       |
| 8816 | dipeptidyl peptidase IV inhibitor (DPP IV inhibitor) | dipeptidyl peptidase IV inhibitor | 1 | KT | [10-11]                       |
| 8817 | dipeptidyl peptidase IV inhibitor (DPP IV inhibitor) | dipeptidyl peptidase IV inhibitor | 1 | KV | [214-215]                     |
| 8819 | dipeptidyl peptidase IV inhibitor (DPP IV inhibitor) | dipeptidyl peptidase IV inhibitor | 1 | KY | [219-220]                     |
| 8820 | dipeptidyl peptidase IV inhibitor (DPP IV inhibitor) | dipeptidyl peptidase IV inhibitor | 1 | LH | [53-54]                       |
| 8821 | dipeptidyl peptidase IV inhibitor (DPP IV inhibitor) | dipeptidyl peptidase IV inhibitor | 1 | LI | [138-139]                     |
| 8824 | dipeptidyl peptidase IV inhibitor (DPP IV inhibitor) | dipeptidyl peptidase IV inhibitor | 2 | LT | [12-13],[109-110]             |
| 8825 | dipeptidyl peptidase IV inhibitor (DPP IV inhibitor) | dipeptidyl peptidase IV inhibitor | 3 | LV | [166-167],[177-178],[184-185] |
| 8826 | dipeptidyl peptidase IV inhibitor (DPP IV inhibitor) | dipeptidyl peptidase IV inhibitor | 1 | ME | [135-136]                     |
| 8834 | dipeptidyl peptidase IV inhibitor (DPP IV inhibitor) | dipeptidyl peptidase IV inhibitor | 1 | MN | [142-143]                     |
| 8835 | dipeptidyl peptidase IV inhibitor (DPP IV inhibitor) | dipeptidyl peptidase IV inhibitor | 1 | MQ | [51-52]                       |
| 8839 | dipeptidyl peptidase IV inhibitor (DPP IV inhibitor) | dipeptidyl peptidase IV inhibitor | 1 | NA | [143-144]                     |
| 8842 | dipeptidyl peptidase IV inhibitor (DPP IV inhibitor) | dipeptidyl peptidase IV inhibitor | 1 | NF | [131-132]                     |
| 8843 | dipeptidyl peptidase IV inhibitor (DPP IV inhibitor) | dipeptidyl peptidase IV inhibitor | 1 | NG | [95-96]                       |
| 8844 | dipeptidyl peptidase IV inhibitor (DPP IV inhibitor) | dipeptidyl peptidase IV inhibitor | 1 | NH | [101-102]                     |
| 8845 | dipeptidyl peptidase IV inhibitor (DPP IV inhibitor) | dipeptidyl peptidase IV inhibitor | 1 | NL | [108-109]                     |
| 8848 | dipeptidyl peptidase IV inhibitor (DPP IV inhibitor) | dipeptidyl peptidase IV inhibitor | 1 | NQ | [173-174]                     |
| 8851 | dipeptidyl peptidase IV inhibitor (DPP IV inhibitor) | dipeptidyl peptidase IV inhibitor | 1 | NV | [203-204]                     |

|      |                                                      |                                   |   |    |                   |
|------|------------------------------------------------------|-----------------------------------|---|----|-------------------|
| 8852 | dipeptidyl peptidase IV inhibitor (DPP IV inhibitor) | dipeptidyl peptidase IV inhibitor | 1 | NW | [217-218]         |
| 8853 | dipeptidyl peptidase IV inhibitor (DPP IV inhibitor) | dipeptidyl peptidase IV inhibitor | 1 | NY | [65-66]           |
| 8856 | dipeptidyl peptidase IV inhibitor (DPP IV inhibitor) | dipeptidyl peptidase IV inhibitor | 1 | PH | [120-121]         |
| 8862 | dipeptidyl peptidase IV inhibitor (DPP IV inhibitor) | dipeptidyl peptidase IV inhibitor | 1 | PS | [182-183]         |
| 8864 | dipeptidyl peptidase IV inhibitor (DPP IV inhibitor) | dipeptidyl peptidase IV inhibitor | 1 | PV | [111-112]         |
| 8866 | dipeptidyl peptidase IV inhibitor (DPP IV inhibitor) | dipeptidyl peptidase IV inhibitor | 1 | PY | [36-37]           |
| 8867 | dipeptidyl peptidase IV inhibitor (DPP IV inhibitor) | dipeptidyl peptidase IV inhibitor | 1 | QA | [75-76]           |
| 8868 | dipeptidyl peptidase IV inhibitor (DPP IV inhibitor) | dipeptidyl peptidase IV inhibitor | 1 | QD | [174-175]         |
| 8871 | dipeptidyl peptidase IV inhibitor (DPP IV inhibitor) | dipeptidyl peptidase IV inhibitor | 1 | QG | [150-151]         |
| 8874 | dipeptidyl peptidase IV inhibitor (DPP IV inhibitor) | dipeptidyl peptidase IV inhibitor | 2 | QL | [52-53],[72-73]   |
| 8877 | dipeptidyl peptidase IV inhibitor (DPP IV inhibitor) | dipeptidyl peptidase IV inhibitor | 1 | QS | [89-90]           |
| 8878 | dipeptidyl peptidase IV inhibitor (DPP IV inhibitor) | dipeptidyl peptidase IV inhibitor | 2 | QT | [28-29],[60-61]   |
| 8881 | dipeptidyl peptidase IV inhibitor (DPP IV inhibitor) | dipeptidyl peptidase IV inhibitor | 1 | QY | [200-201]         |
| 8882 | dipeptidyl peptidase IV inhibitor (DPP IV inhibitor) | dipeptidyl peptidase IV inhibitor | 1 | RG | [25-26]           |
| 8885 | dipeptidyl peptidase IV inhibitor (DPP IV inhibitor) | dipeptidyl peptidase IV inhibitor | 1 | RK | [9-10]            |
| 8886 | dipeptidyl peptidase IV inhibitor (DPP IV inhibitor) | dipeptidyl peptidase IV inhibitor | 1 | RL | [17-18]           |
| 8887 | dipeptidyl peptidase IV inhibitor (DPP IV inhibitor) | dipeptidyl peptidase IV inhibitor | 1 | RM | [141-142]         |
| 8892 | dipeptidyl peptidase IV inhibitor (DPP IV inhibitor) | dipeptidyl peptidase IV inhibitor | 1 | SH | [22-23]           |
| 8893 | dipeptidyl peptidase IV inhibitor (DPP IV inhibitor) | dipeptidyl peptidase IV inhibitor | 1 | SI | [103-104]         |
| 8894 | dipeptidyl peptidase IV inhibitor (DPP IV inhibitor) | dipeptidyl peptidase IV inhibitor | 1 | SK | [163-164]         |
| 8897 | dipeptidyl peptidase IV inhibitor (DPP IV inhibitor) | dipeptidyl peptidase IV inhibitor | 1 | SY | [5-6]             |
| 8899 | dipeptidyl peptidase IV inhibitor (DPP IV inhibitor) | dipeptidyl peptidase IV inhibitor | 1 | TE | [13-14]           |
| 8900 | dipeptidyl peptidase IV inhibitor (DPP IV inhibitor) | dipeptidyl peptidase IV inhibitor | 1 | TF | [29-30]           |
| 8904 | dipeptidyl peptidase IV inhibitor (DPP IV inhibitor) | dipeptidyl peptidase IV inhibitor | 1 | TK | [179-180]         |
| 8905 | dipeptidyl peptidase IV inhibitor (DPP IV inhibitor) | dipeptidyl peptidase IV inhibitor | 2 | TL | [11-12],[31-32]   |
| 8907 | dipeptidyl peptidase IV inhibitor (DPP IV inhibitor) | dipeptidyl peptidase IV inhibitor | 2 | TN | [64-65],[130-131] |
| 8909 | dipeptidyl peptidase IV inhibitor (DPP IV inhibitor) | dipeptidyl peptidase IV inhibitor | 1 | TR | [8-9]             |
| 8911 | dipeptidyl peptidase IV inhibitor (DPP IV inhibitor) | dipeptidyl peptidase IV inhibitor | 1 | TT | [170-171]         |
| 8914 | dipeptidyl peptidase IV inhibitor (DPP IV inhibitor) | dipeptidyl peptidase IV inhibitor | 1 | TY | [61-62]           |
| 8916 | dipeptidyl peptidase IV inhibitor (DPP IV inhibitor) | dipeptidyl peptidase IV inhibitor | 1 | VE | [168-169]         |
| 8920 | dipeptidyl peptidase IV inhibitor (DPP IV inhibitor) | dipeptidyl peptidase IV inhibitor | 1 | VI | [215-216]         |
| 8921 | dipeptidyl peptidase IV inhibitor (DPP IV inhibitor) | dipeptidyl peptidase IV inhibitor | 1 | VK | [86-87]           |

|      |                                                      |                                    |   |    |                     |
|------|------------------------------------------------------|------------------------------------|---|----|---------------------|
| 8926 | dipeptidyl peptidase IV inhibitor (DPP IV inhibitor) | dipeptidyl peptidase IV inhibitor  | 1 | VS | [112-113]           |
| 8927 | dipeptidyl peptidase IV inhibitor (DPP IV inhibitor) | dipeptidyl peptidase IV inhibitor  | 2 | VT | [7-8],[178-179]     |
| 8928 | dipeptidyl peptidase IV inhibitor (DPP IV inhibitor) | dipeptidyl peptidase IV inhibitor  | 2 | VW | [155-156],[192-193] |
| 8932 | dipeptidyl peptidase IV inhibitor (DPP IV inhibitor) | dipeptidyl peptidase IV inhibitor  | 1 | YA | [220-221]           |
| 8934 | dipeptidyl peptidase IV inhibitor (DPP IV inhibitor) | dipeptidyl peptidase IV inhibitor  | 1 | YE | [37-38]             |
| 8936 | dipeptidyl peptidase IV inhibitor (DPP IV inhibitor) | dipeptidyl peptidase IV inhibitor  | 1 | YG | [39-40]             |
| 8938 | dipeptidyl peptidase IV inhibitor (DPP IV inhibitor) | dipeptidyl peptidase IV inhibitor  | 1 | YI | [62-63]             |
| 8939 | dipeptidyl peptidase IV inhibitor (DPP IV inhibitor) | dipeptidyl peptidase IV inhibitor  | 1 | YK | [201-202]           |
| 8940 | dipeptidyl peptidase IV inhibitor (DPP IV inhibitor) | dipeptidyl peptidase IV inhibitor  | 2 | YL | [198-199],[208-209] |
| 8942 | dipeptidyl peptidase IV inhibitor (DPP IV inhibitor) | dipeptidyl peptidase IV inhibitor  | 1 | YN | [66-67]             |
| 8943 | dipeptidyl peptidase IV inhibitor (DPP IV inhibitor) | dipeptidyl peptidase IV inhibitor  | 1 | YQ | [225-226]           |
| 8946 | dipeptidyl peptidase IV inhibitor (DPP IV inhibitor) | dipeptidyl peptidase IV inhibitor  | 1 | YV | [6-7]               |
| 8948 | dipeptidyl peptidase IV inhibitor (DPP IV inhibitor) | dipeptidyl peptidase IV inhibitor  | 1 | YY | [197-198]           |
| 9476 | DPP-III inhibitor                                    | dipeptidyl peptidase III inhibitor | 1 | YY | [197-198]           |
| 9478 | DPP-III inhibitor                                    | dipeptidyl peptidase III inhibitor | 1 | LR | [16-17]             |
| 9482 | DPP-III inhibitor                                    | dipeptidyl peptidase III inhibitor | 2 | YL | [198-199],[208-209] |
| 9483 | DPP-III inhibitor                                    | dipeptidyl peptidase III inhibitor | 1 | YK | [201-202]           |
| 9486 | DPP-III inhibitor                                    | dipeptidyl peptidase III inhibitor | 1 | TF | [29-30]             |
| 9487 | DPP-III inhibitor                                    | dipeptidyl peptidase III inhibitor | 2 | GE | [117-118],[222-223] |
| 9492 | DPP-III inhibitor                                    | dipeptidyl peptidase III inhibitor | 1 | DA | [81-82]             |
| 9507 | DPP-III inhibitor                                    | dipeptidyl peptidase III inhibitor | 1 | SM | [134-135]           |
| 9508 | DPP-III inhibitor                                    | dipeptidyl peptidase III inhibitor | 1 | YG | [39-40]             |
| 9510 | DPP-III inhibitor                                    | dipeptidyl peptidase III inhibitor | 1 | YI | [62-63]             |
| 9511 | DPP-III inhibitor                                    | dipeptidyl peptidase III inhibitor | 1 | KA | [68-69]             |
| 8249 | CaMPDE inhibitor                                     | CaMPDE inhibitor                   | 1 | KF | [93-94]             |
| 2835 | Renin inhibitor                                      | renin inhibitor                    | 1 | FT | [30-31]             |
| 2842 | Renin inhibitor                                      | renin inhibitor                    | 1 | LR | [16-17]             |
| 8248 | Renin inhibitor                                      | renin inhibitor                    | 1 | KF | [93-94]             |
| 9433 | Renin inhibitor                                      | renin inhibitor                    | 1 | YA | [220-221]           |
| 9470 | Renin inhibitor                                      | renin inhibitor                    | 1 | LY | [224-225]           |
| 9471 | Renin inhibitor                                      | renin inhibitor                    | 1 | TF | [29-30]             |

Table S22. Profile of potential biological activity of fragments of protein Pis v 5.0101.

| ID   | Name of peptide                           | Activity      | Number | Sequence | Location                                        |
|------|-------------------------------------------|---------------|--------|----------|-------------------------------------------------|
| 3460 | Prolyl endopeptidase inhibitor            | antiamnestic  | 1      | PG       | [107-108]                                       |
| 3257 | beta-lactokinin                           | ACE inhibitor | 1      | RL       | [82-83]                                         |
| 3258 | beta-lactokinin                           | ACE inhibitor | 1      | IR       | [259-260]                                       |
| 3383 | ACE inhibitor                             | ACE inhibitor | 1      | IY       | [310-311]                                       |
| 3384 | ACE inhibitor                             | ACE inhibitor | 2      | VF       | [228-229],[378-379]                             |
| 3386 | ACE inhibitor                             | ACE inhibitor | 1      | KW       | [330-331]                                       |
| 3388 | ACE inhibitor                             | ACE inhibitor | 2      | MY       | [93-94],[179-180]                               |
| 3489 | ACE inhibitor from sake lees              | ACE inhibitor | 3      | RF       | [127-128],[137-138],[405-406]                   |
| 3492 | ACE inhibitor from sake                   | ACE inhibitor | 1      | VY       | [359-360]                                       |
| 3535 | ACE inhibitor                             | ACE inhibitor | 1      | YPR      | [180-182]                                       |
| 3537 | ACE inhibitor                             | ACE inhibitor | 2      | PR       | [181-182],[262-263]                             |
| 3551 | ACE inhibitor (from bovine beta-Lg)       | ACE inhibitor | 1      | LF       | [16-17]                                         |
| 3553 | ACE inhibitor                             | ACE inhibitor | 1      | YG       | [360-361]                                       |
| 3666 | ACE inhibitor                             | ACE inhibitor | 1      | YP       | [180-181]                                       |
| 7513 | ACE inhibitor from Alaskan pollack skin   | ACE inhibitor | 1      | PL       | [421-422]                                       |
| 7541 | ACE inhibitor from wheat germ hydrolysate | ACE inhibitor | 1      | IVY      | [358-360]                                       |
| 7547 | ACE inhibitor                             | ACE inhibitor | 1      | IRP      | [259-261]                                       |
| 7558 | ACE inhibitor from buckwheat              | ACE inhibitor | 4      | VK       | [236-237],[250-251],[252-253],[398-399]         |
| 7562 | ACE inhibitor from soy hydrolysate        | ACE inhibitor | 1      | IA       | [144-145]                                       |
| 7581 | ACE inhibitor                             | ACE inhibitor | 1      | IP       | [106-107]                                       |
| 7582 | ACE inhibitor                             | ACE inhibitor | 1      | RP       | [260-261]                                       |
| 7583 | ACE inhibitor                             | ACE inhibitor | 1      | AF       | [440-441]                                       |
| 7584 | ACE inhibitor                             | ACE inhibitor | 2      | AP       | [89-90],[115-116]                               |
| 7585 | ACE inhibitor                             | ACE inhibitor | 5      | LA       | [21-22],[186-187],[225-226],[422-423],[437-438] |
| 7586 | ACE inhibitor                             | ACE inhibitor | 1      | KR       | [399-400]                                       |
| 7587 | ACE inhibitor                             | ACE inhibitor | 2      | VP       | [348-349],[391-392]                             |
| 7588 | ACE inhibitor                             | ACE inhibitor | 3      | RA       | [400-401],[416-417],[430-431]                   |
| 7591 | ACE inhibitor                             | ACE inhibitor | 2      | GF       | [219-220],[269-270]                             |
| 7592 | ACE inhibitor                             | ACE inhibitor | 2      | FR       | [64-65],[138-139]                               |
| 7593 | ACE inhibitor                             | ACE inhibitor | 2      | IF       | [216-217],[388-389]                             |
| 7594 | ACE inhibitor                             | ACE inhibitor | 1      | VG       | [315-316]                                       |
| 7597 | ACE inhibitor                             | ACE inhibitor | 2      | GM       | [52-53],[100-101]                               |
| 7598 | ACE inhibitor                             | ACE inhibitor | 1      | GA       | [247-248]                                       |

|      |                                           |               |   |     |                                                           |
|------|-------------------------------------------|---------------|---|-----|-----------------------------------------------------------|
| 7599 | ACE inhibitor                             | ACE inhibitor | 2 | GL  | [80-81],[288-289]                                         |
| 7600 | ACE inhibitor                             | ACE inhibitor | 5 | AG  | [51-52],[67-68],[148-149],[187-188],[423-424]             |
| 7603 | ACE inhibitor                             | ACE inhibitor | 4 | GR  | [204-205],[281-282],[284-285],[316-317]                   |
| 7604 | ACE inhibitor                             | ACE inhibitor | 3 | KG  | [140-141],[253-254],[363-364]                             |
| 7605 | ACE inhibitor                             | ACE inhibitor | 1 | FG  | [374-375]                                                 |
| 7606 | ACE inhibitor                             | ACE inhibitor | 3 | DA  | [39-40],[447-448],[472-473]                               |
| 7607 | ACE inhibitor                             | ACE inhibitor | 1 | GS  | [424-425]                                                 |
| 7608 | ACE inhibitor                             | ACE inhibitor | 3 | GV  | [68-69],[149-150],[339-340]                               |
| 7610 | ACE inhibitor                             | ACE inhibitor | 6 | GQ  | [27-28],[119-120],[123-124],[386-387],[403-404],[463-464] |
| 7612 | ACE inhibitor                             | ACE inhibitor | 1 | GT  | [103-104]                                                 |
| 7614 | ACE inhibitor                             | ACE inhibitor | 2 | HG  | [18-19],[122-123]                                         |
| 7615 | ACE inhibitor                             | ACE inhibitor | 2 | GE  | [98-99],[381-382]                                         |
| 7617 | ACE inhibitor                             | ACE inhibitor | 2 | QG  | [26-27],[118-119]                                         |
| 7618 | ACE inhibitor                             | ACE inhibitor | 1 | SG  | [462-463]                                                 |
| 7620 | ACE inhibitor                             | ACE inhibitor | 2 | GD  | [141-142],[254-255]                                       |
| 7621 | ACE inhibitor                             | ACE inhibitor | 1 | TG  | [102-103]                                                 |
| 7622 | ACE inhibitor                             | ACE inhibitor | 4 | EG  | [97-98],[99-100],[157-158],[385-386]                      |
| 7623 | ACE inhibitor                             | ACE inhibitor | 1 | EA  | [50-51]                                                   |
| 7624 | ACE inhibitor                             | ACE inhibitor | 2 | NG  | [79-80],[287-288]                                         |
| 7625 | ACE inhibitor                             | ACE inhibitor | 1 | PG  | [107-108]                                                 |
| 7635 | ACE inhibitor from k-CN (fr. 51-53)       | ACE inhibitor | 1 | VAV | [69-71]                                                   |
| 7680 | ACE inhibitor from pea vicilin            | ACE inhibitor | 2 | QK  | [133-134],[210-211]                                       |
| 7681 | ACE inhibitor from soy                    | ACE inhibitor | 1 | DG  | [380-381]                                                 |
| 7683 | ACE inhibitor from garlic                 | ACE inhibitor | 3 | NF  | [352-353],[373-374],[394-395]                             |
| 7685 | ACE inhibitor from garlic                 | ACE inhibitor | 1 | SF  | [410-411]                                                 |
| 7692 | ACE inhibitor                             | ACE inhibitor | 2 | KF  | [183-184],[452-453]                                       |
| 7693 | ACE inhibitor from wakame                 | ACE inhibitor | 1 | KL  | [297-298]                                                 |
| 7741 | ACE inhibitor                             | ACE inhibitor | 3 | RR  | [205-206],[263-264],[282-283]                             |
| 7742 | ACE inhibitor                             | ACE inhibitor | 3 | AR  | [72-73],[401-402],[448-449]                               |
| 7752 | ACE inhibitor from shark meat hydrolysate | ACE inhibitor | 3 | EY  | [48-49],[85-86],[277-278]                                 |
| 7828 | ACE inhibitor                             | ACE inhibitor | 4 | EV  | [227-228],[314-315],[382-383],[435-436]                   |
| 7829 | ACE inhibitor                             | ACE inhibitor | 4 | VE  | [47-48],[54-55],[96-97],[231-232]                         |
| 7831 | ACE inhibitor                             | ACE inhibitor | 4 | LQ  | [239-240],[256-257],[332-333],[341-342]                   |
| 7832 | ACE inhibitor                             | ACE inhibitor | 2 | LN  | [321-322],[324-325]                                       |
| 7833 | ACE inhibitor                             | ACE inhibitor | 2 | PT  | [90-91],[458-459]                                         |
| 7835 | ACE inhibitor                             | ACE inhibitor | 1 | AH  | [355-356]                                                 |



|      |                                          |                  |   |      |                                                                       |
|------|------------------------------------------|------------------|---|------|-----------------------------------------------------------------------|
| 7836 | ACE inhibitor                            | ACE inhibitor    | 1 | PP   | [261-262]                                                             |
| 7837 | ACE inhibitor                            | ACE inhibitor    | 2 | PQ   | [116-117],[392-393]                                                   |
| 7838 | ACE inhibitor                            | ACE inhibitor    | 1 | EW   | [407-408]                                                             |
| 7840 | ACE inhibitor                            | ACE inhibitor    | 1 | EK   | [242-243]                                                             |
| 7841 | ACE inhibitor                            | ACE inhibitor    | 1 | KE   | [299-300]                                                             |
| 7843 | ACE inhibitor                            | ACE inhibitor    | 1 | PH   | [349-350]                                                             |
| 8182 | ACE Inhibitor                            | ACE inhibitor    | 1 | ALEP | [40-43]                                                               |
| 8184 | ACE Inhibitor                            | ACE inhibitor    | 1 | IQP  | [76-78]                                                               |
| 8193 | ACE inhibitor                            | ACE inhibitor    | 1 | AI   | [248-249]                                                             |
| 8951 | ACE inhibitor                            | ACE inhibitor    | 2 | AV   | [70-71],[396-397]                                                     |
| 9029 | ACE inhibitor                            | ACE inhibitor    | 1 | ALP  | [145-147]                                                             |
| 9031 | ACE inhibitor                            | ACE inhibitor    | 1 | LEE  | [289-291]                                                             |
| 9046 | ACE inhibitor                            | ACE inhibitor    | 1 | VQV  | [368-370]                                                             |
| 9051 | ACE inhibitor                            | ACE inhibitor    | 1 | RPP  | [260-262]                                                             |
| 9073 | ACE inhibitor                            | ACE inhibitor    | 1 | TP   | [312-313]                                                             |
| 9075 | ACE inhibitor                            | ACE inhibitor    | 1 | DM   | [178-179]                                                             |
| 9076 | ACE inhibitor                            | ACE inhibitor    | 4 | FQ   | [128-129],[194-195],[229-230],[441-442]                               |
| 9078 | ACE inhibitor                            | ACE inhibitor    | 2 | YE   | [49-50],[278-279]                                                     |
| 9079 | ACE inhibitor                            | ACE inhibitor    | 3 | IL   | [15-16],[224-225],[328-329]                                           |
| 9107 | ACE inhibitor                            | ACE inhibitor    | 1 | WL   | [331-332]                                                             |
| 9160 | ACE inhibitor                            | ACE inhibitor    | 1 | TLS  | [459-461]                                                             |
| 9173 | ACE inhibitor                            | ACE inhibitor    | 7 | RG   | [203-204],[246-247],[268-269],[280-281],[283-284],[338-339],[402-403] |
| 9184 | ACE inhibitor                            | ACE inhibitor    | 1 | ST   | [425-426]                                                             |
| 9185 | ACE inhibitor                            | ACE inhibitor    | 1 | YN   | [155-156]                                                             |
| 9192 | ACE inhibitor                            | ACE inhibitor    | 1 | AGS  | [423-425]                                                             |
| 9196 | ACE inhibitor                            | ACE inhibitor    | 1 | AVV  | [396-398]                                                             |
| 9213 | ACE inhibitor                            | ACE inhibitor    | 2 | LR   | [81-82],[429-430]                                                     |
| 9265 | ACE inhibitor                            | ACE inhibitor    | 1 | TLS  | [459-461]                                                             |
| 9566 | ACE inhibitor                            | ACE inhibitor    | 2 | QP   | [77-78],[457-458]                                                     |
| 3285 | Antithrombotic peptide                   | antithrombotic   | 1 | PG   | [107-108]                                                             |
| 2882 | Immunostimulating peptide                | immunomodulating | 1 | YG   | [360-361]                                                             |
| 3351 | Stimulating vasoactive substance release | stimulating      | 1 | EEE  | [273-275]                                                             |
| 8320 | Glucose uptake stimulating peptide       | stimulating      | 3 | VL   | [340-341],[428-429],[436-437]                                         |
| 8321 | Glucose uptake stimulating peptide       | stimulating      | 1 | LV   | [235-236]                                                             |
| 8322 | Glucose uptake stimulating peptide       | stimulating      | 3 | IV   | [95-96],[249-250],[358-359]                                           |
| 8323 | Glucose uptake stimulating peptide       | stimulating      | 3 | IL   | [15-16],[224-225],[328-329]                                           |

|      |                                                                      |                                           |   |     |                                                           |
|------|----------------------------------------------------------------------|-------------------------------------------|---|-----|-----------------------------------------------------------|
| 8324 | Glucose uptake stimulating peptide                                   | stimulating                               | 2 | LI  | [14-15],[105-106]                                         |
| 8325 | Glucose uptake stimulating peptide                                   | stimulating                               | 1 | II  | [143-144]                                                 |
| 8326 | Glucose uptake stimulating peptide                                   | stimulating                               | 3 | LL  | [6-7],[13-14],[167-168]                                   |
| 8329 | Stimulating vasoactive substance release                             | stimulating                               | 4 | EE  | [273-274],[274-275],[290-291],[434-435]                   |
| 8330 | Stimulating vasoactive substance release                             | stimulating                               | 4 | SE  | [266-267],[272-273],[276-277],[384-385]                   |
| 2890 | neuropeptide                                                         | neuropeptide                              | 6 | GQ  | [27-28],[119-120],[123-124],[386-387],[403-404],[463-464] |
| 2754 | peptide regulating the stomach mucosal membrane activity             | regulating                                | 1 | PG  | [107-108]                                                 |
| 7873 | peptide from soybean protein isolates: beta-conglycinin and glycinin | antioxidative                             | 1 | IY  | [310-311]                                                 |
| 7886 | peptide derived from egg white albumin                               | antioxidative                             | 1 | AH  | [355-356]                                                 |
| 8037 | synthetic peptide                                                    | antioxidative                             | 1 | PHW | [349-351]                                                 |
| 8067 | synthetic peptide                                                    | antioxidative                             | 1 | RHT | [73-75]                                                   |
| 8090 | peptide derived from sardine muscle                                  | antioxidative                             | 2 | MY  | [93-94],[179-180]                                         |
| 8105 | peptide derived from dried bonito                                    | antioxidative                             | 1 | VKV | [250-252]                                                 |
| 8134 | peptide derived from dried bonito                                    | antioxidative                             | 1 | KD  | [243-244]                                                 |
| 8215 | Antioxidative peptide                                                | antioxidative                             | 1 | IR  | [259-260]                                                 |
| 8217 | Antioxidative peptide                                                | antioxidative                             | 2 | LK  | [298-299],[329-330]                                       |
| 8219 | antioxidative peptide                                                | antioxidative                             | 1 | TY  | [112-113]                                                 |
| 8224 | antioxidative peptide                                                | antioxidative                             | 1 | VY  | [359-360]                                                 |
| 8459 | Antioxidant peptide from marine bivalve (Mactra veneriformis)        | antioxidative                             | 1 | TW  | [56-57]                                                   |
| 9342 | Antioxidative peptide                                                | antioxidative                             | 1 | FC  | [217-218]                                                 |
| 4005 |                                                                      | activating ubiquitin-mediated proteolysis | 3 | RA  | [400-401],[416-417],[430-431]                             |
| 4006 | Ubiquitin-mediated proteolysis activating peptide                    | activating ubiquitin-mediated proteolysis | 5 | LA  | [21-22],[186-187],[225-226],[422-423],[437-438]           |
| 9580 | Hypolipidemic peptide                                                | hypolipidemic                             | 1 | EF  | [193-194]                                                 |
| 9548 | Alpha-glucosidase inhibitor                                          | alpha-glucosidase inhibitor               | 1 | YP  | [180-181]                                                 |
| 9650 | Alpha-glucosidase inhibitor                                          | alpha-glucosidase inhibitor               | 1 | EA  | [50-51]                                                   |
| 9651 | Alpha-glucosidase inhibitor                                          | alpha-glucosidase inhibitor               | 1 | PP  | [261-262]                                                 |
| 9693 | Alpha-glucosidase inhibitor                                          | alpha-glucosidase inhibitor               | 4 | VE  | [47-48],[54-55],[96-97],[231-232]                         |
| 9694 | Alpha-glucosidase inhibitor                                          | alpha-glucosidase inhibitor               | 5 | PE  | [84-85],[110-111],[190-191],[313-314],[433-434]           |
| 3170 | dipeptidyl peptidase IV inhibitor (DPP IV inhibitor)                 | dipeptidyl peptidase IV inhibitor         | 1 | PP  | [261-262]                                                 |
| 3171 | dipeptidyl peptidase IV inhibitor (DPP IV inhibitor)                 | dipeptidyl peptidase IV inhibitor         | 1 | MP  | [432-433]                                                 |
| 3172 | dipeptidyl peptidase IV inhibitor (DPP IV inhibitor)                 | dipeptidyl peptidase IV inhibitor         | 3 | VA  | [69-70],[71-72],[150-151]                                 |
| 3173 | dipeptidyl peptidase IV inhibitor (DPP IV inhibitor)                 | dipeptidyl peptidase IV inhibitor         | 1 | MA  | [1-2]                                                     |

|      |                                                      |                                   |   |     |                                                 |
|------|------------------------------------------------------|-----------------------------------|---|-----|-------------------------------------------------|
| 3175 | dipeptidyl peptidase IV inhibitor (DPP IV inhibitor) | dipeptidyl peptidase IV inhibitor | 5 | LA  | [21-22],[186-187],[225-226],[422-423],[437-438] |
| 3176 | dipeptidyl peptidase IV inhibitor (DPP IV inhibitor) | dipeptidyl peptidase IV inhibitor | 1 | FA  | [395-396]                                       |
| 3177 | dipeptidyl peptidase IV inhibitor (DPP IV inhibitor) | dipeptidyl peptidase IV inhibitor | 2 | AP  | [89-90],[115-116]                               |
| 3179 | dipeptidyl peptidase IV inhibitor (DPP IV inhibitor) | dipeptidyl peptidase IV inhibitor | 1 | PA  | [147-148]                                       |
| 3180 | dipeptidyl peptidase IV inhibitor (DPP IV inhibitor) | dipeptidyl peptidase IV inhibitor | 3 | LP  | [83-84],[146-147],[326-327]                     |
| 3181 | dipeptidyl peptidase IV inhibitor (DPP IV inhibitor) | dipeptidyl peptidase IV inhibitor | 2 | VP  | [348-349],[391-392]                             |
| 3182 | dipeptidyl peptidase IV inhibitor (DPP IV inhibitor) | dipeptidyl peptidase IV inhibitor | 3 | LL  | [6-7],[13-14],[167-168]                         |
| 3183 | dipeptidyl peptidase IV inhibitor (DPP IV inhibitor) | dipeptidyl peptidase IV inhibitor | 4 | VV  | [162-163],[370-371],[390-391],[397-398]         |
| 8501 | Dipeptidyl peptidase IV inhibitor (DPP IV inhibitor) | dipeptidyl peptidase IV inhibitor | 1 | IP  | [106-107]                                       |
| 8503 | Dipeptidyl peptidase IV inhibitor (DPP IV inhibitor) | dipeptidyl peptidase IV inhibitor | 1 | TP  | [312-313]                                       |
| 8505 | Dipeptidyl peptidase IV inhibitor (DPP IV inhibitor) | dipeptidyl peptidase IV inhibitor | 2 | SP  | [160-161],[420-421]                             |
| 8518 | dipeptidyl peptidase IV inhibitor (DPP IV inhibitor) | dipeptidyl peptidase IV inhibitor | 1 | RP  | [260-261]                                       |
| 8521 | dipeptidyl peptidase IV inhibitor (DPP IV inhibitor) | dipeptidyl peptidase IV inhibitor | 1 | YP  | [180-181]                                       |
| 8524 | dipeptidyl peptidase IV inhibitor (DPP IV inhibitor) | dipeptidyl peptidase IV inhibitor | 1 | GA  | [247-248]                                       |
| 8525 | dipeptidyl peptidase IV inhibitor (DPP IV inhibitor) | dipeptidyl peptidase IV inhibitor | 1 | IA  | [144-145]                                       |
| 8526 | dipeptidyl peptidase IV inhibitor (DPP IV inhibitor) | dipeptidyl peptidase IV inhibitor | 3 | RA  | [400-401],[416-417],[430-431]                   |
| 8529 | dipeptidyl peptidase IV inhibitor (DPP IV inhibitor) | dipeptidyl peptidase IV inhibitor | 1 | EP  | [42-43]                                         |
| 8530 | dipeptidyl peptidase IV inhibitor (DPP IV inhibitor) | dipeptidyl peptidase IV inhibitor | 2 | NP  | [3-4],[189-190]                                 |
| 8532 | dipeptidyl peptidase IV inhibitor (DPP IV inhibitor) | dipeptidyl peptidase IV inhibitor | 2 | QP  | [77-78],[457-458]                               |
| 8558 | dipeptidyl peptidase IV inhibitor (DPP IV inhibitor) | dipeptidyl peptidase IV inhibitor | 1 | EK  | [242-243]                                       |
| 8559 | dipeptidyl peptidase IV inhibitor (DPP IV inhibitor) | dipeptidyl peptidase IV inhibitor | 3 | AL  | [40-41],[145-146],[345-346]                     |
| 8560 | dipeptidyl peptidase IV inhibitor (DPP IV inhibitor) | dipeptidyl peptidase IV inhibitor | 5 | SL  | [5-6],[8-9],[234-235],[320-321],[323-324]       |
| 8561 | dipeptidyl peptidase IV inhibitor (DPP IV inhibitor) | dipeptidyl peptidase IV inhibitor | 2 | GL  | [80-81],[288-289]                               |
| 8638 | dipeptidyl peptidase IV inhibitor (DPP IV inhibitor) | dipeptidyl peptidase IV inhibitor | 1 | PL  | [421-422]                                       |
| 8677 | dipeptidyl peptidase IV inhibitor (DPP IV inhibitor) | dipeptidyl peptidase IV inhibitor | 1 | WL  | [331-332]                                       |
| 8679 | dipeptidyl peptidase IV inhibitor (DPP IV inhibitor) | dipeptidyl peptidase IV inhibitor | 1 | WI  | [408-409]                                       |
| 8680 | dipeptidyl peptidase IV inhibitor (DPP IV inhibitor) | dipeptidyl peptidase IV inhibitor | 1 | WN  | [351-352]                                       |
| 8684 | dipeptidyl peptidase IV inhibitor (DPP IV inhibitor) | dipeptidyl peptidase IV inhibitor | 1 | WC  | [153-154]                                       |
| 8693 | dipeptidyl peptidase IV inhibitor (DPP IV inhibitor) | dipeptidyl peptidase IV inhibitor | 1 | IQP | [76-78]                                         |
| 8696 | dipeptidyl peptidase IV inhibitor (DPP IV inhibitor) | dipeptidyl peptidase IV inhibitor | 1 | YT  | [311-312]                                       |
| 8758 | dipeptidyl peptidase IV inhibitor (DPP IV inhibitor) | dipeptidyl peptidase IV inhibitor | 2 | AE  | [226-227],[336-337]                             |
| 8759 | dipeptidyl peptidase IV inhibitor (DPP IV inhibitor) | dipeptidyl peptidase IV inhibitor | 1 | AF  | [440-441]                                       |
| 8760 | dipeptidyl peptidase IV inhibitor (DPP IV inhibitor) | dipeptidyl peptidase IV inhibitor | 5 | AG  | [51-52],[67-68],[148-149],[187-188],[423-424]   |
| 8761 | dipeptidyl peptidase IV inhibitor (DPP IV inhibitor) | dipeptidyl peptidase IV inhibitor | 1 | AH  | [355-356]                                       |
| 8762 | dipeptidyl peptidase IV inhibitor (DPP IV inhibitor) | dipeptidyl peptidase IV inhibitor | 1 | AS  | [22-23]                                         |
| 8764 | dipeptidyl peptidase IV inhibitor (DPP IV inhibitor) | dipeptidyl peptidase IV inhibitor | 2 | AV  | [70-71],[396-397]                               |

|      |                                                      |                                   |   |    |                                         |
|------|------------------------------------------------------|-----------------------------------|---|----|-----------------------------------------|
| 8766 | dipeptidyl peptidase IV inhibitor (DPP IV inhibitor) | dipeptidyl peptidase IV inhibitor | 4 | DN | [44-45],[244-245],[286-287],[372-373]   |
| 8767 | dipeptidyl peptidase IV inhibitor (DPP IV inhibitor) | dipeptidyl peptidase IV inhibitor | 2 | DP | [58-59],[304-305]                       |
| 8768 | dipeptidyl peptidase IV inhibitor (DPP IV inhibitor) | dipeptidyl peptidase IV inhibitor | 1 | DQ | [36-37]                                 |
| 8769 | dipeptidyl peptidase IV inhibitor (DPP IV inhibitor) | dipeptidyl peptidase IV inhibitor | 1 | DR | [415-416]                               |
| 8770 | dipeptidyl peptidase IV inhibitor (DPP IV inhibitor) | dipeptidyl peptidase IV inhibitor | 4 | EG | [97-98],[99-100],[157-158],[385-386]    |
| 8773 | dipeptidyl peptidase IV inhibitor (DPP IV inhibitor) | dipeptidyl peptidase IV inhibitor | 2 | ES | [271-272],[275-276]                     |
| 8774 | dipeptidyl peptidase IV inhibitor (DPP IV inhibitor) | dipeptidyl peptidase IV inhibitor | 3 | ET | [55-56],[111-112],[291-292]             |
| 8775 | dipeptidyl peptidase IV inhibitor (DPP IV inhibitor) | dipeptidyl peptidase IV inhibitor | 4 | EV | [227-228],[314-315],[382-383],[435-436] |
| 8776 | dipeptidyl peptidase IV inhibitor (DPP IV inhibitor) | dipeptidyl peptidase IV inhibitor | 1 | EW | [407-408]                               |
| 8777 | dipeptidyl peptidase IV inhibitor (DPP IV inhibitor) | dipeptidyl peptidase IV inhibitor | 3 | EY | [48-49],[85-86],[277-278]               |
| 8778 | dipeptidyl peptidase IV inhibitor (DPP IV inhibitor) | dipeptidyl peptidase IV inhibitor | 3 | FN | [184-185],[353-354],[453-454]           |
| 8779 | dipeptidyl peptidase IV inhibitor (DPP IV inhibitor) | dipeptidyl peptidase IV inhibitor | 4 | FQ | [128-129],[194-195],[229-230],[441-442] |
| 8780 | dipeptidyl peptidase IV inhibitor (DPP IV inhibitor) | dipeptidyl peptidase IV inhibitor | 2 | FR | [64-65],[138-139]                       |
| 8781 | dipeptidyl peptidase IV inhibitor (DPP IV inhibitor) | dipeptidyl peptidase IV inhibitor | 2 | GE | [98-99],[381-382]                       |
| 8782 | dipeptidyl peptidase IV inhibitor (DPP IV inhibitor) | dipeptidyl peptidase IV inhibitor | 2 | GF | [219-220],[269-270]                     |
| 8786 | dipeptidyl peptidase IV inhibitor (DPP IV inhibitor) | dipeptidyl peptidase IV inhibitor | 3 | GV | [68-69],[149-150],[339-340]             |
| 8789 | dipeptidyl peptidase IV inhibitor (DPP IV inhibitor) | dipeptidyl peptidase IV inhibitor | 1 | HD | [303-304]                               |
| 8790 | dipeptidyl peptidase IV inhibitor (DPP IV inhibitor) | dipeptidyl peptidase IV inhibitor | 1 | HE | [61-62]                                 |
| 8795 | dipeptidyl peptidase IV inhibitor (DPP IV inhibitor) | dipeptidyl peptidase IV inhibitor | 1 | HS | [356-357]                               |
| 8796 | dipeptidyl peptidase IV inhibitor (DPP IV inhibitor) | dipeptidyl peptidase IV inhibitor | 1 | HT | [74-75]                                 |
| 8798 | dipeptidyl peptidase IV inhibitor (DPP IV inhibitor) | dipeptidyl peptidase IV inhibitor | 1 | HW | [350-351]                               |
| 8800 | dipeptidyl peptidase IV inhibitor (DPP IV inhibitor) | dipeptidyl peptidase IV inhibitor | 1 | IH | [302-303]                               |
| 8801 | dipeptidyl peptidase IV inhibitor (DPP IV inhibitor) | dipeptidyl peptidase IV inhibitor | 1 | II | [143-144]                               |
| 8802 | dipeptidyl peptidase IV inhibitor (DPP IV inhibitor) | dipeptidyl peptidase IV inhibitor | 3 | IL | [15-16],[224-225],[328-329]             |
| 8805 | dipeptidyl peptidase IV inhibitor (DPP IV inhibitor) | dipeptidyl peptidase IV inhibitor | 2 | IQ | [76-77],[135-136]                       |
| 8806 | dipeptidyl peptidase IV inhibitor (DPP IV inhibitor) | dipeptidyl peptidase IV inhibitor | 1 | IR | [259-260]                               |
| 8808 | dipeptidyl peptidase IV inhibitor (DPP IV inhibitor) | dipeptidyl peptidase IV inhibitor | 1 | KE | [299-300]                               |
| 8809 | dipeptidyl peptidase IV inhibitor (DPP IV inhibitor) | dipeptidyl peptidase IV inhibitor | 2 | KF | [183-184],[452-453]                     |
| 8810 | dipeptidyl peptidase IV inhibitor (DPP IV inhibitor) | dipeptidyl peptidase IV inhibitor | 3 | KG | [140-141],[253-254],[363-364]           |
| 8811 | dipeptidyl peptidase IV inhibitor (DPP IV inhibitor) | dipeptidyl peptidase IV inhibitor | 1 | KH | [131-132]                               |
| 8812 | dipeptidyl peptidase IV inhibitor (DPP IV inhibitor) | dipeptidyl peptidase IV inhibitor | 3 | KI | [134-135],[223-224],[450-451]           |
| 8814 | dipeptidyl peptidase IV inhibitor (DPP IV inhibitor) | dipeptidyl peptidase IV inhibitor | 1 | KR | [399-400]                               |
| 8815 | dipeptidyl peptidase IV inhibitor (DPP IV inhibitor) | dipeptidyl peptidase IV inhibitor | 1 | KS | [211-212]                               |
| 8816 | dipeptidyl peptidase IV inhibitor (DPP IV inhibitor) | dipeptidyl peptidase IV inhibitor | 1 | KT | [412-413]                               |
| 8817 | dipeptidyl peptidase IV inhibitor (DPP IV inhibitor) | dipeptidyl peptidase IV inhibitor | 1 | KV | [251-252]                               |
| 8818 | dipeptidyl peptidase IV inhibitor (DPP IV inhibitor) | dipeptidyl peptidase IV inhibitor | 1 | KW | [330-331]                               |

|      |                                                      |                                   |   |    |                                                 |
|------|------------------------------------------------------|-----------------------------------|---|----|-------------------------------------------------|
| 8821 | dipeptidyl peptidase IV inhibitor (DPP IV inhibitor) | dipeptidyl peptidase IV inhibitor | 2 | LI | [14-15],[105-106]                               |
| 8822 | dipeptidyl peptidase IV inhibitor (DPP IV inhibitor) | dipeptidyl peptidase IV inhibitor | 2 | LM | [92-93],[346-347]                               |
| 8823 | dipeptidyl peptidase IV inhibitor (DPP IV inhibitor) | dipeptidyl peptidase IV inhibitor | 2 | LN | [321-322],[324-325]                             |
| 8825 | dipeptidyl peptidase IV inhibitor (DPP IV inhibitor) | dipeptidyl peptidase IV inhibitor | 1 | LV | [235-236]                                       |
| 8830 | dipeptidyl peptidase IV inhibitor (DPP IV inhibitor) | dipeptidyl peptidase IV inhibitor | 1 | MI | [418-419]                                       |
| 8831 | dipeptidyl peptidase IV inhibitor (DPP IV inhibitor) | dipeptidyl peptidase IV inhibitor | 1 | MK | [296-297]                                       |
| 8836 | dipeptidyl peptidase IV inhibitor (DPP IV inhibitor) | dipeptidyl peptidase IV inhibitor | 1 | MR | [469-470]                                       |
| 8837 | dipeptidyl peptidase IV inhibitor (DPP IV inhibitor) | dipeptidyl peptidase IV inhibitor | 2 | MV | [53-54],[347-348]                               |
| 8838 | dipeptidyl peptidase IV inhibitor (DPP IV inhibitor) | dipeptidyl peptidase IV inhibitor | 2 | MY | [93-94],[179-180]                               |
| 8839 | dipeptidyl peptidase IV inhibitor (DPP IV inhibitor) | dipeptidyl peptidase IV inhibitor | 5 | NA | [88-89],[344-345],[354-355],[365-366],[439-440] |
| 8840 | dipeptidyl peptidase IV inhibitor (DPP IV inhibitor) | dipeptidyl peptidase IV inhibitor | 1 | ND | [414-415]                                       |
| 8841 | dipeptidyl peptidase IV inhibitor (DPP IV inhibitor) | dipeptidyl peptidase IV inhibitor | 4 | NE | [31-32],[156-157],[241-242],[455-456]           |
| 8842 | dipeptidyl peptidase IV inhibitor (DPP IV inhibitor) | dipeptidyl peptidase IV inhibitor | 3 | NF | [352-353],[373-374],[394-395]                   |
| 8843 | dipeptidyl peptidase IV inhibitor (DPP IV inhibitor) | dipeptidyl peptidase IV inhibitor | 2 | NG | [79-80],[287-288]                               |
| 8844 | dipeptidyl peptidase IV inhibitor (DPP IV inhibitor) | dipeptidyl peptidase IV inhibitor | 1 | NH | [60-61]                                         |
| 8845 | dipeptidyl peptidase IV inhibitor (DPP IV inhibitor) | dipeptidyl peptidase IV inhibitor | 2 | NL | [185-186],[325-326]                             |
| 8847 | dipeptidyl peptidase IV inhibitor (DPP IV inhibitor) | dipeptidyl peptidase IV inhibitor | 3 | NN | [214-215],[343-344],[454-455]                   |
| 8848 | dipeptidyl peptidase IV inhibitor (DPP IV inhibitor) | dipeptidyl peptidase IV inhibitor | 1 | NQ | [175-176]                                       |
| 8849 | dipeptidyl peptidase IV inhibitor (DPP IV inhibitor) | dipeptidyl peptidase IV inhibitor | 2 | NR | [45-46],[245-246]                               |
| 8850 | dipeptidyl peptidase IV inhibitor (DPP IV inhibitor) | dipeptidyl peptidase IV inhibitor | 1 | NT | [376-377]                                       |
| 8852 | dipeptidyl peptidase IV inhibitor (DPP IV inhibitor) | dipeptidyl peptidase IV inhibitor | 1 | NW | [152-153]                                       |
| 8855 | dipeptidyl peptidase IV inhibitor (DPP IV inhibitor) | dipeptidyl peptidase IV inhibitor | 1 | PG | [107-108]                                       |
| 8856 | dipeptidyl peptidase IV inhibitor (DPP IV inhibitor) | dipeptidyl peptidase IV inhibitor | 1 | PH | [349-350]                                       |
| 8857 | dipeptidyl peptidase IV inhibitor (DPP IV inhibitor) | dipeptidyl peptidase IV inhibitor | 1 | PI | [327-328]                                       |
| 8860 | dipeptidyl peptidase IV inhibitor (DPP IV inhibitor) | dipeptidyl peptidase IV inhibitor | 2 | PN | [59-60],[78-79]                                 |
| 8861 | dipeptidyl peptidase IV inhibitor (DPP IV inhibitor) | dipeptidyl peptidase IV inhibitor | 2 | PQ | [116-117],[392-393]                             |
| 8862 | dipeptidyl peptidase IV inhibitor (DPP IV inhibitor) | dipeptidyl peptidase IV inhibitor | 2 | PS | [4-5],[305-306]                                 |
| 8863 | dipeptidyl peptidase IV inhibitor (DPP IV inhibitor) | dipeptidyl peptidase IV inhibitor | 2 | PT | [90-91],[458-459]                               |
| 8864 | dipeptidyl peptidase IV inhibitor (DPP IV inhibitor) | dipeptidyl peptidase IV inhibitor | 1 | PV | [161-162]                                       |
| 8867 | dipeptidyl peptidase IV inhibitor (DPP IV inhibitor) | dipeptidyl peptidase IV inhibitor | 1 | QA | [114-115]                                       |
| 8868 | dipeptidyl peptidase IV inhibitor (DPP IV inhibitor) | dipeptidyl peptidase IV inhibitor | 1 | QD | [129-130]                                       |
| 8870 | dipeptidyl peptidase IV inhibitor (DPP IV inhibitor) | dipeptidyl peptidase IV inhibitor | 1 | QF | [63-64]                                         |
| 8871 | dipeptidyl peptidase IV inhibitor (DPP IV inhibitor) | dipeptidyl peptidase IV inhibitor | 2 | QG | [26-27],[118-119]                               |
| 8872 | dipeptidyl peptidase IV inhibitor (DPP IV inhibitor) | dipeptidyl peptidase IV inhibitor | 1 | QH | [121-122]                                       |
| 8873 | dipeptidyl peptidase IV inhibitor (DPP IV inhibitor) | dipeptidyl peptidase IV inhibitor | 3 | QI | [34-35],[387-388],[442-443]                     |
| 8874 | dipeptidyl peptidase IV inhibitor (DPP IV inhibitor) | dipeptidyl peptidase IV inhibitor | 4 | QL | [37-38],[176-177],[238-239],[333-334]           |

|      |                                                      |                                   |    |    |                                                                                                                             |
|------|------------------------------------------------------|-----------------------------------|----|----|-----------------------------------------------------------------------------------------------------------------------------|
| 8875 | dipeptidyl peptidase IV inhibitor (DPP IV inhibitor) | dipeptidyl peptidase IV inhibitor | 5  | QN | [30-31],[174-175],[240-241],[342-343],[393-394]                                                                             |
| 8876 | dipeptidyl peptidase IV inhibitor (DPP IV inhibitor) | dipeptidyl peptidase IV inhibitor | 13 | QQ | [25-26],[28-29],[29-30],[117-118],[120-121],[195-196],[196-197],[197-198],[198-199],[199-200],[200-201],[209-210],[467-468] |
| 8877 | dipeptidyl peptidase IV inhibitor (DPP IV inhibitor) | dipeptidyl peptidase IV inhibitor | 6  | QS | [124-125],[201-202],[207-208],[233-234],[265-266],[464-465]                                                                 |
| 8879 | dipeptidyl peptidase IV inhibitor (DPP IV inhibitor) | dipeptidyl peptidase IV inhibitor | 4  | QV | [230-231],[257-258],[367-368],[369-370]                                                                                     |
| 8882 | dipeptidyl peptidase IV inhibitor (DPP IV inhibitor) | dipeptidyl peptidase IV inhibitor | 7  | RG | [203-204],[246-247],[268-269],[280-281],[283-284],[338-339],[402-403]                                                       |
| 8883 | dipeptidyl peptidase IV inhibitor (DPP IV inhibitor) | dipeptidyl peptidase IV inhibitor | 1  | RH | [73-74]                                                                                                                     |
| 8884 | dipeptidyl peptidase IV inhibitor (DPP IV inhibitor) | dipeptidyl peptidase IV inhibitor | 1  | RI | [317-318]                                                                                                                   |
| 8885 | dipeptidyl peptidase IV inhibitor (DPP IV inhibitor) | dipeptidyl peptidase IV inhibitor | 3  | RK | [139-140],[182-183],[449-450]                                                                                               |
| 8886 | dipeptidyl peptidase IV inhibitor (DPP IV inhibitor) | dipeptidyl peptidase IV inhibitor | 1  | RL | [82-83]                                                                                                                     |
| 8889 | dipeptidyl peptidase IV inhibitor (DPP IV inhibitor) | dipeptidyl peptidase IV inhibitor | 3  | RR | [205-206],[263-264],[282-283]                                                                                               |
| 8891 | dipeptidyl peptidase IV inhibitor (DPP IV inhibitor) | dipeptidyl peptidase IV inhibitor | 1  | SF | [410-411]                                                                                                                   |
| 8893 | dipeptidyl peptidase IV inhibitor (DPP IV inhibitor) | dipeptidyl peptidase IV inhibitor | 1  | SI | [357-358]                                                                                                                   |
| 8895 | dipeptidyl peptidase IV inhibitor (DPP IV inhibitor) | dipeptidyl peptidase IV inhibitor | 2  | SV | [10-11],[427-428]                                                                                                           |
| 8901 | dipeptidyl peptidase IV inhibitor (DPP IV inhibitor) | dipeptidyl peptidase IV inhibitor | 1  | TG | [102-103]                                                                                                                   |
| 8903 | dipeptidyl peptidase IV inhibitor (DPP IV inhibitor) | dipeptidyl peptidase IV inhibitor | 2  | TI | [75-76],[292-293]                                                                                                           |
| 8904 | dipeptidyl peptidase IV inhibitor (DPP IV inhibitor) | dipeptidyl peptidase IV inhibitor | 1  | TK | [222-223]                                                                                                                   |
| 8905 | dipeptidyl peptidase IV inhibitor (DPP IV inhibitor) | dipeptidyl peptidase IV inhibitor | 4  | TL | [91-92],[104-105],[166-167],[459-460]                                                                                       |
| 8906 | dipeptidyl peptidase IV inhibitor (DPP IV inhibitor) | dipeptidyl peptidase IV inhibitor | 1  | TM | [295-296]                                                                                                                   |
| 8907 | dipeptidyl peptidase IV inhibitor (DPP IV inhibitor) | dipeptidyl peptidase IV inhibitor | 1  | TN | [413-414]                                                                                                                   |
| 8910 | dipeptidyl peptidase IV inhibitor (DPP IV inhibitor) | dipeptidyl peptidase IV inhibitor | 2  | TS | [319-320],[426-427]                                                                                                         |
| 8912 | dipeptidyl peptidase IV inhibitor (DPP IV inhibitor) | dipeptidyl peptidase IV inhibitor | 2  | TV | [164-165],[377-378]                                                                                                         |
| 8913 | dipeptidyl peptidase IV inhibitor (DPP IV inhibitor) | dipeptidyl peptidase IV inhibitor | 1  | TW | [56-57]                                                                                                                     |
| 8914 | dipeptidyl peptidase IV inhibitor (DPP IV inhibitor) | dipeptidyl peptidase IV inhibitor | 1  | TY | [112-113]                                                                                                                   |
| 8915 | dipeptidyl peptidase IV inhibitor (DPP IV inhibitor) | dipeptidyl peptidase IV inhibitor | 1  | VD | [371-372]                                                                                                                   |
| 8916 | dipeptidyl peptidase IV inhibitor (DPP IV inhibitor) | dipeptidyl peptidase IV inhibitor | 4  | VE | [47-48],[54-55],[96-97],[231-232]                                                                                           |
| 8917 | dipeptidyl peptidase IV inhibitor (DPP IV inhibitor) | dipeptidyl peptidase IV inhibitor | 2  | VF | [228-229],[378-379]                                                                                                         |
| 8918 | dipeptidyl peptidase IV inhibitor (DPP IV inhibitor) | dipeptidyl peptidase IV inhibitor | 1  | VG | [315-316]                                                                                                                   |
| 8920 | dipeptidyl peptidase IV inhibitor (DPP IV inhibitor) | dipeptidyl peptidase IV inhibitor | 1  | VI | [258-259]                                                                                                                   |
| 8921 | dipeptidyl peptidase IV inhibitor (DPP IV inhibitor) | dipeptidyl peptidase IV inhibitor | 4  | VK | [236-237],[250-251],[252-253],[398-399]                                                                                     |
| 8922 | dipeptidyl peptidase IV inhibitor (DPP IV inhibitor) | dipeptidyl peptidase IV inhibitor | 3  | VL | [340-341],[428-429],[436-437]                                                                                               |
| 8925 | dipeptidyl peptidase IV inhibitor (DPP IV inhibitor) | dipeptidyl peptidase IV inhibitor | 1  | VQ | [368-369]                                                                                                                   |
| 8926 | dipeptidyl peptidase IV inhibitor (DPP IV inhibitor) | dipeptidyl peptidase IV inhibitor | 2  | VS | [170-171],[383-384]                                                                                                         |
| 8927 | dipeptidyl peptidase IV inhibitor (DPP IV inhibitor) | dipeptidyl peptidase IV inhibitor | 2  | VT | [163-164],[165-166]                                                                                                         |
| 8929 | dipeptidyl peptidase IV inhibitor (DPP IV inhibitor) | dipeptidyl peptidase IV inhibitor | 1  | VY | [359-360]                                                                                                                   |
| 8930 | dipeptidyl peptidase IV inhibitor (DPP IV inhibitor) | dipeptidyl peptidase IV inhibitor | 1  | WD | [57-58]                                                                                                                     |

|      |                                                      |                                    |   |    |                                                 |
|------|------------------------------------------------------|------------------------------------|---|----|-------------------------------------------------|
| 8934 | dipeptidyl peptidase IV inhibitor (DPP IV inhibitor) | dipeptidyl peptidase IV inhibitor  | 2 | YE | [49-50],[278-279]                               |
| 8936 | dipeptidyl peptidase IV inhibitor (DPP IV inhibitor) | dipeptidyl peptidase IV inhibitor  | 1 | YG | [360-361]                                       |
| 8938 | dipeptidyl peptidase IV inhibitor (DPP IV inhibitor) | dipeptidyl peptidase IV inhibitor  | 1 | YI | [94-95]                                         |
| 8942 | dipeptidyl peptidase IV inhibitor (DPP IV inhibitor) | dipeptidyl peptidase IV inhibitor  | 1 | YN | [155-156]                                       |
| 8943 | dipeptidyl peptidase IV inhibitor (DPP IV inhibitor) | dipeptidyl peptidase IV inhibitor  | 1 | YQ | [113-114]                                       |
| 8945 | dipeptidyl peptidase IV inhibitor (DPP IV inhibitor) | dipeptidyl peptidase IV inhibitor  | 1 | YS | [86-87]                                         |
| 9478 | DPP-III inhibitor                                    | dipeptidyl peptidase III inhibitor | 2 | LR | [81-82],[429-430]                               |
| 9479 | DPP-III inhibitor                                    | dipeptidyl peptidase III inhibitor | 1 | MR | [469-470]                                       |
| 9485 | DPP-III inhibitor                                    | dipeptidyl peptidase III inhibitor | 3 | RR | [205-206],[263-264],[282-283]                   |
| 9487 | DPP-III inhibitor                                    | dipeptidyl peptidase III inhibitor | 2 | GE | [98-99],[381-382]                               |
| 9488 | DPP-III inhibitor                                    | dipeptidyl peptidase III inhibitor | 2 | GF | [219-220],[269-270]                             |
| 9489 | DPP-III inhibitor                                    | dipeptidyl peptidase III inhibitor | 2 | PR | [181-182],[262-263]                             |
| 9490 | DPP-III inhibitor                                    | dipeptidyl peptidase III inhibitor | 3 | RF | [127-128],[137-138],[405-406]                   |
| 9491 | DPP-III inhibitor                                    | dipeptidyl peptidase III inhibitor | 1 | RV | [46-47]                                         |
| 9492 | DPP-III inhibitor                                    | dipeptidyl peptidase III inhibitor | 3 | DA | [39-40],[447-448],[472-473]                     |
| 9497 | DPP-III inhibitor                                    | dipeptidyl peptidase III inhibitor | 1 | IH | [302-303]                                       |
| 9499 | DPP-III inhibitor                                    | dipeptidyl peptidase III inhibitor | 5 | LA | [21-22],[186-187],[225-226],[422-423],[437-438] |
| 9500 | DPP-III inhibitor                                    | dipeptidyl peptidase III inhibitor | 1 | FA | [395-396]                                       |
| 9501 | DPP-III inhibitor                                    | dipeptidyl peptidase III inhibitor | 2 | FR | [64-65],[138-139]                               |
| 9504 | DPP-III inhibitor                                    | dipeptidyl peptidase III inhibitor | 5 | PE | [84-85],[110-111],[190-191],[313-314],[433-434] |
| 9508 | DPP-III inhibitor                                    | dipeptidyl peptidase III inhibitor | 1 | YG | [360-361]                                       |
| 9509 | DPP-III inhibitor                                    | dipeptidyl peptidase III inhibitor | 1 | VY | [359-360]                                       |
| 9510 | DPP-III inhibitor                                    | dipeptidyl peptidase III inhibitor | 1 | YI | [94-95]                                         |
| 8247 | CaMPDE inhibitor                                     | CaMPDE inhibitor                   | 1 | IR | [259-260]                                       |
| 8249 | CaMPDE inhibitor                                     | CaMPDE inhibitor                   | 2 | KF | [183-184],[452-453]                             |
| 8250 | CaMPDE inhibitor                                     | CaMPDE inhibitor                   | 1 | EF | [193-194]                                       |
| 2842 | Renin inhibitor                                      | renin inhibitor                    | 2 | LR | [81-82],[429-430]                               |
| 8246 | renin inhibitor                                      | renin inhibitor                    | 1 | IR | [259-260]                                       |
| 8248 | Renin inhibitor                                      | renin inhibitor                    | 2 | KF | [183-184],[452-453]                             |
| 8251 | Renin inhibitor                                      | renin inhibitor                    | 1 | EF | [193-194]                                       |
| 9430 | Renin inhibitor                                      | renin inhibitor                    | 2 | NR | [45-46],[245-246]                               |
| 9431 | Renin inhibitor                                      | renin inhibitor                    | 1 | QF | [63-64]                                         |
| 9432 | Renin inhibitor                                      | renin inhibitor                    | 1 | SF | [410-411]                                       |

**Table S23.** Predicted products of proteolysis of the proteins from tree nuts by pepsin, trypsin and chymotrypsin.

| No | Allergen     | Products of proteolysis                                                                                                                                                                                                                                                                                                                                                                                                                                                                                                                                                                                                                                                                                                                                                                                                                                                                                                                                                                                                                                                                                                                                                                                                                                                                                                                                                                                                                                                                                                                                                                                                                                                                                                                                                                                                                                                                 |
|----|--------------|-----------------------------------------------------------------------------------------------------------------------------------------------------------------------------------------------------------------------------------------------------------------------------------------------------------------------------------------------------------------------------------------------------------------------------------------------------------------------------------------------------------------------------------------------------------------------------------------------------------------------------------------------------------------------------------------------------------------------------------------------------------------------------------------------------------------------------------------------------------------------------------------------------------------------------------------------------------------------------------------------------------------------------------------------------------------------------------------------------------------------------------------------------------------------------------------------------------------------------------------------------------------------------------------------------------------------------------------------------------------------------------------------------------------------------------------------------------------------------------------------------------------------------------------------------------------------------------------------------------------------------------------------------------------------------------------------------------------------------------------------------------------------------------------------------------------------------------------------------------------------------------------|
| 1  | Ana o 1.0101 | M - G - PPT - K - F - SF - SL - F - L - VS - VL - VL - CL - G - F - A - L - A - K - ID - PE - L - K - Q - CK - H - Q - CK - VQ - R - Q - Y - D - E - Q - Q - K - E - Q - C - VK - E - CE - K - Y - Y - K - E - K - K - G - R - E - R - E - H - E - E - E - E - E - W - G - T - G - G - VD - E - PST - H - E - PA - E - K - H - L - SQ - CM - R - Q - CE - R - Q - E - G - G - Q - Q - K - Q - L - CR - F - R - CQ - E - R - Y - K - K - E - R - G - Q - H - N - Y - K - R - E - D - D - E - D - E - D - E - D - E - A - E - E - E - D - E - N - PY - VF - E - D - E - D - F - T - T - K - VK - T - E - Q - G - K - V - VL - L - PK - F - T - Q - K - SK - L - L - H - A - L - E - K - Y - R - L - A - VL - VA - N - PQ - A - F - V - VPSH - M - D - A - D - S - IF - F - VSW - G - R - G - T - IT - K - IL - E - N - K - R - E - S - IN - VR - Q - G - D - I - VS - ISSG - T - PF - Y - IA - N - N - D - E - N - E - K - L - Y - L - VQ - F - L - R - P - VN - L - PG - H - F - E - VF - H - G - PG - G - E - N - PE - SF - Y - R - A - F - SW - E - IL - E - A - A - L - K - T - SK - D - T - L - E - K - L - F - E - K - Q - D - Q - G - T - IM - K - A - SK - E - Q - IR - A - M - SR - R - G - E - G - PK - IW - PF - T - E - E - ST - G - SF - K - L - F - K - K - D - PSQ - SN - K - Y - G - Q - L - F - E - A - E - R - ID - Y - PPL - E - K - L - D - M - V - VSY - A - N - IT - K - G - G - M - S - VPF - Y - N - SR - A - T - K - IA - I - V - VSG - E - G - C - VE - IA - CPH - L - SSSK - SSH - PSY - K - K - L - R - A - R - IR - K - D - T - VF - I - VPA - G - H - PF - A - T - VA - SG - N - E - N - L - E - I - VCF - E - VN - A - E - G - N - IR - Y - T - L - A - G - K - K - N - I - IK - VM - E - K - E - A - K - E - L - A - F - K - M - E - G - E - E - VD - K - VF - G - K - Q - D - E - E - F - F - F - Q - G - PE - W - R - K - E - K - E - G - R - A - D - E |
| 2  | Ana o 1.0102 | PPT - K - F - SF - SL - F - L - VS - VL - VL - CL - G - F - A - L - A - K - ID - PE - L - K - Q - CK - H - Q - CK - VQ - R - Q - Y - D - E - Q - Q - K - E - Q - C - VK - E - CE - K - Y - Y - K - E - K - K - G - R - E - R - E - H - E - E - E - E - E - W - G - T - G - G - VD - E - PST - H - E - PA - E - K - H - L - SQ - CM - R - Q - CE - R - Q - E - G - G - Q - Q - K - Q - L - CR - F - R - CQ - E - R - Y - K - K - E - R - G - Q - H - N - Y - K - R - E - D - D - E - D - E - D - E - D - E - A - E - E - E - D - E - N - PY - VF - E - D - E - D - F - T - T - K - VK - T - E - Q - G - K - V - VL - L - PK - F - T - Q - K - SK - L - L - H - A - L - E - K - Y - R - L - A - VL - VA - N - PQ - A - F - V - VPSH - M - D - A - D - S - IF - F - VSW - G - R - G - T - IT - K - IL - E - N - K - R - E - S - IN - VR - Q - G - D - I - VS - ISSG - T - PF - Y - IA - N - N - D - E - N - E - K - L - Y - L - VQ - F - L - R - P - VN - L - PG - H - F - E - VF - H - G - PG - G - E - N - PE - SF - Y - R - A - F - SW - E - IL - E - A - A - L - K - T - SK - D - T - L - E - K - L - F - E - K - Q - D - Q - G - T - IM - K - A - SK - E - Q - VR - A - M - SR - R - G - E - G - PK - IW - PF - T - E - E - ST - G - SF - K - L - F - K - K - D - PSQ - SN - K - Y - G - Q - L - F - E - A - E - R - ID - Y - PPL - E - K - L - D - M - V - VSY - A - N - IT - K - G - G - M - S - VPF - Y - N - SR - A - T - K - IA - I - V - VSG - E - G - C - VE - IA - CPH - L - SSSK - SSH - PSY - K - K - L - R - A - R - IR - K - D - T - VF - I - VPA - G - H - PF - A - T - VA - SG - N - E - N - L - E - I - VCF - E - VN - A - E - G - N - IR - Y - T - L - A - G - K - K - N - I - IK - VM - E - K - E - A - K - E - L - A - F - K - M - E - G - E - E - VD - K - VF - G - K - Q - D - E - E - F - F - F - Q - G - PE - W - R - K - E - K - E - G - R - A - D - E         |
| 3  | Ana o 2.0101 | L - S - VCF - L - IL - F - H - G - CL - A - SR - Q - E - W - Q - Q - Q - D - E - CQ - ID - R - L - D - A - L - E - PD - N - R - VE - Y - E - A - G - T - VE - A - W - D - PN - H - E - Q - F - R - CA - G - VA - L - VR - H - T - IQ - PN - G - L - L - L - PQ - Y - SN - A - PQ - L - IY - V - VQ - G - E - G - M - T - G - ISY - PG - CPE - T - Y - Q - A - PQ - Q - G - R - Q - Q - G - Q - SG - R - F - Q - D - R - H - Q - K - IR - R - F - R - R - G - D - I - IA - IPA - G - VA - H - W - CY - N - E - G - N - SP - V - VT - VT - L - L - D - VSN - SQ - N - Q - L - D - R - T - PR - K - F - H - L - A - G - N - PK - D - VF - Q - Q - Q - Q - Q - H - Q - SR - G - R - N - L - F - SG - F - D - T - E - L - L - A - E - A - F - Q - VD - E - R - L - IK - Q - L - K - SE - D - N - R - G - G - I - VK - VK - D - D - E - L - R - V - IR - PSR - SQ - SE - R - G - SE - SE - E - E - SE - D - E - K - R - R - W - G - Q - R - D - N - G - IE - E - T - ICT - M - R - L - K - E - N - IN - D - PA - R - A - D - IY - T - PE - VG - R - L - T - T - L - N - SL - N - L - P - IL - K - W - L - Q - L - S - VE - K - G - VL - Y - K - N - A - L - VL - PH - W - N - L - N - SH - S - I - IY - G - CK - G - K - G - Q - VQ - V - VD - N - F - G - N - R - VF - D - G - E - VR - E - G - Q - M - L - V - VPQ - N - F - A - V - VK - R - A - R - E - E - R - F - E - W - ISF - K - T - N - D - R - A - M - T - SPL - A - G - R - T - S - VL - G - G - M - PE - E - VL - A - N - A - F - Q - ISR - E - D - A - R - K - IK - F - N - N - Q - Q - T - T - L - T - SG - E - SSH - H - M - R - D - D - A                                                                                                                                                                                                                                                                                    |
| 4  | Ana o 3.0101 | M - A - K - F - L - L - L - L - SA - F - A - VL - L - L - VA - N - A - S - IY - R - A - I - VE - VE - E - D - SG - R - E - Q - SCQ - R - Q - F - E - E - Q - Q - R - F - R - N - CQ - R - Y - VK - Q - E - VQ - R - G - G - R - Y - N - Q - R - Q - E - SL - R - E - CCQ - E - L - Q - E - VD - R - R - CR - CQ - N - L - E - Q - M - VR - Q - L - Q - Q - Q - E - Q - IK - G - E - E - VR - E - L - Y - E - T - A - SE - L - PR - ICS - ISPSQ - G - CQ - F - Q - SSY                                                                                                                                                                                                                                                                                                                                                                                                                                                                                                                                                                                                                                                                                                                                                                                                                                                                                                                                                                                                                                                                                                                                                                                                                                                                                                                                                                                                                   |



|   |                 |                                                                                                                                                                                                                                                                                                                                                                                                                                                                                                                                                                                                                                                                                                                                                                                                                                                                                                                                                                                                                                                                                                                                                                                                                                                                                                                                                                                                                                                                                                    |
|---|-----------------|----------------------------------------------------------------------------------------------------------------------------------------------------------------------------------------------------------------------------------------------------------------------------------------------------------------------------------------------------------------------------------------------------------------------------------------------------------------------------------------------------------------------------------------------------------------------------------------------------------------------------------------------------------------------------------------------------------------------------------------------------------------------------------------------------------------------------------------------------------------------------------------------------------------------------------------------------------------------------------------------------------------------------------------------------------------------------------------------------------------------------------------------------------------------------------------------------------------------------------------------------------------------------------------------------------------------------------------------------------------------------------------------------------------------------------------------------------------------------------------------------|
| 5 | Car i<br>1.0101 | M-A-R-VA-A-L-L-VA-L-L-F-VA-N-A-A-A-F-R-T-T-IT-T-M-E-ID-E-D-ID-N-PR-R-R-G-E-SCR-E-Q-IQ-R-Q-Q-Y-L-N-R-CQ-D-Y-L-R-Q-Q-CR-SG-G-Y-D-E-D-N-Q-R-Q-H-F-R-Q-CCQ-Q-L-SQ-M-E-E-Q-CQ-CE-G-L-R-Q-A-VR-Q-Q-Q-Q-E-E-G-IR-G-E-E-M-E-E-M-VQ-CA-SD-L-PK-E-CG-ISSR-SCE-IR-R-SW-F                                                                                                                                                                                                                                                                                                                                                                                                                                                                                                                                                                                                                                                                                                                                                                                                                                                                                                                                                                                                                                                                                                                                                                                                                                      |
| 6 | Car i<br>2.0101 | M-VT-K-A-K-IPL-F-L-F-L-SA-L-F-L-A-L-VCSSL-A-L-E-T-E-D-L-SN-E-L-N-PH-H-D-PE-SH-R-W-E-F-Q-Q-CQ-E-R-CQ-H-E-E-R-G-Q-R-Q-A-Q-Q-CQ-R-R-CE-E-Q-L-R-E-R-E-R-E-R-E-E-I-VD-PR-E-PR-K-Q-Y-E-Q-CR-E-T-CE-K-Q-D-PR-Q-Q-PQ-CE-R-R-CE-R-Q-F-Q-E-Q-Q-E-R-E-R-R-E-R-R-R-G-R-D-D-D-D-K-E-N-PR-D-PR-E-Q-Y-R-Q-CE-E-H-CR-R-Q-G-Q-G-Q-R-Q-Q-Q-Q-CQ-SR-CE-E-R-F-E-E-E-Q-R-R-Q-E-E-R-E-R-R-R-G-R-D-N-D-D-E-E-N-PR-D-PR-E-Q-Y-R-Q-CQ-E-H-CR-R-Q-G-Q-G-Q-R-Q-Q-Q-Q-CQ-SR-CE-E-R-L-E-E-E-Q-R-K-Q-E-E-R-E-R-R-R-G-R-D-E-D-D-Q-N-PR-D-PE-Q-R-Y-E-Q-CQ-Q-Q-CE-R-Q-R-R-G-Q-E-Q-Q-L-CR-R-R-CE-Q-Q-R-Q-Q-E-E-R-E-R-Q-R-G-R-D-R-Q-D-PQ-Q-Q-Y-H-R-CQ-R-R-CQ-T-Q-E-Q-SPE-R-Q-R-Q-CQ-Q-R-CE-R-Q-Y-K-E-Q-Q-G-R-E-W-G-PD-Q-A-SPR-R-E-SR-G-R-E-E-E-Q-Q-R-H-N-PY-Y-F-H-SQ-G-L-R-SR-H-E-SG-E-G-E-VK-Y-L-E-R-F-T-E-R-T-E-L-L-R-G-IE-N-Y-R-V-V-IL-E-A-N-PN-T-F-VL-PY-H-K-D-A-E-S-V-I-V-VT-R-G-R-A-T-L-T-F-VSQ-E-R-R-E-SF-N-L-E-Y-G-D-V-IR-VPA-G-A-T-E-Y-V-IN-Q-D-SN-E-R-L-E-M-VK-L-L-Q-P-VN-N-PG-Q-F-R-E-Y-Y-A-A-G-A-Q-ST-E-SY-L-R-VF-SN-D-IL-VA-A-L-N-T-PR-D-R-L-E-R-F-F-D-Q-Q-E-Q-R-E-G-V-I-IR-A-SQ-E-K-L-R-A-L-SQ-H-A-M-SA-G-Q-R-PW-G-R-R-SSG-G-P-ISL-K-SQ-R-SSY-SN-Q-F-G-Q-F-F-E-A-CPE-E-H-R-Q-L-Q-E-M-D-VL-VN-Y-A-E-IK-R-G-A-M-M-VPH-Y-N-SK-A-T-V-V-VY-V-VE-G-T-G-R-F-E-M-A-CPH-D-VSSQ-SY-E-Y-K-G-R-R-E-Q-E-E-E-E-SST-G-Q-F-Q-K-VT-A-R-L-A-R-G-D-IF-V-IPA-G-H-P-IA-IT-A-SQ-N-E-N-L-R-L-VG-F-G-IN-G-K-N-N-Q-R-N-F-L-A-G-Q-N-N-I-IN-Q-L-E-R-E-A-K-E-L-SF-N-M-PR-E-E-IE-E-IF-E-R-Q-VE-SY-F-VPM-E-R-Q-SR-R-G-Q-G-R-D-H-PL-A-S-IL-D-F-A-G-F-F |
| 7 | Car i<br>4.0101 | M-A-K-P-IL-L-S-IY-L-CL-I-I-VA-L-F-N-G-CL-A-Q-SG-G-R-Q-Q-H-K-F-G-Q-CQ-L-N-R-L-D-A-L-E-PT-N-R-IE-A-E-A-G-V-IE-SW-D-PN-H-Q-Q-L-Q-CA-G-VA-V-VR-R-T-IE-PN-G-L-L-L-PH-Y-SN-A-PQ-L-VY-IA-R-G-R-G-IT-G-VL-F-PG-CPE-T-F-E-E-SQ-R-Q-SQ-Q-G-Q-R-R-E-F-Q-Q-D-R-H-Q-K-IR-H-F-R-E-G-D-I-IA-F-PA-G-VA-H-W-CY-N-D-G-SSP-V-VA-IF-L-L-D-T-H-N-N-A-N-Q-L-D-Q-N-PR-N-F-Y-L-A-G-N-PD-D-E-F-R-PQ-G-Q-Q-E-Y-E-Q-H-R-R-Q-Q-Q-H-Q-Q-R-R-G-E-H-G-E-Q-Q-R-D-L-G-N-N-VF-SG-F-D-A-E-F-L-A-D-A-F-N-VD-T-E-T-A-R-R-L-Q-SE-N-D-H-R-G-S-I-VR-VE-G-R-Q-L-Q-V-IR-PR-W-SR-E-E-Q-E-H-E-E-R-K-E-R-E-R-E-R-E-SE-SE-R-R-Q-SR-R-G-G-R-D-D-N-G-L-E-E-T-ICT-L-SL-R-E-N-IG-D-PSR-A-D-IY-T-E-E-A-G-R-IST-VN-SH-N-L-P-IL-R-W-L-Q-L-SA-E-R-G-A-L-Y-SD-A-L-Y-VPH-W-N-L-N-A-H-S-V-VY-A-L-R-G-R-A-E-VQ-V-VD-N-F-G-Q-T-VF-D-D-E-L-R-E-G-Q-L-L-T-IPQ-N-F-A-V-VK-R-A-R-D-E-G-F-E-W-VSF-K-T-N-E-N-A-M-VSPL-A-G-R-T-SA-IR-A-L-PE-E-VL-VN-A-F-Q-IPR-E-D-A-R-R-L-K-F-N-R-Q-E-ST-L-VR-SR-SR-SSR-SE-R-R-A-E-V                                                                                                                                                                                                                                                                                                                                                                                                                                                                                                                                                 |
| 8 | Jug r<br>1.0101 | A-A-L-L-VA-L-L-F-VA-N-A-A-A-F-R-T-T-IT-T-M-E-ID-E-D-ID-N-PR-R-R-G-E-G-CR-E-Q-IQ-R-Q-Q-N-L-N-H-CQ-Y-Y-L-R-Q-Q-SR-SG-G-Y-D-E-D-N-Q-R-Q-H-F-R-Q-CCQ-Q-L-SQ-M-D-E-Q-CQ-CE-G-L-R-Q-V-VR-R-Q-Q-Q-Q-Q-Q-G-L-R-G-E-E-M-E-E-M-VQ-SA-R-D-L-PN-E-CG-ISSQ-R-CE-IR-R-SW-F                                                                                                                                                                                                                                                                                                                                                                                                                                                                                                                                                                                                                                                                                                                                                                                                                                                                                                                                                                                                                                                                                                                                                                                                                                       |

|    |                 |                                                                                                                                                                                                                                                                                                                                                                                                                                                                                                                                                                                                                                                                                                                                                                                                                                                                                                                                                                                                                                                                                                                                                               |
|----|-----------------|---------------------------------------------------------------------------------------------------------------------------------------------------------------------------------------------------------------------------------------------------------------------------------------------------------------------------------------------------------------------------------------------------------------------------------------------------------------------------------------------------------------------------------------------------------------------------------------------------------------------------------------------------------------------------------------------------------------------------------------------------------------------------------------------------------------------------------------------------------------------------------------------------------------------------------------------------------------------------------------------------------------------------------------------------------------------------------------------------------------------------------------------------------------|
| 9  | Jug r<br>2.0101 | R-G-R-D-D-D-D-E-E-N-PR-D-PR-E-Q-Y-R-Q-CQ-E-Y-CR-R-Q-G-Q-G-Q-R-Q-Q-Q-Q-CQ-IR-CE-E-R-L-E-E-D-Q<br>-R-SQ-E-E-R-E-R-R-R-G-R-D-VD-D-Q-N-PR-D-PE-Q-R-Y-E-Q-CQ-Q-Q-CE-R-Q-R-R-G-Q-E-Q-T-L-CR-R-R-CE-<br>Q-R-R-Q-Q-E-E-R-E-R-Q-R-G-R-D-R-Q-D-PQ-Q-Q-Y-H-R-CQ-R-R-CQ-IQ-E-Q-SPE-R-Q-R-Q-CQ-Q-R-CE-R-Q-<br>Y-K-E-Q-Q-G-R-E-R-G-PE-A-SPR-R-E-SR-G-R-E-E-E-Q-Q-R-H-N-PY-Y-F-H-SQ-S-IR-SR-H-E-SE-E-G-E-VK-Y-L<br>-E-R-F-T-E-R-T-E-L-L-R-G-IE-N-Y-R-V-V-IL-D-A-N-PN-T-SM-L-PH-H-K-D-A-E-S-VA-V-VT-R-G-R-A-T-L-T-L-<br>VSQ-E-T-R-E-SF-N-L-E-CG-D-V-IR-VPA-G-A-T-VY-V-IN-Q-D-SN-E-R-L-E-M-VK-L-L-Q-P-VN-N-PG-Q-F-R-E-Y-<br>Y-A-A-G-A-K-SPD-Q-SY-L-R-VF-SN-D-IL-VA-A-L-N-T-PR-D-R-L-E-R-F-F-D-Q-Q-E-Q-R-E-G-V-I-IR-A-SQ-E-K-<br>L-R-A-L-SQ-H-A-M-SA-G-Q-R-PW-G-R-R-SSG-G-P-ISL-K-SE-SPSY-SN-Q-F-G-Q-F-F-E-A-CPE-E-H-R-Q-L-Q-E-M<br>-D-VL-VN-Y-A-E-IK-R-G-A-M-M-VPH-Y-N-SK-A-T-V-V-VY-V-VE-G-T-G-R-Y-E-M-A-CPH-VSSQ-SY-E-G-Q-G-R-R<br>-E-Q-E-E-E-E-ST-G-R-F-Q-K-VT-A-R-L-A-R-G-D-IF-V-IPA-G-H-P-IA-IT-A-SQ-N-E-N-L-R-L-L-G-F-D-IN-G-E-<br>N-N-Q-R-D-F-L-A-G-Q-N-N-I-IN-Q-L-E-R-E-A-K-E-L-SF-N-M-PR-E-E-IE-E-IF-E-SQ-M-E-SY-F-VPT-E-R-Q-SR-<br>R-G-Q-G-R-D-H-PL-A-S-IL-D-F-A-F-F |
| 10 | Jug r 3         | M-T-G-SL-VL-K-L-SG-M-VL-L-CM-V-VA-A-P-VA-E-A-V-IT-CG-Q-VA-SS-VG-SC-IG-Y-L-R-G-T-VPT-VPPSCCN-G-VK-<br>SL-N-K-A-A-A-T-T-A-D-R-Q-A-A-CE-CL-K-K-T-SG-S-IPG-L-N-PG-L-A-A-G-L-PG-K-CG-VS-VPY-K-IST-ST-N-CK-A<br>-VK                                                                                                                                                                                                                                                                                                                                                                                                                                                                                                                                                                                                                                                                                                                                                                                                                                                                                                                                                 |
| 11 | Jug r<br>4.0101 | M-A-K-P-IL-L-S-IY-L-F-L-I-VA-L-F-N-G-CL-A-Q-SG-G-R-Q-Q-Q-Q-F-G-Q-CQ-L-N-R-L-D-A-L-E-PT-N-R-IE-A-<br>E-A-G-V-IE-SW-D-PN-N-Q-Q-F-Q-CA-G-VA-V-VR-R-T-IE-PN-G-L-L-L-PQ-Y-SN-A-PQ-L-VY-IA-R-G-R-G-IT-G-VL<br>-F-PG-CPE-T-F-E-E-SQ-R-Q-SQ-Q-G-Q-SR-E-F-Q-Q-D-R-H-Q-K-IR-H-F-R-E-G-D-I-IA-F-PA-G-VA-H-W-SY-N-<br>D-G-SN-P-V-VA-ISL-L-D-T-N-N-N-A-N-Q-L-D-Q-N-PR-N-F-Y-L-A-G-N-PD-D-E-F-R-PQ-G-Q-Q-E-Y-E-Q-H-R-<br>R-Q-Q-Q-R-Q-Q-R-PG-E-H-G-Q-Q-Q-R-G-L-G-N-N-VF-SG-F-D-A-D-F-L-A-D-A-F-N-VD-T-E-T-A-R-R-L-Q-SE<br>-N-D-H-R-R-S-I-VR-VE-G-R-Q-L-Q-V-IR-PR-W-SR-E-E-Q-E-R-E-E-R-K-E-R-E-R-E-R-E-SE-SE-R-R-Q-SR-R-G-<br>G-R-D-D-N-G-L-E-E-T-ICT-L-R-L-R-E-N-IG-D-PSR-A-D-IY-T-E-E-A-G-R-IST-VN-SH-T-L-P-VL-R-W-L-Q-L-SA-E<br>-R-G-A-L-Y-SD-A-L-Y-VPH-W-N-L-N-A-H-S-V-VY-A-L-R-G-R-A-E-VQ-V-VD-N-F-G-Q-T-VF-D-D-E-L-R-E-G-Q<br>-L-L-T-IPQ-N-F-A-V-VK-R-A-R-N-E-G-F-E-W-VSF-K-T-N-E-N-A-M-VSPL-A-G-R-T-SA-IR-A-L-PE-E-VL-A-T-A-F<br>-Q-IPR-E-D-A-R-R-L-K-F-N-R-Q-E-ST-L-VR-SR-PSR-SR-SSR-SE-R-R-A-E-V                                                                                                                                                                     |
| 12 | Pis v<br>1.0101 | M-A-K-L-VL-L-L-SA-F-A-F-L-IL-A-A-N-A-S-IY-R-A-T-VE-VE-G-E-N-L-SSG-Q-SCQ-K-Q-F-E-E-Q-Q-K-F-K-H-CQ<br>-M-Y-VQ-Q-E-VQ-K-SQ-D-G-H-SL-T-A-R-IN-Q-R-Q-Q-CF-K-Q-CCQ-E-L-Q-E-VD-K-K-CR-CQ-N-L-E-Q-M-VK-R-<br>Q-Q-Q-Q-Q-G-Q-F-R-G-E-K-L-Q-E-L-Y-E-T-A-SE-L-PR-M-CN-ISPSQ-G-CQ-F-SSPY-W-SY                                                                                                                                                                                                                                                                                                                                                                                                                                                                                                                                                                                                                                                                                                                                                                                                                                                                              |
| 13 | Pis v<br>2.0101 | M-G-Y-SSL-L-SF-SL-G-F-L-L-L-F-H-CSF-A-Q-IE-Q-V-VN-SQ-Q-R-Q-Q-Q-Q-R-F-Q-T-Q-CQ-IQ-N-L-N-A-L-E-PK-<br>R-R-IE-SE-A-G-VT-E-F-W-D-Q-N-E-E-Q-L-Q-CA-N-VA-VF-R-H-T-IQ-SR-G-L-L-VPSY-D-N-A-PE-L-VY-V-VQ-G-SG<br>-IH-G-A-VF-PG-CPE-T-F-Q-E-E-SQ-SR-SR-SE-R-SQ-Q-SG-E-Q-H-Q-K-VR-P-IQ-E-G-D-V-IA-L-PA-G-VA-H-W-IY-N<br>-N-G-Q-SK-L-VL-VA-L-A-D-VG-N-SE-N-Q-L-D-Q-Y-L-R-K-F-VL-G-G-SPQ-Q-E-IQ-G-SG-Q-SR-SR-SQ-SQ-SSR-R-G<br>-Q-Q-G-Q-Q-SN-N-IL-SA-F-D-E-E-IL-A-Q-SF-N-ID-T-Q-L-A-R-R-L-Q-K-E-K-R-Q-R-G-I-I-VR-VQ-E-D-L-E-VL-<br>SPH-R-Q-E-Q-E-Q-E-Y-E-E-E-R-E-R-R-Q-R-N-G-L-E-E-T-F-CT-M-T-L-K-Y-N-IN-D-PSR-A-D-VY-N-PR-G-G-R-<br>VSS-VN-A-L-N-L-P-IL-R-F-L-Q-L-SA-K-K-G-VL-H-R-D-A-IL-A-PH-W-N-VN-A-H-S-I-VY-IT-R-G-N-G-R-IQ-I-VSE-<br>N-G-E-S-VF-D-E-E-IR-E-G-Q-L-V-V-VPQ-N-F-A-V-VK-R-A-SSD-K-F-E-W-VSF-K-T-N-G-L-SQ-T-SQ-L-A-G-R-VS<br>-VF-R-A-L-PL-D-V-IK-N-SF-D-ISR-E-D-A-R-R-L-K-E-SR-SE-T-T-IF-A-PG-SSSQ-R-K-SQ-SE-R-E-R-Q-R-E-R-E-E-R<br>-E-IH                                                                                                                                                                                                                  |

|    |                 |                                                                                                                                                                                                                                                                                                                                                                                                                                                                                                                                                                                                                                                                                                                                                                                                                                                                                                                                                                                                                                                                                                                                                                                                                                                                                                                                                                                                                                                                                                                                                                                                                                                                                                                                                                                                                                            |
|----|-----------------|--------------------------------------------------------------------------------------------------------------------------------------------------------------------------------------------------------------------------------------------------------------------------------------------------------------------------------------------------------------------------------------------------------------------------------------------------------------------------------------------------------------------------------------------------------------------------------------------------------------------------------------------------------------------------------------------------------------------------------------------------------------------------------------------------------------------------------------------------------------------------------------------------------------------------------------------------------------------------------------------------------------------------------------------------------------------------------------------------------------------------------------------------------------------------------------------------------------------------------------------------------------------------------------------------------------------------------------------------------------------------------------------------------------------------------------------------------------------------------------------------------------------------------------------------------------------------------------------------------------------------------------------------------------------------------------------------------------------------------------------------------------------------------------------------------------------------------------------|
| 14 | Pis v<br>2.0201 | M - G - Y - SSL - L - SF - SL - G - F - L - L - L - F - H - CSF - A - Q - IE - Q - V - VN - SQ - Q - R - Q - Q - Q - R - F - Q - T - Q - CQ - IQ - N - L - N - A - L - E - PK - R - R - IE - SE - A - G - VT - E - F - W - D - Q - N - E - E - Q - L - Q - CA - N - VA - VF - R - H - T - IQ - SR - G - L - L - VPSY - N - N - A - PE - L - VY - V - VQ - G - SG - IH - G - A - VF - PG - CPE - T - F - Q - E - E - SQ - SQ - SR - SQ - H - SR - SE - R - SQ - Q - SG - E - Q - H - Q - K - VR - H - IR - E - G - D - I - IA - L - PA - G - VA - H - W - IY - N - N - G - Q - SK - L - VL - VA - L - A - D - VG - N - SE - N - Q - L - D - Q - Y - L - R - K - F - VL - G - G - SPQ - Q - E - IQ - G - G - G - Q - SW - SQ - SR - SSR - K - G - Q - Q - SN - N - IL - SA - F - D - E - E - IL - A - Q - SF - N - ID - T - Q - L - VK - K - L - Q - R - E - E - K - Q - R - G - I - I - VR - VK - E - D - L - Q - VL - SPQ - R - Q - E - K - E - Y - SD - N - G - L - E - E - T - F - CT - M - T - L - K - L - N - IN - D - PSR - A - D - VY - N - PR - G - G - R - VT - S - IN - A - L - N - L - P - IL - R - F - L - Q - L - S - VE - K - G - VL - Y - Q - N - A - IM - A - PH - W - N - M - N - A - H - S - I - VY - IT - R - G - N - G - R - M - Q - I - VSE - N - G - E - S - VF - D - E - E - IR - E - G - Q - L - V - V - VPQ - N - F - A - V - VK - R - A - SSD - G - F - E - W - VSF - K - T - N - G - L - A - K - ISQ - L - A - G - R - IS - VM - R - G - L - PL - D - V - IQ - N - SF - D - ISR - E - D - A - W - N - L - K - E - SR - SE - M - T - IF - A - PG - SR - SQ - R - Q - R - N                                                                                                                                                                                                                                        |
| 15 | Pis v<br>3.0101 | K - T - D - PE - L - K - Q - CK - H - Q - CK - VQ - R - Q - Y - D - E - E - Q - K - E - Q - CA - K - G - CE - K - Y - Y - K - E - K - K - G - R - E - Q - E - E - E - E - E - E - E - W - G - SG - R - G - R - G - D - E - F - ST - H - E - PG - E - K - R - L - SQ - CM - K - Q - CE - R - Q - D - G - G - Q - Q - K - Q - L - CR - F - R - CQ - E - K - Y - K - K - E - R - R - E - H - SY - SR - D - E - E - E - E - E - E - G - D - E - E - Q - E - E - E - D - E - N - PY - VF - E - D - E - H - F - T - T - R - VK - T - E - Q - G - K - V - V - VL - PK - F - T - K - R - SK - L - L - R - G - L - E - K - Y - R - L - A - F - L - VA - N - PQ - A - F - V - VPN - H - M - D - A - D - S - IF - F - VSW - G - R - G - T - IT - K - IR - E - N - K - R - E - SM - N - VK - Q - G - D - I - IR - IR - A - G - T - PF - Y - I - VN - T - D - E - N - E - K - L - Y - I - VK - L - L - Q - P - VN - L - PG - H - Y - E - VF - H - G - PG - G - E - N - PE - SF - Y - R - A - F - SR - E - VL - E - A - A - L - K - T - PR - D - K - L - E - K - L - F - E - K - Q - D - E - G - A - I - VK - A - SK - E - Q - IR - A - M - SR - R - G - E - G - PS - IW - PF - T - G - K - ST - G - T - F - N - L - F - K - K - D - PSQ - SN - N - Y - G - Q - L - F - E - SE - F - K - D - Y - PPL - Q - E - L - D - IM - VSY - VN - IT - K - G - G - M - SG - PF - Y - N - SR - A - T - K - IA - I - V - VSG - E - G - R - L - E - IA - CPH - L - SSSK - N - SG - Q - E - K - SG - PSY - K - K - L - SSS - IR - T - D - S - VF - V - VPA - G - H - PF - VT - VA - SG - N - Q - N - L - E - IL - CF - E - VN - A - E - G - N - IR - Y - T - L - A - G - K - K - N - I - IE - VM - E - K - E - A - K - E - L - A - F - K - T - K - G - E - E - VD - K - VF - G - K - Q - D - E - E - F - F - F - Q - G - PK - W - R - Q - H - Q - Q - G - R - A - D - E |
| 16 | Pis v<br>4.0101 | M - A - L - L - SY - VT - R - K - T - L - T - E - SL - R - L - G - L - K - SH - VR - G - L - Q - T - F - T - L - PD - L - PY - E - Y - G - A - L - E - PA - ISSE - IM - Q - L - H - H - Q - K - H - H - Q - T - Y - IT - N - Y - N - K - A - L - E - Q - L - D - Q - A - IN - K - G - D - A - SA - V - VK - L - Q - SA - IK - F - N - G - G - G - H - IN - H - S - IF - W - K - N - L - T - P - VSE - G - G - G - E - PPH - G - SL - G - W - A - ID - T - N - F - G - SM - E - A - L - IQ - R - M - N - A - E - G - A - A - L - Q - G - SG - W - VW - L - G - L - D - K - E - SK - K - L - V - VE - T - T - A - N - Q - D - PL - VT - K - G - PSL - VPL - L - G - ID - VW - E - H - A - Y - Y - L - Q - Y - K - N - VR - PD - Y - L - K - N - IW - K - V - IN - W - K - Y - A - G - E - L - Y - Q - K - E - CP                                                                                                                                                                                                                                                                                                                                                                                                                                                                                                                                                                                                                                                                                                                                                                                                                                                                                                                                                                                                                             |
| 17 | Pis v<br>5.0101 | M - A - N - PSL - L - SL - S - VCL - L - IL - F - H - G - CL - A - SR - Q - Q - G - Q - Q - Q - N - E - CQ - ID - Q - L - D - A - L - E - PD - N - R - VE - Y - E - A - G - M - VE - T - W - D - PN - H - E - Q - F - R - CA - G - VA - VA - R - H - T - IQ - PN - G - L - R - L - PE - Y - SN - A - PT - L - M - Y - I - VE - G - E - G - M - T - G - T - L - IPG - CPE - T - Y - Q - A - PQ - Q - G - Q - Q - H - G - Q - SSR - F - Q - D - K - H - Q - K - IQ - R - F - R - K - G - D - I - IA - L - PA - G - VA - N - W - CY - N - E - G - N - SP - V - VT - VT - L - L - D - VSN - SQ - N - Q - L - D - M - Y - PR - K - F - N - L - A - G - N - PE - D - E - F - Q - Q - Q - Q - Q - Q - Q - SR - G - R - R - Q - SQ - Q - K - SCN - N - IF - CG - F - D - T - K - IL - A - E - VF - Q - VE - Q - SL - VK - Q - L - Q - N - E - K - D - N - R - G - A - I - VK - VK - G - D - L - Q - V - IR - PPR - R - Q - SE - R - G - F - E - SE - E - E - SE - Y - E - R - G - R - R - G - R - D - N - G - L - E - E - T - ICT - M - K - L - K - E - N - IH - D - PSR - SD - IY - T - PE - VG - R - IT - SL - N - SL - N - L - P - IL - K - W - L - Q - L - SA - E - R - G - VL - Q - N - N - A - L - M - VPH - W - N - F - N - A - H - S - I - VY - G - CK - G - N - A - Q - VQ - V - VD - N - F - G - N - T - VF - D - G - E - VSE - G - Q - IF - V - VPQ - N - F - A - V - VK - R - A - R - G - Q - R - F - E - W - ISF - K - T - N - D - R - A - M - ISPL - A - G - ST - S - VL - R - A - M - PE - E - VL - A - N - A - F - Q - ISR - E - D - A - R - K - IK - F - N - N - E - Q - PT - L - SSG - Q - SSQ - Q - M - R - D - D - A                                                                                                                                                                                                           |

“-“ – Bond predicted to be susceptible to proteolysis by pepsin, trypsin and chymotrypsin.
